# Supplementary material for: A Label-Free Quantitative Proteomic Analysis of Mouse Neutrophil Extracellular Trap Formation Induced by Streptococcus suis or Phorbol Myristate Acetate (PMA)
Source: Front Immunol. 2018 Nov 13;9:2615. doi: 10.3389/fimmu.2018.02615 (PMC6282035; doi:10.3389/fimmu.2018.02615)
Supplement: Data S2 — Proteins identified using MS. [file Data_Sheet_2.XLS]

## Sheet: Cellular proteins
Protein IDs	Fasta headers	Number of proteins	Peptides	Razor + unique peptides	Unique peptides	Sequence coverage [%]	Mol. weight [kDa]	Potential contaminant	iBAQ	iBAQ CON_1	iBAQ CON_2	iBAQ CON_3	iBAQ PMA_1	iBAQ PMA_2	iBAQ PMA_3	iBAQ S.suis_1	iBAQ S.suis_2	iBAQ S.suis_3
Q9MQW4;Q7JCX7;Q7JCA9;Q5GA78;K7XK11;G3EBA9;B9V188;A3R458;A3R3W7;A3E4B3;A0A141CM47;A0A0F6PYW7;A0A075DCG2;A0A023J6D3;A0A023J699;A0A023J698;A0A023J667;A0A023J659;A0A023J622;P00416	tr|Q9MQW4|Q9MQW4_MOUSE Cytochrome c oxidase subunit 3 OS=Mus musculus domesticus GN=COX3 PE=3 SV=1;tr|Q7JCX7|Q7JCX7_MOUSE Cytochrome c oxidase subunit 3 OS=Mus musculus GN=mt-Co3 PE=1 SV=1;tr|Q7JCA9|Q7JCA9_MOUSE Cytochrome c oxidase subunit 3 OS=Mus muscul	20	1	1	1	5.4	29.922		605990000	100310000	0	5362100	42824000	117690000	92542000	96932000	61999000	88339000
Q7JD03;Q7JCZ1;Q5GA81;K7XKA7;K7XK22;A3R481;A3R455;A3E4B0;A0A0F6PXF3;A0A075DC90;A0A023J6F3;P00405;A0A023J6I7;A0A023J607;A0A023J5Y1	tr|Q7JD03|Q7JD03_MOUSE Cytochrome c oxidase subunit 2 OS=Mus musculus domesticus GN=COX2 PE=3 SV=1;tr|Q7JCZ1|Q7JCZ1_MOUSE Cytochrome c oxidase subunit 2 OS=Mus musculus GN=mt-Co2 PE=1 SV=1;tr|Q5GA81|Q5GA81_MUSMM Cytochrome c oxidase subunit 2 OS=Mus muscul	15	5	5	5	26.4	25.976		506690000	47085000	20920000	36975000	68123000	57940000	97882000	51395000	66282000	60092000
A0A068BEQ2;P50171;G3UX44	tr|A0A068BEQ2|A0A068BEQ2_MOUSE H2-K region expressed gene 6, isoform CRA_a OS=Mus musculus GN=H2-Ke6 PE=2 SV=1;sp|P50171|DHB8_MOUSE Estradiol 17-beta-dehydrogenase 8 OS=Mus musculus GN=Hsd17b8 PE=1 SV=2;tr|G3UX44|G3UX44_MOUSE H2-K region-expressed gene 6 (	3	2	2	2	10.8	26.587		23046000	0	1102600	1307800	386790	1616000	5298200	4638800	6869800	1825700
Q5D0F3;Q3TBA3;Q78E61;Q64333;Q62429;Q62428;Q3U6V4;Q3U543;A0A068BER1;P21958;Q9QWR3;F6QHF1	tr|Q5D0F3|Q5D0F3_MOUSE Tap1 protein OS=Mus musculus GN=Tap1 PE=2 SV=1;tr|Q3TBA3|Q3TBA3_MOUSE Antigen peptide transporter 1 OS=Mus musculus GN=Tap1 PE=1 SV=1;tr|Q78E61|Q78E61_MOUSE TAP1-g7 OS=Mus musculus GN=Tap1 PE=2 SV=1;tr|Q64333|Q64333_MUSMC TAP1-cas OS	12	4	4	4	6.9	63.45		14078000	1947500	634200	506510	2025900	1482200	2725300	1998300	925560	1832200
Q78ZJ8;A0A068BFR3;P46638;G3UY29;E9Q3P9;F8WGS1;G3UZD3;Q3UZ37;G3UZL4;Q9QWU0;D3YYB3;Q0PD30;Q9WTL2	tr|Q78ZJ8|Q78ZJ8_MOUSE MCG22989, isoform CRA_b OS=Mus musculus GN=Rab11b PE=1 SV=1;tr|A0A068BFR3|A0A068BFR3_MOUSE RAS oncogene family protein OS=Mus musculus GN=Rab11b PE=2 SV=1;sp|P46638|RB11B_MOUSE Ras-related protein Rab-11B OS=Mus musculus GN=Rab11b PE	13	11	11	2	50.9	24.489		418810000	43344000	33300000	42625000	45639000	34667000	65072000	49729000	39072000	65363000
A0A068BGR9;Q9Z1P6	tr|A0A068BGR9|A0A068BGR9_MOUSE NADH dehydrogenase OS=Mus musculus GN=Ndufa7 PE=2 SV=1;sp|Q9Z1P6|NDUA7_MOUSE NADH dehydrogenase [ubiquinone] 1 alpha subcomplex subunit 7 OS=Mus musculus GN=Ndufa7 PE=1 SV=3	2	2	2	2	21.2	12.605		18600000	2491900	4724700	4159300	0	2581700	0	0	0	4642300
Q3UA79;Q80WF7;Q792S7;Q61232;Q61231;Q61229;Q61228;Q61227;A0A068BGU5;P36371;Q3TXM1;Q61230	tr|Q3UA79|Q3UA79_MOUSE Uncharacterized protein OS=Mus musculus GN=Tap2 PE=2 SV=1;tr|Q80WF7|Q80WF7_MOUSE Tap2 protein OS=Mus musculus GN=Tap2 PE=2 SV=2;tr|Q792S7|Q792S7_MOUSE Antigen processing transporter TAP2 OS=Mus musculus GN=Tap2 PE=1 SV=1;tr|Q61232|Q6	12	6	6	6	9.7	77.313		17992000	934510	1123400	1725000	1945600	1537100	3371900	2467300	1608800	3278400
A0A068BIT8;P28063;G3UZW8	tr|A0A068BIT8|A0A068BIT8_MOUSE Proteasome subunit beta type OS=Mus musculus GN=Psmb8 PE=2 SV=1;sp|P28063|PSB8_MOUSE Proteasome subunit beta type-8 OS=Mus musculus GN=Psmb8 PE=1 SV=2;tr|G3UZW8|G3UZW8_MOUSE Proteasome subunit beta type (Fragment) OS=Mus musc	3	8	8	8	29.7	30.359		192710000	20448000	18790000	22811000	17730000	15428000	26813000	23155000	20879000	26655000
A0A068EW80;Q60953;Q8BSJ6;F7BTZ2;D3Z3A6;D3YXR5	tr|A0A068EW80|A0A068EW80_MOUSE Promyelocytic leukemia OS=Mus musculus GN=Pml PE=2 SV=1;sp|Q60953|PML_MOUSE Protein PML OS=Mus musculus GN=Pml PE=1 SV=3;tr|Q8BSJ6|Q8BSJ6_MOUSE Uncharacterized protein (Fragment) OS=Mus musculus GN=Pml PE=1 SV=1;tr|F7BTZ2|F7B	6	2	2	2	2.5	98.241		2656900	0	325330	495480	161800	218520	233620	666500	138090	417600
A0A068WAZ7;A2A839;A2A838;A0A068WAQ5;A2A842;B6ZHC8;A2A841;P48193;Q3V048;B6ZHC3;F7BUB8;B6ZHC2;F6S4K9;Q3UH12;A0A1D5RLV1;A2AUK6;A2AD32;A2AUK7;Q8C8P2;A2AUK8;B6ZHC9;A2AUK5;E9PV14;Q9Z2H5	tr|A0A068WAZ7|A0A068WAZ7_MOUSE Protein 4.1R (Fragment) OS=Mus musculus GN=Epb41 PE=2 SV=1;tr|A2A839|A2A839_MOUSE Protein 4.1 OS=Mus musculus GN=Epb41 PE=1 SV=1;tr|A2A838|A2A838_MOUSE Protein 4.1 (Fragment) OS=Mus musculus GN=Epb41 PE=1 SV=1;tr|A0A068WAQ5|A	24	2	2	2	4.7	69.194		3127400	686320	470330	719340	104060	175900	0	280290	282570	408560
A0A077S2U6;P08905	tr|A0A077S2U6|A0A077S2U6_MOUSE Lysozyme OS=Mus musculus GN=Lyz2 PE=1 SV=1;sp|P08905|LYZ2_MOUSE Lysozyme C-2 OS=Mus musculus GN=Lyz2 PE=1 SV=2	2	4	4	2	36.5	16.689		4659700000	711940000	384020000	486630000	191220000	138390000	263590000	732000000	831040000	920900000
A0A077S9N1;P17897	tr|A0A077S9N1|A0A077S9N1_MOUSE Lysozyme OS=Mus musculus GN=Lyz1 PE=3 SV=1;sp|P17897|LYZ1_MOUSE Lysozyme C-1 OS=Mus musculus GN=Lyz1 PE=1 SV=1	2	3	1	1	20.9	16.794		45923000	0	0	0	1236100	2216000	0	5585400	11390000	25496000
A0A087WNP6;Q4VAA2;F8WGL9;A0A087WS49;A0A087WRM0	tr|A0A087WNP6|A0A087WNP6_MOUSE Protein CDV3 OS=Mus musculus GN=Cdv3 PE=1 SV=1;sp|Q4VAA2|CDV3_MOUSE Protein CDV3 OS=Mus musculus GN=Cdv3 PE=1 SV=2	5	5	5	5	26	24.196		64215000	5295800	6648000	2633700	6278800	3577500	12225000	5932700	10576000	11048000
A0A087WNS9;Q8JZT1;A0A087WQ65;A0A087WRZ2;A0A087WNT2;A0A087WPY4;Q9CXN2;Q99JA5;Q64253	tr|A0A087WNS9|A0A087WNS9_MOUSE Lymphocyte antigen 6E (Fragment) OS=Mus musculus GN=Ly6e PE=1 SV=6;tr|Q8JZT1|Q8JZT1_MOUSE Ly6e protein (Fragment) OS=Mus musculus GN=Ly6e PE=2 SV=1;tr|A0A087WQ65|A0A087WQ65_MOUSE Lymphocyte antigen 6E (Fragment) OS=Mus muscul	9	1	1	1	22.2	6.9541		52935000	6603700	10898000	17239000	0	0	1921400	2457400	4200100	9615700
A0A087WQE6;A0A087WNT1;P83940;A0A087WPE4	tr|A0A087WQE6|A0A087WQE6_MOUSE Elongin-C (Fragment) OS=Mus musculus GN=Eloc PE=1 SV=1;tr|A0A087WNT1|A0A087WNT1_MOUSE Elongin-C OS=Mus musculus GN=Eloc PE=1 SV=1;sp|P83940|ELOC_MOUSE Elongin-C OS=Mus musculus GN=Eloc PE=1 SV=1;tr|A0A087WPE4|A0A087WPE4_MOUSE	4	3	3	3	46.3	10.657		124140000	4668300	5250400	7527900	18128000	18617000	23125000	9866700	10787000	26166000
A0A0A6YXZ1;E9Q6L0;B2RY22;J3QP81;A0A087WS18;A0A087WQF1;A0A087WQ95;A0A087WNW8;A0A087WRK0;A0A087WP42;E9QNY9;A0A087WRE8;E9QKH0;A0A087WQ31;Q80TV8;A5D6Q8;Q8R337;A0A0N4SUT7;A0A1L1ST22	tr|A0A0A6YXZ1|A0A0A6YXZ1_MOUSE CLIP-associating protein 1 OS=Mus musculus GN=Clasp1 PE=1 SV=2;tr|E9Q6L0|E9Q6L0_MOUSE CLIP-associating protein 1 OS=Mus musculus GN=Clasp1 PE=1 SV=2;tr|B2RY22|B2RY22_MOUSE Clasp1 protein OS=Mus musculus GN=Clasp1 PE=2 SV=1;tr	19	3	1	1	3.4	136.62		8770500	0	0	0	0	0	0	3788000	4982500	0
A0A087WRP7;A0A087WNZ5;P0CW02;P0CW03	tr|A0A087WRP7|A0A087WRP7_MOUSE Lymphocyte antigen 6C1 (Fragment) OS=Mus musculus GN=Ly6c1 PE=1 SV=1;tr|A0A087WNZ5|A0A087WNZ5_MOUSE Lymphocyte antigen 6C1 OS=Mus musculus GN=Ly6c1 PE=1 SV=1;sp|P0CW02|LY6C1_MOUSE Lymphocyte antigen 6C1 OS=Mus musculus GN=Ly6	4	3	3	3	33.3	12.032		536180000	44330000	14728000	18692000	42982000	45559000	70339000	104330000	77716000	117510000
A0A087WNZ7;G5E870;A0A087WRV6;Q3TP48;A0A087WQ02;A0A087WP92;A0A0B4J1N9	tr|A0A087WNZ7|A0A087WNZ7_MOUSE E3 ubiquitin-protein ligase TRIP12 OS=Mus musculus GN=Trip12 PE=1 SV=1;sp|G5E870|TRIPC_MOUSE E3 ubiquitin-protein ligase TRIP12 OS=Mus musculus GN=Trip12 PE=1 SV=1;tr|A0A087WRV6|A0A087WRV6_MOUSE E3 ubiquitin-protein ligase TR	7	6	6	6	3.7	220.66		4388800	394340	515700	466200	300010	250510	192100	860450	836920	572530
A0A087WP83;Q3V1M8;Q3U4Z7;Q8VDJ3;A0A087WQY9;A0A087WPC5;A0A087WS92;Q8BX68;A0A087WPH2	tr|A0A087WP83|A0A087WP83_MOUSE Vigilin OS=Mus musculus GN=Hdlbp PE=1 SV=1;tr|Q3V1M8|Q3V1M8_MOUSE Uncharacterized protein OS=Mus musculus GN=Hdlbp PE=2 SV=1;tr|Q3U4Z7|Q3U4Z7_MOUSE High density lipoprotein (HDL) binding protein, isoform CRA_d OS=Mus musculus	9	5	5	5	5.3	134.21		4663300	479840	491580	859320	967600	303550	1062800	0	364450	134200
A0A087WP98;A0A087WPN6;Q3U6E4;Q0VGU2;A0A087WQN2;P26350	tr|A0A087WP98|A0A087WP98_MOUSE Prothymosin alpha OS=Mus musculus GN=Ptma PE=1 SV=1;tr|A0A087WPN6|A0A087WPN6_MOUSE Prothymosin alpha OS=Mus musculus GN=Ptma PE=1 SV=1;tr|Q3U6E4|Q3U6E4_MOUSE Uncharacterized protein OS=Mus musculus GN=Ptma PE=2 SV=1;tr|Q0VGU2	6	1	1	1	24.1	6.4913		420360000	29512000	144290000	96068000	59510000	19295000	22512000	17545000	22225000	9408300
A0A087WPL5;E9QNN1;O70133;Q3UR42;A0A0R4J2C3;Q05BR6;Q3TF92;Q3TEB2;A0A087WRT3	tr|A0A087WPL5|A0A087WPL5_MOUSE ATP-dependent RNA helicase A OS=Mus musculus GN=Dhx9 PE=1 SV=1;tr|E9QNN1|E9QNN1_MOUSE ATP-dependent RNA helicase A OS=Mus musculus GN=Dhx9 PE=1 SV=1;sp|O70133|DHX9_MOUSE ATP-dependent RNA helicase A OS=Mus musculus GN=Dhx9 PE	9	27	27	27	23	149.62		109660000	6794300	9574300	11281000	8404800	10513000	16700000	13504000	14867000	18026000
F6UND7;A0A087WQ04;P08103	tr|F6UND7|F6UND7_MOUSE Tyrosine-protein kinase OS=Mus musculus GN=Hck PE=1 SV=1;tr|A0A087WQ04|A0A087WQ04_MOUSE Tyrosine-protein kinase OS=Mus musculus GN=Hck PE=1 SV=1;sp|P08103|HCK_MOUSE Tyrosine-protein kinase HCK OS=Mus musculus GN=Hck PE=1 SV=4	3	9	7	7	18.3	59.111		74393000	4811100	11611000	11572000	5930200	7962200	8384700	5986500	7189100	10946000
A0A087WS26;A0A0R4J2B7;B2RWY0;A0A087WRP5;A0A087WQ86;E9QM99;Q8BZN6	tr|A0A087WS26|A0A087WS26_MOUSE Dedicator of cytokinesis protein 10 (Fragment) OS=Mus musculus GN=Dock10 PE=1 SV=1;tr|A0A0R4J2B7|A0A0R4J2B7_MOUSE Dedicator of cytokinesis protein 10 (Fragment) OS=Mus musculus GN=Dock10 PE=1 SV=1;tr|B2RWY0|B2RWY0_MOUSE Dock1	7	1	1	1	2.1	65.146		2409700	16846	0	0	448840	609280	549400	442790	342580	0
A0A087WRN1;Q3TSZ0;A0A087WQA0;Q3UR37;F8WI22;Q3UDL9;Q8K019;Q3TRC6;Q05C67	tr|A0A087WRN1|A0A087WRN1_MOUSE Bcl-2-associated transcription factor 1 (Fragment) OS=Mus musculus GN=Bclaf1 PE=1 SV=1;tr|Q3TSZ0|Q3TSZ0_MOUSE Uncharacterized protein OS=Mus musculus GN=Bclaf1 PE=2 SV=1;tr|A0A087WQA0|A0A087WQA0_MOUSE Bcl-2-associated transcr	9	6	6	6	12.7	67.703		23539000	2715600	2330500	2313900	1691200	1371900	2326100	2922900	2752200	5115100
A0A087WQD1;A0A087WSB1;Q99M51;Q8BH99	tr|A0A087WQD1|A0A087WQD1_MOUSE Cytoplasmic protein NCK1 (Fragment) OS=Mus musculus GN=Nck1 PE=1 SV=1;tr|A0A087WSB1|A0A087WSB1_MOUSE Cytoplasmic protein NCK1 (Fragment) OS=Mus musculus GN=Nck1 PE=1 SV=1;sp|Q99M51|NCK1_MOUSE Cytoplasmic protein NCK1 OS=Mus m	4	3	3	3	22.7	15.172		47723000	7624300	7911100	6036600	4287800	3435600	4701500	4761600	5314500	3649900
A0A087WQF5;P35461	tr|A0A087WQF5|A0A087WQF5_MOUSE Lymphocyte antigen 6G OS=Mus musculus GN=Ly6g PE=4 SV=1;sp|P35461|LY6G_MOUSE Lymphocyte antigen 6G (Fragment) OS=Mus musculus GN=Ly6g PE=2 SV=1	2	1	1	1	18.7	14.324		1179800000	115330000	38996000	43833000	115770000	106310000	153750000	191950000	195450000	218420000
A0A087WQH8	tr|A0A087WQH8|A0A087WQH8_MOUSE Probable UDP-sugar transporter protein SLC35A4 OS=Mus musculus GN=Slc35a4 PE=1 SV=1	1	1	1	1	21.4	11.157		15379000	0	0	0	2276100	1455400	2390100	2345100	4035100	2877000
A0A087WQS2;Q9CQC6;A0A087WPF9;A0A087WS48;Q9CVI6	tr|A0A087WQS2|A0A087WQS2_MOUSE Basic leucine zipper and W2 domain-containing protein 1 OS=Mus musculus GN=Bzw1 PE=1 SV=1;sp|Q9CQC6|BZW1_MOUSE Basic leucine zipper and W2 domain-containing protein 1 OS=Mus musculus GN=Bzw1 PE=1 SV=1;tr|A0A087WPF9|A0A087WPF9	5	7	7	7	18.6	51.209		88109000	8448900	11129000	12535000	8311600	6121900	12996000	10255000	9844200	8467800
Q4FK85;Q3U607;A0A087WQT6;O89110	tr|Q4FK85|Q4FK85_MOUSE Casp8 protein OS=Mus musculus GN=Casp8 PE=2 SV=1;tr|Q3U607|Q3U607_MOUSE Caspase 8, isoform CRA_a OS=Mus musculus GN=Casp8 PE=1 SV=1;tr|A0A087WQT6|A0A087WQT6_MOUSE Caspase-8 OS=Mus musculus GN=Casp8 PE=1 SV=1;sp|O89110|CASP8_MOUSE Cas	4	3	3	3	8.5	55.257		12316000	654090	663460	353390	1329800	1002300	2113800	2019400	1663900	2515400
A0A087WR13;L7N1Y0;E9Q0T8	tr|A0A087WR13|A0A087WR13_MOUSE Dynein, axonemal, heavy chain 7C OS=Mus musculus GN=Dnah7c PE=1 SV=1;tr|L7N1Y0|L7N1Y0_MOUSE Dynein, axonemal, heavy chain 7B OS=Mus musculus GN=Dnah7b PE=1 SV=1	3	3	3	3	0.6	462.04		7008700	875000	499970	437620	523750	710120	897720	946710	998850	1118900
Q62347;Q61442;A0A087WRI6;Q543W0;Q547S9;Q01147	tr|Q62347|Q62347_MOUSE Cyclic AMP-responsive element-binding protein 1 OS=Mus musculus GN=Creb1 PE=1 SV=1;tr|Q61442|Q61442_MOUSE C-AMP-responsive-element binding protein omega OS=Mus musculus GN=CREB PE=4 SV=1;tr|A0A087WRI6|A0A087WRI6_MOUSE Cyclic AMP-resp	6	1	1	1	4.9	30.959		56171000	7224500	10178000	11045000	6125000	5824800	8232600	0	7540600	0
Q61935;A0A087WRZ7;A0A0G2JDM3;Q545G5;E9PWG4;Q6PCW9;A0A0G2JDW2;Q545T7;P05977;P09542	tr|Q61935|Q61935_MOUSE Ventricular alkali myosin light chain (Fragment) OS=Mus musculus GN=Myl3 PE=2 SV=1;tr|A0A087WRZ7|A0A087WRZ7_MOUSE Myosin light chain 1/3, skeletal muscle isoform OS=Mus musculus GN=Myl1 PE=1 SV=1;tr|A0A0G2JDM3|A0A0G2JDM3_MOUSE Myosin	10	1	1	1	20.3	6.5243		368860000	45548000	50627000	35588000	25117000	38084000	40900000	40077000	44850000	48071000
A0A087WS46;O70251;M0QWK5;M0QWH8;G3UX43;G3UZ47	tr|A0A087WS46|A0A087WS46_MOUSE Eukaryotic translation elongation factor 1 beta 2 OS=Mus musculus GN=Eef1b2 PE=1 SV=1;sp|O70251|EF1B_MOUSE Elongation factor 1-beta OS=Mus musculus GN=Eef1b PE=1 SV=5	6	7	6	6	49.5	20.136		405220000	32036000	28791000	40894000	42542000	49335000	57877000	45658000	51298000	56789000
A0A087WS76;A0A140LHL6;E9Q3S4	tr|A0A087WS76|A0A087WS76_MOUSE Mitogen-activated protein kinase kinase kinase 19 (Fragment) OS=Mus musculus GN=Map3k19 PE=4 SV=2;tr|A0A140LHL6|A0A140LHL6_MOUSE Mitogen-activated protein kinase kinase kinase 19 OS=Mus musculus GN=Map3k19 PE=4 SV=1;sp|E9Q3S4	3	1	1	1	0.6	135.87		15914000	3915500	4683500	4495700	0	2819100	0	0	0	0
A0A087WSK7;Q9CQZ0;Q921I0	tr|A0A087WSK7|A0A087WSK7_MOUSE Predicted gene 28778 (Fragment) OS=Mus musculus GN=Gm28778 PE=4 SV=1;sp|Q9CQZ0|ORML2_MOUSE ORM1-like protein 2 OS=Mus musculus GN=Ormdl2 PE=1 SV=1;sp|Q921I0|ORML1_MOUSE ORM1-like protein 1 OS=Mus musculus GN=Ormdl1 PE=2 SV=1	3	1	1	1	6.4	25.715		24173000	2852200	3449400	4542100	1863400	474610	2937400	2389000	2491700	3172900
Q9D323;Q8C497;Q8C3V4;Q3TW11;Q8C8M3;A0A087WSP5;P42225;Q99K94;Q91Y52;Q8CFQ1;A0A087WRI1;A0A087WSQ5	tr|Q9D323|Q9D323_MOUSE Signal transducer and activator of transcription OS=Mus musculus GN=Stat1 PE=2 SV=1;tr|Q8C497|Q8C497_MOUSE Signal transducer and activator of transcription OS=Mus musculus GN=Stat1 PE=2 SV=1;tr|Q8C3V4|Q8C3V4_MOUSE Signal transducer a	12	13	13	13	21	87.28		64506000	7741100	4464600	6345400	7669000	4474100	10523000	7166100	5515800	10608000
A0A087WST2;A0A0R4J2B6;Q8BX09	tr|A0A087WST2|A0A087WST2_MOUSE Retinoblastoma-binding protein 5 OS=Mus musculus GN=Rbbp5 PE=1 SV=1;tr|A0A0R4J2B6|A0A0R4J2B6_MOUSE Retinoblastoma-binding protein 5 OS=Mus musculus GN=Rbbp5 PE=1 SV=1;sp|Q8BX09|RBBP5_MOUSE Retinoblastoma-binding protein 5 OS=	3	1	1	1	2.9	44.763		909880	0	0	909880	0	0	0	0	0	0
A0A0A0MQ76;Q6DFW4;A0A087WSU5;A0A087WSL8;A0A087WQ46;A0A087WP00	tr|A0A0A0MQ76|A0A0A0MQ76_MOUSE Nucleolar protein 58 OS=Mus musculus GN=Nop58 PE=1 SV=1;sp|Q6DFW4|NOP58_MOUSE Nucleolar protein 58 OS=Mus musculus GN=Nop58 PE=1 SV=1;tr|A0A087WSU5|A0A087WSU5_MOUSE Nucleolar protein 58 (Fragment) OS=Mus musculus GN=Nop58 PE=	6	9	9	9	26.4	50.063		74846000	6361900	7203100	6532700	7734000	7420000	10170000	11524000	6946500	10954000
S4R294;S4R2J9;A0A0A0MQ79;Q3TLH4;S4R2E2;S4R298;Q5DTJ4;F8WHT3;Q7TPM1;Q7TSC1;S4R209;G3UX48	tr|S4R294|S4R294_MOUSE Protein PRRC2C OS=Mus musculus GN=Prrc2c PE=1 SV=1;tr|S4R2J9|S4R2J9_MOUSE Protein PRRC2C OS=Mus musculus GN=Prrc2c PE=1 SV=1;tr|A0A0A0MQ79|A0A0A0MQ79_MOUSE Protein PRRC2C OS=Mus musculus GN=Prrc2c PE=1 SV=1;sp|Q3TLH4|PRC2C_MOUSE Prot	12	6	6	6	2.4	298.11		5804100	592150	742820	946440	306360	848860	354720	821940	913560	277230
D3Z0U5;D6RGM7;A0A0E4D027;A0A0E4HJ81;D3Z4J2;A0A0E3WJP9;A0A0E4D014;A0A0E4HEY7;A0A0G2JFY0;A0A0A0MQ80;B7ZNK9;Q9D3R6;Q3UMC0	tr|D3Z0U5|D3Z0U5_MOUSE Katanin p60 ATPase-containing subunit A-like 2 OS=Mus musculus GN=Katnal2 PE=4 SV=1;tr|D6RGM7|D6RGM7_MOUSE Katanin p60 ATPase-containing subunit A-like 2 OS=Mus musculus GN=Katnal2 PE=1 SV=1;tr|A0A0E4D027|A0A0E4D027_MOUSE Katanin p60	13	1	1	1	4.3	31.2		74524000	5902500	8765900	11227000	7749800	7924400	10152000	6434700	9562100	6805200
V9GXE4;A0A0A0MQ89;Q80US4	tr|V9GXE4|V9GXE4_MOUSE Actin-related protein 5 OS=Mus musculus GN=Actr5 PE=1 SV=1;tr|A0A0A0MQ89|A0A0A0MQ89_MOUSE Actin-related protein 5 OS=Mus musculus GN=Actr5 PE=1 SV=1;sp|Q80US4|ARP5_MOUSE Actin-related protein 5 OS=Mus musculus GN=Actr5 PE=1 SV=3	3	1	1	1	4.5	45.23		512620	0	210730	301890	0	0	0	0	0	0
Q545H7;A0A0A0MQ90;P97352	tr|Q545H7|Q545H7_MOUSE S100 calcium binding protein A13 OS=Mus musculus GN=S100a13 PE=2 SV=1;tr|A0A0A0MQ90|A0A0A0MQ90_MOUSE Protein S100-A13 OS=Mus musculus GN=S100a13 PE=1 SV=1;sp|P97352|S10AD_MOUSE Protein S100-A13 OS=Mus musculus GN=S100a13 PE=1 SV=1	3	3	3	3	29.6	11.158		95403000	23328000	3637200	2911400	10553000	14759000	15505000	7131200	10719000	6858300
A0A0R4J0X5;A0A0A0MQA3;Q00896;P07758;Q91X22;Q3KQQ4;Q00897;P22599;Q00898	tr|A0A0R4J0X5|A0A0R4J0X5_MOUSE Alpha-1-antitrypsin 1-3 OS=Mus musculus GN=Serpina1c PE=1 SV=1;tr|A0A0A0MQA3|A0A0A0MQA3_MOUSE Alpha-1-antitrypsin 1-1 OS=Mus musculus GN=Serpina1a PE=1 SV=1;sp|Q00896|A1AT3_MOUSE Alpha-1-antitrypsin 1-3 OS=Mus musculus GN=Ser	9	5	5	5	13.1	45.854		56349000	8182100	8877400	10445000	3465500	3958000	4316300	3270300	4756500	9078100
A0A0A0MQA5;P68368;A0A087WQS4;A0A087WRB4;A0A087WSB0;A0A087WSL5;A0A087WS35	tr|A0A0A0MQA5|A0A0A0MQA5_MOUSE Tubulin alpha chain (Fragment) OS=Mus musculus GN=Tuba4a PE=1 SV=1;sp|P68368|TBA4A_MOUSE Tubulin alpha-4A chain OS=Mus musculus GN=Tuba4a PE=1 SV=1	7	19	4	4	50.7	52.793		215140000	24479000	20220000	25411000	20079000	23295000	28922000	22316000	24448000	25975000
D2KHZ9;A0A0A0MQF6;P16858;S4R1W1;A0A1D5RLD8;S4R257;Q3TUZ9;Q4VBD1;W8QM43;Q8CEV2;V9GX06;Q2VWQ4;S4R1W8;S4R1N5;Q6IWE3;V9GXA7;Q3V2I5;A0A0R4J0X7;S4R2G5;Q64467;V9GXK0;Q8BJ40	tr|D2KHZ9|D2KHZ9_MOUSE Glyceraldehyde-3-phosphate dehydrogenase OS=Mus musculus GN=GAPDH PE=2 SV=1;tr|A0A0A0MQF6|A0A0A0MQF6_MOUSE Glyceraldehyde-3-phosphate dehydrogenase OS=Mus musculus GN=Gapdh PE=1 SV=1;sp|P16858|G3P_MOUSE Glyceraldehyde-3-phosphate deh	22	16	16	16	63.4	35.81		8253000000	733570000	806300000	1063100000	785240000	817440000	1198100000	915060000	953770000	980430000
A0A0A0MQN1;Q5RL79	tr|A0A0A0MQN1|A0A0A0MQN1_MOUSE Keratinocyte associated protein 2, isoform CRA_c OS=Mus musculus GN=Krtcap2 PE=1 SV=1;sp|Q5RL79|KTAP2_MOUSE Keratinocyte-associated protein 2 OS=Mus musculus GN=Krtcap2 PE=1 SV=2	2	1	1	1	14.9	12.542		83104000	5198300	12658000	17699000	4913400	5508900	6185800	10432000	8696200	11812000
Q3TAB9;A0A0A0MQN4;Q9D906;S4R2D5;Q3TM87;S4R2T5;S4R2P7;S4R1T0;S4R1N8	tr|Q3TAB9|Q3TAB9_MOUSE Uncharacterized protein OS=Mus musculus GN=Atg7 PE=2 SV=1;tr|A0A0A0MQN4|A0A0A0MQN4_MOUSE Ubiquitin-like modifier-activating enzyme ATG7 OS=Mus musculus GN=Atg7 PE=1 SV=1;sp|Q9D906|ATG7_MOUSE Ubiquitin-like modifier-activating enzyme	9	12	12	12	24.9	77.5		43317000	4949800	3049000	3738000	5180700	3305400	7638000	4768100	6262400	4425900
A0A0A1HAM8;P26645;Q05BL6	tr|A0A0A1HAM8|A0A0A1HAM8_MOUSE 80K protein OS=Mus musculus GN=Marcks PE=2 SV=1;sp|P26645|MARCS_MOUSE Myristoylated alanine-rich C-kinase substrate OS=Mus musculus GN=Marcks PE=1 SV=2;tr|Q05BL6|Q05BL6_MOUSE Marcks protein (Fragment) OS=Mus musculus GN=Marck	3	2	2	2	8.4	29.721		23760000	1083300	1560100	4095600	0	4878600	1847300	4088700	3478000	2728800
Q3V4A0;A0A0A6YVS2;Q921L3	tr|Q3V4A0|Q3V4A0_MOUSE Uncharacterized protein (Fragment) OS=Mus musculus GN=Tmco1 PE=2 SV=1;tr|A0A0A6YVS2|A0A0A6YVS2_MOUSE Calcium load-activated calcium channel (Fragment) OS=Mus musculus GN=Tmco1 PE=1 SV=1;sp|Q921L3|TMCO1_MOUSE Calcium load-activated ca	3	2	2	2	11	22.34		9244300	0	2990900	6253400	0	0	0	0	0	0
A0A0A6YVU8;Q9JKV1;Q8VCI8;D3YUD8;A0A1S6GWG3	tr|A0A0A6YVU8|A0A0A6YVU8_MOUSE MCG119397 OS=Mus musculus GN=Gm9774 PE=4 SV=1;sp|Q9JKV1|ADRM1_MOUSE Proteasomal ubiquitin receptor ADRM1 OS=Mus musculus GN=Adrm1 PE=1 SV=2;tr|Q8VCI8|Q8VCI8_MOUSE Adrm1 protein OS=Mus musculus GN=Adrm1 PE=2 SV=1;tr|D3YUD8|D3Y	5	3	3	3	9.6	42.147		52002000	6913300	8641900	6413400	3977800	4940300	5561800	5767600	6428000	3357800
Q45FE3;A0A0A6YVV6;Q45FE4;Q45FE5;Q45FE1;Q45FE2;Q80XD3;A0A0A6YW36;O54829	tr|Q45FE3|Q45FE3_MOUSE Regulator of G-protein signaling 7 isoform C (Fragment) OS=Mus musculus GN=Rgs7 PE=2 SV=1;tr|A0A0A6YVV6|A0A0A6YVV6_MOUSE Regulator of G-protein-signaling 7 (Fragment) OS=Mus musculus GN=Rgs7 PE=1 SV=1;tr|Q45FE4|Q45FE4_MOUSE Regulator	9	1	1	1	12.7	8.2592		39210000	0	0	0	5114100	8809900	6896400	7228600	6021800	5139400
Q921M8;A0A0A6YW28;Q3TEX8;P35123;Q3TPN5;A0A0A6YVY7;Q5DTK8;Q6NXV6;A0A0A6YWM7;Q3TQZ9	tr|Q921M8|Q921M8_MOUSE Usp4 protein OS=Mus musculus GN=Usp4 PE=2 SV=1;tr|A0A0A6YW28|A0A0A6YW28_MOUSE Ubiquitin carboxyl-terminal hydrolase 4 OS=Mus musculus GN=Usp4 PE=1 SV=1;tr|Q3TEX8|Q3TEX8_MOUSE Uncharacterized protein OS=Mus musculus GN=Usp4 PE=2 SV=1;	10	7	7	6	11.1	103.75		13590000	1534700	598160	90760	1345400	1016000	2016000	2810600	1850100	2328500
A0A0A6YW80;G3X8Y3;Q80UM3;Q8K2S4;A0A0A6YX86	tr|A0A0A6YW80|A0A0A6YW80_MOUSE N-alpha-acetyltransferase 15, NatA auxiliary subunit OS=Mus musculus GN=Naa15 PE=1 SV=1;tr|G3X8Y3|G3X8Y3_MOUSE N-alpha-acetyltransferase 15, NatA auxiliary subunit OS=Mus musculus GN=Naa15 PE=1 SV=1;sp|Q80UM3|NAA15_MOUSE N-al	5	5	5	5	5.5	95.295		16846000	1696800	2318600	2612200	1375500	1939700	2186800	1815800	1650100	1250800
A0A0A6YWM5;E9QKE4;Q8BMG7;Q8BYZ6;Q3UEY3	tr|A0A0A6YWM5|A0A0A6YWM5_MOUSE Rab3 GTPase-activating protein non-catalytic subunit OS=Mus musculus GN=Rab3gap2 PE=1 SV=1;tr|E9QKE4|E9QKE4_MOUSE Rab3 GTPase-activating protein non-catalytic subunit OS=Mus musculus GN=Rab3gap2 PE=1 SV=1;sp|Q8BMG7|RBGPR_MOUS	5	2	2	2	1.7	152.54		1658900	99226	187310	134250	169800	283240	0	0	395660	389360
A0A0A6YX02;Q9CQ22	tr|A0A0A6YX02|A0A0A6YX02_MOUSE Ragulator complex protein LAMTOR1 OS=Mus musculus GN=Lamtor1 PE=1 SV=1;sp|Q9CQ22|LTOR1_MOUSE Ragulator complex protein LAMTOR1 OS=Mus musculus GN=Lamtor1 PE=1 SV=1	2	2	2	2	16.9	15.738		200000000	163050000	5119100	6774000	1207700	845070	8161200	0	3389200	11458000
A0A0A6YX18;Q8BVE3;A0A0A6YWP6	tr|A0A0A6YX18|A0A0A6YX18_MOUSE V-type proton ATPase subunit H OS=Mus musculus GN=Atp6v1h PE=1 SV=1;sp|Q8BVE3|VATH_MOUSE V-type proton ATPase subunit H OS=Mus musculus GN=Atp6v1h PE=1 SV=1;tr|A0A0A6YWP6|A0A0A6YWP6_MOUSE V-type proton ATPase subunit H OS=Mus	3	5	5	5	17	54.108		31334000	3736700	2426800	1738000	4782300	1882200	4924600	4571100	4012400	3260000
F6QN75;Q05CD1;A0A0A6YX25;D3Z4P2;P59481	tr|F6QN75|F6QN75_MOUSE VIP36-like protein (Fragment) OS=Mus musculus GN=Lman2l PE=1 SV=1;tr|Q05CD1|Q05CD1_MOUSE Lman2l protein OS=Mus musculus GN=Lman2l PE=2 SV=1;tr|A0A0A6YX25|A0A0A6YX25_MOUSE VIP36-like protein (Fragment) OS=Mus musculus GN=Lman2l PE=1 S	5	1	1	1	8.9	14.273		13021000	1275300	1132300	1223100	1279200	748240	1588600	2467800	1804700	1501900
Q9CY93;Q5M9K9;A0A0A6YX26;P62900;A0A0A6YXL3;Q58DZ1	tr|Q9CY93|Q9CY93_MOUSE Uncharacterized protein OS=Mus musculus GN=Rpl31 PE=2 SV=1;tr|Q5M9K9|Q5M9K9_MOUSE MCG126194, isoform CRA_a OS=Mus musculus GN=Rpl31 PE=1 SV=1;tr|A0A0A6YX26|A0A0A6YX26_MOUSE 60S ribosomal protein L31 OS=Mus musculus GN=Rpl31 PE=1 SV=1	6	3	3	3	24.8	14.411		601390000	51281000	79941000	83302000	61842000	62543000	70290000	58154000	66803000	67233000
A0A0A6YXE3;Q8CAQ1;G3X9Q0;Q8CHF5;Q9JKP5;A0A0A6YXP3;Q4VA08;Q3U581;A0A0A6YWB0;D0EX61;A0A0A6YVV8;Q8C181	tr|A0A0A6YXE3|A0A0A6YXE3_MOUSE Muscleblind-like protein 1 OS=Mus musculus GN=Mbnl1 PE=1 SV=1;tr|Q8CAQ1|Q8CAQ1_MOUSE Muscleblind-like 1 (Drosophila), isoform CRA_e OS=Mus musculus GN=Mbnl1 PE=2 SV=1;tr|G3X9Q0|G3X9Q0_MOUSE Muscleblind-like 1 (Drosophila), is	12	2	2	2	13.9	33.05		47837000	6913200	7789500	10464000	0	0	7659500	7886400	0	7124600
Q8R0G3;Q5FWX7;E9Q6C1;F6UHR6;E9PXZ2;A0A0A6YXH3;A0A1S6GWJ0;A2A8Z1	tr|Q8R0G3|Q8R0G3_MOUSE Oxysterol-binding protein OS=Mus musculus GN=Osbpl9 PE=2 SV=1;tr|Q5FWX7|Q5FWX7_MOUSE Oxysterol-binding protein OS=Mus musculus GN=Osbpl9 PE=1 SV=1;tr|E9Q6C1|E9Q6C1_MOUSE Oxysterol-binding protein OS=Mus musculus GN=Osbpl9 PE=1 SV=1;t	8	1	1	1	1.8	63.91		3476600	0	0	0	490600	549450	672680	583660	647820	532420
D3Z5Y5;D3YX12;A0A0A6YXR0;Q8BGS7	tr|D3Z5Y5|D3Z5Y5_MOUSE Choline/ethanolaminephosphotransferase 1 (Fragment) OS=Mus musculus GN=Cept1 PE=1 SV=1;tr|D3YX12|D3YX12_MOUSE Choline/ethanolaminephosphotransferase 1 (Fragment) OS=Mus musculus GN=Cept1 PE=1 SV=1;tr|A0A0A6YXR0|A0A0A6YXR0_MOUSE Choli	4	1	1	1	18.3	6.7426		94808000	9374400	2695500	3188600	10338000	10514000	13553000	17829000	11740000	15575000
A0A0A6YXS5;B7ZMQ9;F6R4N2;A0A0R4J0Q2;Q0VBQ7;E9QAD0;Q3UEQ1;E9Q9A0;F6V2U0;D3YUD3;D3YUL8;D3Z230	tr|A0A0A6YXS5|A0A0A6YXS5_MOUSE Type I inositol 3,4-bisphosphate 4-phosphatase OS=Mus musculus GN=Inpp4a PE=1 SV=1;tr|B7ZMQ9|B7ZMQ9_MOUSE Inpp4a protein OS=Mus musculus GN=Inpp4a PE=2 SV=1;tr|F6R4N2|F6R4N2_MOUSE Type I inositol 3,4-bisphosphate 4-phosphatas	12	1	1	1	4.2	34.222		7687300	699840	241960	0	804850	945830	1382200	1236400	1057000	1319200
A7UAK4;A0A0A6YY64;Q8BVM1;A2AUP3;A2AUP5;Q9ESY2;A2AUP1;Q7TS91;A2AUP4;A7UAK8;Q3U3S6;A7UAK5;Q8CDS6;B2Z893;B2Z892;Q6GTL7;A0A087WRG0;A0A087WRM7;P70265;Q3UU45;B2Z891;A0A0A6YW89;B2Z894	tr|A7UAK4|A7UAK4_MOUSE 6-phosphofructo-2-kinase/fructose-2, 6-biphosphatase 3 splice variant 1 OS=Mus musculus GN=Pfkfb3 PE=1 SV=1;tr|A0A0A6YY64|A0A0A6YY64_MOUSE 6-phosphofructo-2-kinase/fructose-2,6-biphosphatase 3 OS=Mus musculus GN=Pfkfb3 PE=1 SV=1;tr|Q	23	4	2	2	8.9	53.48		4479100	0	566700	553980	562240	473160	905090	189200	611960	616740
A0A0A6YY87;Q8BH58	tr|A0A0A6YY87|A0A0A6YY87_MOUSE TIP41-like protein (Fragment) OS=Mus musculus GN=Tiprl PE=1 SV=1;sp|Q8BH58|TIPRL_MOUSE TIP41-like protein OS=Mus musculus GN=Tiprl PE=1 SV=1	2	1	1	1	23.4	5.4931		13268000	3325700	0	0	2635200	0	4080600	0	3226100	0
A0A0B4J1E2;Q9CSN1;Q3TM37;Q80VH1;Q9CV75	tr|A0A0B4J1E2|A0A0B4J1E2_MOUSE SNW domain-containing protein 1 OS=Mus musculus GN=Snw1 PE=1 SV=1;sp|Q9CSN1|SNW1_MOUSE SNW domain-containing protein 1 OS=Mus musculus GN=Snw1 PE=1 SV=3;tr|Q3TM37|Q3TM37_MOUSE Uncharacterized protein (Fragment) OS=Mus musculu	5	4	4	4	9	61.461		17918000	1966700	2194800	4032900	1236500	1487400	639950	3153000	1680100	1526500
Q4FJX1;Q3UGH8;A0A0B4J1E7;O35343;D3YTN1	tr|Q4FJX1|Q4FJX1_MOUSE Importin subunit alpha OS=Mus musculus GN=Kpna4 PE=1 SV=1;tr|Q3UGH8|Q3UGH8_MOUSE Uncharacterized protein (Fragment) OS=Mus musculus GN=Kpna4 PE=2 SV=1;tr|A0A0B4J1E7|A0A0B4J1E7_MOUSE Importin subunit alpha-3 OS=Mus musculus GN=Kpna4 P	5	3	2	2	9	57.922		4053800	0	0	0	619250	1100000	617150	832920	603540	280890
Q8C3K1;A0A0G2JE50;A0A0R4J0B0;Q8CDK8;A0A0G2JDH9;Q8R056;G3X9J8;G5E8G5;O54990	tr|Q8C3K1|Q8C3K1_MOUSE Uncharacterized protein OS=Mus musculus GN=Prom1 PE=2 SV=1;tr|A0A0G2JE50|A0A0G2JE50_MOUSE Prominin-1 OS=Mus musculus GN=Prom1 PE=1 SV=1;tr|A0A0R4J0B0|A0A0R4J0B0_MOUSE Prominin-1 OS=Mus musculus GN=Prom1 PE=1 SV=1;tr|Q8CDK8|Q8CDK8_MOU	9	1	1	1	4.2	29.143		2161100	622240	385690	409690	0	0	0	0	0	743450
A0A0G2JDI4;H3BJA3;Q4FJZ6;Q3T9P2;O09172	tr|A0A0G2JDI4|A0A0G2JDI4_MOUSE Glutamate--cysteine ligase regulatory subunit (Fragment) OS=Mus musculus GN=Gclm PE=1 SV=1;tr|H3BJA3|H3BJA3_MOUSE Glutamate--cysteine ligase regulatory subunit (Fragment) OS=Mus musculus GN=Gclm PE=1 SV=1;tr|Q4FJZ6|Q4FJZ6_MOU	5	1	1	1	15.3	10.778		30610000	3009000	0	2058200	5154400	4069200	5514400	0	0	10805000
A0A0G2JDI9;Q9DBZ6;Q91VT3;Q3UNS0;Q3U645;P55096	tr|A0A0G2JDI9|A0A0G2JDI9_MOUSE ATP-binding cassette sub-family D member 3 OS=Mus musculus GN=Abcd3 PE=1 SV=1;tr|Q9DBZ6|Q9DBZ6_MOUSE Uncharacterized protein OS=Mus musculus GN=Abcd3 PE=2 SV=1;tr|Q91VT3|Q91VT3_MOUSE ATP-binding cassette, sub-family D (ALD),	6	1	1	1	2.6	62.697		2898600	505900	467950	482340	0	0	0	0	0	1442400
A0A0G2JDL1;D3YVW6;D3YUH5;Q61107	tr|A0A0G2JDL1|A0A0G2JDL1_MOUSE Guanylate-binding protein 3 (Fragment) OS=Mus musculus GN=Gbp3 PE=1 SV=1;tr|D3YVW6|D3YVW6_MOUSE Guanylate-binding protein 3 (Fragment) OS=Mus musculus GN=Gbp3 PE=1 SV=1;tr|D3YUH5|D3YUH5_MOUSE Guanylate-binding protein 3 (Frag	4	1	1	1	21.1	6.4616		7461000	0	0	0	0	0	2760400	0	1904500	2796100
A0A0G2JEA2;A0A0G2JDN9;A0A1B0GXL7;A0A0G2JDM0;A0A140T8R8;A0A0G2JGV7;Q3UT23;Q99NE7;Q3TMV8;A0A1Y7VP24;Q9QZ73	tr|A0A0G2JEA2|A0A0G2JEA2_MOUSE DCN1-like protein OS=Mus musculus GN=Dcun1d1 PE=1 SV=1;tr|A0A0G2JDN9|A0A0G2JDN9_MOUSE DCN1-like protein (Fragment) OS=Mus musculus GN=Dcun1d1 PE=1 SV=4;tr|A0A1B0GXL7|A0A1B0GXL7_MOUSE DCN1-like protein (Fragment) OS=Mus muscul	11	2	2	2	31.2	10.917		29609000	2431700	0	3386200	3882500	2409300	5451500	0	5186900	6860500
Q8BJ53;Q812D4;A0A0H2UH17;Q812D5;A0A0G2JDV6;Q80X50;A0A0G2JE24;A0A0G2JDT1;A0A0G2JGD0;A0A0G2JG47;Q8BZ69;Q80U73;A0A0G2JFN7;Q3TSB0	tr|Q8BJ53|Q8BJ53_MOUSE Uncharacterized protein OS=Mus musculus GN=Ubap2l PE=2 SV=1;tr|Q812D4|Q812D4_MOUSE Lingerer protein-2b OS=Mus musculus GN=Ubap2l PE=2 SV=1;tr|A0A0H2UH17|A0A0H2UH17_MOUSE Ubiquitin associated protein 2-like, isoform CRA_b OS=Mus muscu	14	7	7	7	10.9	103.95		34760000	3143200	3893300	3327400	3057300	4525800	4830100	3641100	3962400	4379800
A0A0G2JDV9	tr|A0A0G2JDV9|A0A0G2JDV9_MOUSE Annexin (Fragment) OS=Mus musculus GN=Anxa3 PE=1 SV=1	1	5	1	1	71.8	8.5637		194280000	8658200	12444000	12348000	21271000	26782000	25569000	32863000	24144000	30196000
A0A0G2JDW7;Q6ZWU9;A0A0G2JG29;Q6ZWY3;A0A0G2JEX7;D6RH49;D3YYB0	tr|A0A0G2JDW7|A0A0G2JDW7_MOUSE 40S ribosomal protein S27 (Fragment) OS=Mus musculus GN=Rps27 PE=1 SV=1;sp|Q6ZWU9|RS27_MOUSE 40S ribosomal protein S27 OS=Mus musculus GN=Rps27 PE=1 SV=3;tr|A0A0G2JG29|A0A0G2JG29_MOUSE 40S ribosomal protein S27 OS=Mus musculu	7	3	3	3	39	9.2327		571530000	48756000	52463000	78989000	53082000	32679000	79364000	70460000	55639000	100100000
A0A0G2JE25;A0A0G2JGP4;Q9D091;Q3UCX0;Q3TMF4;Q4FJP3;P08556;Q0VDV7;P32883	tr|A0A0G2JE25|A0A0G2JE25_MOUSE GTPase NRas (Fragment) OS=Mus musculus GN=Nras PE=1 SV=1;tr|A0A0G2JGP4|A0A0G2JGP4_MOUSE GTPase NRas (Fragment) OS=Mus musculus GN=Nras PE=1 SV=1;tr|Q9D091|Q9D091_MOUSE GTPase NRas OS=Mus musculus GN=Nras PE=1 SV=1;tr|Q3UCX0|Q	9	2	2	1	14	16.835		13387000	5113300	2921800	3640700	0	550950	0	1160600	0	0
Q3TCL6;A0A0G2JE26;Q6DFX2	tr|Q3TCL6|Q3TCL6_MOUSE Uncharacterized protein OS=Mus musculus GN=Antxr2 PE=1 SV=1;tr|A0A0G2JE26|A0A0G2JE26_MOUSE Anthrax toxin receptor 2 OS=Mus musculus GN=Antxr2 PE=1 SV=1;sp|Q6DFX2|ANTR2_MOUSE Anthrax toxin receptor 2 OS=Mus musculus GN=Antxr2 PE=1 SV=	3	1	1	1	2.7	53.184		2230500	728210	0	993900	0	0	0	0	0	508430
A0A0G2JE32;Q9D7F5;Q9D1S1;Q4QQL2;Q3U5V6;A0A0G2JGL0;P61079;A0A0G2JF40;Q05CK8;A0A0G2JGZ3;Q3UT95;Q6ZWY6;P62838	tr|A0A0G2JE32|A0A0G2JE32_MOUSE Ubiquitin-conjugating enzyme E2 D3 (Fragment) OS=Mus musculus GN=Ube2d3 PE=1 SV=1;tr|Q9D7F5|Q9D7F5_MOUSE Uncharacterized protein OS=Mus musculus GN=Ube2d3 PE=2 SV=1;tr|Q9D1S1|Q9D1S1_MOUSE Uncharacterized protein OS=Mus muscul	13	2	2	2	13.6	14.731		414600000	50681000	59552000	50511000	43954000	42369000	60121000	11518000	42453000	53445000
Q8R0F1;A0A0G2JE89;Q6DFW5;Q6ZQ17;Q3U2B7	tr|Q8R0F1|Q8R0F1_MOUSE Phospholipid-transporting ATPase (Fragment) OS=Mus musculus GN=Atp11b PE=2 SV=1;tr|A0A0G2JE89|A0A0G2JE89_MOUSE Phospholipid-transporting ATPase (Fragment) OS=Mus musculus GN=Atp11b PE=1 SV=1;tr|Q6DFW5|Q6DFW5_MOUSE Phospholipid-transp	5	3	3	3	7.7	69.751		15105000	608140	435050	713500	555400	2163000	1097300	1012600	4341800	4177900
A0A0G2JEA9;A0A0G2JFX7;A0A0N4SUH6;Q9CWZ3	tr|A0A0G2JEA9|A0A0G2JEA9_MOUSE RNA-binding protein 8A OS=Mus musculus GN=Rbm8a PE=1 SV=1;tr|A0A0G2JFX7|A0A0G2JFX7_MOUSE RNA-binding protein 8A OS=Mus musculus GN=Rbm8a PE=1 SV=1;tr|A0A0N4SUH6|A0A0N4SUH6_MOUSE RNA-binding protein 8A OS=Mus musculus GN=Rbm8a	4	2	2	2	15.2	14.502		82463000	7442200	4442200	8410200	6956200	10536000	18565000	4126100	13956000	8030000
A0A0G2JEC4;Q9JK48	tr|A0A0G2JEC4|A0A0G2JEC4_MOUSE Endophilin-B1 OS=Mus musculus GN=Sh3glb1 PE=1 SV=1;sp|Q9JK48|SHLB1_MOUSE Endophilin-B1 OS=Mus musculus GN=Sh3glb1 PE=1 SV=1	2	2	2	2	7.1	44.303		3525100	0	682210	1438800	419170	296780	385540	0	302700	0
Q6P3B4;A0A0G2JEK2;P63254;Q8C2N7	tr|Q6P3B4|Q6P3B4_MOUSE Cysteine-rich protein 1 (Intestinal) OS=Mus musculus GN=Crip1 PE=2 SV=1;tr|A0A0G2JEK2|A0A0G2JEK2_MOUSE Cysteine-rich protein 1 OS=Mus musculus GN=Crip1 PE=1 SV=1;sp|P63254|CRIP1_MOUSE Cysteine-rich protein 1 OS=Mus musculus GN=Crip1	4	2	2	2	28.6	8.6258		111900000	10506000	5749800	10283000	11727000	1629300	35430000	8244000	7772200	20557000
A0A1L1SVG1;Q8C062;A0A0R4J169;E9QN52;A0A0G2JEP4;A0A0G2JFV5;Q91WK0;A0A0G2JGZ1;A0A1L1SQW1;A0A1L1SSC0	tr|A0A1L1SVG1|A0A1L1SVG1_MOUSE Leucine-rich repeat flightless-interacting protein 2 OS=Mus musculus GN=Lrrfip2 PE=1 SV=1;tr|Q8C062|Q8C062_MOUSE Uncharacterized protein (Fragment) OS=Mus musculus GN=Lrrfip2 PE=2 SV=1;tr|A0A0R4J169|A0A0R4J169_MOUSE Leucine-r	10	3	2	2	9.1	42.382		8796400	0	0	0	1276900	2281500	1204100	774000	549030	2710800
A0A0G2JF25;Q8JZN5	tr|A0A0G2JF25|A0A0G2JF25_MOUSE Acyl-CoA dehydrogenase family member 9, mitochondrial (Fragment) OS=Mus musculus GN=Acad9 PE=1 SV=1;sp|Q8JZN5|ACAD9_MOUSE Acyl-CoA dehydrogenase family member 9, mitochondrial OS=Mus musculus GN=Acad9 PE=1 SV=2	2	1	1	1	9.4	17.658		1890700	0	1890700	0	0	0	0	0	0	0
A0A0G2JF85;Q3UHD6;A0A0G2JGD5	tr|A0A0G2JF85|A0A0G2JF85_MOUSE Sorting nexin-27 OS=Mus musculus GN=Snx27 PE=1 SV=1;sp|Q3UHD6|SNX27_MOUSE Sorting nexin-27 OS=Mus musculus GN=Snx27 PE=1 SV=2	3	3	3	3	7.8	50.777		9933100	603470	626780	2219200	943020	1175600	359380	1327200	1400500	1277900
A0A0G2JFQ4;B7ZWL5;E9Q9L6;B2RXS1;Q6ZQA0;F6VTL9;F6ZZB1;D3Z2K6	tr|A0A0G2JFQ4|A0A0G2JFQ4_MOUSE Neurobeachin-like protein 2 OS=Mus musculus GN=Nbeal2 PE=1 SV=1;tr|B7ZWL5|B7ZWL5_MOUSE Nbeal2 protein OS=Mus musculus GN=Nbeal2 PE=2 SV=1;tr|E9Q9L6|E9Q9L6_MOUSE Neurobeachin-like protein 2 OS=Mus musculus GN=Nbeal2 PE=1 SV=1;	8	13	13	13	6.3	299.04		12801000	5300900	295670	567340	821050	1052600	1346200	1094900	1101100	1221300
Q0P6B2;Q3TUE1;A0A0G2JGW9;A0A0G2JFY5;Q3UUU2;Q91WJ8;A0A0G2JG00;Q3TIS5;A0A0G2JFK2;A0A0G2JE55;A0A0G2JG96;A0A0G2JGT1;A0A0A6YVV5;A2AJ72;Q3ULP9;Q3TIX6	tr|Q0P6B2|Q0P6B2_MOUSE Far upstream element (FUSE) binding protein 1 OS=Mus musculus GN=Fubp1 PE=2 SV=1;tr|Q3TUE1|Q3TUE1_MOUSE Far upstream element-binding protein 1 OS=Mus musculus GN=Fubp1 PE=1 SV=1;tr|A0A0G2JGW9|A0A0G2JGW9_MOUSE Far upstream element-bin	16	10	7	7	17	67.195		39796000	4802200	6721800	6277800	3450700	3167900	3420900	3336700	4499500	4118400
Q8BKH0;A0A0G2JGC8;E9Q6Q4;Q3TU36;Q3TPS9;Q3TA69;E9Q912;A0A0G2JF70;Q3TYN8	tr|Q8BKH0|Q8BKH0_MOUSE Uncharacterized protein OS=Mus musculus PE=2 SV=1;tr|A0A0G2JGC8|A0A0G2JGC8_MOUSE RAP1, GTP-GDP dissociation stimulator 1 OS=Mus musculus GN=Rap1gds1 PE=1 SV=1;tr|E9Q6Q4|E9Q6Q4_MOUSE RAP1, GTP-GDP dissociation stimulator 1 OS=Mus musc	9	2	2	2	5	59.168		251870	0	0	0	0	81801	0	0	91209	78861
A0A0G2JGE0;Q8BXV2	tr|A0A0G2JGE0|A0A0G2JGE0_MOUSE BRI3-binding protein (Fragment) OS=Mus musculus GN=Bri3bp PE=1 SV=1;sp|Q8BXV2|BRI3B_MOUSE BRI3-binding protein OS=Mus musculus GN=Bri3bp PE=1 SV=1	2	1	1	1	12.7	16.304		39987000	3231700	1376400	0	3253100	4684100	6832400	6396500	4936900	9276500
A0A0G2JGI9;F8VPN4;F6XXE6;F7CSZ6;E0CYU6	tr|A0A0G2JGI9|A0A0G2JGI9_MOUSE Amylo-1,6-glucosidase, 4-alpha-glucanotransferase OS=Mus musculus GN=Agl PE=1 SV=1;tr|F8VPN4|F8VPN4_MOUSE Amylo-1,6-glucosidase, 4-alpha-glucanotransferase OS=Mus musculus GN=Agl PE=1 SV=1;tr|F6XXE6|F6XXE6_MOUSE Amylo-1,6-glu	5	8	8	8	7.5	145.13		6477400	454070	722280	334900	802090	1163400	1222500	791250	339550	647390
A0A0G2JGK6;P25799	tr|A0A0G2JGK6|A0A0G2JGK6_MOUSE Nuclear factor NF-kappa-B p105 subunit OS=Mus musculus GN=Nfkb1 PE=1 SV=1;sp|P25799|NFKB1_MOUSE Nuclear factor NF-kappa-B p105 subunit OS=Mus musculus GN=Nfkb1 PE=1 SV=2	2	1	1	1	14.1	14.438		14657000	2637100	2603900	3360600	0	0	3269900	0	2785200	0
A0A0G2JGT5;A0A0G2JH04;Q3TK95;P63073;A0A0G2JFB4;Q8C470;A0A0G2JG98	tr|A0A0G2JGT5|A0A0G2JGT5_MOUSE Eukaryotic translation initiation factor 4E (Fragment) OS=Mus musculus GN=Eif4e PE=1 SV=1;tr|A0A0G2JH04|A0A0G2JH04_MOUSE Eukaryotic translation initiation factor 4E OS=Mus musculus GN=Eif4e PE=1 SV=1;tr|Q3TK95|Q3TK95_MOUSE Un	7	3	3	3	18.6	21.371		9175900	0	0	0	1765500	0	3979600	1599200	0	1831600
A0A0G2JGX3;Q5I0W0;Q3UF04;Q3TJD4;Q9CQQ7	tr|A0A0G2JGX3|A0A0G2JGX3_MOUSE ATP synthase F(0) complex subunit B1, mitochondrial (Fragment) OS=Mus musculus GN=Atp5f1 PE=1 SV=1;tr|Q5I0W0|Q5I0W0_MOUSE ATP synthase, H+ transporting, mitochondrial F0 complex, subunit b, isoform 1 OS=Mus musculus GN=Atp5f1	5	3	3	3	23.8	13.804		190880000	25132000	30558000	14259000	23506000	10207000	12801000	11294000	28955000	34164000
A0A0G2JGY0;D3YWR7;Q8BVI4;D3Z1A1;A0A0G2JGJ1	tr|A0A0G2JGY0|A0A0G2JGY0_MOUSE Dihydropteridine reductase OS=Mus musculus GN=Qdpr PE=1 SV=1;tr|D3YWR7|D3YWR7_MOUSE Dihydropteridine reductase OS=Mus musculus GN=Qdpr PE=1 SV=1;sp|Q8BVI4|DHPR_MOUSE Dihydropteridine reductase OS=Mus musculus GN=Qdpr PE=1 SV=	5	2	2	2	25.2	14.821		11326000	0	0	5506400	0	0	0	1798900	4021200	0
K3W4P2;A0A0G2JH17;Q6P4S8;A0A0G2JFR3;Q0KK53	tr|K3W4P2|K3W4P2_MOUSE Integrator complex subunit 1 OS=Mus musculus GN=Ints1 PE=1 SV=2;tr|A0A0G2JH17|A0A0G2JH17_MOUSE Integrator complex subunit 1 OS=Mus musculus GN=Ints1 PE=1 SV=1;sp|Q6P4S8|INT1_MOUSE Integrator complex subunit 1 OS=Mus musculus GN=Ints1	5	2	2	2	1.2	247.71		342710	0	0	0	31842	33327	35362	113420	31283	97481
A0A0J9YTV6;A0A0J9YUK7;Q9CRD0	tr|A0A0J9YTV6|A0A0J9YTV6_MOUSE OCIA domain-containing protein 1 (Fragment) OS=Mus musculus GN=Ociad1 PE=1 SV=1;tr|A0A0J9YUK7|A0A0J9YUK7_MOUSE OCIA domain-containing protein 1 OS=Mus musculus GN=Ociad1 PE=1 SV=1;sp|Q9CRD0|OCAD1_MOUSE OCIA domain-containing	3	1	1	1	72	2.4589		110310000	0	0	0	14966000	10392000	21661000	30003000	7859500	25430000
A0A0J9YTY0;A0A0J9YUL3;Q8C1B7;A0A0J9YUV6	tr|A0A0J9YTY0|A0A0J9YTY0_MOUSE Septin-11 OS=Mus musculus GN=Sept11 PE=1 SV=1;tr|A0A0J9YUL3|A0A0J9YUL3_MOUSE Septin 11, isoform CRA_b OS=Mus musculus GN=Sept11 PE=1 SV=1;sp|Q8C1B7|SEP11_MOUSE Septin-11 OS=Mus musculus GN=Sept11 PE=1 SV=4	4	8	4	4	23.3	48.978		14375000	1400400	2281400	2668300	0	1186000	1111200	1725400	982260	3019900
A0A0J9YU05	tr|A0A0J9YU05|A0A0J9YU05_MOUSE WD repeat-containing protein 1 OS=Mus musculus GN=Wdr1 PE=1 SV=1	1	9	1	1	30.9	36.414		4920100	0	772320	0	1913500	2234300	0	0	0	0
A0A0J9YU62;O88712;A0A0J9YUM4;A0A0J9YTW3;A0A0J9YUR5;A0A0J9YU66;A0A0J9YVI3	tr|A0A0J9YU62|A0A0J9YU62_MOUSE C-terminal-binding protein 1 OS=Mus musculus GN=Ctbp1 PE=1 SV=1;sp|O88712|CTBP1_MOUSE C-terminal-binding protein 1 OS=Mus musculus GN=Ctbp1 PE=1 SV=2;tr|A0A0J9YUM4|A0A0J9YUM4_MOUSE C-terminal-binding protein 1 OS=Mus musculus	7	8	8	6	25.9	46.527		95880000	7286300	7030800	12129000	11686000	6443800	15443000	11270000	11986000	12606000
A0A0J9YU83;F7BJB9	tr|A0A0J9YU83|A0A0J9YU83_MOUSE MORC family CW-type zinc finger protein 3 OS=Mus musculus GN=Morc3 PE=1 SV=1;sp|F7BJB9|MORC3_MOUSE MORC family CW-type zinc finger protein 3 OS=Mus musculus GN=Morc3 PE=1 SV=1	2	1	1	1	1.7	98.509		0	0	0	0	0	0	0	0	0	0
A0A0J9YUD8;Q8C7C4;Q8BNM0;A0A0J9YUZ4;Q8BQ02;Q6P202;Q58EV5;Q497Z6;Q3UBK2;P63158;Q3UJK0;D3YZ18;D3YVC6;Q8CH24;Q80YZ1	tr|A0A0J9YUD8|A0A0J9YUD8_MOUSE High mobility group protein B1 OS=Mus musculus GN=Hmgb1 PE=1 SV=1;tr|Q8C7C4|Q8C7C4_MOUSE Uncharacterized protein (Fragment) OS=Mus musculus PE=2 SV=1;tr|Q8BNM0|Q8BNM0_MOUSE Uncharacterized protein (Fragment) OS=Mus musculus P	15	11	10	10	50.3	19.774		5484900000	559180000	436060000	284670000	553410000	450310000	889950000	597600000	762090000	951650000
A0A0J9YUI1;Q6ZWQ6;P61087;Q3TL77;D3Z4U3;A0A0J9YUR9;Q3V3R8;A0A0J9YU07;F8WIC2	tr|A0A0J9YUI1|A0A0J9YUI1_MOUSE Ubiquitin-conjugating enzyme E2 K OS=Mus musculus GN=Ube2k PE=1 SV=1;tr|Q6ZWQ6|Q6ZWQ6_MOUSE Huntingtin interacting protein 2, isoform CRA_e OS=Mus musculus GN=Ube2k PE=1 SV=1;sp|P61087|UBE2K_MOUSE Ubiquitin-conjugating enzyme	9	5	5	5	40.3	15.81		132920000	10589000	17790000	11751000	15029000	12287000	18006000	17599000	17085000	12789000
A0A0J9YV30;A0A0J9YTZ8;A0A0J9YV66	tr|A0A0J9YV30|A0A0J9YV30_MOUSE Paxillin OS=Mus musculus GN=Pxn PE=1 SV=1	3	12	1	1	32.3	46.54		3952500	0	1799100	2153500	0	0	0	0	0	0
A0A0J9YV90;Q8BHJ5;A0A0J9YUE3;Q9QXE7;A0A0J9YVC9;A0A0J9YUR3	tr|A0A0J9YV90|A0A0J9YV90_MOUSE F-box-like/WD repeat-containing protein TBL1XR1 OS=Mus musculus GN=Tbl1xr1 PE=1 SV=1;sp|Q8BHJ5|TBL1R_MOUSE F-box-like/WD repeat-containing protein TBL1XR1 OS=Mus musculus GN=Tbl1xr1 PE=1 SV=1	6	5	5	5	15.6	51.622		20519000	1715000	2188600	2237700	2255400	3332500	2965800	2241600	2270400	1312200
A0A0J9YVG0;Q61074;A0A0J9YUB0	tr|A0A0J9YVG0|A0A0J9YVG0_MOUSE Protein phosphatase 1G OS=Mus musculus GN=Ppm1g PE=1 SV=1;sp|Q61074|PPM1G_MOUSE Protein phosphatase 1G OS=Mus musculus GN=Ppm1g PE=1 SV=3	3	3	3	3	8.3	47.802		12135000	1529600	885350	772880	1714600	1860800	2137200	2128100	429280	677440
D3Z285;A0A0N4SUH8;Q9QZ23	tr|D3Z285|D3Z285_MOUSE NFU1 iron-sulfur cluster scaffold homolog, mitochondrial (Fragment) OS=Mus musculus GN=Nfu1 PE=1 SV=2;tr|A0A0N4SUH8|A0A0N4SUH8_MOUSE NFU1 iron-sulfur cluster scaffold homolog, mitochondrial OS=Mus musculus GN=Nfu1 PE=1 SV=1;sp|Q9QZ23	3	2	2	2	9.8	28.455		3737600	207130	591610	694480	0	0	1040400	0	0	1204000
A0A0N4SV90;A0A0N4SUJ7;A0A0N4SUM8;Q69ZQ2	tr|A0A0N4SV90|A0A0N4SV90_MOUSE Pre-mRNA-splicing factor ISY1 homolog (Fragment) OS=Mus musculus GN=Isy1 PE=4 SV=1;tr|A0A0N4SUJ7|A0A0N4SUJ7_MOUSE Pre-mRNA-splicing factor ISY1 homolog OS=Mus musculus GN=Isy1 PE=4 SV=1;tr|A0A0N4SUM8|A0A0N4SUM8_MOUSE Predicte	4	1	1	1	13.7	10.956		7986500	0	0	1908900	1223200	0	0	2738900	0	2115400
A0A0N4SUM3;Q91V01	tr|A0A0N4SUM3|A0A0N4SUM3_MOUSE Lysophospholipid acyltransferase 5 OS=Mus musculus GN=Lpcat3 PE=1 SV=1;sp|Q91V01|MBOA5_MOUSE Lysophospholipid acyltransferase 5 OS=Mus musculus GN=Lpcat3 PE=1 SV=1	2	1	1	1	13.1	11.278		19926000	1461900	0	0	2094500	2784200	3424800	3570400	2812600	3778100
A0A0N4SUU7	tr|A0A0N4SUU7|A0A0N4SUU7_MOUSE Cilia- and flagella-associated protein 100 OS=Mus musculus GN=Cfap100 PE=4 SV=1	1	1	1	1	23.1	4.4391		10011000000	148940000	0	0	1299600000	2115100000	1766200000	1538200000	1422800000	1720200000
Q8BN64;A0A0N4SUV6;Q3UGH6;Q3TAF0;Q9JHW4;Q499X6;A0A0N4SWD9;A0A0N4SVA4;A0A0N4SUU3	tr|Q8BN64|Q8BN64_MOUSE Uncharacterized protein OS=Mus musculus GN=Eefsec PE=2 SV=1;tr|A0A0N4SUV6|A0A0N4SUV6_MOUSE Selenocysteine-specific elongation factor OS=Mus musculus GN=Eefsec PE=1 SV=1;tr|Q3UGH6|Q3UGH6_MOUSE Uncharacterized protein OS=Mus musculus G	9	4	4	4	7.5	58.02		2978900	312960	844950	291170	110620	652300	459270	0	128400	179260
A0A0N4SUW1;D3Z2H3;Q3TPM3;Q05DR6;Q3UIA5;Q9WTX6	tr|A0A0N4SUW1|A0A0N4SUW1_MOUSE Cullin-1 OS=Mus musculus GN=Cul1 PE=1 SV=1;tr|D3Z2H3|D3Z2H3_MOUSE Cullin-1 (Fragment) OS=Mus musculus GN=Cul1 PE=1 SV=1;tr|Q3TPM3|Q3TPM3_MOUSE Cullin-1 (Fragment) OS=Mus musculus GN=Cul1 PE=1 SV=1;tr|Q05DR6|Q05DR6_MOUSE Cul1	6	1	1	1	23.5	5.9607		0	0	0	0	0	0	0	0	0	0
A0A0N4SUX9;Q9CQ10	tr|A0A0N4SUX9|A0A0N4SUX9_MOUSE Charged multivesicular body protein 3 (Fragment) OS=Mus musculus GN=Chmp3 PE=1 SV=1;sp|Q9CQ10|CHMP3_MOUSE Charged multivesicular body protein 3 OS=Mus musculus GN=Chmp3 PE=1 SV=3	2	1	1	1	9.4	11.129		33430000	4999300	4323600	7126500	3938500	2943700	5496600	0	4601800	0
A0A0N4SV05;A0A0R4J0U2;Q0VGB7;A0A0N4SVH3;A4QMV1	tr|A0A0N4SV05|A0A0N4SV05_MOUSE Serine/threonine-protein phosphatase 4 regulatory subunit 2 (Fragment) OS=Mus musculus GN=Ppp4r2 PE=1 SV=1;tr|A0A0R4J0U2|A0A0R4J0U2_MOUSE Serine/threonine-protein phosphatase 4 regulatory subunit 2 OS=Mus musculus GN=Ppp4r2 P	5	2	2	2	10.9	25.472		5033600	673640	0	870090	816410	637660	1175900	0	859950	0
I6L970;A0A0N4SVA6;Q3TBX5;Q3U3K9;P70295	tr|I6L970|I6L970_MOUSE Aup1 protein OS=Mus musculus GN=Aup1 PE=2 SV=1;tr|A0A0N4SVA6|A0A0N4SVA6_MOUSE Ancient ubiquitous protein 1 (Fragment) OS=Mus musculus GN=Aup1 PE=1 SV=1;tr|Q3TBX5|Q3TBX5_MOUSE MCG133576, isoform CRA_a OS=Mus musculus GN=Aup1 PE=2 SV=1	5	1	1	1	4.6	31.826		7379500	324140	0	0	990240	1076600	1369500	1177800	946100	1495100
Q3UT97;Q3V3E9;Q3U4V8;Q921T5;A0A0N4SVA7;Q3UXZ9	tr|Q3UT97|Q3UT97_MOUSE Uncharacterized protein OS=Mus musculus GN=Kdm5a PE=2 SV=1;tr|Q3V3E9|Q3V3E9_MOUSE Uncharacterized protein (Fragment) OS=Mus musculus GN=Kdm5a PE=2 SV=1;tr|Q3U4V8|Q3U4V8_MOUSE Uncharacterized protein (Fragment) OS=Mus musculus GN=Kdm5	6	1	1	1	6.6	15.791		15790000	3801000	0	0	2842100	0	4646600	0	4500300	0
A0A0N4SVC2;E9QP00;Q3TAP5;Q6PFR5	tr|A0A0N4SVC2|A0A0N4SVC2_MOUSE Transformer-2 protein homolog alpha OS=Mus musculus GN=Tra2a PE=1 SV=1;tr|E9QP00|E9QP00_MOUSE Transformer-2 protein homolog alpha OS=Mus musculus GN=Tra2a PE=1 SV=1;tr|Q3TAP5|Q3TAP5_MOUSE Uncharacterized protein OS=Mus muscul	4	2	2	2	13.2	32.259		25271000	1503900	1379000	1016500	2799600	3332600	5426900	3666900	3786500	2358700
A0A0N4SVH4	tr|A0A0N4SVH4|A0A0N4SVH4_MOUSE Rho GDP-dissociation inhibitor 2 (Fragment) OS=Mus musculus GN=Arhgdib PE=1 SV=1	1	7	2	2	57.3	10.22		230970000	5023100	4587100	1784700	30082000	48561000	36291000	34421000	42078000	28143000
A0A0N4SVK3;P62322	tr|A0A0N4SVK3|A0A0N4SVK3_MOUSE U6 snRNA-associated Sm-like protein LSm5 OS=Mus musculus GN=Lsm5 PE=1 SV=1;sp|P62322|LSM5_MOUSE U6 snRNA-associated Sm-like protein LSm5 OS=Mus musculus GN=Lsm5 PE=3 SV=2	2	1	1	1	32.2	6.6106		60672000	0	10697000	16376000	0	14294000	4188500	15116000	0	0
Z4YKC4;A0A0R4J112;A2AMI2;A0A0N4SVL0;Q80XI3;Q6DI78;A2AMI7;Q3V075	tr|Z4YKC4|Z4YKC4_MOUSE Eukaryotic translation initiation factor 4 gamma 3 OS=Mus musculus GN=Eif4g3 PE=1 SV=1;tr|A0A0R4J112|A0A0R4J112_MOUSE Eukaryotic translation initiation factor 4 gamma 3 OS=Mus musculus GN=Eif4g3 PE=1 SV=1;tr|A2AMI2|A2AMI2_MOUSE Eukar	8	3	2	2	2.1	173.55		2299800	0	0	146860	0	330640	835980	0	986280	0
A0A0N4SVQ1;Q62425	tr|A0A0N4SVQ1|A0A0N4SVQ1_MOUSE Cytochrome c oxidase subunit NDUFA4 OS=Mus musculus GN=Ndufa4 PE=1 SV=1;sp|Q62425|NDUA4_MOUSE Cytochrome c oxidase subunit NDUFA4 OS=Mus musculus GN=Ndufa4 PE=1 SV=2	2	2	2	2	44.9	5.8765		195950000	7921800	1895200	1972900	25074000	31037000	37585000	24016000	25191000	41253000
A0A0N4SVT3;A0A0N4SW28;Q9DAS9	tr|A0A0N4SVT3|A0A0N4SVT3_MOUSE Guanine nucleotide-binding protein subunit gamma (Fragment) OS=Mus musculus GN=Gng12 PE=1 SV=1;tr|A0A0N4SW28|A0A0N4SW28_MOUSE Guanine nucleotide-binding protein subunit gamma OS=Mus musculus GN=Gng12 PE=1 SV=1;sp|Q9DAS9|GBG12	3	4	4	4	73.8	7.1971		421100000	44469000	51003000	30010000	27518000	42623000	54757000	61113000	72195000	37413000
A0A0N4SW78;A0A0U1RPE1;A0A0U1RPD3;Q6NVC2;Q8CII5;D3Z3Y4;Q8BT02;Q921W2;G5E8L2;Q80ZW7;D3Z4H6;Q564E7;Q545C1;P52912;P70318	tr|A0A0N4SW78|A0A0N4SW78_MOUSE Nucleolysin TIA-1 (Fragment) OS=Mus musculus GN=Tia1 PE=1 SV=1;tr|A0A0U1RPE1|A0A0U1RPE1_MOUSE Nucleolysin TIAR (Fragment) OS=Mus musculus GN=Tial1 PE=1 SV=1;tr|A0A0U1RPD3|A0A0U1RPD3_MOUSE Nucleolysin TIAR OS=Mus musculus GN=T	15	1	1	1	12.4	11.676		13078000	0	0	0	0	3243500	0	4502300	0	5332800
A0A0N4SW89;Q7TMN7;P97429;S4R1F2;Q8BSL2;D3Z0S1;A0A0N4SV57;Q9R0V2;F7ANV6	tr|A0A0N4SW89|A0A0N4SW89_MOUSE Annexin (Fragment) OS=Mus musculus GN=Anxa4 PE=1 SV=3;tr|Q7TMN7|Q7TMN7_MOUSE Annexin OS=Mus musculus GN=Anxa4 PE=2 SV=1;sp|P97429|ANXA4_MOUSE Annexin A4 OS=Mus musculus GN=Anxa4 PE=1 SV=4;tr|S4R1F2|S4R1F2_MOUSE Annexin OS=Mus	9	6	6	6	27.5	30.759		26536000	1751000	2731700	4438000	3313800	3204200	4559400	1575500	3407100	1554900
A0A0N4SWB9;Q8K2V2;F8WJ98;Q69ZZ6;Q8CB64	tr|A0A0N4SWB9|A0A0N4SWB9_MOUSE Transmembrane and coiled-coil domains protein 1 OS=Mus musculus GN=Tmcc1 PE=1 SV=1;tr|Q8K2V2|Q8K2V2_MOUSE Tmcc1 protein (Fragment) OS=Mus musculus GN=Tmcc1 PE=2 SV=1;tr|F8WJ98|F8WJ98_MOUSE Transmembrane and coiled-coil domain	5	2	2	2	5.3	52.252		3999300	839260	637410	479600	473950	0	1166000	0	403050	0
A0A0N5E9G7;G3X8Z6;Q5U4B1;G3UWX1;P35601;Q3UVT8;Q3UYI2;Q61944;Q3UJT6	tr|A0A0N5E9G7|A0A0N5E9G7_MOUSE Replication factor C subunit 1 OS=Mus musculus GN=Rfc1 PE=1 SV=1;tr|G3X8Z6|G3X8Z6_MOUSE Replication factor C subunit 1 OS=Mus musculus GN=Rfc1 PE=1 SV=1;tr|Q5U4B1|Q5U4B1_MOUSE Replication factor C subunit 1 OS=Mus musculus GN	9	3	3	3	3.5	125.86		2079700	48334	0	0	294280	417080	520740	291360	199620	308240
A0A0R3P9C8;Q9DC69	tr|A0A0R3P9C8|A0A0R3P9C8_MOUSE NADH dehydrogenase [ubiquinone] 1 alpha subcomplex subunit 9, mitochondrial OS=Mus musculus GN=Ndufa9 PE=1 SV=1;sp|Q9DC69|NDUA9_MOUSE NADH dehydrogenase [ubiquinone] 1 alpha subcomplex subunit 9, mitochondrial OS=Mus musculus	2	3	3	3	8	42.121		7760900	873040	0	0	1066300	1259000	1350700	1726100	799080	686720
A0A0R4IZW8;O88456;A0A0R4J1C2;Q9D7J7	tr|A0A0R4IZW8|A0A0R4IZW8_MOUSE Calpain small subunit 1 OS=Mus musculus GN=Capns1 PE=1 SV=1;sp|O88456|CPNS1_MOUSE Calpain small subunit 1 OS=Mus musculus GN=Capns1 PE=1 SV=1;tr|A0A0R4J1C2|A0A0R4J1C2_MOUSE Calpain small subunit 1 OS=Mus musculus GN=Capns1 PE	4	7	7	7	33.2	28.406		157610000	17833000	15999000	10561000	16183000	15274000	27558000	22768000	10507000	20929000
A0A0R4IZX1;Q8C2K1	tr|A0A0R4IZX1|A0A0R4IZX1_MOUSE Differentially-expressed in FDCP 6 OS=Mus musculus GN=Def6 PE=1 SV=1;sp|Q8C2K1|DEFI6_MOUSE Differentially expressed in FDCP 6 OS=Mus musculus GN=Def6 PE=1 SV=1	2	5	5	5	10	73.452		12813000	766070	978050	854690	1409100	925700	974320	2173500	2231400	2499800
A0A0R4IZY0;Q8C1A5	tr|A0A0R4IZY0|A0A0R4IZY0_MOUSE Thimet oligopeptidase OS=Mus musculus GN=Thop1 PE=1 SV=1;sp|Q8C1A5|THOP1_MOUSE Thimet oligopeptidase OS=Mus musculus GN=Thop1 PE=1 SV=1	2	1	1	1	2.2	78.026		1425800	0	0	0	182490	226790	320240	267070	170850	258350
A0A0R4IZY6;Q61096;B6ZCE5;F6ZK01	tr|A0A0R4IZY6|A0A0R4IZY6_MOUSE Myeloblastin OS=Mus musculus GN=Prtn3 PE=1 SV=1;sp|Q61096|PRTN3_MOUSE Myeloblastin OS=Mus musculus GN=Prtn3 PE=1 SV=2;tr|B6ZCE5|B6ZCE5_MOUSE Proteinase 3 OS=Mus musculus GN=Prtn3 PE=2 SV=1	4	8	8	8	41.3	27.609		4617500000	529930000	544640000	220910000	475500000	380260000	564730000	519720000	618550000	763290000
Q8BQ10;A0A0R4J008;P70288;Q3UXH8	tr|Q8BQ10|Q8BQ10_MOUSE Histone deacetylase 2 OS=Mus musculus GN=Hdac2 PE=1 SV=1;tr|A0A0R4J008|A0A0R4J008_MOUSE Histone deacetylase OS=Mus musculus GN=Hdac2 PE=1 SV=1;sp|P70288|HDAC2_MOUSE Histone deacetylase 2 OS=Mus musculus GN=Hdac2 PE=1 SV=1;tr|Q3UXH8|Q	4	6	6	4	22.4	34.69		101060000	9534200	3481600	4348500	8968800	12200000	15926000	16342000	15588000	14675000
A0A0R4J034;Q99K01	tr|A0A0R4J034|A0A0R4J034_MOUSE MCG129810, isoform CRA_c OS=Mus musculus GN=Pdxdc1 PE=1 SV=1;sp|Q99K01|PDXD1_MOUSE Pyridoxal-dependent decarboxylase domain-containing protein 1 OS=Mus musculus GN=Pdxdc1 PE=1 SV=2	2	2	2	2	3.5	87.479		3447000	323520	434140	771890	194870	355320	320690	512720	183150	350670
D6REI1;D6RGP6;Q3TV90;A0A0R4J047;Q9CYI4	tr|D6REI1|D6REI1_MOUSE Putative RNA-binding protein Luc7-like 1 OS=Mus musculus GN=Luc7l PE=1 SV=1;tr|D6RGP6|D6RGP6_MOUSE Putative RNA-binding protein Luc7-like 1 OS=Mus musculus GN=Luc7l PE=1 SV=1;tr|Q3TV90|Q3TV90_MOUSE Uncharacterized protein (Fragment)	5	1	1	1	15.7	7.7548		16014000	1633900	0	0	1824400	2452100	2331200	2974300	2155300	2642700
A0A0R4J049;Q8CIG8;S4R295;F6QQQ6	tr|A0A0R4J049|A0A0R4J049_MOUSE Protein arginine N-methyltransferase 5 OS=Mus musculus GN=Prmt5 PE=1 SV=1;sp|Q8CIG8|ANM5_MOUSE Protein arginine N-methyltransferase 5 OS=Mus musculus GN=Prmt5 PE=1 SV=3	4	4	4	4	7.7	72.737		14848000	1418800	1550800	1371300	1576700	1684800	1720900	1896200	1847200	1780800
E9Q2H8;E9PYA3;A0A0R4J052;G5E8T9;Q99KB8;D3YWI0	tr|E9Q2H8|E9Q2H8_MOUSE Hydroxyacylglutathione hydrolase, mitochondrial (Fragment) OS=Mus musculus GN=Hagh PE=1 SV=1;tr|E9PYA3|E9PYA3_MOUSE Hydroxyacylglutathione hydrolase, mitochondrial (Fragment) OS=Mus musculus GN=Hagh PE=1 SV=1;tr|A0A0R4J052|A0A0R4J052	6	2	2	2	9.2	23.756		8884000	0	0	1032800	0	2418100	2179100	1598800	1655100	0
A0A0R4J060;J3QNK5;Q8BIH0	tr|A0A0R4J060|A0A0R4J060_MOUSE Histone deacetylase complex subunit SAP130 OS=Mus musculus GN=Sap130 PE=1 SV=1;tr|J3QNK5|J3QNK5_MOUSE Histone deacetylase complex subunit SAP130 OS=Mus musculus GN=Sap130 PE=1 SV=1;sp|Q8BIH0|SP130_MOUSE Histone deacetylase co	3	1	1	1	1.1	111.16		730300	385610	0	344690	0	0	0	0	0	0
A0A0R4J083;P51174	tr|A0A0R4J083|A0A0R4J083_MOUSE Long-chain-specific acyl-CoA dehydrogenase, mitochondrial OS=Mus musculus GN=Acadl PE=1 SV=1;sp|P51174|ACADL_MOUSE Long-chain specific acyl-CoA dehydrogenase, mitochondrial OS=Mus musculus GN=Acadl PE=1 SV=2	2	12	12	12	31.2	47.896		252150000	28070000	22958000	30466000	25834000	23199000	23800000	25223000	38947000	33651000
D6RDT4;A0A0R4J091;Q9JKP7	tr|D6RDT4|D6RDT4_MOUSE DNA polymerase epsilon subunit 3 OS=Mus musculus GN=Pole3 PE=1 SV=1;tr|A0A0R4J091|A0A0R4J091_MOUSE DNA polymerase epsilon subunit 3 OS=Mus musculus GN=Pole3 PE=1 SV=1;sp|Q9JKP7|DPOE3_MOUSE DNA polymerase epsilon subunit 3 OS=Mus musc	3	2	2	2	52.9	5.5854		107420000	6101800	5944300	6483300	3928000	3750000	6723900	18547000	20074000	35868000
A0A0R4J093;Q9DBP5	tr|A0A0R4J093|A0A0R4J093_MOUSE UMP-CMP kinase OS=Mus musculus GN=Cmpk1 PE=1 SV=1;sp|Q9DBP5|KCY_MOUSE UMP-CMP kinase OS=Mus musculus GN=Cmpk1 PE=1 SV=1	2	8	8	8	39.2	25.714		331610000	20707000	77445000	14981000	29493000	17186000	98192000	31572000	30352000	11677000
E9Q9N6;E9PYX3;A0A0R4J227;A0A0R4J0B1;Q3U3A1;Q3T9A3;F6ZS70;E9QMP6;Q571J8;Q05512;F7A3Q3;F6UY70;F6ZEX4;Q5DTG3;Q9JKE5;Q14DQ3;C9K101;A0A1Y7VNZ6;Q03141;Q8VHJ5	tr|E9Q9N6|E9Q9N6_MOUSE Non-specific serine/threonine protein kinase OS=Mus musculus GN=Mark2 PE=1 SV=1;tr|E9PYX3|E9PYX3_MOUSE Non-specific serine/threonine protein kinase OS=Mus musculus GN=Mark2 PE=1 SV=1;tr|A0A0R4J227|A0A0R4J227_MOUSE Non-specific serine	20	2	2	2	4.4	79.091		3718200	162800	398810	578520	262220	330030	847720	808120	0	329920
A0A0R4J0B2;Q8VCI0;A0A0N4SV60	tr|A0A0R4J0B2|A0A0R4J0B2_MOUSE Phospholipase B-like 1 OS=Mus musculus GN=Plbd1 PE=1 SV=1;sp|Q8VCI0|PLBL1_MOUSE Phospholipase B-like 1 OS=Mus musculus GN=Plbd1 PE=1 SV=1	3	11	11	11	21.8	63.018		165060000	17584000	9565500	7339700	12081000	13738000	16570000	20854000	29295000	38035000
A0A0R4J0B4;Q99KK2	tr|A0A0R4J0B4|A0A0R4J0B4_MOUSE Cytidine monophospho-N-acetylneuraminic acid synthetase OS=Mus musculus GN=Cmas PE=1 SV=1;sp|Q99KK2|NEUA_MOUSE N-acylneuraminate cytidylyltransferase OS=Mus musculus GN=Cmas PE=1 SV=2	2	1	1	1	3.7	48.029		15390000	1618400	2422600	3429400	1167500	1624100	1887600	1424500	1815300	0
A0A0R4J0D3;Q3TDQ1	tr|A0A0R4J0D3|A0A0R4J0D3_MOUSE Dolichyl-diphosphooligosaccharide--protein glycosyltransferase subunit STT3B OS=Mus musculus GN=Stt3b PE=1 SV=1;sp|Q3TDQ1|STT3B_MOUSE Dolichyl-diphosphooligosaccharide--protein glycosyltransferase subunit STT3B OS=Mus musculu	2	4	4	4	5.2	93.314		16850000	1529300	825470	1153700	1628800	1720500	3450500	2365600	1676300	2499800
D3Z5I2;A0A0R4J0E0;Q91W78	tr|D3Z5I2|D3Z5I2_MOUSE U6 snRNA phosphodiesterase (Fragment) OS=Mus musculus GN=Usb1 PE=1 SV=1;tr|A0A0R4J0E0|A0A0R4J0E0_MOUSE U6 snRNA phosphodiesterase OS=Mus musculus GN=Usb1 PE=1 SV=1;sp|Q91W78|USB1_MOUSE U6 snRNA phosphodiesterase OS=Mus musculus GN=Us	3	1	1	1	8	13.404		1228800	0	0	0	249080	267260	310860	401570	0	0
A0A0R4J0E4;Q7TQK1	tr|A0A0R4J0E4|A0A0R4J0E4_MOUSE Integrator complex subunit 7 OS=Mus musculus GN=Ints7 PE=1 SV=1;sp|Q7TQK1|INT7_MOUSE Integrator complex subunit 7 OS=Mus musculus GN=Ints7 PE=1 SV=1	2	3	3	3	4	106.87		21534000	835400	48382	69021	1981400	3219000	2476400	4063000	3833600	5007700
A0A0R4J0F9;S4R296;G5E8A0;S4R1M9;Q8CI95	tr|A0A0R4J0F9|A0A0R4J0F9_MOUSE Oxysterol-binding protein OS=Mus musculus GN=Osbpl10 PE=1 SV=1;tr|S4R296|S4R296_MOUSE Oxysterol-binding protein OS=Mus musculus GN=Osbpl10 PE=1 SV=1;tr|G5E8A0|G5E8A0_MOUSE Oxysterol-binding protein OS=Mus musculus GN=Osbpl11	5	1	1	1	1.7	65.8		2816900	292080	0	0	322320	433890	351610	575590	475880	365560
Q8R3X7;Q3TDE6;A0A0R4J0G0;Q8BH04;Q3UGF0;Q3UQD8	tr|Q8R3X7|Q8R3X7_MOUSE Pck2 protein (Fragment) OS=Mus musculus GN=Pck2 PE=2 SV=1;tr|Q3TDE6|Q3TDE6_MOUSE Uncharacterized protein OS=Mus musculus GN=Pck2 PE=2 SV=1;tr|A0A0R4J0G0|A0A0R4J0G0_MOUSE Phosphoenolpyruvate carboxykinase [GTP], mitochondrial OS=Mus m	6	4	4	4	8.2	58.782		11737000	802910	856180	818120	1449500	1298700	1878800	3207400	691990	733220
A0A0R4J0H7;Q8K2Z4	tr|A0A0R4J0H7|A0A0R4J0H7_MOUSE Condensin complex subunit 1 OS=Mus musculus GN=Ncapd2 PE=1 SV=1;sp|Q8K2Z4|CND1_MOUSE Condensin complex subunit 1 OS=Mus musculus GN=Ncapd2 PE=1 SV=2	2	7	7	7	6.4	155.59		5371200	542230	353180	622890	532860	228000	642750	841380	689310	918550
A0A0R4J0I6;Q80XL6;Q7TNH5;F6U473;A0A087WSI8;D3YTQ5	tr|A0A0R4J0I6|A0A0R4J0I6_MOUSE Acyl-CoA dehydrogenase family member 11 OS=Mus musculus GN=Acad11 PE=1 SV=1;sp|Q80XL6|ACD11_MOUSE Acyl-CoA dehydrogenase family member 11 OS=Mus musculus GN=Acad11 PE=1 SV=2;tr|Q7TNH5|Q7TNH5_MOUSE Nephrocystin 3 (Fragment) OS	6	2	2	2	3	87.347		615910	0	0	494240	57253	0	0	0	0	64413
Z4YL78;A0A0R4J0K2;K3W4R5;A2AGT5;Q80U79;Q4V782;Q8K250;Q6PB55	tr|Z4YL78|Z4YL78_MOUSE Cytoskeleton-associated protein 5 OS=Mus musculus GN=Ckap5 PE=1 SV=1;tr|A0A0R4J0K2|A0A0R4J0K2_MOUSE Cytoskeleton-associated protein 5 OS=Mus musculus GN=Ckap5 PE=1 SV=1;tr|K3W4R5|K3W4R5_MOUSE Cytoskeleton-associated protein 5 OS=Mus	8	6	6	6	3.9	218.71		3609900	443370	678550	709050	103660	308720	423100	388810	19253	535420
A0A0R4J0M1;Q8VCN9	tr|A0A0R4J0M1|A0A0R4J0M1_MOUSE Tubulin-specific Chaperone C OS=Mus musculus GN=Tbcc PE=1 SV=1;sp|Q8VCN9|TBCC_MOUSE Tubulin-specific chaperone C OS=Mus musculus GN=Tbcc PE=1 SV=1	2	1	1	1	3.8	38.094		1124400	0	562230	562160	0	0	0	0	0	0
Q3UMT4;Q05DM9;A0A0R4J0M9;Q80T83;Q8CDG3	tr|Q3UMT4|Q3UMT4_MOUSE Uncharacterized protein (Fragment) OS=Mus musculus GN=Vcpip1 PE=2 SV=1;tr|Q05DM9|Q05DM9_MOUSE Vcpip1 protein (Fragment) OS=Mus musculus GN=Vcpip1 PE=2 SV=1;tr|A0A0R4J0M9|A0A0R4J0M9_MOUSE Deubiquitinating protein VCIP135 OS=Mus muscul	5	2	2	2	3.6	80.844		1424100	315120	143630	570240	0	160680	0	0	234380	0
A0A0R4J0N8;P70658	tr|A0A0R4J0N8|A0A0R4J0N8_MOUSE C-X-C chemokine receptor type 4 OS=Mus musculus GN=Cxcr4 PE=1 SV=1;sp|P70658|CXCR4_MOUSE C-X-C chemokine receptor type 4 OS=Mus musculus GN=Cxcr4 PE=1 SV=2	2	1	1	1	3.3	40.412		6057600	0	1490400	1183600	0	885490	0	0	0	2498100
A0A0R4J0P5;P97814	tr|A0A0R4J0P5|A0A0R4J0P5_MOUSE Proline-serine-threonine phosphatase-interacting protein 1 OS=Mus musculus GN=Pstpip1 PE=1 SV=1;sp|P97814|PPIP1_MOUSE Proline-serine-threonine phosphatase-interacting protein 1 OS=Mus musculus GN=Pstpip1 PE=1 SV=1	2	7	7	7	21.9	47.576		60448000	8044600	7680500	8540200	4291100	3611100	9523300	7349200	5792400	5616000
A0A0R4J0R1;O70404;A0A0U1RPE8	tr|A0A0R4J0R1|A0A0R4J0R1_MOUSE Vesicle-associated membrane protein 8 OS=Mus musculus GN=Vamp8 PE=1 SV=1;sp|O70404|VAMP8_MOUSE Vesicle-associated membrane protein 8 OS=Mus musculus GN=Vamp8 PE=1 SV=1;tr|A0A0U1RPE8|A0A0U1RPE8_MOUSE Vesicle-associated membran	3	4	4	4	38.6	11.435		452480000	67937000	25650000	21413000	51477000	24394000	46512000	56110000	67483000	91502000
I3QI48;A0A0R4J0T2;Q504P2;D3YXD8	tr|I3QI48|I3QI48_MOUSE C-type lectin domain family 12 member A (Fragment) OS=Mus musculus GN=Clec12a PE=4 SV=1;tr|A0A0R4J0T2|A0A0R4J0T2_MOUSE C-type lectin domain family 12 member A OS=Mus musculus GN=Clec12a PE=1 SV=1;sp|Q504P2|CL12A_MOUSE C-type lectin d	4	2	2	2	10.4	24.229		7261800	3587200	0	0	0	0	0	1780600	920770	973240
Q05DR8;A0A0R4J0T4;Q5D0E0;O88351;Q3U141	tr|Q05DR8|Q05DR8_MOUSE Ikbkb protein (Fragment) OS=Mus musculus GN=Ikbkb PE=2 SV=1;tr|A0A0R4J0T4|A0A0R4J0T4_MOUSE Inhibitor of nuclear factor kappa-B kinase subunit beta OS=Mus musculus GN=Ikbkb PE=1 SV=1;tr|Q5D0E0|Q5D0E0_MOUSE Ikbkb protein OS=Mus musculu	5	4	4	4	7.4	81.054		4351600	150500	290620	594630	587460	632160	698360	796060	184230	417590
A0A0R4J0V5;O08847;P08775	tr|A0A0R4J0V5|A0A0R4J0V5_MOUSE DNA-directed RNA polymerase subunit OS=Mus musculus GN=Polr2a PE=1 SV=1;tr|O08847|O08847_MOUSE DNA-directed RNA polymerase subunit OS=Mus musculus GN=Polr2a PE=2 SV=1;sp|P08775|RPB1_MOUSE DNA-directed RNA polymerase II subuni	3	3	3	3	3.3	213.48		2815100	389080	257550	330870	55565	52248	291800	254780	520330	662910
A0A0R4J0Z1;P08003	tr|A0A0R4J0Z1|A0A0R4J0Z1_MOUSE Protein disulfide-isomerase A4 OS=Mus musculus GN=Pdia4 PE=1 SV=1;sp|P08003|PDIA4_MOUSE Protein disulfide-isomerase A4 OS=Mus musculus GN=Pdia4 PE=1 SV=3	2	17	17	17	29.3	72.369		200860000	15331000	19837000	21014000	22087000	19318000	28584000	22263000	21032000	31397000
A0A0R4J100;Q8CIM5	tr|A0A0R4J100|A0A0R4J100_MOUSE G-protein-coupled receptor 84 OS=Mus musculus GN=Gpr84 PE=1 SV=1;sp|Q8CIM5|GPR84_MOUSE G-protein coupled receptor 84 OS=Mus musculus GN=Gpr84 PE=1 SV=1	2	1	1	1	3.3	43.731		3299200	0	0	0	0	0	0	1424100	1054700	820420
A0A0R4J107;Q8R146;A0A0A6YXV0	tr|A0A0R4J107|A0A0R4J107_MOUSE Acylamino-acid-releasing enzyme (Fragment) OS=Mus musculus GN=Apeh PE=1 SV=1;sp|Q8R146|APEH_MOUSE Acylamino-acid-releasing enzyme OS=Mus musculus GN=Apeh PE=1 SV=3	3	5	5	5	10.3	79.704		26005000	3216200	1397700	1338200	3132300	2431100	4257300	3604700	3620200	3007100
Q8C9R8;Q8CBI1;A0A0R4J124;O54781;Q3US65;Q684J2;Q0VAW8;Q3UB06;Q9Z0G2;O70551	tr|Q8C9R8|Q8C9R8_MOUSE Uncharacterized protein OS=Mus musculus GN=Srpk2 PE=2 SV=1;tr|Q8CBI1|Q8CBI1_MOUSE Uncharacterized protein (Fragment) OS=Mus musculus GN=Srpk2 PE=2 SV=1;tr|A0A0R4J124|A0A0R4J124_MOUSE SRSF protein kinase 2 OS=Mus musculus GN=Srpk2 PE=	10	2	2	2	11.2	21.44		16699000	1134000	1391300	2347400	0	4677600	1479400	2069600	1274700	2325000
A0A0R4J138;P50429;B2RWQ7;Q32KI9	tr|A0A0R4J138|A0A0R4J138_MOUSE Arylsulfatase B OS=Mus musculus GN=Arsb PE=1 SV=1;sp|P50429|ARSB_MOUSE Arylsulfatase B OS=Mus musculus GN=Arsb PE=1 SV=3;tr|B2RWQ7|B2RWQ7_MOUSE Arsb protein OS=Mus musculus GN=Arsb PE=2 SV=1	4	9	9	9	16.1	59.704		148920000	16747000	15386000	13862000	12826000	7676300	12889000	19976000	20936000	28627000
A0A0R4J150;B9EJ86	tr|A0A0R4J150|A0A0R4J150_MOUSE Oxysterol-binding protein OS=Mus musculus GN=Osbpl8 PE=1 SV=1;sp|B9EJ86|OSBL8_MOUSE Oxysterol-binding protein-related protein 8 OS=Mus musculus GN=Osbpl8 PE=1 SV=1	2	4	4	4	7.6	96.98		8959400	187100	145370	98228	1115200	1346600	1898400	1368200	1218200	1582100
Q8CGJ5;Q8BQ54;Q7TQL1;Q6P8K2;Q3URH5;G3UX35;A0A0R4J170;Q3TKT4;O35845	tr|Q8CGJ5|Q8CGJ5_MOUSE Smarca4 protein (Fragment) OS=Mus musculus GN=Smarca4 PE=2 SV=1;tr|Q8BQ54|Q8BQ54_MOUSE Uncharacterized protein (Fragment) OS=Mus musculus GN=Smarca4 PE=2 SV=1;tr|Q7TQL1|Q7TQL1_MOUSE Smarca4 protein (Fragment) OS=Mus musculus GN=Smarc	9	2	2	2	4.6	59.672		11691000	1725000	593210	1811600	688570	975300	1520800	2119000	1047900	1209100
A0A0R4J177;Q3TVC7	tr|A0A0R4J177|A0A0R4J177_MOUSE Cyclin-D1-binding protein 1 OS=Mus musculus GN=Ccndbp1 PE=1 SV=1;sp|Q3TVC7|CCDB1_MOUSE Cyclin-D1-binding protein 1 OS=Mus musculus GN=Ccndbp1 PE=1 SV=1	2	1	1	1	3.5	41.773		3115700	0	1618000	1497700	0	0	0	0	0	0
F6YB25;A0A0R4J195;Q9CSU0;F7DAY5	tr|F6YB25|F6YB25_MOUSE Regulation of nuclear pre-mRNA domain-containing protein 1B (Fragment) OS=Mus musculus GN=Rprd1b PE=1 SV=1;tr|A0A0R4J195|A0A0R4J195_MOUSE Regulation of nuclear pre-mRNA domain-containing protein 1B OS=Mus musculus GN=Rprd1b PE=1 SV=1	4	2	2	2	14.4	21.99		45291000	4822000	2544600	1888800	4749200	4678500	6456300	7356100	5949800	6845200
A0A0R4J1C8;P31996	tr|A0A0R4J1C8|A0A0R4J1C8_MOUSE Macrosialin OS=Mus musculus GN=Cd68 PE=1 SV=1;sp|P31996|CD68_MOUSE Macrosialin OS=Mus musculus GN=Cd68 PE=1 SV=1	2	1	1	1	2.7	35.927		9114900	610980	1115600	2065300	686610	0	1068800	1157000	842920	1567700
A0A0R4J1D0;P59108;Q3TVB2;Q8QZU9;A0A1D5RLP0;Q5DTH0;Q8BIJ1;Q05D94;Q9D6C8;Q8BRJ6;A0A0R4J0J1;Q3UYN2;Q1RLL3;Q9Z140;Q8BLR2;Q0VE82;Q9DC53;Q8JZW4	tr|A0A0R4J1D0|A0A0R4J1D0_MOUSE Copine-2 OS=Mus musculus GN=Cpne2 PE=1 SV=1;sp|P59108|CPNE2_MOUSE Copine-2 OS=Mus musculus GN=Cpne2 PE=1 SV=1;tr|Q3TVB2|Q3TVB2_MOUSE Uncharacterized protein OS=Mus musculus GN=Cpne2 PE=2 SV=1;tr|Q8QZU9|Q8QZU9_MOUSE Cpne2 prot	18	7	6	6	16.3	60.907		51185000	4287200	4093000	5082900	5013700	6003100	7705500	7042600	6695200	5261600
A0A0R4J1F8;E9QPB3;P59328	tr|A0A0R4J1F8|A0A0R4J1F8_MOUSE WD repeat and HMG-box DNA-binding protein 1 OS=Mus musculus GN=Wdhd1 PE=1 SV=1;tr|E9QPB3|E9QPB3_MOUSE WD repeat and HMG-box DNA-binding protein 1 OS=Mus musculus GN=Wdhd1 PE=1 SV=1;sp|P59328|WDHD1_MOUSE WD repeat and HMG-box	3	3	3	3	2.9	120.34		2140000	389260	560350	739990	0	0	0	321770	0	128620
A0A0R4J1G5;Q91X78	tr|A0A0R4J1G5|A0A0R4J1G5_MOUSE Erlin-1 OS=Mus musculus GN=Erlin1 PE=1 SV=1;sp|Q91X78|ERLN1_MOUSE Erlin-1 OS=Mus musculus GN=Erlin1 PE=1 SV=1	2	4	2	2	12.4	39.182		7819100	978580	0	0	1725100	539210	0	1957000	1316000	1303200
A0A0R4J1I6;Q9QY81;F6XGN0;Q8BPS7;Q8C5C6	tr|A0A0R4J1I6|A0A0R4J1I6_MOUSE Nuclear pore membrane glycoprotein 210 OS=Mus musculus GN=Nup210 PE=1 SV=1;sp|Q9QY81|PO210_MOUSE Nuclear pore membrane glycoprotein 210 OS=Mus musculus GN=Nup210 PE=1 SV=2;tr|F6XGN0|F6XGN0_MOUSE Nuclear pore membrane glycopro	5	17	17	17	11.6	199.48		33568000	3849100	3121400	4047800	3793100	3073200	4133100	4471300	2791000	4287900
A0A0R4J1L2;Q91VK2;F6ZFU0;D3Z7N2;D3YY68;D3YZT9;Q8BW50	tr|A0A0R4J1L2|A0A0R4J1L2_MOUSE Elongation factor 1-delta OS=Mus musculus GN=Eef1d PE=1 SV=1;tr|Q91VK2|Q91VK2_MOUSE Eef1d protein OS=Mus musculus GN=Eef1d PE=1 SV=1;tr|F6ZFU0|F6ZFU0_MOUSE Elongation factor 1-delta (Fragment) OS=Mus musculus GN=Eef1d PE=1 SV	7	10	1	1	46.7	28.728		23637000	2199300	1920300	2291000	1974100	2095200	3747600	2983000	3656500	2769700
A0A0R4J1M3;Q8BYK4	tr|A0A0R4J1M3|A0A0R4J1M3_MOUSE Retinol dehydrogenase 12 OS=Mus musculus GN=Rdh12 PE=1 SV=1;sp|Q8BYK4|RDH12_MOUSE Retinol dehydrogenase 12 OS=Mus musculus GN=Rdh12 PE=2 SV=1	2	3	3	3	9.5	33.888		26921000	1556700	0	0	4140100	3191000	5649200	3814100	4048000	4522300
D6RE33;A0A0R4J1Q0;G5E896;Q3UJB9;F6V5I7;F6ZJ27	tr|D6RE33|D6RE33_MOUSE Enhancer of mRNA-decapping protein 4 OS=Mus musculus GN=Edc4 PE=1 SV=1;tr|A0A0R4J1Q0|A0A0R4J1Q0_MOUSE Enhancer of mRNA-decapping protein 4 OS=Mus musculus GN=Edc4 PE=1 SV=1;tr|G5E896|G5E896_MOUSE Enhancer of mRNA decapping 4, isoform	6	9	9	9	10.8	141.95		13779000	1000600	568490	860420	960050	1338200	2626400	2470300	1735700	2219200
Q58EU1;Q3UQ67;A0A0R4J1Y3;Q8BWU5;E0CXW7;E0CYK9;E9QMF4;E0CYN9	tr|Q58EU1|Q58EU1_MOUSE Probable tRNA N6-adenosine threonylcarbamoyltransferase OS=Mus musculus GN=Osgep PE=2 SV=1;tr|Q3UQ67|Q3UQ67_MOUSE Probable tRNA N6-adenosine threonylcarbamoyltransferase OS=Mus musculus GN=Osgep PE=2 SV=1;tr|A0A0R4J1Y3|A0A0R4J1Y3_MOU	8	2	2	2	7.8	36.3		5926600	397740	959100	2404700	0	768260	0	0	0	1396700
A0A0R4J1Y7;E9PXX7;Q3TEE8;Q91W90;Q3UWX1;Q3UBW8	tr|A0A0R4J1Y7|A0A0R4J1Y7_MOUSE Thioredoxin domain-containing protein 5 OS=Mus musculus GN=Txndc5 PE=1 SV=1;tr|E9PXX7|E9PXX7_MOUSE Thioredoxin domain-containing protein 5 OS=Mus musculus GN=Txndc5 PE=1 SV=1;tr|Q3TEE8|Q3TEE8_MOUSE Uncharacterized protein OS=	6	3	3	3	13.9	36.083		22240000	252790	0	0	2794000	3450100	4902500	2568100	2659700	5613000
W8W3J7;K4DID7;E9QNZ7;A0A0R4J1Z0;Q91WW4	tr|W8W3J7|W8W3J7_MOUSE Mas-related G protein-coupled receptor g3 OS=Mus musculus GN=Mgrg3 PE=3 SV=1;tr|K4DID7|K4DID7_MOUSE MAS-related GPR, member A2B OS=Mus musculus GN=Mrgpra2b PE=3 SV=1;tr|E9QNZ7|E9QNZ7_MOUSE MAS-related GPR, member A2B OS=Mus musculus	5	1	1	1	7.9	34.403		23851000	1388600	3062300	3305400	1711100	2429000	0	4199200	4180200	3575100
Q9CWD1;A0A0R4J1Z3;Q9CR67;Q9CZM3	tr|Q9CWD1|Q9CWD1_MOUSE Uncharacterized protein OS=Mus musculus GN=Tmem33 PE=2 SV=1;tr|A0A0R4J1Z3|A0A0R4J1Z3_MOUSE Transmembrane protein 33 OS=Mus musculus GN=Tmem33 PE=1 SV=1;sp|Q9CR67|TMM33_MOUSE Transmembrane protein 33 OS=Mus musculus GN=Tmem33 PE=1 SV=	4	2	2	2	12.4	19.87		33864000	2722400	3176700	3330700	2950500	3269500	5117900	4879500	3711700	4705200
A0A0R4J212;O35177	tr|A0A0R4J212|A0A0R4J212_MOUSE Enhancer of filamentation 1 OS=Mus musculus GN=Nedd9 PE=1 SV=1;sp|O35177|CASL_MOUSE Enhancer of filamentation 1 OS=Mus musculus GN=Nedd9 PE=1 SV=2	2	1	1	1	1.7	93.057		1181800	242820	253280	270250	193640	0	0	0	221830	0
G3UX04;Q3TQK5;A0A0R4J254;Q9ESJ0	tr|G3UX04|G3UX04_MOUSE Exportin-4 OS=Mus musculus GN=Xpo4 PE=1 SV=1;tr|Q3TQK5|Q3TQK5_MOUSE Uncharacterized protein OS=Mus musculus GN=Xpo4 PE=2 SV=1;tr|A0A0R4J254|A0A0R4J254_MOUSE Exportin-4 OS=Mus musculus GN=Xpo4 PE=1 SV=1;sp|Q9ESJ0|XPO4_MOUSE Exportin-4	4	1	1	1	20	7.7771		3869200	0	2208500	1660700	0	0	0	0	0	0
A0A0R4J259;Q7TMK9;G3UZI2;G3V018;G3UZ48;G3UXJ6;G3UWM1;Q3TRV3;G3XA76;G3UXU5	tr|A0A0R4J259|A0A0R4J259_MOUSE Heterogeneous nuclear ribonucleoprotein Q OS=Mus musculus GN=Syncrip PE=1 SV=1;sp|Q7TMK9|HNRPQ_MOUSE Heterogeneous nuclear ribonucleoprotein Q OS=Mus musculus GN=Syncrip PE=1 SV=2;tr|G3UZI2|G3UZI2_MOUSE Heterogeneous nuclear	10	14	14	9	32.8	62.543		223830000	18678000	5774700	8149900	27108000	27409000	38812000	29453000	31734000	36716000
G3UWV6;Q91VJ9;A0A0R4J263;Q8BUB3;O35083	tr|G3UWV6|G3UWV6_MOUSE 1-acyl-sn-glycerol-3-phosphate acyltransferase (Fragment) OS=Mus musculus GN=Agpat1 PE=1 SV=1;tr|Q91VJ9|Q91VJ9_MOUSE 1-acyl-sn-glycerol-3-phosphate acyltransferase OS=Mus musculus GN=Agpat1 PE=2 SV=1;tr|A0A0R4J263|A0A0R4J263_MOUSE 1-	5	1	1	1	10.6	22.337		7426200	407840	0	0	2070300	621800	2271200	1740400	0	314630
Q8BME2;Q5M9K5;A0A0R4J275;Q7TMF3	tr|Q8BME2|Q8BME2_MOUSE NADH dehydrogenase [ubiquinone] 1 alpha subcomplex subunit 12 OS=Mus musculus GN=Ndufa12 PE=2 SV=1;tr|Q5M9K5|Q5M9K5_MOUSE NADH dehydrogenase [ubiquinone] 1 alpha subcomplex subunit 12 OS=Mus musculus GN=Ndufa12 PE=2 SV=1;tr|A0A0R4J27	4	3	3	3	25.2	17.374		64887000	7528500	4851400	1673100	5869000	11818000	9198200	10288000	6734000	6926900
A0A0R4J2B0;V9GX43;S4R2U7;S4R1S7;E9QA47;Q9Z0H4;S4R2L5;S4R2J2;A3KGT0;S4R2S7;S4R2U1	tr|A0A0R4J2B0|A0A0R4J2B0_MOUSE CUGBP Elav-like family member 2 OS=Mus musculus GN=Celf2 PE=1 SV=1;tr|V9GX43|V9GX43_MOUSE CUGBP Elav-like family member 2 (Fragment) OS=Mus musculus GN=Celf2 PE=1 SV=1;tr|S4R2U7|S4R2U7_MOUSE CUGBP Elav-like family member 2 OS	11	5	5	5	12.3	46.607		136210000	12401000	9603600	12064000	14113000	17479000	17898000	19325000	16022000	17309000
A0A0R4J2B2;Q6WVG3;Q8CBQ4;Q69ZA6;Q14AX3;Q5DTY9	tr|A0A0R4J2B2|A0A0R4J2B2_MOUSE BTB/POZ domain-containing protein KCTD12 OS=Mus musculus GN=Kctd12 PE=1 SV=1;sp|Q6WVG3|KCD12_MOUSE BTB/POZ domain-containing protein KCTD12 OS=Mus musculus GN=Kctd12 PE=1 SV=1;tr|Q8CBQ4|Q8CBQ4_MOUSE Uncharacterized protein OS	6	8	8	8	32.1	35.888		225940000	16030000	14643000	27516000	19676000	27026000	37376000	22664000	30384000	30630000
A0A0U1RPR4;A0A0U1RNN2;A0A0U1RP07;A0A0U1RNG1;Q3U4A3;Q69ZP6;Q9CWK3	tr|A0A0U1RPR4|A0A0U1RPR4_MOUSE CD2 antigen cytoplasmic tail-binding protein 2 (Fragment) OS=Mus musculus GN=Cd2bp2 PE=1 SV=1;tr|A0A0U1RNN2|A0A0U1RNN2_MOUSE CD2 antigen cytoplasmic tail-binding protein 2 OS=Mus musculus GN=Cd2bp2 PE=1 SV=1;tr|A0A0U1RP07|A0A	7	1	1	1	29.2	5.0797		49552000	7710600	6334400	13180000	5279800	6244000	4322600	0	6480800	0
A0A0U1RNG8;Q80UY2	tr|A0A0U1RNG8|A0A0U1RNG8_MOUSE E3 ubiquitin-protein ligase KCMF1 OS=Mus musculus GN=Kcmf1 PE=1 SV=1;sp|Q80UY2|KCMF1_MOUSE E3 ubiquitin-protein ligase KCMF1 OS=Mus musculus GN=Kcmf1 PE=1 SV=1	2	1	1	1	10	12.45		9634000	1368400	1400900	0	1513700	1031600	2244500	0	2074800	0
A0A0U1RNJ1;Q3UHT6;P19096;Q3TB22;O89060;A0A0U1RPP5	tr|A0A0U1RNJ1|A0A0U1RNJ1_MOUSE Fatty acid synthase OS=Mus musculus GN=Fasn PE=1 SV=1;tr|Q3UHT6|Q3UHT6_MOUSE Uncharacterized protein OS=Mus musculus GN=Fasn PE=2 SV=1;sp|P19096|FAS_MOUSE Fatty acid synthase OS=Mus musculus GN=Fasn PE=1 SV=2;tr|Q3TB22|Q3TB22	6	22	22	22	11.7	272.22		25482000	1680500	5412300	1063000	2031300	2844000	2949200	2811000	3314000	3376500
A0A0U1RNL5;Q99P31	tr|A0A0U1RNL5|A0A0U1RNL5_MOUSE Hsp70-binding protein 1 (Fragment) OS=Mus musculus GN=Hspbp1 PE=1 SV=1;sp|Q99P31|HPBP1_MOUSE Hsp70-binding protein 1 OS=Mus musculus GN=Hspbp1 PE=1 SV=1	2	1	1	1	11.3	11.014		6377600	269970	0	0	866380	1149800	939280	958970	934290	1259000
A0A0U1RNN0;Q545X5;Q3U2D1;P35456	tr|A0A0U1RNN0|A0A0U1RNN0_MOUSE Plasminogen activator, urokinase receptor, isoform CRA_a OS=Mus musculus GN=Plaur PE=1 SV=1;tr|Q545X5|Q545X5_MOUSE Plasminogen activator, urokinase receptor, isoform CRA_b OS=Mus musculus GN=Plaur PE=2 SV=1;tr|Q3U2D1|Q3U2D1_M	4	1	1	1	7.2	24.673		4871300	0	0	0	882630	1148700	0	1662300	0	1177700
A0A0U1RNN5;Q544C5;P15702	tr|A0A0U1RNN5|A0A0U1RNN5_MOUSE Leukosialin (Fragment) OS=Mus musculus GN=Spn PE=1 SV=1;tr|Q544C5|Q544C5_MOUSE MCG145268, isoform CRA_a OS=Mus musculus GN=Spn PE=1 SV=1;sp|P15702|LEUK_MOUSE Leukosialin OS=Mus musculus GN=Spn PE=1 SV=1	3	4	4	4	47.9	14.547		269180000	31991000	28869000	13738000	28897000	14392000	42105000	29669000	34756000	44767000
A0A0U1RP90;Q8K2F8	tr|A0A0U1RP90|A0A0U1RP90_MOUSE Protein LSM14 homolog A (Fragment) OS=Mus musculus GN=Lsm14a PE=1 SV=1;sp|Q8K2F8|LS14A_MOUSE Protein LSM14 homolog A OS=Mus musculus GN=Lsm14a PE=1 SV=1	2	1	1	1	6.3	17.12		66345000	6683500	14581000	20979000	2063500	4591700	0	8848300	7065800	1531900
E9Q5Q0;Q3TYH7;Q3TGG2;A0A0U1RPL0;Q7TQH0	tr|E9Q5Q0|E9Q5Q0_MOUSE Ataxin-2-like protein (Fragment) OS=Mus musculus GN=Atxn2l PE=1 SV=2;tr|Q3TYH7|Q3TYH7_MOUSE Uncharacterized protein OS=Mus musculus GN=Atxn2l PE=2 SV=1;tr|Q3TGG2|Q3TGG2_MOUSE Ataxin-2-like protein OS=Mus musculus GN=Atxn2l PE=1 SV=1;	5	4	4	4	4.9	92.071		12671000	711240	2638300	1804500	1492000	486880	1428800	1133900	1660900	1315000
A0A0U1RPM2;P16879;A0A0U1RNL3;A0A0U1RPB9;A0A0U1RQ80;Q8CGG9	tr|A0A0U1RPM2|A0A0U1RPM2_MOUSE Tyrosine-protein kinase OS=Mus musculus GN=Fes PE=1 SV=1;sp|P16879|FES_MOUSE Tyrosine-protein kinase Fes/Fps OS=Mus musculus GN=Fes PE=1 SV=2	6	8	8	7	13.8	93.52		21081000	1848400	846640	990310	1204700	3610500	4539000	1684700	1322000	5035200
A0A0U1RPY8	tr|A0A0U1RPY8|A0A0U1RPY8_MOUSE Coronin (Fragment) OS=Mus musculus GN=Coro1a PE=1 SV=1	1	11	1	1	45.1	26.992		5974300	0	0	0	1169400	1940300	1035600	187260	947120	694600
A0A0U1RQ06;Q7TT10;Q3UJ76;P62743	tr|A0A0U1RQ06|A0A0U1RQ06_MOUSE AP-2 complex subunit sigma OS=Mus musculus GN=Ap2s1 PE=1 SV=1;tr|Q7TT10|Q7TT10_MOUSE Adaptor-related protein complex 2, sigma 1 subunit OS=Mus musculus GN=Ap2s1 PE=2 SV=1;tr|Q3UJ76|Q3UJ76_MOUSE Adaptor-related protein complex	4	1	1	1	9.8	11.034		19498000	5850100	3379500	0	0	3183800	0	0	2786900	4297400
A0A0U1RQ85;P22682;A0A0X1KG61;Q2M4H7;A0A0U1RP47;A0A0U1RP17;A0A0U1RNF1;B1NE42;A0A0U1RP95;B9EKI5;Q3TTA7	tr|A0A0U1RQ85|A0A0U1RQ85_MOUSE E3 ubiquitin-protein ligase CBL OS=Mus musculus GN=Cbl PE=1 SV=1;sp|P22682|CBL_MOUSE E3 ubiquitin-protein ligase CBL OS=Mus musculus GN=Cbl PE=1 SV=3;tr|A0A0X1KG61|A0A0X1KG61_MOUSE E3 ubiquitin-protein ligase CBL OS=Mus muscu	11	12	12	12	16.3	98.508		75412000	7296200	11237000	11170000	6694800	6813400	8346600	6534000	8718400	8600600
F6UFF7;Q69ZP4;A0A0X1KG62;Q8C4Y3	tr|F6UFF7|F6UFF7_MOUSE Negative elongation factor B (Fragment) OS=Mus musculus GN=Nelfb PE=1 SV=1;tr|Q69ZP4|Q69ZP4_MOUSE MKIAA1182 protein (Fragment) OS=Mus musculus GN=Nelfb PE=2 SV=1;tr|A0A0X1KG62|A0A0X1KG62_MOUSE Negative elongation factor B OS=Mus musc	4	1	1	1	10.4	16.27		9209300	0	0	9209300	0	0	0	0	0	0
A0A140LHA2;Q9WVA3;A0A140LIM5;A0A140LJ21;A0A140LI47	tr|A0A140LHA2|A0A140LHA2_MOUSE Mitotic checkpoint protein BUB3 OS=Mus musculus GN=Bub3 PE=1 SV=1;sp|Q9WVA3|BUB3_MOUSE Mitotic checkpoint protein BUB3 OS=Mus musculus GN=Bub3 PE=1 SV=2	5	8	8	8	29.6	36.766		89949000	6869200	9090600	11775000	7627000	10119000	14737000	7898800	13272000	8560000
A0A140LJ01;A0A140LHG8;Q9CYN2;A0A140LHR3;A0A140LJG6;A0A140LIK0;A0A140LHW5	tr|A0A140LJ01|A0A140LJ01_MOUSE Signal peptidase complex subunit 2 (Fragment) OS=Mus musculus GN=Spcs2 PE=1 SV=1;tr|A0A140LHG8|A0A140LHG8_MOUSE Signal peptidase complex subunit 2 OS=Mus musculus GN=Spcs2 PE=1 SV=1;sp|Q9CYN2|SPCS2_MOUSE Signal peptidase comp	7	5	5	5	26.6	28.078		118610000	11333000	7946500	2139800	13085000	10743000	16309000	19664000	15760000	21634000
A0A140LHY2;Q7TMR0	tr|A0A140LHY2|A0A140LHY2_MOUSE Lysosomal Pro-X carboxypeptidase OS=Mus musculus GN=Prcp PE=1 SV=1;sp|Q7TMR0|PCP_MOUSE Lysosomal Pro-X carboxypeptidase OS=Mus musculus GN=Prcp PE=1 SV=2	2	1	1	1	3.1	51.064		2861900	311460	0	0	0	0	0	861380	594100	1095000
A0A140LIZ5;Q8BKU2;Q569X4;Q3TUN5;Q3TFA5;P54775;Q3TJ97;Q3UBF0;Q52L53	tr|A0A140LIZ5|A0A140LIZ5_MOUSE 26S proteasome regulatory subunit 6B OS=Mus musculus GN=Psmc4 PE=1 SV=1;tr|Q8BKU2|Q8BKU2_MOUSE Uncharacterized protein OS=Mus musculus GN=Psmc4 PE=2 SV=1;tr|Q569X4|Q569X4_MOUSE Proteasome (Prosome, macropain) 26S subunit, ATP	9	9	9	9	27.6	43.549		53226000	4874200	3008300	3171500	5500400	6887600	8362800	7135800	7772700	6512900
A0A140T8J4;Q9R257	tr|A0A140T8J4|A0A140T8J4_MOUSE Heme-binding protein 1 OS=Mus musculus GN=Hebp1 PE=1 SV=1;sp|Q9R257|HEBP1_MOUSE Heme-binding protein 1 OS=Mus musculus GN=Hebp1 PE=1 SV=2	2	1	1	1	10.5	21.053		1430600	0	0	0	601370	0	829190	0	0	0
Q4V9X9;Q5M9M5;A0A140T8M7;P62751;Q91YK6;D3YTY6	tr|Q4V9X9|Q4V9X9_MOUSE Rpl23a protein (Fragment) OS=Mus musculus GN=Rpl23a PE=2 SV=1;tr|Q5M9M5|Q5M9M5_MOUSE MCG10806 OS=Mus musculus GN=Rpl23a PE=1 SV=1;tr|A0A140T8M7|A0A140T8M7_MOUSE Ribosomal protein L23A, pseudogene 3 OS=Mus musculus GN=Rpl23a-ps3 PE=3	6	6	6	6	37.4	17.564		1757700000	146470000	241780000	217130000	173610000	167100000	182320000	190040000	226590000	212670000
A0A140T8R7;Q8CFE3;A0A0A6YWY4;B2RSN6;A0A0A6YWP7;A0A0A6YXM5;Q6PGA0	tr|A0A140T8R7|A0A140T8R7_MOUSE REST corepressor 1 OS=Mus musculus GN=Rcor1 PE=1 SV=1;sp|Q8CFE3|RCOR1_MOUSE REST corepressor 1 OS=Mus musculus GN=Rcor1 PE=1 SV=3;tr|A0A0A6YWY4|A0A0A6YWY4_MOUSE REST corepressor 3 OS=Mus musculus GN=Rcor3 PE=1 SV=1;tr|B2RSN6|	7	2	2	2	9.4	43.886		4765300	623690	880330	1103300	208170	394400	397610	0	543380	614400
A0A158RFV1;Q9CW46;A0A1L1SRY4	tr|A0A158RFV1|A0A158RFV1_MOUSE MCG1050220 OS=Mus musculus GN=Raver1 PE=2 SV=1;sp|Q9CW46|RAVR1_MOUSE Ribonucleoprotein PTB-binding 1 OS=Mus musculus GN=Raver1 PE=1 SV=2;tr|A0A1L1SRY4|A0A1L1SRY4_MOUSE Ribonucleoprotein PTB-binding 1 (Fragment) OS=Mus musculu	3	3	3	3	5.5	79.381		13918000	1881900	1769400	2025300	953810	1154200	1781200	1412700	1681300	1258500
Q3TRC8;A0A158SIT9;J3JS97;Q91YI4;Q5F2D9;Q3UCU5;J3QNV6	tr|Q3TRC8|Q3TRC8_MOUSE Uncharacterized protein OS=Mus musculus GN=Arrb2 PE=2 SV=1;tr|A0A158SIT9|A0A158SIT9_MOUSE Arrestin, beta 2 OS=Mus musculus GN=Arrb2 PE=4 SV=1;tr|J3JS97|J3JS97_MOUSE Arrestin, beta 2 OS=Mus musculus GN=Arrb2 PE=4 SV=1;sp|Q91YI4|ARRB2_	7	12	12	11	37.3	45.155		142650000	13423000	14622000	15629000	11895000	18184000	15610000	16303000	18690000	18296000
A0A1B0GS13;A0A165ELP6;A0A1B0GT81;A0A1B0GTA4;Q8K3J2;Q544Z6;Q3TXJ7;Q07813	tr|A0A1B0GS13|A0A1B0GS13_MOUSE Apoptosis regulator BAX (Fragment) OS=Mus musculus GN=Bax PE=1 SV=1;tr|A0A165ELP6|A0A165ELP6_MOUSE BCL2 associated-X protein (Fragment) OS=Mus musculus GN=Bax PE=2 SV=1;tr|A0A1B0GT81|A0A1B0GT81_MOUSE Apoptosis regulator BAX O	8	1	1	1	9.6	12.513		29097000	3014200	5022600	4179600	2114900	2673700	3391100	2564300	3913200	2223400
A0A171EBK8;Q5SVL6	tr|A0A171EBK8|A0A171EBK8_MOUSE Rap1 GTPase-activating protein 2 OS=Mus musculus GN=Rap1gap2 PE=1 SV=1;sp|Q5SVL6|RPGP2_MOUSE Rap1 GTPase-activating protein 2 OS=Mus musculus GN=Rap1gap2 PE=1 SV=1	2	2	2	2	4.1	84.377		6904400	1075100	370780	562260	457330	933690	1088100	426340	451300	1539600
A0A171EBL2;E9Q555	tr|A0A171EBL2|A0A171EBL2_MOUSE E3 ubiquitin-protein ligase RNF213 OS=Mus musculus GN=Rnf213 PE=1 SV=1;sp|E9Q555|RN213_MOUSE E3 ubiquitin-protein ligase RNF213 OS=Mus musculus GN=Rnf213 PE=1 SV=2	2	9	9	9	2.5	584.62		1029800	37729	105370	74297	137040	103230	285830	174490	59097	52672
A0A171KXD3;Q8C2D7;Q80WB1;Q3UIG8;Q80WV6;Q9JIF0;Q3TPF5;A0A140LHF7;Q9CX58;A0A140LJ70;A0A140LJF4;A0A140LHS4;A0A140LJ68;A0A140LIF7;A0A140LI33	tr|A0A171KXD3|A0A171KXD3_MOUSE Protein arginine N-methyltransferase 1 OS=Mus musculus GN=Prmt1 PE=1 SV=1;tr|Q8C2D7|Q8C2D7_MOUSE Uncharacterized protein OS=Mus musculus GN=Prmt1 PE=2 SV=1;tr|Q80WB1|Q80WB1_MOUSE Prmt1 protein (Fragment) OS=Mus musculus GN=Pr	15	7	7	7	28.9	36.567		67720000	6604500	5515900	7741300	4500400	5512100	11931000	5858800	8824300	11232000
A0A1B0GQU8;Q0QEW9;Q642K1;Q58EW0;P35980;A0A1B0GSF7;A0A1B0GSS8;A0A1B0GSA8;A0A1B0GRZ3;A0A1B0GS28	tr|A0A1B0GQU8|A0A1B0GQU8_MOUSE 60S ribosomal protein L18 OS=Mus musculus GN=Rpl18 PE=1 SV=1;tr|Q0QEW9|Q0QEW9_MOUSE Ribosomal protein L18 (Fragment) OS=Mus musculus GN=Rpl18 PE=2 SV=1;tr|Q642K1|Q642K1_MOUSE Ribosomal protein L18 OS=Mus musculus GN=Rpl18 PE=	10	5	5	5	35.2	18.101		1083700000	130670000	74223000	121740000	99688000	97647000	152230000	149210000	93560000	164770000
A0A1B0GR11;Q93092	tr|A0A1B0GR11|A0A1B0GR11_MOUSE Transaldolase OS=Mus musculus GN=Taldo1 PE=1 SV=1;sp|Q93092|TALDO_MOUSE Transaldolase OS=Mus musculus GN=Taldo1 PE=1 SV=2	2	17	17	17	36.4	42.151		2175400000	254220000	191520000	223030000	209480000	201470000	336020000	237810000	224160000	297710000
A0A1B0GSH4;A0A1B0GT75;A0A1B0GR63;Q9DB34	tr|A0A1B0GSH4|A0A1B0GSH4_MOUSE Charged multivesicular body protein 2a OS=Mus musculus GN=Chmp2a PE=1 SV=1;tr|A0A1B0GT75|A0A1B0GT75_MOUSE Charged multivesicular body protein 2a OS=Mus musculus GN=Chmp2a PE=1 SV=1;tr|A0A1B0GR63|A0A1B0GR63_MOUSE Charged multi	4	1	1	1	12.5	6.7829		9172200	1331000	0	0	1137400	1025500	2076800	1734700	0	1866700
A0A1B0GRA5;P70302;A0A1B0GR78;Q3TUX9	tr|A0A1B0GRA5|A0A1B0GRA5_MOUSE Stromal interaction molecule 1 OS=Mus musculus GN=Stim1 PE=1 SV=1;sp|P70302|STIM1_MOUSE Stromal interaction molecule 1 OS=Mus musculus GN=Stim1 PE=1 SV=2;tr|A0A1B0GR78|A0A1B0GR78_MOUSE Stromal interaction molecule 1 OS=Mus mu	4	4	4	4	6.1	88.93		8259900	876080	100810	191870	967880	1456800	1180200	495070	1137100	1854100
A0A1B0GRH2;Q3V1H5;A0A1B0GRT6;P49446;Q3TU63	tr|A0A1B0GRH2|A0A1B0GRH2_MOUSE Receptor-type tyrosine-protein phosphatase OS=Mus musculus GN=Ptpre PE=1 SV=1;tr|Q3V1H5|Q3V1H5_MOUSE Receptor-type tyrosine-protein phosphatase OS=Mus musculus GN=Ptpre PE=2 SV=1;tr|A0A1B0GRT6|A0A1B0GRT6_MOUSE Receptor-type t	5	3	3	3	4.5	82.092		6982500	0	0	0	1241400	1323000	1632600	330640	1052500	1402400
Q3TCR8;Q5PR72;Q3TXZ6;A0A1B0GRJ9;F7D3W5;Q922S4;Q3TD37;Q3TYK5;Q3TY50;Q3TYU3	tr|Q3TCR8|Q3TCR8_MOUSE Phosphodiesterase OS=Mus musculus GN=Pde2a PE=2 SV=1;tr|Q5PR72|Q5PR72_MOUSE Phosphodiesterase OS=Mus musculus GN=Pde2a PE=1 SV=1;tr|Q3TXZ6|Q3TXZ6_MOUSE Phosphodiesterase OS=Mus musculus GN=Pde2a PE=1 SV=1;tr|A0A1B0GRJ9|A0A1B0GRJ9_MOU	10	16	16	16	20.2	104.62		55391000	9913600	4480100	4178800	7243700	7456300	9882500	4758500	4445700	3031400
Q544R1;Q3UYN1;A0A1B0GRP7;Q9Z2Y8;A0A1B0GRR5;Q6P8V7;A0A1B0GQY5;Q80ZV3;A0A1B0GSA1;A0A1B0GSP5	tr|Q544R1|Q544R1_MOUSE Proline synthetase co-transcribed OS=Mus musculus GN=Plpbp PE=1 SV=1;tr|Q3UYN1|Q3UYN1_MOUSE Uncharacterized protein OS=Mus musculus GN=Plpbp PE=2 SV=1;tr|A0A1B0GRP7|A0A1B0GRP7_MOUSE Pyridoxal phosphate-binding protein (Fragment) OS=M	10	4	4	4	17.2	30.048		24499000	2210800	3032600	1161600	3454700	2488900	3438400	2385400	826770	5499400
A0A1B0GRR3;Q3UC02;Q9DB79;P62281;Q9D0P6;A0A1B0GSE8;Q9CW75	tr|A0A1B0GRR3|A0A1B0GRR3_MOUSE 40S ribosomal protein S11 OS=Mus musculus GN=Rps11 PE=1 SV=1;tr|Q3UC02|Q3UC02_MOUSE MCG23457 OS=Mus musculus GN=Rps11 PE=1 SV=1;tr|Q9DB79|Q9DB79_MOUSE Uncharacterized protein OS=Mus musculus GN=Rps11 PE=2 SV=1;sp|P62281|RS11_	7	7	7	7	47.7	15.198		928840000	94204000	126270000	117630000	78953000	68266000	101230000	111020000	110960000	120310000
D3YTP8;A0A1B0GRR9;Q9D181;Q9CY46;Q9QXA5;A0A1B0GQZ9	tr|D3YTP8|D3YTP8_MOUSE U6 snRNA-associated Sm-like protein LSm4 (Fragment) OS=Mus musculus GN=Lsm4 PE=1 SV=8;tr|A0A1B0GRR9|A0A1B0GRR9_MOUSE U6 snRNA-associated Sm-like protein LSm4 OS=Mus musculus GN=Lsm4 PE=1 SV=1;tr|Q9D181|Q9D181_MOUSE Uncharacterized pr	6	2	2	2	18.8	11.072		39289000	6042100	0	0	4119800	7554800	5152000	13687000	0	2733900
A0A1B0GRX1;P70677	tr|A0A1B0GRX1|A0A1B0GRX1_MOUSE Caspase-3 OS=Mus musculus GN=Casp3 PE=1 SV=1;sp|P70677|CASP3_MOUSE Caspase-3 OS=Mus musculus GN=Casp3 PE=1 SV=1	2	3	3	3	23.3	14.835		57696000	8166200	10996000	5903900	3722100	2939200	5604200	4658900	7850000	7855100
A0A1B0GST6;A0A1B0GS72;Q3U1W9;A0A1B0GSZ7;Q4FK35;Q3U429;Q61470	tr|A0A1B0GST6|A0A1B0GST6_MOUSE Leukocyte antigen CD37 (Fragment) OS=Mus musculus GN=Cd37 PE=1 SV=1;tr|A0A1B0GS72|A0A1B0GS72_MOUSE Tetraspanin (Fragment) OS=Mus musculus GN=Cd37 PE=1 SV=1;tr|Q3U1W9|Q3U1W9_MOUSE Tetraspanin OS=Mus musculus GN=Cd37 PE=1 SV=1;	7	1	1	1	18	6.6728		52520000	8663900	13243000	8373000	0	4605100	0	4528000	5953500	7153700
Q3SXF0;A0A1B0GS75	tr|Q3SXF0|Q3SXF0_MOUSE Interferon-induced transmembrane protein 6 OS=Mus musculus GN=Ifitm6 PE=2 SV=1;tr|A0A1B0GS75|A0A1B0GS75_MOUSE Interferon-induced transmembrane protein 6 OS=Mus musculus GN=Ifitm6 PE=4 SV=1	2	1	1	1	15.4	11.561		2381800000	173590000	327700000	258650000	136660000	410600000	144300000	341260000	499290000	89759000
E3VVQ8;E9Q3Z5;A0A1B0GS91;Q8K4L3;Q7TMJ2;Q99KQ8;Q3TTX5;Q8K4L2;F6R6A4;Q7TN21;F6TBK9;A1A5A1;Q8C9L0	tr|E3VVQ8|E3VVQ8_MOUSE Supervillin muscle-specific isoform OS=Mus musculus GN=Svil PE=2 SV=1;tr|E9Q3Z5|E9Q3Z5_MOUSE Supervillin OS=Mus musculus GN=Svil PE=1 SV=1;tr|A0A1B0GS91|A0A1B0GS91_MOUSE Supervillin OS=Mus musculus GN=Svil PE=1 SV=1;sp|Q8K4L3|SVIL_MO	13	8	8	8	6.4	198.53		18420000	2576800	1828900	1267500	2554300	1351400	2020300	3499500	2754900	566270
D3Z0B9;A0A1B0GSU0;Q571I9;A0A1B0GSN3;Q9CWT9	tr|D3Z0B9|D3Z0B9_MOUSE Aldehyde dehydrogenase family 16 member A1 OS=Mus musculus GN=Aldh16a1 PE=1 SV=3;tr|A0A1B0GSU0|A0A1B0GSU0_MOUSE Aldehyde dehydrogenase family 16 member A1 OS=Mus musculus GN=Aldh16a1 PE=1 SV=1;sp|Q571I9|A16A1_MOUSE Aldehyde dehydroge	5	8	8	8	15.4	79.488		101990000	12361000	8402200	16739000	12187000	7538800	13560000	8892700	11277000	11037000
Q564E2;A0A1B0GSX0;P06151;A0A1B0GSR9;Q99K20;Q3UDU4;Q3TI99;Q3THB4;Q3TCI7;Q3UIC3;D3YZQ9;A0A1B0GT41;A0A1B0GQX5;A0A1B0GSL7;Q6NXW3;A0A1B0GRW9;A0A1B0GS79;A0A1B0GRC1;A0A1B0GRS2	tr|Q564E2|Q564E2_MOUSE L-lactate dehydrogenase OS=Mus musculus GN=Ldha PE=1 SV=1;tr|A0A1B0GSX0|A0A1B0GSX0_MOUSE L-lactate dehydrogenase OS=Mus musculus GN=Ldha PE=1 SV=1;sp|P06151|LDHA_MOUSE L-lactate dehydrogenase A chain OS=Mus musculus GN=Ldha PE=1 SV=3	19	12	12	11	42.5	36.498		2087900000	214900000	227070000	181580000	208170000	243350000	269860000	216170000	262640000	264150000
A0A1B0GSX7;Q6PFD9;B2RQL0;A0A140T8J8;B7ZN81;Q3TPG3;A0A1B0GRB5;Q3UJE5;A0A1B0GRA7;Q9EQM8;A0A1B0GS62;Q4FZE7;Q3TP40	tr|A0A1B0GSX7|A0A1B0GSX7_MOUSE Nuclear pore complex protein Nup98-Nup96 OS=Mus musculus GN=Nup98 PE=1 SV=1;sp|Q6PFD9|NUP98_MOUSE Nuclear pore complex protein Nup98-Nup96 OS=Mus musculus GN=Nup98 PE=1 SV=2;tr|B2RQL0|B2RQL0_MOUSE Nuclear pore complex protein	13	11	11	11	8.7	197.31		7384500	500330	440950	586230	820470	527090	1080500	954270	1204700	1269900
A0A1B0GX27;Q3ULU3;O35855;Q8CAX1;O88374;A0A1B0GST1;A0A1B0GQY4	tr|A0A1B0GX27|A0A1B0GX27_MOUSE Branched-chain-amino-acid aminotransferase OS=Mus musculus GN=Bcat2 PE=1 SV=1;tr|Q3ULU3|Q3ULU3_MOUSE Branched-chain-amino-acid aminotransferase OS=Mus musculus GN=Bcat2 PE=1 SV=1;sp|O35855|BCAT2_MOUSE Branched-chain-amino-aci	7	3	3	3	9	43.493		18001000	431100	0	4413400	749670	3023300	4194300	3415500	828380	945070
E9Q405;A0A1C7ZN10;K3W4L0;B2RRE2;E9QAX2;Q9JMH9;E9QA74;Q6PER1	tr|E9Q405|E9Q405_MOUSE Unconventional myosin-XVIIIa OS=Mus musculus GN=Myo18a PE=1 SV=1;tr|A0A1C7ZN10|A0A1C7ZN10_MOUSE Unconventional myosin-XVIIIa OS=Mus musculus GN=Myo18a PE=1 SV=1;tr|K3W4L0|K3W4L0_MOUSE Unconventional myosin-XVIIIa OS=Mus musculus GN=M	8	8	8	8	4.9	193.64		10081000	1098500	3392900	961160	635010	907610	333140	575550	811810	1365000
A0A1D5RL92;G5E8I8;Q8CGZ0	tr|A0A1D5RL92|A0A1D5RL92_MOUSE Calcium homeostasis endoplasmic reticulum protein OS=Mus musculus GN=Cherp PE=1 SV=1;tr|G5E8I8|G5E8I8_MOUSE Calcium homeostasis endoplasmic reticulum protein OS=Mus musculus GN=Cherp PE=1 SV=2;sp|Q8CGZ0|CHERP_MOUSE Calcium ho	3	5	5	5	6.6	106.41		15708000	1556500	1088400	1213900	1398600	1638600	2091900	2237800	1836300	2646600
E9QKV6;B9EHV1;A0A1D5RLD1;E9PWZ6;E9PZW8;Q9QY06;Q3TRQ0;Q3UFX8;Q3TRT6;A0A1D5RLW4	tr|E9QKV6|E9QKV6_MOUSE Unconventional myosin-IXb OS=Mus musculus GN=Myo9b PE=1 SV=1;tr|B9EHV1|B9EHV1_MOUSE Myosin IXb OS=Mus musculus GN=Myo9b PE=2 SV=1;tr|A0A1D5RLD1|A0A1D5RLD1_MOUSE Unconventional myosin-IXb OS=Mus musculus GN=Myo9b PE=1 SV=1;tr|E9PWZ6|E	10	5	5	5	4.2	222.44		1369100	71922	0	44425	164600	236680	247180	218260	149550	236480
Q8CEL6;A0A1D5RM55;Q8CDH5;A0A1D5RM74;A0A1D5RLE4;Q8BPF9;Q545V8;O54833	tr|Q8CEL6|Q8CEL6_MOUSE Uncharacterized protein (Fragment) OS=Mus musculus PE=2 SV=1;tr|A0A1D5RM55|A0A1D5RM55_MOUSE Casein kinase II subunit alpha (Fragment) OS=Mus musculus GN=Csnk2a2 PE=1 SV=1;tr|Q8CDH5|Q8CDH5_MOUSE Uncharacterized protein (Fragment) OS=	8	2	2	2	20.8	14.082		23918000	1273800	0	0	2985700	1498200	4697300	5038800	4051500	4373200
Q3UH32;F7CGG2;E9PZA7;E9QLK7;E9PWT1;A0A1D5RLL4;Q80YV3;Q3TIP5	tr|Q3UH32|Q3UH32_MOUSE Uncharacterized protein (Fragment) OS=Mus musculus GN=Trrap PE=2 SV=1;tr|F7CGG2|F7CGG2_MOUSE Transformation/transcription domain-associated protein (Fragment) OS=Mus musculus GN=Trrap PE=1 SV=1;tr|E9PZA7|E9PZA7_MOUSE Transformation/t	8	2	2	2	0.9	309.4		267080	0	0	24117	34960	38701	38428	63879	0	66995
A0A1D5RLR0;Q3TXK6;Q9QZE7	tr|A0A1D5RLR0|A0A1D5RLR0_MOUSE Translin-associated protein X OS=Mus musculus GN=Tsnax PE=1 SV=1;tr|Q3TXK6|Q3TXK6_MOUSE Uncharacterized protein OS=Mus musculus GN=Tsnax PE=2 SV=1;sp|Q9QZE7|TSNAX_MOUSE Translin-associated protein X OS=Mus musculus GN=Tsnax P	3	2	2	2	13.1	19.348		2645300	0	1408900	1236400	0	0	0	0	0	0
A0A1D5RLS1;Q60902	tr|A0A1D5RLS1|A0A1D5RLS1_MOUSE Epidermal growth factor receptor substrate 15-like 1 OS=Mus musculus GN=Eps15l1 PE=1 SV=1;sp|Q60902|EP15R_MOUSE Epidermal growth factor receptor substrate 15-like 1 OS=Mus musculus GN=Eps15l1 PE=1 SV=3	2	4	4	4	6.8	66.204		7038800	681550	754890	966880	704450	771150	599920	506210	880980	1172800
A0A1D5RMB4;A0A1D5RLV0;Q8C1D8	tr|A0A1D5RMB4|A0A1D5RMB4_MOUSE Protein IWS1 homolog (Fragment) OS=Mus musculus GN=Iws1 PE=1 SV=1;tr|A0A1D5RLV0|A0A1D5RLV0_MOUSE Protein IWS1 homolog OS=Mus musculus GN=Iws1 PE=1 SV=1;sp|Q8C1D8|IWS1_MOUSE Protein IWS1 homolog OS=Mus musculus GN=Iws1 PE=1 SV	3	2	2	2	11.6	22.57		7352100	1347500	1286700	1378900	434970	1039400	0	622930	531450	710210
A0A1D5RM65;Q5EBH1	tr|A0A1D5RM65|A0A1D5RM65_MOUSE Ras association domain-containing protein 5 OS=Mus musculus GN=Rassf5 PE=1 SV=1;sp|Q5EBH1|RASF5_MOUSE Ras association domain-containing protein 5 OS=Mus musculus GN=Rassf5 PE=1 SV=1	2	1	1	1	4.8	35.341		2446200	0	0	0	317680	404100	500680	318860	397150	507770
A0A1D5RM85;P62717;A0A1D5RLW5;Q3THJ0;A0A1D5RM79;A0A1D5RME4;Q05CK2;A0A1D5RMC7	tr|A0A1D5RM85|A0A1D5RM85_MOUSE 60S ribosomal protein L18a (Fragment) OS=Mus musculus GN=Rpl18a PE=1 SV=1;sp|P62717|RL18A_MOUSE 60S ribosomal protein L18a OS=Mus musculus GN=Rpl18a PE=1 SV=1;tr|A0A1D5RLW5|A0A1D5RLW5_MOUSE 60S ribosomal protein L18a OS=Mus m	8	7	7	7	31.1	24.638		420550000	46479000	27857000	32111000	47552000	42179000	56563000	54639000	55706000	57462000
B7ZWL1;B2RXR3;A0A1D5RMJ8;Q6ZQ08;A0A1D5RMD8;Q8CGI8;A0A1D5RML9;A0A1D5RM04	tr|B7ZWL1|B7ZWL1_MOUSE CCR4-NOT transcription complex subunit 1 OS=Mus musculus GN=Cnot1 PE=1 SV=1;tr|B2RXR3|B2RXR3_MOUSE Cnot1 protein OS=Mus musculus GN=Cnot1 PE=2 SV=1;tr|A0A1D5RMJ8|A0A1D5RMJ8_MOUSE CCR4-NOT transcription complex subunit 1 OS=Mus muscul	8	8	8	8	4.5	260.95		2826900	299610	118730	347260	229150	215180	431920	409220	400720	375140
A0A1G5SJ59	tr|A0A1G5SJ59|A0A1G5SJ59_MOUSE Irgb6 homologue OS=Mus musculus GN=OTTMUSPWKG00059379 PE=4 SV=1	1	1	1	1	4.5	32.927		151340000	18921000	13854000	22381000	15451000	17992000	26961000	18572000	17206000	0
Q5SVP3;A0A1G5SJA5;P97372;G3X9V0;E0CZ90;Q99LN3	tr|Q5SVP3|Q5SVP3_MOUSE MCG22048, isoform CRA_c OS=Mus musculus GN=PSME2b PE=1 SV=1;tr|A0A1G5SJA5|A0A1G5SJA5_MOUSE OTTMUSWSBP00075795 OS=Mus musculus domesticus GN=OTTMUSWSBG00059279 PE=4 SV=1;sp|P97372|PSME2_MOUSE Proteasome activator complex subunit 2 OS=	6	9	9	9	40.6	27.057		171280000	17991000	16203000	12878000	20831000	15558000	30194000	19684000	15042000	22901000
Q9Z0I7;A0A1G5SJH7;A0A1G5SJ71;Q3UU73	tr|Q9Z0I7|Q9Z0I7_MOUSE Schlafen 1 OS=Mus musculus GN=Slfn1 PE=1 SV=1;tr|A0A1G5SJH7|A0A1G5SJH7_MOUSE Schlafen family member 1 OS=Mus musculus domesticus GN=OTTMUSWSBG00059304 PE=4 SV=1;tr|A0A1G5SJ71|A0A1G5SJ71_MOUSE Schlafen family member 1 OS=Mus musculus	4	6	6	6	22.8	37.996		73913000	9849500	9721700	7528300	5170500	7970500	11124000	9382500	10259000	2906900
V9PVS1;U5NJN6;J7NUP1;A0A1G5SJL2;A0A1G5SJJ3;Q60766	tr|V9PVS1|V9PVS1_MUSMC Immunity related GTPase m1 OS=Mus musculus castaneus GN=Irgm1 PE=2 SV=1;tr|U5NJN6|U5NJN6_MUSMM Immunity-related GTPase family M member 1 OS=Mus musculus molossinus GN=Irgm1 PE=4 SV=1;tr|J7NUP1|J7NUP1_MOUSE Immunity-related GTPase fam	6	2	2	2	5.1	44.901		20068000	1470000	1959000	961840	2623500	1838000	755850	3330400	3158100	3971200
U5NG85;Q61635;Q3U0K0;A0A1G5SK64;Q99M59;A0A1L1SQM2;J7NUN6;J7PDK7;J7PCI3;U5NGE1;Q8R5D8;Q5NCB2;Q3ULY1;A0A1G5SJB0;U5NJP0;Q5SVP2;Q5SVP0;A0A1G5SJV1;A0A1G5SJ58	tr|U5NG85|U5NG85_MUSMM Interferon gamma inducible protein 47 OS=Mus musculus molossinus GN=Irgd PE=4 SV=1;tr|Q61635|Q61635_MOUSE GTP-binding protein OS=Mus musculus GN=Ifi47 PE=1 SV=1;tr|Q3U0K0|Q3U0K0_MOUSE Uncharacterized protein OS=Mus musculus GN=Ifi47	19	13	13	12	35.2	46.929		68865000	7526400	6082000	8506200	6028700	5847100	9391100	9838000	6144300	9500800
A0A1I7Q4G8;E9QMN5;Q8CHY6;A0A1D5RM07;A0A1D5RM58;Q6PAH8	tr|A0A1I7Q4G8|A0A1I7Q4G8_MOUSE Transcriptional repressor p66 alpha OS=Mus musculus GN=Gatad2a PE=1 SV=1;tr|E9QMN5|E9QMN5_MOUSE Transcriptional repressor p66 alpha OS=Mus musculus GN=Gatad2a PE=1 SV=1;sp|Q8CHY6|P66A_MOUSE Transcriptional repressor p66 alpha	6	5	5	4	12.4	65.434		11456000	936320	1849400	1432400	622420	1385700	1558900	1016600	1534200	1120200
E9PUM4;B2RY15;A0A1L1SQ51;Q71LX4;Q3TN69	tr|E9PUM4|E9PUM4_MOUSE Talin-2 OS=Mus musculus GN=Tln2 PE=1 SV=1;tr|B2RY15|B2RY15_MOUSE Tln2 protein OS=Mus musculus GN=Tln2 PE=2 SV=1;tr|A0A1L1SQ51|A0A1L1SQ51_MOUSE Talin-2 OS=Mus musculus GN=Tln2 PE=1 SV=1;sp|Q71LX4|TLN2_MOUSE Talin-2 OS=Mus musculus GN=	5	13	1	1	5	271.66		461170	0	0	0	80857	119670	84964	83338	92343	0
A0A1L1SQA7;A0A1L1SS47;A0A1L1SQF2;Q8BH15;A0A1L1SSE2	tr|A0A1L1SQA7|A0A1L1SQA7_MOUSE CCR4-NOT transcription complex subunit 10 OS=Mus musculus GN=Cnot10 PE=1 SV=1;tr|A0A1L1SS47|A0A1L1SS47_MOUSE CCR4-NOT transcription complex subunit 10 OS=Mus musculus GN=Cnot10 PE=1 SV=1;tr|A0A1L1SQF2|A0A1L1SQF2_MOUSE CCR4-NO	5	2	2	2	9.7	32.076		2961700	469440	464230	459660	302560	496550	0	286650	0	482590
A0A1L1SQA8;Q58EA6;P62852	tr|A0A1L1SQA8|A0A1L1SQA8_MOUSE 40S ribosomal protein S25 OS=Mus musculus GN=Rps25 PE=1 SV=1;tr|Q58EA6|Q58EA6_MOUSE MCG10725, isoform CRA_a OS=Mus musculus GN=Rps25 PE=1 SV=1;sp|P62852|RS25_MOUSE 40S ribosomal protein S25 OS=Mus musculus GN=Rps25 PE=1 SV=1	3	5	5	5	39.8	10.309		1990800000	214350000	235310000	305050000	159830000	183740000	226860000	225880000	224640000	215120000
A0A1L1SRR1;Q3THH0;Q9ESD6;Q8R325	tr|A0A1L1SRR1|A0A1L1SRR1_MOUSE CKLF-like MARVEL transmembrane domain-containing protein 7 OS=Mus musculus GN=Cmtm7 PE=1 SV=1;tr|Q3THH0|Q3THH0_MOUSE Uncharacterized protein OS=Mus musculus GN=Cmtm7 PE=2 SV=1;sp|Q9ESD6|CKLF7_MOUSE CKLF-like MARVEL transmembr	4	3	3	3	63.5	6.6316		457210000	55964000	11643000	51681000	43285000	21474000	56703000	73249000	74738000	68478000
A0A1L1SRX2;O08739;Q922J7;F6XQD0;D3Z4N3	tr|A0A1L1SRX2|A0A1L1SRX2_MOUSE AMP deaminase OS=Mus musculus GN=Ampd3 PE=1 SV=1;sp|O08739|AMPD3_MOUSE AMP deaminase 3 OS=Mus musculus GN=Ampd3 PE=1 SV=2;tr|Q922J7|Q922J7_MOUSE Ampd3 protein (Fragment) OS=Mus musculus GN=Ampd3 PE=2 SV=1	5	6	6	6	10.1	89.567		32988000	2144100	2442100	3177500	3908700	4237600	6264200	2947500	4264200	3602200
A0A1L1SS60;Q8BH79;A0A1L1SR14	tr|A0A1L1SS60|A0A1L1SS60_MOUSE Anoctamin OS=Mus musculus GN=Ano10 PE=1 SV=1;sp|Q8BH79|ANO10_MOUSE Anoctamin-10 OS=Mus musculus GN=Ano10 PE=1 SV=1;tr|A0A1L1SR14|A0A1L1SR14_MOUSE Anoctamin-10 OS=Mus musculus GN=Ano10 PE=1 SV=1	3	2	2	2	5.8	58.204		7003900	0	0	0	1272600	1838400	1868000	628010	523370	873630
A0A1L1SSA3;Q9CXU9;J3QPZ8;J3QN87	tr|A0A1L1SSA3|A0A1L1SSA3_MOUSE Eukaryotic translation initiation factor 1b (Fragment) OS=Mus musculus GN=Eif1b PE=1 SV=1;sp|Q9CXU9|EIF1B_MOUSE Eukaryotic translation initiation factor 1b OS=Mus musculus GN=Eif1b PE=1 SV=2;tr|J3QPZ8|J3QPZ8_MOUSE Eukaryotic	4	3	1	1	47	11.358		3200800	0	0	0	1546900	1171000	0	482820	0	0
Q3UDS7;Q3TJ10;A0A1L1SSF2;Q8VDL4	tr|Q3UDS7|Q3UDS7_MOUSE ADP-dependent glucokinase OS=Mus musculus GN=Adpgk PE=1 SV=1;tr|Q3TJ10|Q3TJ10_MOUSE Uncharacterized protein OS=Mus musculus GN=Adpgk PE=2 SV=1;tr|A0A1L1SSF2|A0A1L1SSF2_MOUSE ADP-dependent glucokinase OS=Mus musculus GN=Adpgk PE=1 SV=	4	13	13	13	36	53.788		1169700000	92130000	99619000	126530000	131640000	121400000	163460000	137380000	142000000	155520000
A0A1L1SSF8;Q91V76	tr|A0A1L1SSF8|A0A1L1SSF8_MOUSE RIKEN cDNA 4931406C07 gene OS=Mus musculus GN=4931406C07Rik PE=1 SV=1;sp|Q91V76|CK054_MOUSE Ester hydrolase C11orf54 homolog OS=Mus musculus PE=1 SV=1	2	2	2	2	9.9	31.334		6657100	475040	0	0	841560	671930	1449100	1521400	215910	1482200
A0A1L1STC6;Q6ZWR6;A0A1L1SRV6;Q7TQH5;Q0VGB8;Q6PI72;Q6ZWS6;Q80T95;Q6ZWR5;Q2NL50;Q6ZWR1;Q6ZWT2	tr|A0A1L1STC6|A0A1L1STC6_MOUSE Nesprin-1 OS=Mus musculus GN=Syne1 PE=1 SV=1;sp|Q6ZWR6|SYNE1_MOUSE Nesprin-1 OS=Mus musculus GN=Syne1 PE=1 SV=2	12	100	100	100	14	1009.9		30229000	3043400	2411500	2511800	3338900	3019100	4597800	3901900	3160600	4243300
Q45VK5;Q45VK6;A0A1L1STE4;Q9Z1X4;Q3UD30;A0A1L1SQR7;A0A1L1SU19;A0A1L1SR62;A0A1L1SQ69;A0A1L1SSU8;A0A1L1ST48;Q8C5B7;Q91WM1	tr|Q45VK5|Q45VK5_MOUSE Interleukin enhancer-binding factor 3 OS=Mus musculus GN=Ilf3 PE=1 SV=1;tr|Q45VK6|Q45VK6_MOUSE Nuclear factor 90 OS=Mus musculus GN=Ilf3 PE=2 SV=1;tr|A0A1L1STE4|A0A1L1STE4_MOUSE Interleukin enhancer-binding factor 3 OS=Mus musculus G	13	11	11	11	20.8	76.347		30739000	2735500	3627900	3814900	2796300	3057400	5105500	2699300	3810500	3091400
A0A1L1STE6;Q9D6R2	tr|A0A1L1STE6|A0A1L1STE6_MOUSE Isocitrate dehydrogenase [NAD] subunit, mitochondrial OS=Mus musculus GN=Idh3a PE=1 SV=1;sp|Q9D6R2|IDH3A_MOUSE Isocitrate dehydrogenase [NAD] subunit alpha, mitochondrial OS=Mus musculus GN=Idh3a PE=1 SV=1	2	3	3	3	9.6	41.52		25174000	1089900	982270	846170	3046400	3454900	4526500	3659800	2443300	5124300
A0A1L1STP0;Q2M4G8;O35239	tr|A0A1L1STP0|A0A1L1STP0_MOUSE Tyrosine-protein phosphatase non-receptor type 9 (Fragment) OS=Mus musculus GN=Ptpn9 PE=1 SV=1;tr|Q2M4G8|Q2M4G8_MOUSE Protein tyrosine phosphatase, non-receptor type 9 OS=Mus musculus GN=Ptpn9 PE=1 SV=1;sp|O35239|PTN9_MOUSE T	3	1	1	1	8.3	16.348		2092000	489410	620650	981910	0	0	0	0	0	0
A0A1L1SU22;Q9D1P4;A0A1L1STQ1;A0A1L1SSG7;A0A1L1STZ1	tr|A0A1L1SU22|A0A1L1SU22_MOUSE Cysteine and histidine-rich domain-containing protein 1 (Fragment) OS=Mus musculus GN=Chordc1 PE=1 SV=1;sp|Q9D1P4|CHRD1_MOUSE Cysteine and histidine-rich domain-containing protein 1 OS=Mus musculus GN=Chordc1 PE=1 SV=1;tr|A0A	5	3	3	3	15.6	28.665		22497000	1635300	1038500	1759900	452880	3741300	2756100	3884900	4450100	2778200
Q3ULT2;A0A1L1SV25;P57780;Q3UDJ7;E9Q2W9;A0A1L1SVJ6;Q8BP35;D3Z0L8;D3Z761;Q61064;Q61063	tr|Q3ULT2|Q3ULT2_MOUSE Actinin alpha 4 OS=Mus musculus GN=Actn4 PE=1 SV=1;tr|A0A1L1SV25|A0A1L1SV25_MOUSE Alpha-actinin-4 OS=Mus musculus GN=Actn4 PE=1 SV=1;sp|P57780|ACTN4_MOUSE Alpha-actinin-4 OS=Mus musculus GN=Actn4 PE=1 SV=1;tr|Q3UDJ7|Q3UDJ7_MOUSE Unch	11	44	27	1	57.5	104.98		253000000	19628000	20690000	21697000	29257000	24689000	40785000	24136000	33264000	38856000
A0A1L1SV73;Q8BY87	tr|A0A1L1SV73|A0A1L1SV73_MOUSE Ubiquitin carboxyl-terminal hydrolase 47 OS=Mus musculus GN=Usp47 PE=1 SV=1;sp|Q8BY87|UBP47_MOUSE Ubiquitin carboxyl-terminal hydrolase 47 OS=Mus musculus GN=Usp47 PE=1 SV=2	2	2	2	2	2	157.15		1028300	58826	165090	0	91589	203030	132460	154290	95694	127330
A0A1L1SVG6;Q8BY89	tr|A0A1L1SVG6|A0A1L1SVG6_MOUSE Choline transporter-like protein 2 OS=Mus musculus GN=Slc44a2 PE=1 SV=1;sp|Q8BY89|CTL2_MOUSE Choline transporter-like protein 2 OS=Mus musculus GN=Slc44a2 PE=1 SV=2	2	2	2	2	2.9	62.643		4517700	0	727510	952180	0	0	658340	1068100	0	1111500
A0A1L1SVK0;Q61206;A0A1L1SQ76;A0A1L1SRD0;Q8BTA2	tr|A0A1L1SVK0|A0A1L1SVK0_MOUSE Platelet-activating factor acetylhydrolase IB subunit beta (Fragment) OS=Mus musculus GN=Pafah1b2 PE=1 SV=1;sp|Q61206|PA1B2_MOUSE Platelet-activating factor acetylhydrolase IB subunit beta OS=Mus musculus GN=Pafah1b2 PE=1 SV=	5	2	2	2	13.7	22.056		12779000	1286300	1057900	1673900	2172200	1909900	2671300	1239100	768410	0
A0A1S6GWG6;P62814;B0LAC8;Q99KA3;Q6P6I3;Q91YH6;Q8C3L6;A0A0U1RNU9	tr|A0A1S6GWG6|A0A1S6GWG6_MOUSE Uncharacterized protein OS=Mus musculus GN=Atp6v1b2 PE=2 SV=1;sp|P62814|VATB2_MOUSE V-type proton ATPase subunit B, brain isoform OS=Mus musculus GN=Atp6v1b2 PE=1 SV=1	8	14	14	14	38.3	59.278		260090000	18972000	22810000	21555000	27852000	29887000	39027000	33318000	34056000	32614000
A0A1S6GWH2;Q9Z1N5;Q3TB18;G3UXI6	tr|A0A1S6GWH2|A0A1S6GWH2_MOUSE Uncharacterized protein OS=Mus musculus GN=Ddx39b PE=2 SV=1;sp|Q9Z1N5|DX39B_MOUSE Spliceosome RNA helicase Ddx39b OS=Mus musculus GN=Ddx39b PE=1 SV=1;tr|Q3TB18|Q3TB18_MOUSE Uncharacterized protein OS=Mus musculus GN=Ddx39b PE	4	14	14	5	31.3	54.642		471970000	48066000	39241000	17436000	62639000	55436000	83957000	47145000	55734000	62311000
S4R1L5;S4R2P8;A0A1S6GWH3;A0A1S6GWH6;O88738	tr|S4R1L5|S4R1L5_MOUSE Baculoviral IAP repeat-containing protein 6 OS=Mus musculus GN=Birc6 PE=1 SV=1;tr|S4R2P8|S4R2P8_MOUSE Baculoviral IAP repeat-containing protein 6 OS=Mus musculus GN=Birc6 PE=1 SV=1;tr|A0A1S6GWH3|A0A1S6GWH3_MOUSE Uncharacterized prote	5	3	3	3	0.9	529.32		76628	0	36326	16605	10048	13650	0	0	0	0
H3BKN0;A0A1S6GWH4;Q1HFZ0	tr|H3BKN0|H3BKN0_MOUSE tRNA (cytosine(34)-C(5))-methyltransferase OS=Mus musculus GN=Nsun2 PE=1 SV=1;tr|A0A1S6GWH4|A0A1S6GWH4_MOUSE Uncharacterized protein OS=Mus musculus GN=Nsun2 PE=2 SV=1;sp|Q1HFZ0|NSUN2_MOUSE tRNA (cytosine(34)-C(5))-methyltransferase	3	3	3	3	6	81.373		5394300	636100	1075000	549520	393090	562900	564870	0	501330	1111500
B9EHN0;A0A1S6GWH5;Q02053;P31254;Q61341	tr|B9EHN0|B9EHN0_MOUSE Ubiquitin-activating enzyme E1, Chr X OS=Mus musculus GN=Uba1 PE=1 SV=1;tr|A0A1S6GWH5|A0A1S6GWH5_MOUSE Uncharacterized protein OS=Mus musculus GN=Uba1 PE=2 SV=1;sp|Q02053|UBA1_MOUSE Ubiquitin-like modifier-activating enzyme 1 OS=Mus	5	28	28	28	33.4	117.81		372210000	39777000	31436000	34716000	36843000	36942000	54214000	46028000	44110000	48147000
A2VCP7;A2AU35;A0A1S6GWI1;Q8BHL8	tr|A2VCP7|A2VCP7_MOUSE Psmf1 protein (Fragment) OS=Mus musculus GN=Psmf1 PE=2 SV=1;tr|A2AU35|A2AU35_MOUSE Proteasome (Prosome, macropain) inhibitor subunit 1 OS=Mus musculus GN=Psmf1 PE=1 SV=1;tr|A0A1S6GWI1|A0A1S6GWI1_MOUSE Uncharacterized protein OS=Mus m	4	1	1	1	5	26.073		26581000	3191000	3740400	5757800	2109800	1607600	2905500	2427900	2179000	2662100
Q8R3P3;Q60FD1;A0A1S6GWI2;P61166	tr|Q8R3P3|Q8R3P3_MOUSE 1810006K21Rik protein OS=Mus musculus GN=Tmem258 PE=2 SV=1;tr|Q60FD1|Q60FD1_MOUSE MCG1963, isoform CRA_b OS=Mus musculus GN=Tmem258 PE=2 SV=1;tr|A0A1S6GWI2|A0A1S6GWI2_MOUSE Uncharacterized protein OS=Mus musculus GN=Tmem258 PE=2 SV=1	4	1	1	1	16.7	5.4524		95485000	22335000	37147000	36003000	0	0	0	0	0	0
Q9WUP9;Q9R296;A0A1S6GWJ3;P04184	tr|Q9WUP9|Q9WUP9_MOUSE Thymidine kinase (Fragment) OS=Mus musculus GN=Tk1a PE=3 SV=1;tr|Q9R296|Q9R296_MOUSE Thymidine kinase (Fragment) OS=Mus musculus GN=Tk1b PE=3 SV=1;tr|A0A1S6GWJ3|A0A1S6GWJ3_MOUSE Thymidine kinase OS=Mus musculus GN=Tk1 PE=2 SV=1;sp|P0	4	1	1	1	30.9	5.9699		3769700	0	0	0	0	0	0	3769700	0	0
Q5CZY5;E9Q027;Q3TIJ0;A0A1S6GWJ6;Q8C5L3	tr|Q5CZY5|Q5CZY5_MOUSE Cnot2 protein OS=Mus musculus GN=Cnot2 PE=2 SV=1;tr|E9Q027|E9Q027_MOUSE CCR4-NOT transcription complex subunit 2 OS=Mus musculus GN=Cnot2 PE=1 SV=1;tr|Q3TIJ0|Q3TIJ0_MOUSE Uncharacterized protein OS=Mus musculus GN=Cnot2 PE=2 SV=1;tr|	5	1	1	1	3.2	54.962		1377100	0	580150	796960	0	0	0	0	0	0
Q8BMP9;Q5U412;Q3UA28;Q3U9H4;Q3U573;Q3TUR1;Q3TG02;Q3U547;A0A1S6GWK0;P46978;Q3TVN9;Q8BWT4	tr|Q8BMP9|Q8BMP9_MOUSE Uncharacterized protein OS=Mus musculus GN=Stt3a PE=2 SV=1;tr|Q5U412|Q5U412_MOUSE STT3, subunit of the oligosaccharyltransferase complex, homolog A (S. cerevisiae) OS=Mus musculus GN=Stt3a PE=2 SV=1;tr|Q3UA28|Q3UA28_MOUSE Uncharacter	12	6	6	6	8.9	80.53		50374000	2366600	4901900	4322700	4701400	5816700	6712500	6087400	7125500	8339300
Q642K0;A0A1W2P6F6;A0A1W2P7Q9;Q60605;A0A1W2P6G5;Q3TIG9;B0LAC7;Q8CI43	tr|Q642K0|Q642K0_MOUSE MCG140959, isoform CRA_a OS=Mus musculus GN=Myl6 PE=2 SV=1;tr|A0A1W2P6F6|A0A1W2P6F6_MOUSE Myosin light polypeptide 6 OS=Mus musculus GN=Myl6 PE=1 SV=1;tr|A0A1W2P7Q9|A0A1W2P7Q9_MOUSE Myosin light polypeptide 6 OS=Mus musculus GN=Myl6	8	8	8	8	55.6	16.961		3595700000	346070000	285380000	360320000	356850000	379090000	495230000	441020000	459260000	472440000
A0A1W2P7I5;A0A1W2P6P1;Q3TN35;Q8BJU0	tr|A0A1W2P7I5|A0A1W2P7I5_MOUSE Small glutamine-rich tetratricopeptide repeat-containing protein alpha (Fragment) OS=Mus musculus GN=Sgta PE=1 SV=1;tr|A0A1W2P6P1|A0A1W2P6P1_MOUSE Small glutamine-rich tetratricopeptide repeat-containing protein alpha (Fragme	4	3	3	3	22.9	18.27		47435000	5967000	6052200	5878600	4467300	3263000	8947300	5288200	4225100	3346900
A0A1W2P6R8;Q3TC93	tr|A0A1W2P6R8|A0A1W2P6R8_MOUSE HCLS1-binding protein 3 (Fragment) OS=Mus musculus GN=Hs1bp3 PE=1 SV=1;sp|Q3TC93|H1BP3_MOUSE HCLS1-binding protein 3 OS=Mus musculus GN=Hs1bp3 PE=1 SV=2	2	1	1	1	9.6	17.561		8372500	1271400	0	177360	1038300	1000300	1695700	0	1379800	1809800
Q6PAQ0;A3KMF1;A3KMF0;A0A1W2P6S5;P39087	tr|Q6PAQ0|Q6PAQ0_MOUSE Glutamate receptor ionotropic, kainate 2 OS=Mus musculus GN=Grik2 PE=1 SV=1;tr|A3KMF1|A3KMF1_MOUSE Grik2 protein (Fragment) OS=Mus musculus GN=Grik2 PE=2 SV=1;tr|A3KMF0|A3KMF0_MOUSE Grik2 protein (Fragment) OS=Mus musculus GN=Grik2 P	5	1	1	1	2.4	38.351		9230500	0	0	0	0	0	0	3691400	2474600	3064500
A0A1W2P6V9;Q3UMB9	tr|A0A1W2P6V9|A0A1W2P6V9_MOUSE WASH complex subunit 4 OS=Mus musculus GN=Washc4 PE=1 SV=1;sp|Q3UMB9|WASC4_MOUSE WASH complex subunit 4 OS=Mus musculus GN=Washc4 PE=1 SV=2	2	1	1	1	7.5	21.483		13765000	0	0	0	2022600	2377200	2440300	1895300	2243000	2786900
A0A1W2P6X3;Q9JL26;A2AB60;Q3TY82;G3UWI1	tr|A0A1W2P6X3|A0A1W2P6X3_MOUSE Formin-like protein 1 OS=Mus musculus GN=Fmnl1 PE=1 SV=1;sp|Q9JL26|FMNL1_MOUSE Formin-like protein 1 OS=Mus musculus GN=Fmnl1 PE=1 SV=1;tr|A2AB60|A2AB60_MOUSE Formin-like 1, isoform CRA_c OS=Mus musculus GN=Fmnl1 PE=1 SV=1;tr	5	21	21	19	23.9	122.7		102010000	11404000	9992900	9740900	8340700	9410400	14667000	10764000	12949000	14746000
H3BJS5;H3BJ71;H3BKL6;H3BL19;Q3TZZ3;H3BJI6;H3BK44;E9PY90;H3BK48;E9Q3S2;H3BKH2;H3BJS0;A0A1W2P711;Q8R311;Q91ZV0	tr|H3BJS5|H3BJS5_MOUSE Melanoma inhibitory activity protein 2 (Fragment) OS=Mus musculus GN=Mia2 PE=1 SV=1;tr|H3BJ71|H3BJ71_MOUSE Melanoma inhibitory activity protein 2 (Fragment) OS=Mus musculus GN=Mia2 PE=1 SV=1;tr|H3BKL6|H3BKL6_MOUSE Melanoma inhibitory	15	1	1	1	4.8	30.773		2393900	0	0	0	228330	233090	381930	880460	313510	356620
A0A1W2P8D6;A0A1W2P727;A0A1W2P8E1;Q8BU33	tr|A0A1W2P8D6|A0A1W2P8D6_MOUSE Acetolactate synthase-like protein (Fragment) OS=Mus musculus GN=Ilvbl PE=1 SV=1;tr|A0A1W2P727|A0A1W2P727_MOUSE Acetolactate synthase-like protein OS=Mus musculus GN=Ilvbl PE=1 SV=1;tr|A0A1W2P8E1|A0A1W2P8E1_MOUSE Acetolactate	4	2	2	2	8.8	36.02		212720000	36187000	18554000	22942000	37545000	40420000	607370	633060	55139000	687900
A0A1W2P729;Q9QXT0	tr|A0A1W2P729|A0A1W2P729_MOUSE Protein canopy homolog 2 (Fragment) OS=Mus musculus GN=Cnpy2 PE=1 SV=1;sp|Q9QXT0|CNPY2_MOUSE Protein canopy homolog 2 OS=Mus musculus GN=Cnpy2 PE=1 SV=1	2	1	1	1	11.8	15.316		27942000	2451600	3425100	4238700	1798700	2194000	4289000	2721300	3222000	3601700
A1L0U3;A1L0V4;B9EI85;A0A1W2P768;P84228;P68433;F8WI35;P84244;P02301;E0CZ27;E0CYN1;E0CYR7	tr|A1L0U3|A1L0U3_MOUSE Histone H3 (Fragment) OS=Mus musculus GN=Hist1h3e PE=2 SV=1;tr|A1L0V4|A1L0V4_MOUSE Histone H3 (Fragment) OS=Mus musculus GN=Hist1h3i PE=2 SV=1;tr|B9EI85|B9EI85_MOUSE Histone H3 OS=Mus musculus GN=Hist2h3b PE=2 SV=1;tr|A0A1W2P768|A0A1	12	10	10	10	37.6	15.029		57295000000	6140100000	3970300000	3346800000	6943100000	6671700000	8627200000	7496400000	6896300000	7203300000
A0A1W2P7L7;P59708	tr|A0A1W2P7L7|A0A1W2P7L7_MOUSE Splicing factor 3B subunit 6 (Fragment) OS=Mus musculus GN=Sf3b6 PE=1 SV=1;sp|P59708|SF3B6_MOUSE Splicing factor 3B subunit 6 OS=Mus musculus GN=Sf3b6 PE=1 SV=1	2	1	1	1	10.8	13.037		34485000	0	0	0	4813000	6209600	6774000	4711800	5185900	6790800
A0A1W2P7X0;E9QMV2;C6EQJ5;Q4KML4	tr|A0A1W2P7X0|A0A1W2P7X0_MOUSE Costars family protein ABRACL (Fragment) OS=Mus musculus GN=Abracl PE=1 SV=1;tr|E9QMV2|E9QMV2_MOUSE Costars family protein ABRACL OS=Mus musculus GN=Abracl PE=1 SV=1;tr|C6EQJ5|C6EQJ5_MOUSE ASL1/3110003A17Rik fusion protein OS	4	3	3	3	66.7	6.4374		290600000	12370000	0	0	76187000	30103000	40921000	31347000	52637000	47032000
A0A1W2P7X1;Q64281	tr|A0A1W2P7X1|A0A1W2P7X1_MOUSE Leukocyte immunoglobulin-like receptor, subfamily B, member 4A OS=Mus musculus GN=Lilrb4a PE=1 SV=1;sp|Q64281|LIRB4_MOUSE Leukocyte immunoglobulin-like receptor subfamily B member 4 OS=Mus musculus GN=Lilrb4 PE=1 SV=1	2	1	1	1	4.7	33.15		16462000	1236700	1695100	1261300	1475500	2332700	1769200	1160100	2583500	2948200
A0A1W2P7Y0;A0A1W2P841;Q9D279	tr|A0A1W2P7Y0|A0A1W2P7Y0_MOUSE Mitotic interactor and substrate of PLK1 (Fragment) OS=Mus musculus GN=Misp PE=1 SV=1;tr|A0A1W2P841|A0A1W2P841_MOUSE Mitotic interactor and substrate of PLK1 (Fragment) OS=Mus musculus GN=Misp PE=1 SV=1;sp|Q9D279|MISP_MOUSE M	3	1	1	1	11.1	13.557		12087000	0	0	0	2593800	2228700	2274900	2998100	0	1991300
A0A1W2P8C6;Q549D0;Q3UC80;Q8BT06;P41731	tr|A0A1W2P8C6|A0A1W2P8C6_MOUSE Tetraspanin (Fragment) OS=Mus musculus GN=Cd63 PE=1 SV=1;tr|Q549D0|Q549D0_MOUSE Tetraspanin OS=Mus musculus GN=Cd63 PE=1 SV=1;tr|Q3UC80|Q3UC80_MOUSE Tetraspanin OS=Mus musculus GN=Cd63 PE=2 SV=1;tr|Q8BT06|Q8BT06_MOUSE Tetrasp	5	2	2	2	11	17.865		855780000	76835000	56624000	54709000	59281000	53711000	105450000	158020000	129480000	161680000
A0A1W2P8D3;Q3UDX9;Q3UBB0;Q8BFR4	tr|A0A1W2P8D3|A0A1W2P8D3_MOUSE N-acetylglucosamine-6-sulfatase (Fragment) OS=Mus musculus GN=Gns PE=1 SV=1;tr|Q3UDX9|Q3UDX9_MOUSE Uncharacterized protein (Fragment) OS=Mus musculus GN=Gns PE=2 SV=1;tr|Q3UBB0|Q3UBB0_MOUSE Uncharacterized protein (Fragment)	4	1	1	1	7.3	18.639		5312600	837000	0	0	0	0	1040000	1568300	522600	1344800
A0A1W2P8F6;Q3V1C0;Q3UVA4;Q9EQL1;Q9JHG7;Q3UPS4	tr|A0A1W2P8F6|A0A1W2P8F6_MOUSE Phosphatidylinositol 4,5-bisphosphate 3-kinase catalytic subunit gamma isoform OS=Mus musculus GN=Pik3cg PE=1 SV=1;tr|Q3V1C0|Q3V1C0_MOUSE Uncharacterized protein OS=Mus musculus GN=Pik3cg PE=2 SV=1;tr|Q3UVA4|Q3UVA4_MOUSE Unch	6	4	4	4	5	117.32		3482300	288030	738960	547040	65373	337120	369570	473350	367300	295590
A0A1Y7VJ48;Q5I0U7;P48428	tr|A0A1Y7VJ48|A0A1Y7VJ48_MOUSE Tubulin-specific chaperone A OS=Mus musculus GN=Tbca PE=1 SV=1;tr|Q5I0U7|Q5I0U7_MOUSE Tubulin-specific chaperone A OS=Mus musculus GN=Tbca PE=1 SV=1;sp|P48428|TBCA_MOUSE Tubulin-specific chaperone A OS=Mus musculus GN=Tbca PE	3	3	3	3	39.3	9.9271		116220000	8437500	11591000	11811000	11518000	14806000	14599000	13226000	13864000	16366000
A0A1Y7VKP8;A0A1Y7VM38;P52503	tr|A0A1Y7VKP8|A0A1Y7VKP8_MOUSE NADH dehydrogenase [ubiquinone] iron-sulfur protein 6, mitochondrial OS=Mus musculus GN=Ndufs6 PE=1 SV=1;tr|A0A1Y7VM38|A0A1Y7VM38_MOUSE NADH dehydrogenase [ubiquinone] iron-sulfur protein 6, mitochondrial OS=Mus musculus GN=N	3	2	2	2	26.5	10.908		43666000	2997300	0	11397000	4534400	5181300	6650800	5189100	3115300	4600800
E0CY91;E0CYW1;E0CY38;A0A1Y7VKT9;E0CZB3;Q9EPV8	tr|E0CY91|E0CY91_MOUSE Ubiquitin-like protein 5 OS=Mus musculus GN=Ubl5 PE=4 SV=1;tr|E0CYW1|E0CYW1_MOUSE Ubiquitin-like protein 5 (Fragment) OS=Mus musculus GN=Ubl5 PE=1 SV=1;tr|E0CY38|E0CY38_MOUSE Ubiquitin-like 5, isoform CRA_a OS=Mus musculus GN=Ubl5 PE	6	1	1	1	19.1	5.4004		226750000	25882000	56482000	35234000	23432000	16373000	20838000	24565000	23941000	0
A0A1Y7VL93;Q9CXY0;P63321	tr|A0A1Y7VL93|A0A1Y7VL93_MOUSE Ras-related protein Ral-A (Fragment) OS=Mus musculus GN=Rala PE=1 SV=1;tr|Q9CXY0|Q9CXY0_MOUSE Uncharacterized protein OS=Mus musculus GN=Rala PE=2 SV=1;sp|P63321|RALA_MOUSE Ras-related protein Ral-A OS=Mus musculus GN=Rala PE	3	2	1	1	19	15.353		9126500	1168900	0	0	2034000	0	3543000	0	2380500	0
A0A1Y7VL95;Q9CVI1;Q9CVF5;Q9JI75;A0A1Y7VMA0	tr|A0A1Y7VL95|A0A1Y7VL95_MOUSE NAD(P)H dehydrogenase, quinone 2, isoform CRA_b OS=Mus musculus GN=Nqo2 PE=1 SV=1;tr|Q9CVI1|Q9CVI1_MOUSE Uncharacterized protein (Fragment) OS=Mus musculus GN=Nqo2 PE=2 SV=1;tr|Q9CVF5|Q9CVF5_MOUSE Uncharacterized protein (Fra	5	2	2	2	13.4	21.481		5387300	1665500	1446400	0	0	0	0	0	0	2275300
A0A1Y7VLK0;Q3UBU9;Q62446;A0A1Y7VP01;A0A1Y7VMJ9;A0A1Y7VJ86	tr|A0A1Y7VLK0|A0A1Y7VLK0_MOUSE Peptidylprolyl isomerase OS=Mus musculus GN=Fkbp3 PE=1 SV=1;tr|Q3UBU9|Q3UBU9_MOUSE Peptidylprolyl isomerase OS=Mus musculus GN=Fkbp3 PE=1 SV=1;sp|Q62446|FKBP3_MOUSE Peptidyl-prolyl cis-trans isomerase FKBP3 OS=Mus musculus GN	6	4	4	4	27.1	21.069		43699000	2089800	251060	210140	6951000	10397000	5015500	1619600	11447000	5717900
A0A1Y7VLP0;P56379	tr|A0A1Y7VLP0|A0A1Y7VLP0_MOUSE RIKEN cDNA 2010107E04 gene (Fragment) OS=Mus musculus GN=2010107E04Rik PE=1 SV=1;sp|P56379|68MP_MOUSE 6.8 kDa mitochondrial proteolipid OS=Mus musculus GN=Mp68 PE=1 SV=1	2	1	1	1	14	6.5608		124440000	8422200	0	6648500	11913000	15320000	17843000	26403000	14599000	23294000
A0A1Y7VMH3;Q3UWH3;Q3TL56;Q80X41;Q8CA60;A0A1Y7VLL5	tr|A0A1Y7VMH3|A0A1Y7VMH3_MOUSE Serine/threonine-protein kinase VRK1 OS=Mus musculus GN=Vrk1 PE=1 SV=1;tr|Q3UWH3|Q3UWH3_MOUSE Vaccinia related kinase 1, isoform CRA_a OS=Mus musculus GN=Vrk1 PE=2 SV=1;tr|Q3TL56|Q3TL56_MOUSE Uncharacterized protein OS=Mus mu	6	10	10	10	26.9	46.845		83192000	6254100	8078600	7952000	7814100	6687900	14643000	8726600	9865000	13170000
A0A1Y7VMZ4;Q91YQ6;B2RTE4;Q99L15;Q14DI6;Q53YL1;Q6P2K2;Q32Q92;O55137;Q8BWN8;Q6Q2Z6;Q9QYR7;Q9QYR9	tr|A0A1Y7VMZ4|A0A1Y7VMZ4_MOUSE Acyl-coenzyme A thioesterase 3 OS=Mus musculus GN=Acot3 PE=1 SV=1;tr|Q91YQ6|Q91YQ6_MOUSE Acot5 protein OS=Mus musculus GN=Acot5 PE=2 SV=1;tr|B2RTE4|B2RTE4_MOUSE Acyl-CoA thioesterase 6 OS=Mus musculus GN=Acot6 PE=2 SV=1;tr|Q9	13	1	1	1	3.9	31.199		7451900	2165400	1327000	2569600	0	0	0	0	0	1389800
A0A1Y7VN19;Q9CXR1	tr|A0A1Y7VN19|A0A1Y7VN19_MOUSE Dehydrogenase/reductase SDR family member 7 (Fragment) OS=Mus musculus GN=Dhrs7 PE=1 SV=1;sp|Q9CXR1|DHRS7_MOUSE Dehydrogenase/reductase SDR family member 7 OS=Mus musculus GN=Dhrs7 PE=1 SV=2	2	6	6	6	18.8	40.589		76233000	9010700	6293400	4026300	5680100	14208000	10879000	7098200	11660000	7377600
A0A1Z3MHX2;A0A087WRA4;D0QMC3;P0DOV2;E9QKL6;A0A1Z3MI45;D0QMC5;A0A087WQG9;P0DOV1;A0A1Z3MI21;Q8CGE8	tr|A0A1Z3MHX2|A0A1Z3MHX2_MOUSE MndaL OS=Mus musculus domesticus GN=Mndal PE=4 SV=1;tr|A0A087WRA4|A0A087WRA4_MOUSE Myeloid cell nuclear differentiation antigen-like protein OS=Mus musculus GN=Mndal PE=1 SV=1;sp|D0QMC3|MNDAL_MOUSE Myeloid cell nuclear differ	11	4	4	4	8	60.521		16102000	2101300	910510	719320	1430000	2076600	2036000	2306900	1575200	2945800
Q3UN35;A0A1Z4EAV4;Q09200;A0A1W2P6F0;Q8VDF0	tr|Q3UN35|Q3UN35_MOUSE Beta-1,4 N-acetylgalactosaminyltransferase OS=Mus musculus GN=B4galnt1 PE=1 SV=1;tr|A0A1Z4EAV4|A0A1Z4EAV4_MOUSE Beta-1,4-N-acetyl-galactosaminyl transferase 1 OS=Mus musculus GN=B4galnt1 PE=2 SV=1;sp|Q09200|B4GN1_MOUSE Beta-1,4 N-ace	5	5	5	5	13.1	59.211		17515000	2462700	1916100	2499700	1880700	1689900	1564800	3012700	1468400	1019900
A0AUN0;Q4G0C0;G3X928;Q6NZC7;Q3UY74	tr|A0AUN0|A0AUN0_MOUSE Sec23ip protein (Fragment) OS=Mus musculus GN=Sec23ip PE=2 SV=1;tr|Q4G0C0|Q4G0C0_MOUSE Sec23 interacting protein OS=Mus musculus GN=Sec23ip PE=2 SV=1;tr|G3X928|G3X928_MOUSE SEC23-interacting protein OS=Mus musculus GN=Sec23ip PE=1 SV	5	3	3	3	3.9	95.116		3648300	282390	333900	764480	534440	456950	1059700	0	0	216430
A0ELI5;Q8K2D3	tr|A0ELI5|A0ELI5_MOUSE Uncharacterized protein OS=Mus musculus GN=Edc3 PE=1 SV=1;sp|Q8K2D3|EDC3_MOUSE Enhancer of mRNA-decapping protein 3 OS=Mus musculus GN=Edc3 PE=1 SV=1	2	2	2	2	4.7	55.957		2967200	0	922840	962100	0	629600	0	0	452670	0
A0JLQ7;Q8BFV2;E9Q5V9;E9Q1H5;Q8BNM3	tr|A0JLQ7|A0JLQ7_MOUSE Pcid2 protein (Fragment) OS=Mus musculus GN=Pcid2 PE=2 SV=1;sp|Q8BFV2|PCID2_MOUSE PCI domain-containing protein 2 OS=Mus musculus GN=Pcid2 PE=1 SV=1;tr|E9Q5V9|E9Q5V9_MOUSE PCI domain-containing protein 2 OS=Mus musculus GN=Pcid2 PE=1	5	2	2	2	4.9	47.018		5179900	321830	394450	577140	370400	334740	1099000	723350	343510	1015400
A0JNY3;Q8BUV3	tr|A0JNY3|A0JNY3_MOUSE Gephyrin OS=Mus musculus GN=Gphn PE=1 SV=1;sp|Q8BUV3|GEPH_MOUSE Gephyrin OS=Mus musculus GN=Gphn PE=1 SV=2	2	2	2	2	2.7	83.665		1596300	75739	293390	500990	45873	204530	266470	60920	148350	0
A0JNY7;F7CBP1;G3XA17;Q62448;Q3U9U9;Q3URI0;F7DAB1;F6TW20	tr|A0JNY7|A0JNY7_MOUSE Eukaryotic translation initiation factor 4, gamma 2 OS=Mus musculus GN=Eif4g2 PE=2 SV=1;tr|F7CBP1|F7CBP1_MOUSE Eukaryotic translation initiation factor 4 gamma 2 OS=Mus musculus GN=Eif4g2 PE=1 SV=1;tr|G3XA17|G3XA17_MOUSE Eukaryotic t	8	8	8	8	9.8	102.13		6299800	478400	1720100	1163900	793220	791630	477180	125750	500410	249310
Q8BVQ0;A0MNP4;Q9ERF3;D6RJ72;Q8BKW0;D6RDC7	tr|Q8BVQ0|Q8BVQ0_MOUSE WD repeat-containing protein 61 OS=Mus musculus GN=Wdr61 PE=1 SV=1;tr|A0MNP4|A0MNP4_MOUSE CDW13/WDR61 OS=Mus musculus GN=Wdr61 PE=1 SV=1;sp|Q9ERF3|WDR61_MOUSE WD repeat-containing protein 61 OS=Mus musculus GN=Wdr61 PE=1 SV=1;tr|D6RJ	6	2	2	2	9.3	30.928		1517900	0	0	0	356960	472560	688380	0	0	0
D3YZC1;E9Q1J7;Q3UYS0;A0PJE6;Q8CFZ3;Q7TMF4;Q99MN9	tr|D3YZC1|D3YZC1_MOUSE Propionyl-CoA carboxylase beta chain, mitochondrial (Fragment) OS=Mus musculus GN=Pccb PE=1 SV=1;tr|E9Q1J7|E9Q1J7_MOUSE Propionyl-CoA carboxylase beta chain, mitochondrial OS=Mus musculus GN=Pccb PE=1 SV=1;tr|Q3UYS0|Q3UYS0_MOUSE Unch	7	2	2	2	10.9	27.144		7436100	0	0	0	1891300	366370	599360	1254300	2745000	579620
A0ZNJ2;Q99L13	tr|A0ZNJ2|A0ZNJ2_MOUSE 3-hydroxyisobutyrate dehydrogenase OS=Mus musculus GN=Hibadh PE=2 SV=1;sp|Q99L13|3HIDH_MOUSE 3-hydroxyisobutyrate dehydrogenase, mitochondrial OS=Mus musculus GN=Hibadh PE=1 SV=1	2	1	1	1	3	35.523		1574500	0	0	0	366500	342510	587320	0	278140	0
A1A4T2;Q8BHN3;Q3UE86	tr|A1A4T2|A1A4T2_MOUSE Alpha glucosidase 2 alpha neutral subunit OS=Mus musculus GN=Ganab PE=2 SV=1;sp|Q8BHN3|GANAB_MOUSE Neutral alpha-glucosidase AB OS=Mus musculus GN=Ganab PE=1 SV=1;tr|Q3UE86|Q3UE86_MOUSE Uncharacterized protein (Fragment) OS=Mus muscu	3	20	20	20	22.6	109.4		98130000	8811100	7205600	6721600	10610000	9071700	15593000	11659000	13554000	14903000
Q3UG53;A1A553;Q5DTS2;O55098	tr|Q3UG53|Q3UG53_MOUSE Uncharacterized protein OS=Mus musculus GN=Stk10 PE=2 SV=1;tr|A1A553|A1A553_MOUSE Serine/threonine kinase 10 OS=Mus musculus GN=Stk10 PE=2 SV=1;tr|Q5DTS2|Q5DTS2_MOUSE MKIAA4026 protein (Fragment) OS=Mus musculus GN=Stk10 PE=2 SV=1;sp	4	10	10	8	12.7	111.84		46854000	3818000	3242800	2588500	6212500	8874300	4615000	4375500	6990700	6136900
Q5EBK8;Q9DAS3;A1E5T5;P51807	tr|Q5EBK8|Q5EBK8_MOUSE Dynlt1 protein OS=Mus musculus GN=Dynlt1 PE=2 SV=1;tr|Q9DAS3|Q9DAS3_MOUSE Uncharacterized protein OS=Mus musculus PE=2 SV=1;tr|A1E5T5|A1E5T5_MOUSE Tctex-1 OS=Mus musculus PE=2 SV=1;sp|P51807|DYLT1_MOUSE Dynein light chain Tctex-type	4	2	2	2	36.6	10.242		117130000	0	6507800	22170000	10150000	8996400	17542000	16824000	12472000	22470000
A1ILG8;Q8BX70;A1ILH1;A1ILH0;A1ILG9;A0A1L1SUY8	tr|A1ILG8|A1ILG8_MOUSE Chorein OS=Mus musculus GN=Vps13c PE=2 SV=1;sp|Q8BX70|VP13C_MOUSE Vacuolar protein sorting-associated protein 13C OS=Mus musculus GN=Vps13c PE=1 SV=2;tr|A1ILH1|A1ILH1_MOUSE Chorein (Fragment) OS=Mus musculus GN=Vps13c PE=2 SV=1;tr|A1	6	2	2	2	0.6	420.08		570220	82403	146270	208280	0	0	0	63670	0	69598
A1L0V6;A7YY79;Q6Q899;A2AP29;Q3U1I9;Q3KQQ7;Q05CC6;Q8C6Y8	tr|A1L0V6|A1L0V6_MOUSE Ddx58 protein (Fragment) OS=Mus musculus GN=Ddx58 PE=2 SV=1;tr|A7YY79|A7YY79_MOUSE Ddx58 protein (Fragment) OS=Mus musculus GN=Ddx58 PE=2 SV=1;sp|Q6Q899|DDX58_MOUSE Probable ATP-dependent RNA helicase DDX58 OS=Mus musculus GN=Ddx58 P	8	5	5	5	5.3	105.68		8587800	830080	1299300	1251000	419560	421660	1116600	1436400	266540	1546600
Z4YJW0;A1L2Z3;Q8C7X2;A0A1Y7VP81	tr|Z4YJW0|Z4YJW0_MOUSE ER membrane protein complex subunit 1 OS=Mus musculus GN=Emc1 PE=1 SV=1;tr|A1L2Z3|A1L2Z3_MOUSE C230096C10Rik protein OS=Mus musculus GN=Emc1 PE=2 SV=1;sp|Q8C7X2|EMC1_MOUSE ER membrane protein complex subunit 1 OS=Mus musculus GN=Emc1	4	2	2	2	2.7	111.56		1293200	204690	237230	223880	0	0	0	0	287050	340370
E9QN37;A1L314;Q80VB7	tr|E9QN37|E9QN37_MOUSE Macrophage-expressed gene 1 protein OS=Mus musculus GN=Mpeg1 PE=1 SV=1;sp|A1L314|MPEG1_MOUSE Macrophage-expressed gene 1 protein OS=Mus musculus GN=Mpeg1 PE=1 SV=1	3	5	5	5	9	79.109		9089100	631370	281090	877440	1278900	564150	2209600	1380700	884680	981090
Q8BTS0;A1L333;Q5U222;Q3V0Z8;Q61656;Q3UXW3;S4R1I6;Q9CSD9;B1ARB9;B1ARC0;O35662;S4R1E3;Q921Y3	tr|Q8BTS0|Q8BTS0_MOUSE DEAD (Asp-Glu-Ala-Asp) box polypeptide 5 OS=Mus musculus GN=Ddx5 PE=1 SV=1;tr|A1L333|A1L333_MOUSE DEAD (Asp-Glu-Ala-Asp) box polypeptide 5 OS=Mus musculus GN=Ddx5 PE=2 SV=1;tr|Q5U222|Q5U222_MOUSE Ddx5 protein (Fragment) OS=Mus muscul	13	26	26	17	42.9	69.265		536560000	47153000	32220000	33600000	61112000	68146000	76644000	68352000	69387000	79949000
A1L367;A1L366;Q6ZQJ6;Q3UTE4;Q3TG35;Q61550	tr|A1L367|A1L367_MOUSE RAD21 homolog (S. pombe) OS=Mus musculus GN=Rad21 PE=2 SV=1;tr|A1L366|A1L366_MOUSE RAD21 homolog (S. pombe) OS=Mus musculus GN=Rad21 PE=2 SV=1;tr|Q6ZQJ6|Q6ZQJ6_MOUSE MKIAA0078 protein (Fragment) OS=Mus musculus GN=Rad21 PE=2 SV=1;tr|	6	8	8	8	15.9	72.022		13694000	848940	4136400	1661100	195440	0	2073700	521190	2911600	1345300
A1L3B8;P26516	tr|A1L3B8|A1L3B8_MOUSE Proteasome (Prosome, macropain) 26S subunit, non-ATPase, 7 OS=Mus musculus GN=Psmd7 PE=1 SV=1;sp|P26516|PSMD7_MOUSE 26S proteasome non-ATPase regulatory subunit 7 OS=Mus musculus GN=Psmd7 PE=1 SV=2	2	4	4	4	11.8	36.539		102230000	11085000	10890000	10447000	12592000	7149600	13231000	10360000	11278000	15195000
A1L3S7;Q8VHR5;Q69ZQ5;A0A0U1RNM2	tr|A1L3S7|A1L3S7_MOUSE Gatad2b protein OS=Mus musculus GN=Gatad2b PE=1 SV=1;sp|Q8VHR5|P66B_MOUSE Transcriptional repressor p66-beta OS=Mus musculus GN=Gatad2b PE=1 SV=1;tr|Q69ZQ5|Q69ZQ5_MOUSE MKIAA1150 protein (Fragment) OS=Mus musculus GN=Gatad2b PE=2 SV=	4	4	3	3	10.7	63.638		8742700	846800	1228700	1829100	755420	352740	375220	814960	1194000	1345800
A8XY17;A2A4J8;Q9CQ80	tr|A8XY17|A8XY17_MOUSE Vacuolar protein-sorting-associated protein 25 OS=Mus musculus GN=Vps25 PE=1 SV=1;tr|A2A4J8|A2A4J8_MOUSE Vacuolar protein-sorting-associated protein 25 OS=Mus musculus GN=Vps25 PE=1 SV=1;sp|Q9CQ80|VPS25_MOUSE Vacuolar protein-sorting	3	1	1	1	7.8	14.957		20796000	7010400	4741900	3262900	5781000	0	0	0	0	0
A2A4Z1;Q3UWQ1;A2A4Z0;Q9D1C1	tr|A2A4Z1|A2A4Z1_MOUSE Ubiquitin-conjugating enzyme E2 C OS=Mus musculus GN=Ube2c PE=1 SV=1;tr|Q3UWQ1|Q3UWQ1_MOUSE Uncharacterized protein OS=Mus musculus GN=Ube2c PE=2 SV=1;tr|A2A4Z0|A2A4Z0_MOUSE Ubiquitin-conjugating enzyme E2C OS=Mus musculus GN=Ube2c P	4	1	1	1	7.6	18.474		5692500	1575800	1228200	1007200	0	0	725410	0	1155900	0
A2A547;Q5I0T8;P84099	tr|A2A547|A2A547_MOUSE Ribosomal protein L19 OS=Mus musculus GN=Rpl19 PE=1 SV=1;tr|Q5I0T8|Q5I0T8_MOUSE Ribosomal protein L19 OS=Mus musculus GN=Rpl19 PE=1 SV=1;sp|P84099|RL19_MOUSE 60S ribosomal protein L19 OS=Mus musculus GN=Rpl19 PE=1 SV=1	3	4	4	4	21.1	23.247		772520000	101740000	104470000	102880000	68819000	37577000	91914000	72293000	110430000	82398000
Q9D6Z9;A2A590;A2A588;Q3V2D6;Q3V2C1	tr|Q9D6Z9|Q9D6Z9_MOUSE Uncharacterized protein OS=Mus musculus GN=Krtap1-5 PE=2 SV=1;tr|A2A590|A2A590_MOUSE Keratin-associated protein 1-5 OS=Mus musculus GN=Krtap1-5 PE=2 SV=1;tr|A2A588|A2A588_MOUSE Keratin-associated protein 1-3 OS=Mus musculus GN=Krtap1	5	1	1	1	8.2	12.455		11424000	0	0	0	0	0	11424000	0	0	0
A2A5N2;Q9CQV8;A2A5N1	tr|A2A5N2|A2A5N2_MOUSE Tyrosine 3-monooxygenase/tryptophan 5-monooxygenase activation protein, beta polypeptide OS=Mus musculus GN=Ywhab PE=2 SV=1;sp|Q9CQV8|1433B_MOUSE 14-3-3 protein beta/alpha OS=Mus musculus GN=Ywhab PE=1 SV=3;tr|A2A5N1|A2A5N1_MOUSE 14-	3	11	7	6	52.8	28.086		819220000	82165000	69631000	63317000	83977000	93190000	121590000	84252000	108680000	112420000
A2A5V3;A2A5V2;P55194;S4R2D3;S4R2T6;A2A5V1	tr|A2A5V3|A2A5V3_MOUSE SH3 domain-binding protein 1 OS=Mus musculus GN=Sh3bp1 PE=1 SV=1;tr|A2A5V2|A2A5V2_MOUSE SH3 domain-binding protein 1 OS=Mus musculus GN=Sh3bp1 PE=1 SV=1;sp|P55194|3BP1_MOUSE SH3 domain-binding protein 1 OS=Mus musculus GN=Sh3bp1 PE=1	6	11	11	11	24.4	64.462		78066000	7780000	6715300	8039100	7341200	6833000	12891000	8363900	12598000	7505900
A2A6M1;Q9CZ28	tr|A2A6M1|A2A6M1_MOUSE Vacuolar-sorting protein SNF8 OS=Mus musculus GN=Snf8 PE=1 SV=1;sp|Q9CZ28|SNF8_MOUSE Vacuolar-sorting protein SNF8 OS=Mus musculus GN=Snf8 PE=1 SV=1	2	2	2	2	11.2	25.968		40724000	4916100	6948500	7475800	2260300	1686900	5549100	3295200	3873500	4718300
A2A6U3;Q80UG5;Q3TDR9;A2A6U5;A8Y5D3	tr|A2A6U3|A2A6U3_MOUSE Septin-9 OS=Mus musculus GN=Sept9 PE=1 SV=1;sp|Q80UG5|SEPT9_MOUSE Septin-9 OS=Mus musculus GN=Sept9 PE=1 SV=1;tr|Q3TDR9|Q3TDR9_MOUSE Uncharacterized protein OS=Mus musculus GN=Sept9 PE=2 SV=1;tr|A2A6U5|A2A6U5_MOUSE Septin-9 (Fragment	5	6	6	6	12	63.772		82680000	7792200	10311000	16734000	6524600	5251000	9387500	9408200	7576800	9694100
A2A763;Q7TPS7;Q3U114;P70353	tr|A2A763|A2A763_MOUSE Nuclear transcription factor Y subunit gamma (Fragment) OS=Mus musculus GN=Nfyc PE=1 SV=1;tr|Q7TPS7|Q7TPS7_MOUSE Nuclear transcription factor Y subunit gamma OS=Mus musculus GN=Nfyc PE=2 SV=1;tr|Q3U114|Q3U114_MOUSE Nuclear transcript	4	1	1	1	8.2	11.371		26336000	4986700	6293300	5473600	0	0	4305000	0	0	5277800
Q8QZU3;A2A7A7;Q8CFX1	tr|Q8QZU3|Q8QZU3_MOUSE H6pd protein (Fragment) OS=Mus musculus GN=H6pd PE=2 SV=1;tr|A2A7A7|A2A7A7_MOUSE GDH/6PGL endoplasmic bifunctional protein OS=Mus musculus GN=H6pd PE=1 SV=1;sp|Q8CFX1|G6PE_MOUSE GDH/6PGL endoplasmic bifunctional protein OS=Mus muscul	3	3	3	3	12.5	34.607		61114000	5075400	3526800	3916900	6859200	7287300	10402000	6279700	8374400	9391800
A2A7S7;Q91WQ3;F6VXZ2	tr|A2A7S7|A2A7S7_MOUSE Tyrosine--tRNA ligase OS=Mus musculus GN=Yars PE=1 SV=1;sp|Q91WQ3|SYYC_MOUSE Tyrosine--tRNA ligase, cytoplasmic OS=Mus musculus GN=Yars PE=1 SV=3	3	6	6	6	12.8	63.001		6323400	349390	551260	1107200	413950	545150	484040	809490	493030	1569900
A2A7Z4;Q78IG7;Q9CQH7	tr|A2A7Z4|A2A7Z4_MOUSE Transcription factor BTF3 OS=Mus musculus GN=Btf3l4 PE=1 SV=1;tr|Q78IG7|Q78IG7_MOUSE Transcription factor BTF3 (Fragment) OS=Mus musculus GN=Btf3l4 PE=2 SV=1;sp|Q9CQH7|BT3L4_MOUSE Transcription factor BTF3 homolog 4 OS=Mus musculus G	3	4	4	4	36.1	17.27		44481000	5776600	8334300	0	5847500	5672800	5565400	5065800	2229000	5989400
A2A813;Q99LX0;A2A815;D3K2X3;A2A817;A2A816	tr|A2A813|A2A813_MOUSE Protein/nucleic acid deglycase DJ-1 OS=Mus musculus GN=Park7 PE=1 SV=1;sp|Q99LX0|PARK7_MOUSE Protein/nucleic acid deglycase DJ-1 OS=Mus musculus GN=Park7 PE=1 SV=1;tr|A2A815|A2A815_MOUSE Protein/nucleic acid deglycase DJ-1 (Fragment)	6	7	7	7	50.3	18.474		616410000	67278000	86149000	86934000	61181000	42361000	74682000	67622000	65640000	64560000
A2A821;A8Y5E7;Q6P078;B2RSR5;Q8BVM4	tr|A2A821|A2A821_MOUSE Antizyme inhibitor 2 (Fragment) OS=Mus musculus GN=Azin2 PE=4 SV=8;tr|A8Y5E7|A8Y5E7_MOUSE Antizyme inhibitor 2 OS=Mus musculus GN=Azin2 PE=3 SV=1;tr|Q6P078|Q6P078_MOUSE Adc protein (Fragment) OS=Mus musculus GN=Azin2 PE=2 SV=1;tr|B2R	5	1	1	1	3	24.948		9300100	0	0	0	1760600	561980	2359700	2420100	2197700	0
E9QKA4;A2A8V8;A2A8V9;E9PUK6;Q52KI8;A2A983;F7BWM1	tr|E9QKA4|E9QKA4_MOUSE Serine/arginine repetitive matrix protein 1 OS=Mus musculus GN=Srrm1 PE=1 SV=1;tr|A2A8V8|A2A8V8_MOUSE Serine/arginine repetitive matrix protein 1 OS=Mus musculus GN=Srrm1 PE=1 SV=1;tr|A2A8V9|A2A8V9_MOUSE Serine/arginine repetitive ma	7	3	3	3	3.6	101.16		10114000	1332800	749730	1379400	1124300	912230	1387800	1633700	817540	776880
A6PWC3;Q8R320;A2A9Q2;Q8BHG1;Q8R1H1;Q9Z153;Q3V3G9	tr|A6PWC3|A6PWC3_MOUSE Nardilysin, N-arginine dibasic convertase, NRD convertase 1 OS=Mus musculus GN=Nrd1 PE=1 SV=1;tr|Q8R320|Q8R320_MOUSE Nardilysin, N-arginine dibasic convertase, NRD convertase 1 OS=Mus musculus GN=Nrd1 PE=2 SV=1;tr|A2A9Q2|A2A9Q2_MOUSE	7	7	7	7	6.5	127.77		8633800	930560	955270	839550	806600	1203300	1408700	295060	1215100	979710
A2A9X5;Q9JM14	tr|A2A9X5|A2A9X5_MOUSE 5(3)-deoxyribonucleotidase, cytosolic type OS=Mus musculus GN=Nt5c PE=1 SV=1;sp|Q9JM14|NT5C_MOUSE 5(3)-deoxyribonucleotidase, cytosolic type OS=Mus musculus GN=Nt5c PE=1 SV=1	2	4	4	4	35.6	21.939		62124000	3404500	975460	0	9595900	10168000	12912000	3990700	10329000	10748000
A2ABY6;A3KMC9;Q8BKJ9	tr|A2ABY6|A2ABY6_MOUSE NAD-dependent protein deacetylase sirtuin-7 (Fragment) OS=Mus musculus GN=Sirt7 PE=1 SV=1;tr|A3KMC9|A3KMC9_MOUSE Sirtuin 7 (Silent mating type information regulation 2, homolog) 7 (S. cerevisiae) OS=Mus musculus GN=Sirt7 PE=2 SV=2;sp	3	1	1	1	9.2	22.173		3928200	0	0	0	0	0	0	999770	1154200	1774200
A2AC16;Q91X52	tr|A2AC16|A2AC16_MOUSE Dicarbonyl L-xylulose reductase, isoform CRA_a OS=Mus musculus GN=Dcxr PE=1 SV=1;sp|Q91X52|DCXR_MOUSE L-xylulose reductase OS=Mus musculus GN=Dcxr PE=1 SV=2	2	1	1	1	6.4	24.99		1965200	0	742820	1222400	0	0	0	0	0	0
Q61833;A2ACG7;Q3U505;Q9DBG6	tr|Q61833|Q61833_MOUSE Ribophorin OS=Mus musculus GN=Rpn2 PE=2 SV=1;tr|A2ACG7|A2ACG7_MOUSE Dolichyl-diphosphooligosaccharide--protein glycosyltransferase subunit 2 OS=Mus musculus GN=Rpn2 PE=1 SV=1;tr|Q3U505|Q3U505_MOUSE Uncharacterized protein (Fragment)	4	14	14	14	35.9	66.301		167230000	11843000	9903700	7840100	16493000	19299000	26018000	25219000	19555000	31061000
A2AD84;A2AD85;Q99JT2	tr|A2AD84|A2AD84_MOUSE Serine/threonine-protein kinase 26 OS=Mus musculus GN=Stk26 PE=1 SV=1;tr|A2AD85|A2AD85_MOUSE Uncharacterized protein OS=Mus musculus GN=Stk26 PE=1 SV=1;sp|Q99JT2|STK26_MOUSE Serine/threonine-protein kinase 26 OS=Mus musculus GN=Stk26	3	6	3	3	19.4	43.952		23916000	2053700	2205200	540520	2350400	2133900	2227900	3822900	4080200	4500900
F6TBV1;F6WHL0;A2ADH1;Q9CQY5	tr|F6TBV1|F6TBV1_MOUSE Magnesium transporter protein 1 (Fragment) OS=Mus musculus GN=Magt1 PE=1 SV=1;tr|F6WHL0|F6WHL0_MOUSE Magnesium transporter protein 1 (Fragment) OS=Mus musculus GN=Magt1 PE=1 SV=1;tr|A2ADH1|A2ADH1_MOUSE Magnesium transporter protein 1	4	2	2	2	6.1	35.154		10861000	2545900	385000	375120	0	0	3448900	3428100	0	678050
A2ADY9	sp|A2ADY9|DDI2_MOUSE Protein DDI1 homolog 2 OS=Mus musculus GN=Ddi2 PE=1 SV=1	1	2	2	2	7.8	44.59		12371000	1965200	1659100	1026700	541090	607400	1571000	2876700	957890	1166400
A2AE15;P11680	tr|A2AE15|A2AE15_MOUSE Complement factor properdin OS=Mus musculus GN=Cfp PE=2 SV=1;sp|P11680|PROP_MOUSE Properdin OS=Mus musculus GN=Cfp PE=2 SV=2	2	2	2	2	4.7	50.327		21038000	3497900	3259000	5569200	0	0	0	2623700	2975300	3113400
A2AE27;Q9DBT5	tr|A2AE27|A2AE27_MOUSE AMP deaminase OS=Mus musculus GN=Ampd2 PE=1 SV=1;sp|Q9DBT5|AMPD2_MOUSE AMP deaminase 2 OS=Mus musculus GN=Ampd2 PE=1 SV=1	2	10	10	10	12.4	94.695		45240000	5219500	3457000	5856700	4196100	5630100	7432600	4896700	3448900	5102900
A2AE89;P10649;F6WHQ7;Q6PJ91;D3YVP6;E9QAC8;D3YVP5;Q80W21;D3YX76;P19639;P15626;F6Y363;D3YZ29;A2AE91;Q8R5I6;Q7M0F3;D3YVP8;Q7M0F4;D3YVP9;E9PV63;E9PVM7;Q9D5J8;G5E8M7;O35660;P48774	tr|A2AE89|A2AE89_MOUSE Glutathione S-transferase Mu 1 OS=Mus musculus GN=Gstm1 PE=1 SV=2;sp|P10649|GSTM1_MOUSE Glutathione S-transferase Mu 1 OS=Mus musculus GN=Gstm1 PE=1 SV=2;tr|F6WHQ7|F6WHQ7_MOUSE Glutathione S-transferase Mu 1 (Fragment) OS=Mus musculu	25	12	12	12	48	28.556		1486200000	142840000	100900000	175270000	165770000	133640000	240060000	172010000	155750000	199950000
A2AER9;A2AER8;A2AER7;Q91VJ5	tr|A2AER9|A2AER9_MOUSE Polyglutamine-binding protein 1 (Fragment) OS=Mus musculus GN=Pqbp1 PE=1 SV=1;tr|A2AER8|A2AER8_MOUSE Polyglutamine-binding protein 1 (Fragment) OS=Mus musculus GN=Pqbp1 PE=1 SV=1;tr|A2AER7|A2AER7_MOUSE Pqbp1 protein OS=Mus musculus G	4	1	1	1	9	11.456		40985000	3869400	3637600	6699300	3484600	4096700	4628200	4582200	4509600	5476900
Q3TZ55;A2AEW6;Q3T9D9;A2AEW5;A2AEW9;A2AEW8;Q8VD04	tr|Q3TZ55|Q3TZ55_MOUSE Uncharacterized protein (Fragment) OS=Mus musculus GN=Gripap1 PE=2 SV=1;tr|A2AEW6|A2AEW6_MOUSE GRIP1-associated protein 1 (Fragment) OS=Mus musculus GN=Gripap1 PE=1 SV=1;tr|Q3T9D9|Q3T9D9_MOUSE Uncharacterized protein (Fragment) OS=Mu	7	1	1	1	3.4	54.569		1287900	273280	129520	0	0	0	0	395310	0	489790
A2AF47;A2AF67;A2AF65	sp|A2AF47|DOC11_MOUSE Dedicator of cytokinesis protein 11 OS=Mus musculus GN=Dock11 PE=1 SV=1;tr|A2AF67|A2AF67_MOUSE Dedicator of cytokinesis protein 11 OS=Mus musculus GN=Dock11 PE=1 SV=1	3	4	4	4	2.4	237.77		1442900	87975	32609	0	242190	251580	135970	273180	164780	254590
A2AFF6;O35638;Q3TG33;D6REF2;Q8C818;F8WHU7;Q9D3E6;D6RHQ7;Q3UQG8;Q8C918;Q3TYZ1;Q3UKR7;Q8BSB5;O70576	tr|A2AFF6|A2AFF6_MOUSE Cohesin subunit SA-2 OS=Mus musculus GN=Stag2 PE=1 SV=1;sp|O35638|STAG2_MOUSE Cohesin subunit SA-2 OS=Mus musculus GN=Stag2 PE=1 SV=3;tr|Q3TG33|Q3TG33_MOUSE Uncharacterized protein (Fragment) OS=Mus musculus GN=Stag2 PE=2 SV=1	14	8	8	8	7.4	145.7		17410000	971030	784330	1353500	1760700	1329800	2912700	2886800	2049100	3362200
A2AFG7;A2AFG8;Q6PGJ3;P11627;B7ZCD3;Q684Q2;Q9QYQ7	tr|A2AFG7|A2AFG7_MOUSE Neural cell adhesion molecule L1 OS=Mus musculus GN=L1cam PE=1 SV=1;tr|A2AFG8|A2AFG8_MOUSE Neural cell adhesion molecule L1 OS=Mus musculus GN=L1cam PE=1 SV=1;tr|Q6PGJ3|Q6PGJ3_MOUSE L1 cell adhesion molecule OS=Mus musculus GN=L1cam	7	2	2	2	1.8	139.82		661670	126130	369790	152230	13529	0	0	0	0	0
A2AFI9;A2AFJ1;Q60973;Q3UX53;Q3UJI2;Q8C5H3;F6ZLC6;F6U539	tr|A2AFI9|A2AFI9_MOUSE Histone-binding protein RBBP7 OS=Mus musculus GN=Rbbp7 PE=1 SV=1;tr|A2AFJ1|A2AFJ1_MOUSE Histone-binding protein RBBP7 OS=Mus musculus GN=Rbbp7 PE=1 SV=1;sp|Q60973|RBBP7_MOUSE Histone-binding protein RBBP7 OS=Mus musculus GN=Rbbp7 PE=	8	8	2	2	20.7	43.595		25223000	1305200	863660	1589800	2323000	5134400	4213300	3000400	4120600	2672400
Q99N15;A2AFQ2;Q9CYT3;O08756	tr|Q99N15|Q99N15_MOUSE 17beta-hydroxysteroid dehydrogenase type 10/short chain L-3-hydroxyacyl-CoA dehydrogenase OS=Mus musculus GN=Hsd17b10 PE=1 SV=1;tr|A2AFQ2|A2AFQ2_MOUSE 3-hydroxyacyl-CoA dehydrogenase type-2 OS=Mus musculus GN=Hsd17b10 PE=1 SV=1;tr|Q9	4	5	5	5	26.8	27.273		115440000	6274400	3546800	6498300	12445000	13038000	18510000	18772000	15314000	21046000
A2AFS0;Q3U6F6;Q8C483;P26638;Q3U8N1;A2AFS1;Q8CEH3	tr|A2AFS0|A2AFS0_MOUSE Serine--tRNA ligase, cytoplasmic (Fragment) OS=Mus musculus GN=Sars PE=1 SV=1;tr|Q3U6F6|Q3U6F6_MOUSE Uncharacterized protein OS=Mus musculus GN=Sars PE=2 SV=1;tr|Q8C483|Q8C483_MOUSE Serine--tRNA ligase, cytoplasmic OS=Mus musculus GN	7	6	6	6	21.3	40.163		59241000	3572500	0	696940	7778800	8543300	11275000	6806200	8851900	11716000
A2AFW6;Q3UA17;Q9D050;Q791V5;D6RCZ1;Q05C68	tr|A2AFW6|A2AFW6_MOUSE Mitochondrial carrier homolog 2 OS=Mus musculus GN=Mtch2 PE=1 SV=1;tr|Q3UA17|Q3UA17_MOUSE Uncharacterized protein OS=Mus musculus GN=Mtch2 PE=2 SV=1;tr|Q9D050|Q9D050_MOUSE Mitochondrial carrier homolog 2 OS=Mus musculus GN=Mtch2 PE=1	6	2	2	2	11.2	32.345		12886000	1869900	0	880720	2062100	1557100	2171800	2877800	1466200	0
Q8BQW4;A2AH25;Q5FWK3;Q8C5A0	tr|Q8BQW4|Q8BQW4_MOUSE Uncharacterized protein OS=Mus musculus GN=Arhgap1 PE=2 SV=1;tr|A2AH25|A2AH25_MOUSE Rho GTPase-activating protein 1 OS=Mus musculus GN=Arhgap1 PE=1 SV=1;sp|Q5FWK3|RHG01_MOUSE Rho GTPase-activating protein 1 OS=Mus musculus GN=Arhgap1	4	11	11	7	30.3	54.441		103300000	8748400	11983000	14608000	9993600	10616000	15506000	8974800	10882000	11984000
Q7TMX4;Q543F1;Q3U5Q3;Q3TMY8;A2AH85;Q6A0E3;O08810;G3UZ34;G3UXK8	tr|Q7TMX4|Q7TMX4_MOUSE Elongation factor Tu GTP binding domain containing 2 OS=Mus musculus GN=Eftud2 PE=2 SV=1;tr|Q543F1|Q543F1_MOUSE Uncharacterized protein OS=Mus musculus GN=Eftud2 PE=1 SV=1;tr|Q3U5Q3|Q3U5Q3_MOUSE Uncharacterized protein OS=Mus musculu	9	14	13	13	19.4	109.3		36145000	2360000	2267200	3528600	3992200	3309600	4955200	5693800	4155800	5883100
A2AHJ7;A2AHK0;Q80UP3;Q91YS0;S4R215;S4R2G0;D3Z519;D3Z2W1;D3YWQ0	tr|A2AHJ7|A2AHJ7_MOUSE Diacylglycerol kinase OS=Mus musculus GN=Dgkz PE=1 SV=1;tr|A2AHK0|A2AHK0_MOUSE Diacylglycerol kinase OS=Mus musculus GN=Dgkz PE=1 SV=1;sp|Q80UP3|DGKZ_MOUSE Diacylglycerol kinase zeta OS=Mus musculus GN=Dgkz PE=1 SV=2;tr|Q91YS0|Q91YS0	9	2	2	2	2.9	105.9		1703100	0	208480	0	220520	174680	274630	230530	230630	363650
Q3TMU2;Q3YAA9;Q3YAB0;A2AHT3;Q9QXT8	tr|Q3TMU2|Q3TMU2_MOUSE Uncharacterized protein OS=Mus musculus GN=Kcnip3 PE=2 SV=1;tr|Q3YAA9|Q3YAA9_MOUSE Calsenilin isoform 4 OS=Mus musculus GN=Kcnip3 PE=1 SV=1;tr|Q3YAB0|Q3YAB0_MOUSE Potassium channel interacting protein 3 OS=Mus musculus GN=Kcnip3 PE=2	5	1	1	1	3.7	24.644		112060000	0	0	0	0	17978000	24421000	24662000	19399000	25599000
A2AIR2;Q5DTM8	tr|A2AIR2|A2AIR2_MOUSE E3 ubiquitin-protein ligase BRE1A (Fragment) OS=Mus musculus GN=Rnf20 PE=1 SV=1;sp|Q5DTM8|BRE1A_MOUSE E3 ubiquitin-protein ligase BRE1A OS=Mus musculus GN=Rnf20 PE=1 SV=2	2	2	2	1	4.1	70.389		1522700	143390	268560	244150	203940	0	288570	0	0	374080
A2AJW4	tr|A2AJW4|A2AJW4_MOUSE Protein phosphatase 1 regulatory subunit OS=Mus musculus GN=Ppp1r3d PE=1 SV=1	1	3	3	3	14.3	30.509		11873000	0	1751400	873180	801480	3178000	1888100	951670	1315700	1113900
A2AKA9;Q4G5Y4;Q3TUI3;Q5CCJ9;Q8K2F0;Q05DR7;Q53TY6;Q3U3Z2;Q3SYK2;B0V2V6;Q63ZX2;Q91Y44	tr|A2AKA9|A2AKA9_MOUSE Bromodomain-containing protein 3 (Fragment) OS=Mus musculus GN=Brd3 PE=1 SV=1;tr|Q4G5Y4|Q4G5Y4_MOUSE Endothelial differentiation inhibitory protein D18 OS=Mus musculus GN=Brd3 PE=2 SV=1;tr|Q3TUI3|Q3TUI3_MOUSE Bromodomain containing 3	12	4	2	2	7.5	75.349		4393300	407450	780730	1058600	275060	0	427370	584310	466770	392950
A2AKH4;Q9D3L3;O09044;B0R030;B0R029;E9Q8A1;P60879	tr|A2AKH4|A2AKH4_MOUSE Synaptosomal-associated protein OS=Mus musculus GN=Snap23 PE=1 SV=1;tr|Q9D3L3|Q9D3L3_MOUSE Synaptosomal-associated protein OS=Mus musculus GN=Snap23 PE=1 SV=1;sp|O09044|SNP23_MOUSE Synaptosomal-associated protein 23 OS=Mus musculus G	7	4	4	4	27.6	23.261		31546000	2773100	6162700	5784300	2249000	2345300	2694700	1256600	4506300	3774100
A2AKH7;Q8JZX5;Q9CTX7;Q9CSK4;Q9D1G5	tr|A2AKH7|A2AKH7_MOUSE Leucine-rich repeat-containing protein 57 (Fragment) OS=Mus musculus GN=Lrrc57 PE=1 SV=8;tr|Q8JZX5|Q8JZX5_MOUSE Leucine rich repeat containing 57 OS=Mus musculus GN=Lrrc57 PE=1 SV=1;tr|Q9CTX7|Q9CTX7_MOUSE Uncharacterized protein (Fra	5	2	2	2	11	24.132		6261100	1202000	1584100	1795800	0	0	0	1063900	615190	0
A2AKV1;A2AKV2;A2AKV3;Q8C2Q8;A2AKU9;Q9ERA8;Q9D9D7;Q3UD06;Q91VR2;A2AKV0	tr|A2AKV1|A2AKV1_MOUSE ATP synthase subunit gamma, mitochondrial (Fragment) OS=Mus musculus GN=Atp5c1 PE=1 SV=1;tr|A2AKV2|A2AKV2_MOUSE ATP synthase subunit gamma, mitochondrial (Fragment) OS=Mus musculus GN=Atp5c1 PE=1 SV=1;tr|A2AKV3|A2AKV3_MOUSE ATP synth	10	3	3	3	22.7	16.762		199750000	19530000	23112000	7649200	27032000	35282000	22505000	35565000	22736000	6340300
A2AKX3	sp|A2AKX3|SETX_MOUSE Probable helicase senataxin OS=Mus musculus GN=Setx PE=1 SV=1	1	1	1	1	0.3	297.59		6899200	0	1440100	0	0	0	0	1333100	1375200	2750800
A2AL12;Q5FB19;Q8BG05;Q6P6I7;Q3UZG3	tr|A2AL12|A2AL12_MOUSE Heterogeneous nuclear ribonucleoprotein A3 OS=Mus musculus GN=Hnrnpa3 PE=1 SV=1;tr|Q5FB19|Q5FB19_MOUSE Heterogeneous nuclear ribonucleoprotein A3 OS=Mus musculus GN=Hnrnpa3 PE=2 SV=1;sp|Q8BG05|ROA3_MOUSE Heterogeneous nuclear ribonuc	5	10	1	1	38.4	34.476		128180000	10246000	16016000	31164000	8200200	11358000	14987000	14650000	10311000	11250000
A2AL50;Q8C0I1;H3BKN2;A2AL49;Q8BKC4;Q3TNW8;H3BIY5;H3BJ14	tr|A2AL50|A2AL50_MOUSE Alkylglycerone-phosphate synthase OS=Mus musculus GN=Agps PE=1 SV=1;sp|Q8C0I1|ADAS_MOUSE Alkyldihydroxyacetonephosphate synthase, peroxisomal OS=Mus musculus GN=Agps PE=1 SV=1;tr|H3BKN2|H3BKN2_MOUSE Alkylglycerone-phosphate synthase	8	13	13	13	28.6	74.342		66081000	4015400	4671600	7197600	6595300	8340500	8407900	10778000	7420300	8654200
Q8K4Q1;Q548R5;Q3UZ60;A2ALK0;P09084	tr|Q8K4Q1|Q8K4Q1_MOUSE Pax1 protein (Fragment) OS=Mus musculus GN=Pax1 PE=2 SV=1;tr|Q548R5|Q548R5_MOUSE PAX1 OS=Mus musculus GN=Pax1 PE=2 SV=1;tr|Q3UZ60|Q3UZ60_MOUSE Uncharacterized protein OS=Mus musculus GN=Pax1 PE=2 SV=1;tr|A2ALK0|A2ALK0_MOUSE Paired bo	5	1	1	1	6.6	23.026		218930000	0	0	0	0	0	0	78907000	64148000	75875000
I7HJS1;A2AM95;O08579;Q3THM8;B7FAU5	tr|I7HJS1|I7HJS1_MOUSE Emerin OS=Mus musculus GN=Emd PE=1 SV=1;tr|A2AM95|A2AM95_MOUSE Emerin OS=Mus musculus GN=Emd PE=4 SV=1;sp|O08579|EMD_MOUSE Emerin OS=Mus musculus GN=Emd PE=1 SV=1;tr|Q3THM8|Q3THM8_MOUSE Emerin OS=Mus musculus GN=Emd PE=1 SV=1;tr|B7FA	5	2	2	2	9.4	25.134		29773000	4477500	3920000	2988200	2467000	1488400	5216200	1240000	6135000	1840500
I7HLV2;Q3THJ6;A2AM97;Q6ZWV3;P86048;A0A1B0GXC3;B7FAU6;O89059	tr|I7HLV2|I7HLV2_MOUSE 60S ribosomal protein L10 (Fragment) OS=Mus musculus GN=Rpl10 PE=1 SV=1;tr|Q3THJ6|Q3THJ6_MOUSE Uncharacterized protein OS=Mus musculus PE=2 SV=1;tr|A2AM97|A2AM97_MOUSE Ribosomal protein 10 OS=Mus musculus GN=RP23-436K3.4-001 PE=4 SV=	8	6	6	6	38.8	23.072		679870000	77653000	80209000	72086000	76866000	31688000	88340000	81759000	69336000	101930000
A2AMD0;I3PQW3;Q05CL8	tr|A2AMD0|A2AMD0_MOUSE Predicted gene 12666 (Fragment) OS=Mus musculus GN=Gm12666 PE=1 SV=1;tr|I3PQW3|I3PQW3_MOUSE LARP7 OS=Mus musculus GN=Larp7 PE=4 SV=1;sp|Q05CL8|LARP7_MOUSE La-related protein 7 OS=Mus musculus GN=Larp7 PE=1 SV=2	3	1	1	1	5.5	28.465		8589000	805540	983000	1363600	856240	743400	1131500	0	1118000	1587800
Q6PBC0;A2AMQ5;Q99L43	tr|Q6PBC0|Q6PBC0_MOUSE Cds2 protein OS=Mus musculus GN=Cds2 PE=1 SV=1;tr|A2AMQ5|A2AMQ5_MOUSE Phosphatidate cytidylyltransferase OS=Mus musculus GN=Cds2 PE=1 SV=1;sp|Q99L43|CDS2_MOUSE Phosphatidate cytidylyltransferase 2 OS=Mus musculus GN=Cds2 PE=1 SV=1	3	1	1	1	14.7	14.931		33407000	3319500	5660300	6276100	2262000	3016100	4301200	0	4143700	4428200
A2AN08;Z4YMA7;A2VCS3;F6SSP6	sp|A2AN08|UBR4_MOUSE E3 ubiquitin-protein ligase UBR4 OS=Mus musculus GN=Ubr4 PE=1 SV=1;tr|Z4YMA7|Z4YMA7_MOUSE E3 ubiquitin-protein ligase UBR4 (Fragment) OS=Mus musculus GN=Ubr4 PE=1 SV=1	4	5	5	5	1.3	572.28		1383500	150650	60121	134750	83369	199540	151500	237250	189550	176760
B7ZCM0;B7ZCL9;Q684Q6;B7ZCL8;A2AN84;Q542P4;P70290;D6RFD5;B7ZCM1;Q3THA8	tr|B7ZCM0|B7ZCM0_MOUSE 55 kDa erythrocyte membrane protein (Fragment) OS=Mus musculus GN=Mpp1 PE=1 SV=1;tr|B7ZCL9|B7ZCL9_MOUSE 55 kDa erythrocyte membrane protein (Fragment) OS=Mus musculus GN=Mpp1 PE=1 SV=1;tr|Q684Q6|Q684Q6_MOUSE Membrane protein, palmito	10	2	2	2	18.6	17.492		317810000	37362000	0	0	2742800	3723500	3033200	44675000	100300000	125970000
A2AP32;A2AP31;Q3UIU2	tr|A2AP32|A2AP32_MOUSE NADH dehydrogenase [ubiquinone] 1 beta subcomplex subunit 6 OS=Mus musculus GN=Ndufb6 PE=1 SV=1;tr|A2AP31|A2AP31_MOUSE MCG9810 OS=Mus musculus GN=Ndufb6 PE=1 SV=1;sp|Q3UIU2|NDUB6_MOUSE NADH dehydrogenase [ubiquinone] 1 beta subcomple	3	1	1	1	18.6	11.741		6510600	0	0	0	699490	918910	1447300	952280	1002800	1489800
A2AP78;Q544R9;O54879	tr|A2AP78|A2AP78_MOUSE High mobility group protein B3 (Fragment) OS=Mus musculus GN=Hmgb3 PE=1 SV=1;tr|Q544R9|Q544R9_MOUSE High mobility group box 3 OS=Mus musculus GN=Hmgb3 PE=1 SV=1;sp|O54879|HMGB3_MOUSE High mobility group protein B3 OS=Mus musculus GN=	3	4	4	4	25.2	18.311		381370000	53276000	43326000	51307000	28434000	31591000	44462000	53542000	37308000	38120000
A2AP88;Q8BYK8	tr|A2AP88|A2AP88_MOUSE Zinc finger CCCH domain-containing protein 6 OS=Mus musculus GN=Zc3h6 PE=1 SV=1;sp|Q8BYK8|ZC3H6_MOUSE Zinc finger CCCH domain-containing protein 6 OS=Mus musculus GN=Zc3h6 PE=2 SV=2	2	1	1	1	0.6	131.26		4291500	1583200	0	0	0	0	1932200	776130	0	0
Q3UNN2;Q3U8S1;Q3U468;A2APM5;A2APM3;A2APM4;E9QKM8;Q80X37;A2APM1;A2APM2;P15379;Q3TLT9	tr|Q3UNN2|Q3UNN2_MOUSE Uncharacterized protein OS=Mus musculus GN=Cd44 PE=2 SV=1;tr|Q3U8S1|Q3U8S1_MOUSE CD44 antigen OS=Mus musculus GN=Cd44 PE=1 SV=1;tr|Q3U468|Q3U468_MOUSE Uncharacterized protein OS=Mus musculus GN=Cd44 PE=2 SV=1;tr|A2APM5|A2APM5_MOUSE C	12	6	6	6	18.1	40.247		270860000	20044000	23974000	5305500	31345000	24534000	43446000	31577000	42964000	47672000
A2AQ43;A2AQ44;A2AQ42;A2AQ45;A2AQ41;Q80TY0;F6VVN1;A2AQ47;A2AQ39;A0A0A6YWT1;Q61053	tr|A2AQ43|A2AQ43_MOUSE Formin-binding protein 1 OS=Mus musculus GN=Fnbp1 PE=1 SV=1;tr|A2AQ44|A2AQ44_MOUSE Formin-binding protein 1 OS=Mus musculus GN=Fnbp1 PE=1 SV=1;tr|A2AQ42|A2AQ42_MOUSE Formin-binding protein 1 OS=Mus musculus GN=Fnbp1 PE=1 SV=1;tr|A2AQ	11	6	6	6	12.8	64.628		20725000	1922400	1667000	6400400	1060700	2372900	2607800	865950	2073500	1754800
A2AQA9;E9Q1W3;Q61953;Q62411	tr|A2AQA9|A2AQA9_MOUSE Nebulin OS=Mus musculus GN=Neb PE=1 SV=1;tr|E9Q1W3|E9Q1W3_MOUSE Nebulin OS=Mus musculus GN=Neb PE=1 SV=1	4	3	3	3	0.4	800.56		87264000	20662000	13763000	5035800	11727000	9878300	7102100	5799100	7843400	5453300
Q8C4G3;Q8C288;Q505G9;A2AQC3;Q6DI68;O70228	tr|Q8C4G3|Q8C4G3_MOUSE Phospholipid-transporting ATPase OS=Mus musculus GN=Atp9a PE=1 SV=1;tr|Q8C288|Q8C288_MOUSE Phospholipid-transporting ATPase OS=Mus musculus GN=Atp9a PE=1 SV=1;tr|Q505G9|Q505G9_MOUSE Phospholipid-transporting ATPase OS=Mus musculus GN	6	1	1	1	1.2	116.42		4170300	725820	596090	0	607770	602850	814600	0	0	823130
A2AQE4;Q3UK65;Q3V3N6;P61202	tr|A2AQE4|A2AQE4_MOUSE COP9 signalosome complex subunit 2 OS=Mus musculus GN=Cops2 PE=1 SV=1;tr|Q3UK65|Q3UK65_MOUSE Uncharacterized protein OS=Mus musculus GN=Cops2 PE=2 SV=1;tr|Q3V3N6|Q3V3N6_MOUSE Uncharacterized protein OS=Mus musculus GN=Cops2 PE=2 SV=1	4	1	1	1	2.5	46.913		2179600	0	0	452390	438260	357980	0	930980	0	0
A2AQJ7;A2AQJ5;A2AQJ6;Q8BXN9	tr|A2AQJ7|A2AQJ7_MOUSE Transmembrane protein 87A OS=Mus musculus GN=Tmem87a PE=1 SV=1;tr|A2AQJ5|A2AQJ5_MOUSE Transmembrane protein 87A OS=Mus musculus GN=Tmem87a PE=1 SV=1;tr|A2AQJ6|A2AQJ6_MOUSE Transmembrane protein 87A OS=Mus musculus GN=Tmem87a PE=1 SV=	4	1	1	1	2.4	57.011		1379900	0	0	0	230840	0	367620	349190	432270	0
A2AQR0;Q64521	tr|A2AQR0|A2AQR0_MOUSE Glycerol-3-phosphate dehydrogenase OS=Mus musculus GN=Gpd2 PE=1 SV=1;sp|Q64521|GPDM_MOUSE Glycerol-3-phosphate dehydrogenase, mitochondrial OS=Mus musculus GN=Gpd2 PE=1 SV=2	2	10	10	10	17.6	82.829		28089000	1112600	559440	492290	2944100	3848300	4880700	4119000	3936400	6196500
A2ARI0;Q0P5W2;Q8C0L0;A2ARI1	tr|A2ARI0|A2ARI0_MOUSE Thioredoxin-related transmembrane protein 4 OS=Mus musculus GN=Tmx4 PE=1 SV=1;tr|Q0P5W2|Q0P5W2_MOUSE MCG129075 OS=Mus musculus GN=Tmx4 PE=1 SV=1;sp|Q8C0L0|TMX4_MOUSE Thioredoxin-related transmembrane protein 4 OS=Mus musculus GN=Tmx4	4	4	4	4	26.8	20.522		104050000	1092400	0	0	11904000	20767000	29552000	4820600	18312000	17600000
A2ASC6;Q6PAS9;Q8CBU3;Q8C570	tr|A2ASC6|A2ASC6_MOUSE mRNA export factor (Fragment) OS=Mus musculus GN=Rae1 PE=1 SV=1;tr|Q6PAS9|Q6PAS9_MOUSE Rae1 protein OS=Mus musculus GN=Rae1 PE=2 SV=1;tr|Q8CBU3|Q8CBU3_MOUSE Uncharacterized protein OS=Mus musculus PE=2 SV=1;sp|Q8C570|RAE1L_MOUSE mRNA	4	2	2	2	16.7	22.241		21397000	0	0	0	3416800	2328200	3705000	1665600	2680900	7600700
A2ASW6;Q3TRG2;Q9ESL4	tr|A2ASW6|A2ASW6_MOUSE Mitogen-activated protein kinase kinase kinase 20 (Fragment) OS=Mus musculus GN=Map3k20 PE=1 SV=8;tr|Q3TRG2|Q3TRG2_MOUSE Uncharacterized protein OS=Mus musculus GN=Map3k20 PE=2 SV=1;sp|Q9ESL4|M3K20_MOUSE Mitogen-activated protein kin	3	1	1	1	14.9	8.3576		4343800	0	1648100	2695700	0	0	0	0	0	0
Q3V458;A2ATI8;A2ATI6;Q3TG07;A2ATI9;Q3TX06;Q3TIK1;Q99JX3	tr|Q3V458|Q3V458_MOUSE Uncharacterized protein OS=Mus musculus GN=Gorasp2 PE=2 SV=1;tr|A2ATI8|A2ATI8_MOUSE Golgi reassembly-stacking protein 2 OS=Mus musculus GN=Gorasp2 PE=1 SV=1;tr|A2ATI6|A2ATI6_MOUSE Golgi reassembly stacking protein 2, isoform CRA_c OS	8	2	2	2	9.9	29.769		63555000	7234900	5464600	9867800	4580700	4045000	6601400	10002000	5510800	10248000
A2ATQ5;B7ZNX2;P53995	tr|A2ATQ5|A2ATQ5_MOUSE Anaphase-promoting complex subunit 1 OS=Mus musculus GN=Anapc1 PE=1 SV=1;tr|B7ZNX2|B7ZNX2_MOUSE Anaphase promoting complex subunit 1 OS=Mus musculus GN=Anapc1 PE=2 SV=1;sp|P53995|APC1_MOUSE Anaphase-promoting complex subunit 1 OS=Mus	3	2	2	2	1.7	134.72		9123200	0	0	0	0	34050	0	3286300	2647200	3155700
A2ATU9;Q8BY71	tr|A2ATU9|A2ATU9_MOUSE Histone acetyltransferase type B catalytic subunit OS=Mus musculus GN=Hat1 PE=1 SV=1;sp|Q8BY71|HAT1_MOUSE Histone acetyltransferase type B catalytic subunit OS=Mus musculus GN=Hat1 PE=1 SV=1	2	2	2	2	7.8	50.182		10069000	1039500	0	601930	1200300	1171300	1313200	1525800	1630000	1586700
Q3TAI4;Q9CZ22;A2AUD5;Q9CYZ2;Q3TUJ9;Q8BKP1;F6VQ81;V9GWU5	tr|Q3TAI4|Q3TAI4_MOUSE Tumor protein D52-like 2, isoform CRA_c OS=Mus musculus GN=Tpd52l2 PE=1 SV=1;tr|Q9CZ22|Q9CZ22_MOUSE Uncharacterized protein OS=Mus musculus GN=Tpd52l2 PE=2 SV=1;tr|A2AUD5|A2AUD5_MOUSE Tumor protein D54 OS=Mus musculus GN=Tpd52l2 PE=1	8	9	9	9	50	22.466		146710000	21156000	21533000	19679000	12591000	8288300	18753000	11653000	16942000	16115000
A2AUE1;G5E8T0;Q921J3;P60904	tr|A2AUE1|A2AUE1_MOUSE DnaJ homolog subfamily C member 5 (Fragment) OS=Mus musculus GN=Dnajc5 PE=1 SV=1;tr|G5E8T0|G5E8T0_MOUSE DnaJ (Hsp40) homolog, subfamily C, member 5, isoform CRA_b OS=Mus musculus GN=Dnajc5 PE=1 SV=1;tr|Q921J3|Q921J3_MOUSE Dnajc5 prot	4	2	2	2	20.6	15.819		41525000	5588600	2257100	3556500	3222400	4073400	5435200	5360900	6884200	5146300
A2AVJ7;Q99PL5;Q6ZPS0;Q3ULC0;Q8CAB9	tr|A2AVJ7|A2AVJ7_MOUSE Ribosome-binding protein 1 OS=Mus musculus GN=Rrbp1 PE=1 SV=1;sp|Q99PL5|RRBP1_MOUSE Ribosome-binding protein 1 OS=Mus musculus GN=Rrbp1 PE=1 SV=2;tr|Q6ZPS0|Q6ZPS0_MOUSE MKIAA1398 protein (Fragment) OS=Mus musculus GN=Rrbp1 PE=2 SV=1	5	9	9	9	8.3	158.39		13559000	1520800	2396500	1107100	1166000	736820	1478300	1034900	1355900	2763200
A2AVR9;P62627	tr|A2AVR9|A2AVR9_MOUSE Dynein light chain roadblock OS=Mus musculus GN=Dynlrb1 PE=1 SV=1;sp|P62627|DLRB1_MOUSE Dynein light chain roadblock-type 1 OS=Mus musculus GN=Dynlrb1 PE=1 SV=3	2	2	2	2	31.7	11.928		35126000	4271300	0	0	0	0	5917200	4898600	5897600	14141000
A2AW05;Q05DR5;Q08943	tr|A2AW05|A2AW05_MOUSE FACT complex subunit SSRP1 (Fragment) OS=Mus musculus GN=Ssrp1 PE=1 SV=1;tr|Q05DR5|Q05DR5_MOUSE FACT complex subunit SSRP1 (Fragment) OS=Mus musculus GN=Ssrp1 PE=2 SV=1;sp|Q08943|SSRP1_MOUSE FACT complex subunit SSRP1 OS=Mus musculus	3	8	8	8	16.7	71.527		64720000	6568600	4149300	4947300	6934400	5033100	9921000	7626200	9416100	10124000
A2AWF8;A2AWF9;E9Q4S7;Q64455;Q3V2L7;Q61373	tr|A2AWF8|A2AWF8_MOUSE Receptor-type tyrosine-protein phosphatase eta OS=Mus musculus GN=Ptprj PE=1 SV=1;tr|A2AWF9|A2AWF9_MOUSE Receptor-type tyrosine-protein phosphatase eta OS=Mus musculus GN=Ptprj PE=1 SV=1;tr|E9Q4S7|E9Q4S7_MOUSE Receptor-type tyrosine-	6	2	2	2	2.5	128.71		3070100	475930	152400	0	235150	252770	151210	251590	711960	839110
A2AWT6;Q9DBH1;A2AWT7;A2AWT5;P25976	tr|A2AWT6|A2AWT6_MOUSE Nucleolar transcription factor 1 OS=Mus musculus GN=Ubtf PE=1 SV=1;tr|Q9DBH1|Q9DBH1_MOUSE Uncharacterized protein OS=Mus musculus GN=Ubtf PE=2 SV=1;tr|A2AWT7|A2AWT7_MOUSE Nucleolar transcription factor 1 OS=Mus musculus GN=Ubtf PE=1	5	2	2	2	3.9	85.009		6281200	421210	520260	632040	584120	397280	912590	593070	1067200	1153400
A2BDX3;Q14BE0	sp|A2BDX3|MOCS3_MOUSE Adenylyltransferase and sulfurtransferase MOCS3 OS=Mus musculus GN=Mocs3 PE=1 SV=1;tr|Q14BE0|Q14BE0_MOUSE Mocs3 protein OS=Mus musculus GN=Mocs3 PE=2 SV=1	2	2	2	2	3.5	49.374		108340000	12485000	17988000	26552000	9451500	10801000	9996900	0	11274000	9795600
A2BE28	sp|A2BE28|LAS1L_MOUSE Ribosomal biogenesis protein LAS1L OS=Mus musculus GN=Las1l PE=1 SV=1	1	1	1	1	1.8	89.413		0	0	0	0	0	0	0	0	0	0
A2BE93;Q5U445;Q3T9S3;Q9EQU5;A2BE92;Q9CRT3	tr|A2BE93|A2BE93_MOUSE Protein SET (Fragment) OS=Mus musculus GN=Set PE=1 SV=1;tr|Q5U445|Q5U445_MOUSE cDNA sequence BC085271 OS=Mus musculus GN=BC085271 PE=2 SV=1;tr|Q3T9S3|Q3T9S3_MOUSE SET translocation OS=Mus musculus GN=Set PE=2 SV=1;sp|Q9EQU5|SET_MOUSE	6	6	6	6	34.9	24.923		473570000	46640000	46388000	40479000	40004000	50881000	66707000	45742000	63416000	73317000
Q3UDA2;A2BFF8;A2BFF7;D6Q0F7;Q3TPJ8;A2BFF5;A2BFF9;D6Q0F6;D6Q0F5;O88487	tr|Q3UDA2|Q3UDA2_MOUSE Uncharacterized protein (Fragment) OS=Mus musculus GN=Dync1i2 PE=2 SV=1;tr|A2BFF8|A2BFF8_MOUSE Cytoplasmic dynein 1 intermediate chain 2 OS=Mus musculus GN=Dync1i2 PE=1 SV=1;tr|A2BFF7|A2BFF7_MOUSE Dynein cytoplasmic 1 intermediate ch	10	1	1	1	1.7	59.411		12525000	1743500	2308700	1908400	2387300	0	0	0	0	4177400
A2BGI8;Q4G0C5;Q3UY37;Q3UWH9;A2BGI9;Q9D868	tr|A2BGI8|A2BGI8_MOUSE Peptidyl-prolyl cis-trans isomerase (Fragment) OS=Mus musculus GN=Ppih PE=1 SV=1;tr|Q4G0C5|Q4G0C5_MOUSE Peptidyl-prolyl cis-trans isomerase OS=Mus musculus GN=Ppih PE=1 SV=1;tr|Q3UY37|Q3UY37_MOUSE Peptidyl-prolyl cis-trans isomerase	6	2	2	2	14.6	17.233		18252000	2826000	0	2465700	2142100	2285200	2745800	1659200	2136500	1991000
A2CF88;P39654	tr|A2CF88|A2CF88_MOUSE Arachidonate 15-lipoxygenase OS=Mus musculus GN=Alox15 PE=1 SV=1;sp|P39654|LOX15_MOUSE Arachidonate 15-lipoxygenase OS=Mus musculus GN=Alox15 PE=1 SV=4	2	13	13	13	28.8	75.444		82555000	11103000	2129900	4571000	3580800	3125000	5006900	18653000	13683000	20703000
A2NTJ9;A4QPF0;O55002;Q3ZB55;Q3ZB54;A2NTK4;A2NTK1;A2NTK2;O70434;E9Q1Z6	tr|A2NTJ9|A2NTJ9_MOUSE PIRA2 (Fragment) OS=Mus musculus GN=Pira2 PE=2 SV=1;tr|A4QPF0|A4QPF0_MOUSE Pira11 protein OS=Mus musculus GN=Pira11 PE=2 SV=1;tr|O55002|O55002_MOUSE Killer cell inhibitory receptor-like protein p91C (Fragment) OS=Mus musculus GN=Pira	10	4	4	1	8.4	75.237		11191000	1359000	2053100	540870	0	141570	0	2843500	2109100	2144200
A2RRJ4;Q924C1	tr|A2RRJ4|A2RRJ4_MOUSE Exportin 5 OS=Mus musculus GN=Xpo5 PE=2 SV=1;sp|Q924C1|XPO5_MOUSE Exportin-5 OS=Mus musculus GN=Xpo5 PE=1 SV=1	2	3	3	3	2.8	136.93		3765700	217460	439580	520500	540290	296490	698690	229160	439200	384300
F6ZBL2;A2RRJ6;Q80SY4	tr|F6ZBL2|F6ZBL2_MOUSE E3 ubiquitin-protein ligase MIB1 (Fragment) OS=Mus musculus GN=Mib1 PE=1 SV=1;tr|A2RRJ6|A2RRJ6_MOUSE Mib1 protein OS=Mus musculus GN=Mib1 PE=2 SV=1;sp|Q80SY4|MIB1_MOUSE E3 ubiquitin-protein ligase MIB1 OS=Mus musculus GN=Mib1 PE=1 SV	3	1	1	1	1.7	69.637		32479000	540960	0	0	8789400	7682700	9343200	4580300	1018100	524160
A2RRK3;O54988	tr|A2RRK3|A2RRK3_MOUSE Slk protein OS=Mus musculus GN=Slk PE=2 SV=1;sp|O54988|SLK_MOUSE STE20-like serine/threonine-protein kinase OS=Mus musculus GN=Slk PE=1 SV=2	2	9	7	7	8.3	137.71		14846000	1329700	1912900	448600	1834000	1525600	2258600	868640	3289500	1378500
A2RRR3;E9Q8N5;Q08EB6;Q08EB5;F7DCH5;B9EJA4;Q8BRT1	tr|A2RRR3|A2RRR3_MOUSE Clasp2 protein OS=Mus musculus GN=Clasp2 PE=2 SV=1;tr|E9Q8N5|E9Q8N5_MOUSE CLIP-associating protein 2 OS=Mus musculus GN=Clasp2 PE=1 SV=1;tr|Q08EB6|Q08EB6_MOUSE CLIP-associating protein 2 OS=Mus musculus GN=Clasp2 PE=1 SV=1;tr|Q08EB5|	7	3	3	1	3.7	119.47		2457100	0	0	0	264340	363260	410240	544300	450580	424420
A2RS22;Q9WUM3;D3YUG6	tr|A2RS22|A2RS22_MOUSE Coronin OS=Mus musculus GN=Coro1b PE=1 SV=1;sp|Q9WUM3|COR1B_MOUSE Coronin-1B OS=Mus musculus GN=Coro1b PE=1 SV=1	3	8	8	8	18.8	53.912		226490000	30858000	16276000	16374000	24544000	22920000	34712000	25824000	30120000	24857000
A2RS23;Q11136	tr|A2RS23|A2RS23_MOUSE Peptidase D OS=Mus musculus GN=Pepd PE=1 SV=1;sp|Q11136|PEPD_MOUSE Xaa-Pro dipeptidase OS=Mus musculus GN=Pepd PE=1 SV=3	2	1	1	1	3.2	55.028		1631300	0	591190	1040200	0	0	0	0	0	0
Q3THL1;Q8BPI2;Q3U9H7;Q8C1Z9;F6V6T4;A2RS53;Q9R0Q3	tr|Q3THL1|Q3THL1_MOUSE Uncharacterized protein OS=Mus musculus PE=2 SV=1;tr|Q8BPI2|Q8BPI2_MOUSE Transmembrane emp24 domain-containing protein 2 (Fragment) OS=Mus musculus GN=Tmed2 PE=1 SV=1;tr|Q3U9H7|Q3U9H7_MOUSE Uncharacterized protein (Fragment) OS=Mus m	7	3	3	3	32.7	12.18		111610000	13254000	1012400	1176100	15932000	9278400	27399000	5967100	17626000	19962000
A2RS58;P47941;Q8R5B8	tr|A2RS58|A2RS58_MOUSE V-crk sarcoma virus CT10 oncogene homolog (Avian)-like OS=Mus musculus GN=Crkl PE=1 SV=1;sp|P47941|CRKL_MOUSE Crk-like protein OS=Mus musculus GN=Crkl PE=1 SV=2	3	6	6	6	27.1	33.83		38488000	789120	4803100	7850000	2576000	1863400	8739100	1527700	6388200	3951600
A2RS68;Q62376;Q9CR32;Q6ZWP0;A0A1B0GRR8;A0A1B0GR69;Q7TT81;A0A1B0GRV8;A0A1B0GR44;A0A1B0GSX5;A0A1B0GR50;Q99LY5	tr|A2RS68|A2RS68_MOUSE Small nuclear ribonucleoprotein 70 (U1) OS=Mus musculus GN=Snrnp70 PE=2 SV=1;sp|Q62376|RU17_MOUSE U1 small nuclear ribonucleoprotein 70 kDa OS=Mus musculus GN=Snrnp70 PE=1 SV=2;tr|Q9CR32|Q9CR32_MOUSE Uncharacterized protein (Fragment	12	9	9	9	24.3	51.991		132150000	12914000	8459200	16273000	16693000	12894000	13778000	16710000	20724000	13706000
Q8VCE7;A2RS96;Q9CXE7	tr|Q8VCE7|Q8VCE7_MOUSE Transmembrane emp24 protein transport domain containing 5 OS=Mus musculus GN=Tmed5 PE=2 SV=1;tr|A2RS96|A2RS96_MOUSE Transmembrane emp24 protein transport domain containing 5 OS=Mus musculus GN=Tmed5 PE=1 SV=1;sp|Q9CXE7|TMED5_MOUSE Tr	3	1	1	1	5.2	26.186		16924000	1702800	0	0	1709400	2193100	2412400	3492500	2203900	3210000
A2RSB1;B7ZNL2;Q8C1W9;Q78ZA7;A0A140LJB5;A0A140LJ37;A0A140LI78	tr|A2RSB1|A2RSB1_MOUSE Nucleosome assembly protein 1-like 4 OS=Mus musculus GN=Nap1l4 PE=1 SV=1;tr|B7ZNL2|B7ZNL2_MOUSE Nap1l4 protein OS=Mus musculus GN=Nap1l4 PE=1 SV=1;tr|Q8C1W9|Q8C1W9_MOUSE Uncharacterized protein OS=Mus musculus GN=Nap1l4 PE=2 SV=1;sp|	7	7	7	6	26.7	42.679		215900000	13894000	11743000	12151000	25713000	24679000	29777000	27553000	30255000	40135000
A2RSV8;P19783;M0QWX7;D6RG40	tr|A2RSV8|A2RSV8_MOUSE Cytochrome c oxidase subunit IV isoform 1 OS=Mus musculus GN=Cox4i1 PE=1 SV=1;sp|P19783|COX41_MOUSE Cytochrome c oxidase subunit 4 isoform 1, mitochondrial OS=Mus musculus GN=Cox4i1 PE=1 SV=2	4	7	7	7	45.6	19.53		369470000	35198000	35000000	29204000	46214000	41761000	64104000	19216000	37428000	61343000
Q8CDQ3;A2RSX4	tr|Q8CDQ3|Q8CDQ3_MOUSE Protein STPG3 OS=Mus musculus GN=Stpg3 PE=2 SV=1;sp|A2RSX4|STPG3_MOUSE Protein STPG3 OS=Mus musculus GN=Stpg3 PE=2 SV=1	2	1	1	1	3.6	28.338		1509500000	101280000	140890000	116330000	165770000	204870000	192070000	191760000	229240000	167340000
A2RTT4;P61089;A0A1W2P7Z3	tr|A2RTT4|A2RTT4_MOUSE MCG4297 OS=Mus musculus GN=Ube2n PE=1 SV=1;sp|P61089|UBE2N_MOUSE Ubiquitin-conjugating enzyme E2 N OS=Mus musculus GN=Ube2n PE=1 SV=1	3	5	5	4	33.6	17.138		536640000	74626000	82202000	78480000	56997000	54702000	67333000	40479000	33659000	48162000
E9PYI3;A3KGF7;Q3V3V2;Q9Z2T4	tr|E9PYI3|E9PYI3_MOUSE Phosphoinositide phospholipase C OS=Mus musculus GN=Plcb2 PE=1 SV=1;sp|A3KGF7|PLCB2_MOUSE 1-phosphatidylinositol 4,5-bisphosphate phosphodiesterase beta-2 OS=Mus musculus GN=Plcb2 PE=1 SV=1;tr|Q3V3V2|Q3V3V2_MOUSE Phosphoinositide pho	4	4	4	1	4.2	131.83		4062800	586820	0	0	635790	248300	573380	966620	102770	949160
Q5BL14;Q58E57;J3QM43;A3KGL9;B7ZCQ3;F6W687;P09602;Q5XK38;E9Q2Z4	tr|Q5BL14|Q5BL14_MOUSE High mobility group nucleosomal binding domain 2 OS=Mus musculus GN=Hmgn2 PE=1 SV=1;tr|Q58E57|Q58E57_MOUSE High mobility group nucleosomal binding domain 2 OS=Mus musculus GN=Hmgn2 PE=2 SV=1;tr|J3QM43|J3QM43_MOUSE Predicted pseudogen	9	4	4	4	23.3	9.4226		37164000000	4032200000	5000200000	2486300000	4892200000	2507600000	4400800000	4134800000	5043400000	4666100000
A3KGR9;Q9D8V0;Q861Q5;Q6PGJ8;Q8HWB1	tr|A3KGR9|A3KGR9_MOUSE Histocompatibility 13 (Fragment) OS=Mus musculus GN=H13 PE=1 SV=1;sp|Q9D8V0|HM13_MOUSE Minor histocompatibility antigen H13 OS=Mus musculus GN=Hm13 PE=1 SV=1;tr|Q861Q5|Q861Q5_MOUSE H13 protein (Fragment) OS=Mus musculus GN=H13 PE=2 S	5	4	4	4	11	38.174		48520000	4269400	5632000	4499700	6119500	3828000	8701800	5731300	4129500	5608300
A3KMJ8;P61759	tr|A3KMJ8|A3KMJ8_MOUSE Vbp1 protein (Fragment) OS=Mus musculus GN=Vbp1 PE=2 SV=1;sp|P61759|PFD3_MOUSE Prefoldin subunit 3 OS=Mus musculus GN=Vbp1 PE=1 SV=2	2	1	1	1	6.3	21.963		2364800	0	0	2364800	0	0	0	0	0	0
A3KML3;F6YY69;F6VW30;P68254	tr|A3KML3|A3KML3_MOUSE MCG126220 OS=Mus musculus GN=Ywhaq PE=2 SV=1;tr|F6YY69|F6YY69_MOUSE 14-3-3 protein theta (Fragment) OS=Mus musculus GN=Ywhaq PE=1 SV=1;tr|F6VW30|F6VW30_MOUSE 14-3-3 protein theta (Fragment) OS=Mus musculus GN=Ywhaq PE=1 SV=1;sp|P6825	4	13	9	9	50.6	27.778		470630000	39791000	41602000	29649000	49847000	55423000	69149000	57500000	64272000	63400000
D3Z3B2;E9Q9C5;Q8C1D9;Q3UK60;A3KML5;Q80YP7;P63082	tr|D3Z3B2|D3Z3B2_MOUSE V-type proton ATPase proteolipid subunit (Fragment) OS=Mus musculus GN=Atp6v0c PE=1 SV=1;tr|E9Q9C5|E9Q9C5_MOUSE V-type proton ATPase proteolipid subunit (Fragment) OS=Mus musculus GN=Atp6v0c PE=1 SV=1;tr|Q8C1D9|Q8C1D9_MOUSE V-type pr	7	1	1	1	15.5	11.896		90261000	3159900	0	0	6967800	5350700	14616000	21202000	6207700	32757000
Q7M6W1;A3QM89;Q4FZ95;Q4FJL2;Q8K0T0	tr|Q7M6W1|Q7M6W1_MOUSE Reticulon OS=Mus musculus GN=Rtn1 PE=1 SV=1;tr|A3QM89|A3QM89_MOUSE Reticulon (Fragment) OS=Mus musculus GN=Rtn1 PE=1 SV=1;tr|Q4FZ95|Q4FZ95_MOUSE Reticulon OS=Mus musculus GN=Rtn1 PE=2 SV=1;tr|Q4FJL2|Q4FJL2_MOUSE Reticulon OS=Mus musc	5	1	1	1	3.8	23.557		168620000	11936000	29741000	26281000	16388000	17882000	15130000	13492000	15306000	22459000
A4FUS1;Q641N3;Q5CZY9;P14131	tr|A4FUS1|A4FUS1_MOUSE MCG123443 OS=Mus musculus GN=Rps16 PE=1 SV=1;tr|Q641N3|Q641N3_MOUSE Rps16 protein (Fragment) OS=Mus musculus GN=Rps16 PE=2 SV=1;tr|Q5CZY9|Q5CZY9_MOUSE Rps16 protein OS=Mus musculus GN=Rps16 PE=2 SV=1;sp|P14131|RS16_MOUSE 40S ribosoma	4	11	11	11	63	16.445		609550000	57874000	37911000	42263000	58073000	80210000	77091000	91797000	70599000	93736000
A4FUU9;Q9DBC0;B9EJ24	tr|A4FUU9|A4FUU9_MOUSE 1300018J18Rik protein (Fragment) OS=Mus musculus GN=Selenoo PE=2 SV=1;sp|Q9DBC0|SELO_MOUSE Selenoprotein O OS=Mus musculus GN=Selenoo PE=1 SV=4;tr|B9EJ24|B9EJ24_MOUSE Uncharacterized protein OS=Mus musculus GN=Selenoo PE=2 SV=1	3	2	2	2	6.2	57.19		724430	0	0	0	331680	0	392740	0	0	0
A5GZX3;Q9CPU0	tr|A5GZX3|A5GZX3_MOUSE Lactoylglutathione lyase OS=Mus musculus GN=Glo1 PE=1 SV=1;sp|Q9CPU0|LGUL_MOUSE Lactoylglutathione lyase OS=Mus musculus GN=Glo1 PE=1 SV=3	2	3	3	3	18.5	20.809		41321000	3746000	1870300	1900800	4911500	4768800	6569200	6029300	3700700	7824400
A6H659;Q3U1F9	tr|A6H659|A6H659_MOUSE Pag1 protein OS=Mus musculus GN=Pag1 PE=1 SV=1;sp|Q3U1F9|PHAG1_MOUSE Phosphoprotein associated with glycosphingolipid-enriched microdomains 1 OS=Mus musculus GN=Pag1 PE=1 SV=2	2	2	2	2	7.5	46.549		10238000	1837600	1191600	1121800	1086000	1510900	1633200	0	0	1856900
A6H6H4;Q6ZWY8;A0A0N4SVF0	tr|A6H6H4|A6H6H4_MOUSE MCG125727 OS=Mus musculus GN=Tmsb10 PE=1 SV=1;sp|Q6ZWY8|TYB10_MOUSE Thymosin beta-10 OS=Mus musculus GN=Tmsb10 PE=1 SV=3;tr|A0A0N4SVF0|A0A0N4SVF0_MOUSE Thymosin beta-10 OS=Mus musculus GN=Tmsb10 PE=1 SV=1	3	2	1	1	47.7	5.0256		1031000000	130660000	177750000	234760000	51193000	57228000	112510000	74574000	97000000	95276000
A6PW28;Q80U16;Q6PAN3;Q9D9C2	tr|A6PW28|A6PW28_MOUSE Likely orthologue of H. sapiens chromosome 6 open reading frame 32 (C6orf32) OS=Mus musculus GN=Ripor2 PE=1 SV=1;sp|Q80U16|RIPR2_MOUSE Rho family-interacting cell polarization regulator 2 OS=Mus musculus GN=Ripor2 PE=1 SV=2;tr|Q6PAN3	4	4	4	4	5.2	116.34		5780600	667550	518510	42624	184780	542320	545400	1188600	1243300	847600
A6X919	sp|A6X919|D19L1_MOUSE Probable C-mannosyltransferase DPY19L1 OS=Mus musculus GN=Dpy19l1 PE=1 SV=1	1	1	1	1	1.6	84.186		173170	0	77503	95671	0	0	0	0	0	0
A7ISP9;F8WJ93;Q3UMY5;A0A0R4J0H0;A0A0R4J1G7;Q3TGL8	tr|A7ISP9|A7ISP9_MOUSE EMAP-like protein 4 OS=Mus musculus GN=Eml4 PE=2 SV=1;tr|F8WJ93|F8WJ93_MOUSE Echinoderm microtubule-associated protein-like 4 OS=Mus musculus GN=Eml4 PE=1 SV=1;sp|Q3UMY5|EMAL4_MOUSE Echinoderm microtubule-associated protein-like 4 OS	6	4	4	4	5.3	108.71		6196200	423470	555360	738130	780720	959690	1131900	1049000	288750	269200
A7VJ98;Q80X87;Q9CQI3	tr|A7VJ98|A7VJ98_MOUSE Glia maturation factor beta OS=Mus musculus GN=Gmfb PE=2 SV=1;tr|Q80X87|Q80X87_MOUSE Glia maturation factor, beta OS=Mus musculus GN=Gmfb PE=2 SV=1;sp|Q9CQI3|GMFB_MOUSE Glia maturation factor beta OS=Mus musculus GN=Gmfb PE=1 SV=3	3	3	2	2	25.4	16.722		26936000	2821100	2408300	853870	2554700	2952500	4782400	1826200	3592100	5144700
A7VJA4;Q9ERL7;D3Z2F6;D3YY16;Q3U6A4	tr|A7VJA4|A7VJA4_MOUSE Glia maturation factor gamma OS=Mus musculus GN=Gmfg PE=1 SV=1;sp|Q9ERL7|GMFG_MOUSE Glia maturation factor gamma OS=Mus musculus GN=Gmfg PE=1 SV=1	5	7	7	6	49.3	16.748		1296200000	169460000	187110000	163150000	123320000	127060000	174950000	75934000	126460000	148780000
A7VJD3;O88855;Q3U2P2	tr|A7VJD3|A7VJD3_MOUSE LTB4 receptor OS=Mus musculus GN=Ltb4r1 PE=3 SV=1;sp|O88855|LT4R1_MOUSE Leukotriene B4 receptor 1 OS=Mus musculus GN=Ltb4r PE=2 SV=1	3	4	4	4	16.5	38.252		141860000	7653400	11542000	9300500	0	38967000	0	5202400	6211600	62988000
Q3UDG0;Q3TMT4;Q3THE7;A7VL18;Q9JLJ2;Q3V1N7;Q3U367;Q3TG52	tr|Q3UDG0|Q3UDG0_MOUSE Uncharacterized protein OS=Mus musculus GN=Aldh9a1 PE=2 SV=1;tr|Q3TMT4|Q3TMT4_MOUSE Uncharacterized protein OS=Mus musculus GN=Aldh9a1 PE=2 SV=1;tr|Q3THE7|Q3THE7_MOUSE Uncharacterized protein OS=Mus musculus GN=Aldh9a1 PE=2 SV=1;tr|A	8	8	8	8	19.4	53.48		89960000	7744000	7364400	12404000	9298600	8056900	12573000	11438000	10113000	10967000
Q7TQD5;Q3UGT1;A8ASF5;P97742	tr|Q7TQD5|Q7TQD5_MOUSE Carnitine palmitoyltransferase 1a, liver OS=Mus musculus GN=Cpt1a PE=1 SV=1;tr|Q3UGT1|Q3UGT1_MOUSE Uncharacterized protein OS=Mus musculus GN=Cpt1a PE=2 SV=1;tr|A8ASF5|A8ASF5_MOUSE Acyltransferase OS=Mus musculus GN=Cpt1a PE=2 SV=1;s	4	3	3	3	5.6	88.25		2503900	530540	0	296630	0	1253600	0	0	0	423070
A8CVP4;Q99JW4;A0A0R4J005;A8CVP1;Q4ZJB3;E9QP62;Q9D7B2;Q91XD2	tr|A8CVP4|A8CVP4_MOUSE LIM and senescent cell antigen-like-containing domain protein OS=Mus musculus GN=Lims1 PE=2 SV=1;sp|Q99JW4|LIMS1_MOUSE LIM and senescent cell antigen-like-containing domain protein 1 OS=Mus musculus GN=Lims1 PE=1 SV=3;tr|A0A0R4J005|A	8	9	9	9	34.2	37.241		175340000	14026000	12239000	18389000	12904000	23653000	27690000	16972000	27704000	21758000
D0U270;A8DUK0;P02088;D4N6R6;D0U269;A8DUP7;A8DUM2;A8DUP5;A8DUP3;D4N6V9;A8DUL5;A8DUK2;B1Q450;A8DUK7;A8DUK4;A8DUQ1;A8DUN2;A8DUL2;A8DUL0;E9Q223;A8DUP0;A8DUL7;Q61650;Q61348	tr|D0U270|D0U270_MUSMC Beta-globin OS=Mus musculus castaneus GN=Hbbt1 PE=3 SV=1;tr|A8DUK0|A8DUK0_MOUSE Beta-globin OS=Mus musculus GN=Hbbt1 PE=3 SV=1;sp|P02088|HBB1_MOUSE Hemoglobin subunit beta-1 OS=Mus musculus GN=Hbb-b1 PE=1 SV=2;tr|D4N6R6|D4N6R6_MUSMC	24	10	4	2	82.3	15.84		1159600000	247260000	66858000	110480000	50092000	39382000	94148000	157680000	101720000	291990000
A8DUV1	tr|A8DUV1|A8DUV1_MOUSE Alpha-globin OS=Mus musculus GN=Hbat1 PE=3 SV=1	1	5	1	1	51.4	15.141		4312500	0	0	0	580490	1282800	462250	0	1472300	514610
A8DUV3;P01942;Q61287;Q9CY10;Q91VB8;Q8BPF4;Q9QWJ3;Q9CY06;Q9CWS5;Q61649	tr|A8DUV3|A8DUV3_MOUSE Alpha-globin OS=Mus musculus GN=Hbat1 PE=3 SV=1;sp|P01942|HBA_MOUSE Hemoglobin subunit alpha OS=Mus musculus GN=Hba PE=1 SV=2;tr|Q61287|Q61287_MOUSE Alpha-globin OS=Mus musculus GN=Hbat1 PE=2 SV=1;tr|Q9CY10|Q9CY10_MOUSE Uncharacteriz	10	6	6	2	62	15.085		1550500000	274050000	71613000	135950000	78697000	51347000	114220000	224970000	155670000	443990000
Q54AH9;Q549D9;D0U285;A8DV41;P02089;Q9QUN8;A8DV59;D4N6N2;D4N6M2;D0U293;D0U284;D4N6N9;CON__Q3SX09;CON__P02070;P02104	tr|Q54AH9|Q54AH9_MOUSE Beta-2-globin (Fragment) OS=Mus musculus GN=Hbb-b2 PE=2 SV=1;tr|Q549D9|Q549D9_MOUSE Beta-globin OS=Mus musculus GN=Hbb-b2 PE=2 SV=1;tr|D0U285|D0U285_MUSMC Beta-globin OS=Mus musculus castaneus GN=Hbbt2 PE=3 SV=1;tr|A8DV41|A8DV41_MOUS	15	11	11	4	79.5	15.747		1552500000	343550000	98397000	132330000	68404000	37317000	110970000	245220000	139830000	376500000
A8IP69;P61982	tr|A8IP69|A8IP69_MOUSE 14-3-3 protein gamma subtype OS=Mus musculus GN=Ywhag PE=1 SV=1;sp|P61982|1433G_MOUSE 14-3-3 protein gamma OS=Mus musculus GN=Ywhag PE=1 SV=2	2	11	7	7	51.8	28.302		283690000	16216000	43034000	23763000	28091000	27775000	39967000	25860000	44293000	34695000
A8Y5G7;O35654	tr|A8Y5G7|A8Y5G7_MOUSE DNA polymerase delta subunit 2 (Fragment) OS=Mus musculus GN=Pold2 PE=1 SV=1;sp|O35654|DPOD2_MOUSE DNA polymerase delta subunit 2 OS=Mus musculus GN=Pold2 PE=1 SV=2	2	2	2	2	10	26.355		4626300	693780	1601800	2330800	0	0	0	0	0	0
B0LAE4;Q3UBA1;Q3TQE3;Q8C1Y9;Q80ZW9;Q3TIC7;Q3THR3;Q9JKW0	tr|B0LAE4|B0LAE4_MOUSE ADP-ribosylation factor-like 6 interacting protein 1 (Fragment) OS=Mus musculus GN=Arl6ip1 PE=2 SV=1;tr|Q3UBA1|Q3UBA1_MOUSE Uncharacterized protein (Fragment) OS=Mus musculus GN=Arl6ip1 PE=2 SV=1;tr|Q3TQE3|Q3TQE3_MOUSE Uncharacterize	8	1	1	1	5.8	15.907		35083000	0	12962000	0	0	0	8812100	0	8463400	4844900
H3BJY1;H3BJ78;H3BKF4;H3BIZ8;B0QZP8;O55101	tr|H3BJY1|H3BJY1_MOUSE Synaptogyrin-2 OS=Mus musculus GN=Syngr2 PE=4 SV=1;tr|H3BJ78|H3BJ78_MOUSE Synaptogyrin-2 (Fragment) OS=Mus musculus GN=Syngr2 PE=4 SV=1;tr|H3BKF4|H3BKF4_MOUSE Predicted gene 20708 OS=Mus musculus GN=Gm20708 PE=4 SV=1;tr|H3BIZ8|H3BIZ8	6	1	1	1	21.7	4.6893		413660000	28696000	43913000	54126000	41828000	42966000	52782000	55989000	43178000	50180000
B0R091;P61022	tr|B0R091|B0R091_MOUSE Calcineurin B homologous protein 1 OS=Mus musculus GN=Chp1 PE=1 SV=1;sp|P61022|CHP1_MOUSE Calcineurin B homologous protein 1 OS=Mus musculus GN=Chp1 PE=1 SV=2	2	1	1	1	6.3	21.997		16117000	2161100	843770	816190	1794600	2309800	2044500	2059500	1572800	2514800
Q3V299;B1AQD9;Q9Z2R6	tr|Q3V299|Q3V299_MOUSE Unc-119 homolog (C. elegans), isoform CRA_a OS=Mus musculus GN=Unc119 PE=1 SV=1;tr|B1AQD9|B1AQD9_MOUSE Protein unc-119 homolog A OS=Mus musculus GN=Unc119 PE=1 SV=1;sp|Q9Z2R6|U119A_MOUSE Protein unc-119 homolog A OS=Mus musculus GN=U	3	1	1	1	5.4	27.01		4660200	621960	733780	961840	0	1114400	1228200	0	0	0
B1AQR8;G3X9T7;O08573	tr|B1AQR8|B1AQR8_MOUSE Galectin OS=Mus musculus GN=Lgals9 PE=1 SV=1;tr|G3X9T7|G3X9T7_MOUSE Galectin OS=Mus musculus GN=Lgals9 PE=1 SV=1;sp|O08573|LEG9_MOUSE Galectin-9 OS=Mus musculus GN=Lgals9 PE=1 SV=1	3	3	3	3	11.1	39.907		15448000	2145000	3488700	2761700	419710	738090	763160	821750	3455000	855260
Q3UJR6;B1AR28;P50544	tr|Q3UJR6|Q3UJR6_MOUSE Uncharacterized protein (Fragment) OS=Mus musculus GN=Acadvl PE=2 SV=1;tr|B1AR28|B1AR28_MOUSE Very long-chain-specific acyl-CoA dehydrogenase, mitochondrial OS=Mus musculus GN=Acadvl PE=1 SV=1;sp|P50544|ACADV_MOUSE Very long-chain sp	3	4	4	4	11.3	55.354		6126700	391280	384680	415940	1023200	352930	482690	483300	1235600	1357100
B1ARA3;Q4FZH2;P61255;B1ARA5;Q3U7N1	tr|B1ARA3|B1ARA3_MOUSE 60S ribosomal protein L26 (Fragment) OS=Mus musculus GN=Rpl26 PE=1 SV=1;tr|Q4FZH2|Q4FZH2_MOUSE MCG50660, isoform CRA_a OS=Mus musculus GN=Rpl26 PE=1 SV=1;sp|P61255|RL26_MOUSE 60S ribosomal protein L26 OS=Mus musculus GN=Rpl26 PE=1 SV	5	5	5	5	47.6	12.217		735980000	44206000	42914000	42578000	104380000	134450000	113140000	74414000	105390000	74501000
B1ARC5;B1ARC2;Q8BWY7	tr|B1ARC5|B1ARC5_MOUSE Zinc transporter ZIP11 (Fragment) OS=Mus musculus GN=Slc39a11 PE=1 SV=8;tr|B1ARC2|B1ARC2_MOUSE Zinc transporter ZIP11 (Fragment) OS=Mus musculus GN=Slc39a11 PE=1 SV=1;sp|Q8BWY7|S39AB_MOUSE Zinc transporter ZIP11 OS=Mus musculus GN=Sl	3	1	1	1	10.1	15.53		80979000	3217200	0	0	11773000	10930000	13799000	13466000	12418000	15376000
Q3T9J2;E9QA68;B1ASA5;D3YX49;E9QAR4;E9QAR1;E9QAR6;E9Q1A5;Q6P3F1;Q3U1E7	tr|Q3T9J2|Q3T9J2_MOUSE Uncharacterized protein OS=Mus musculus GN=Zfp384 PE=2 SV=1;tr|E9QA68|E9QA68_MOUSE Zinc finger protein 362 (Fragment) OS=Mus musculus GN=Zfp362 PE=1 SV=1;tr|B1ASA5|B1ASA5_MOUSE Zinc finger protein 362 OS=Mus musculus GN=Zfp362 PE=1 S	10	1	1	1	9	24.663		2377900	0	0	0	697630	0	0	0	656230	1024100
B1ASW5;Q14BF8;Q5NCF2	tr|B1ASW5|B1ASW5_MOUSE Trafficking protein particle complex 1, isoform CRA_a OS=Mus musculus GN=Trappc1 PE=1 SV=1;tr|Q14BF8|Q14BF8_MOUSE Trafficking protein particle complex 1, isoform CRA_b OS=Mus musculus GN=Trappc1 PE=1 SV=1;sp|Q5NCF2|TPPC1_MOUSE Traffi	3	1	1	1	11.9	15.752		16573000	1328000	0	0	3644100	1002600	4129200	4360500	970130	1138100
B1AT83;Q8BK29;B1AT82;Q9D0M1	tr|B1AT83|B1AT83_MOUSE Phosphoribosyl pyrophosphate synthase-associated protein 1 (Fragment) OS=Mus musculus GN=Prpsap1 PE=1 SV=1;tr|Q8BK29|Q8BK29_MOUSE Uncharacterized protein OS=Mus musculus GN=Prpsap1 PE=2 SV=1;tr|B1AT82|B1AT82_MOUSE MCG6846, isoform CR	4	1	1	1	7.7	21.677		22307000	932020	1594300	14320000	1234700	0	0	981360	1380600	1864100
B1AT92;Q3U5I5;Q3U1Q4;Q60631;B1AT95	tr|B1AT92|B1AT92_MOUSE Growth factor receptor-bound protein 2 OS=Mus musculus GN=Grb2 PE=1 SV=1;tr|Q3U5I5|Q3U5I5_MOUSE Growth factor receptor bound protein 2, isoform CRA_b OS=Mus musculus GN=Grb2 PE=2 SV=1;tr|Q3U1Q4|Q3U1Q4_MOUSE Uncharacterized protein OS	5	8	8	8	41.4	23.587		316410000	34156000	18856000	17084000	41674000	38055000	56964000	34562000	43954000	31103000
Q66I45;B1ATD5;B1ATD4;R4GML8;Q8K296;M0QW74;Q8R0N4;Q80U24;Q9CVQ1;Q6PE02;Q91XS1	tr|Q66I45|Q66I45_MOUSE Mtmr3 protein OS=Mus musculus GN=Mtmr3 PE=2 SV=1;tr|B1ATD5|B1ATD5_MOUSE MCG9626, isoform CRA_b OS=Mus musculus GN=Mtmr3 PE=1 SV=1;tr|B1ATD4|B1ATD4_MOUSE Myotubularin-related protein 3 (Fragment) OS=Mus musculus GN=Mtmr3 PE=1 SV=1;tr|	11	7	7	7	7	129.61		4865300	164840	865910	444290	0	700030	411680	870770	918550	489190
Q8C5J1;Q99PH3;Q8C3C9;Q3U7B5;Q8BQ93;B1AV77;Q99PH4;B1ATI0;P47740	tr|Q8C5J1|Q8C5J1_MOUSE Aldehyde dehydrogenase OS=Mus musculus PE=2 SV=1;tr|Q99PH3|Q99PH3_MOUSE Aldehyde dehydrogenase OS=Mus musculus GN=Aldh3a2 PE=3 SV=1;tr|Q8C3C9|Q8C3C9_MOUSE Aldehyde dehydrogenase OS=Mus musculus GN=Aldh3a2 PE=2 SV=1;tr|Q3U7B5|Q3U7B5_M	9	6	6	6	18.3	47.682		58851000	7478900	2449000	2511700	5921000	4871300	9712300	7281100	7919400	10706000
B1ATP7;Q3U0M8;Q80Y81;B1ATP9	tr|B1ATP7|B1ATP7_MOUSE Zinc phosphodiesterase ELAC protein 2 OS=Mus musculus GN=Elac2 PE=1 SV=1;tr|Q3U0M8|Q3U0M8_MOUSE Uncharacterized protein OS=Mus musculus GN=Elac2 PE=2 SV=1;sp|Q80Y81|RNZ2_MOUSE Zinc phosphodiesterase ELAC protein 2 OS=Mus musculus GN=	4	2	2	2	4.3	91.946		1112300	218720	146030	110190	70687	126860	0	212440	227410	0
B1ATS5;Q64518;B1ATS4;Q8R0X5;E9Q559;Q8C213;Q3U1K2;Q3U6T4;Q8K3Y5;Q91YM6;Q3V1C4	tr|B1ATS5|B1ATS5_MOUSE Calcium-transporting ATPase OS=Mus musculus GN=Atp2a3 PE=1 SV=1;sp|Q64518|AT2A3_MOUSE Sarcoplasmic/endoplasmic reticulum calcium ATPase 3 OS=Mus musculus GN=Atp2a3 PE=1 SV=3;tr|B1ATS4|B1ATS4_MOUSE Calcium-transporting ATPase OS=Mus m	11	26	26	20	32.2	111.71		163670000	16486000	16170000	16241000	16400000	13225000	22505000	17656000	19029000	25952000
B1ATY9;B1ATZ0;B1ATZ1;Q3TLL4;Q3UMA3;Q99LI8	tr|B1ATY9|B1ATY9_MOUSE Hepatocyte growth factor-regulated tyrosine kinase substrate (Fragment) OS=Mus musculus GN=Hgs PE=1 SV=1;tr|B1ATZ0|B1ATZ0_MOUSE Hepatocyte growth factor-regulated tyrosine kinase substrate OS=Mus musculus GN=Hgs PE=1 SV=1;tr|B1ATZ1|B	6	3	3	3	12.7	27.917		14693000	1090100	2469000	2173200	2249500	1157900	3287200	1117800	0	1147800
B1AU25;Q9Z0X1;Q1L6K5;Q2QKE3	tr|B1AU25|B1AU25_MOUSE Apoptosis-inducing factor 1, mitochondrial OS=Mus musculus GN=Aifm1 PE=1 SV=1;sp|Q9Z0X1|AIFM1_MOUSE Apoptosis-inducing factor 1, mitochondrial OS=Mus musculus GN=Aifm1 PE=1 SV=1;tr|Q1L6K5|Q1L6K5_MOUSE Apoptosis-inducing factor short	4	7	7	7	13.5	66.113		21151000	2309500	1387500	3301900	2020900	889770	2728300	1244000	1912100	5357200
B1AU71;Q5SS00	tr|B1AU71|B1AU71_MOUSE DBF4-type zinc finger-containing protein 2 homolog (Fragment) OS=Mus musculus GN=Zdbf2 PE=1 SV=1;sp|Q5SS00|ZDBF2_MOUSE DBF4-type zinc finger-containing protein 2 homolog OS=Mus musculus GN=Zdbf2 PE=2 SV=1	2	1	1	1	14	6.0327		1937100000	148930000	32073000	42497000	232540000	283010000	242860000	369230000	277250000	308660000
B1AU76;B1AU75;Q99MD9;Q3TTH5	tr|B1AU76|B1AU76_MOUSE Nuclear autoantigenic sperm protein OS=Mus musculus GN=Nasp PE=1 SV=1;tr|B1AU75|B1AU75_MOUSE Nuclear autoantigenic sperm protein OS=Mus musculus GN=Nasp PE=1 SV=1;sp|Q99MD9|NASP_MOUSE Nuclear autoantigenic sperm protein OS=Mus muscul	4	7	7	7	19.6	48.765		50058000	5755400	1910300	1788500	5008900	8299300	6119400	6711500	8479700	5985200
Q8BNW5;B1AUL5;B1AUL6;P97504	tr|Q8BNW5|Q8BNW5_MOUSE Uncharacterized protein (Fragment) OS=Mus musculus GN=Bmx PE=2 SV=1;tr|B1AUL5|B1AUL5_MOUSE Tyrosine-protein kinase OS=Mus musculus GN=Bmx PE=2 SV=1;tr|B1AUL6|B1AUL6_MOUSE Tyrosine-protein kinase OS=Mus musculus GN=Bmx PE=1 SV=1;sp|P9	4	2	2	2	6.9	33.563		11904000	1266000	5607000	2360200	207470	1605000	244430	200720	196270	217090
B1AUX2;Q61191;Q3USQ6;F6SJS2;Q8BUC0;F6T088;A0AUN4;G5E837	tr|B1AUX2|B1AUX2_MOUSE Host cell factor 1 OS=Mus musculus GN=Hcfc1 PE=1 SV=1;sp|Q61191|HCFC1_MOUSE Host cell factor 1 OS=Mus musculus GN=Hcfc1 PE=1 SV=2	8	18	18	18	11.6	215.05		48439000	7078800	3940500	7825000	3935100	3829400	6067300	6693800	3575200	5493800
Q3TE27;B1AUX5;Q32MS4;B1AUY2;Q8VHL8;Q80Z68;B1AUY3;Q6ZQI7;Q8BM00;E9PYS6;F6SL55;E9Q4R3;Q8BYX6;F6YWG4;Q32MS3;D6RFT8	tr|Q3TE27|Q3TE27_MOUSE Rho GTPase-activating protein 4 OS=Mus musculus GN=Arhgap4 PE=1 SV=1;tr|B1AUX5|B1AUX5_MOUSE Rho GTPase activating protein 4, isoform CRA_b OS=Mus musculus GN=Arhgap4 PE=1 SV=1;tr|Q32MS4|Q32MS4_MOUSE Arhgap4 protein OS=Mus musculus GN	16	13	13	13	22.8	85.352		46715000	4829600	1082200	5948200	5011000	4488400	5564500	6536600	6831300	6423500
Q3U4G8;B1AVH4;B1AVH5;Q8C0P5;Q6NVB7;Q8R0L6;Q3U8R5;Q8BLN0	tr|Q3U4G8|Q3U4G8_MOUSE Coronin OS=Mus musculus GN=Coro2a PE=2 SV=1;tr|B1AVH4|B1AVH4_MOUSE Coronin OS=Mus musculus GN=Coro2a PE=2 SV=1;tr|B1AVH5|B1AVH5_MOUSE Coronin OS=Mus musculus GN=Coro2a PE=1 SV=1;sp|Q8C0P5|COR2A_MOUSE Coronin-2A OS=Mus musculus GN=Cor	8	2	2	2	3.8	59.601		476920	0	125690	192820	0	158410	0	0	0	0
B1AWE0;Q6PFA2;Q3THU7;B1AWE1;B1AWD8;B1AWD9;O08585	tr|B1AWE0|B1AWE0_MOUSE Clathrin light chain OS=Mus musculus GN=Clta PE=1 SV=1;tr|Q6PFA2|Q6PFA2_MOUSE Clathrin light chain OS=Mus musculus GN=Clta PE=1 SV=1;tr|Q3THU7|Q3THU7_MOUSE Clathrin light chain OS=Mus musculus GN=Clta PE=2 SV=1;tr|B1AWE1|B1AWE1_MOUSE	7	7	7	7	31.9	23.478		457510000	69478000	86011000	6511900	72754000	20179000	61631000	11755000	47818000	81372000
B1AX98;E9PV22;Q505F5;F6Z4L9;F6YT33	tr|B1AX98|B1AX98_MOUSE Leucine rich repeat containing 47 OS=Mus musculus GN=Lrrc47 PE=1 SV=1;tr|E9PV22|E9PV22_MOUSE Leucine-rich repeat-containing protein 47 OS=Mus musculus GN=Lrrc47 PE=1 SV=1;sp|Q505F5|LRC47_MOUSE Leucine-rich repeat-containing protein 4	5	8	8	8	17.4	63.589		21785000	2187600	345240	1303600	2560900	2762700	1392200	3147900	4320700	3763800
E9PV45;B1AY13	tr|E9PV45|E9PV45_MOUSE Ubiquitin carboxyl-terminal hydrolase 24 OS=Mus musculus GN=Usp24 PE=1 SV=1;sp|B1AY13|UBP24_MOUSE Ubiquitin carboxyl-terminal hydrolase 24 OS=Mus musculus GN=Usp24 PE=1 SV=1	2	3	3	3	1.4	294.13		873000	121520	55621	85696	149640	96059	118360	47984	81566	116560
B1AYC9;Q8R5A3;Q3TS23;S4R2K5;F2Z4B7;G5E867;F2Z3U3	tr|B1AYC9|B1AYC9_MOUSE Amyloid beta (A4) protein-binding, family B, member 1 interacting protein OS=Mus musculus GN=Apbb1ip PE=1 SV=1;sp|Q8R5A3|AB1IP_MOUSE Amyloid beta A4 precursor protein-binding family B member 1-interacting protein OS=Mus musculus GN=A	7	9	9	9	15.2	74.318		156200000	16399000	15699000	18668000	12634000	11921000	20858000	19753000	16335000	23930000
Q3UUT9;B1AZI6;Q3US09	tr|Q3UUT9|Q3UUT9_MOUSE Uncharacterized protein OS=Mus musculus GN=Thoc2 PE=2 SV=1;sp|B1AZI6|THOC2_MOUSE THO complex subunit 2 OS=Mus musculus GN=Thoc2 PE=1 SV=1;tr|Q3US09|Q3US09_MOUSE Uncharacterized protein (Fragment) OS=Mus musculus GN=Thoc2 PE=2 SV=1	3	2	2	2	7	46.462		5946000	1173300	0	1376500	765440	0	934420	494190	0	1202200
B1AZS9;O08807	tr|B1AZS9|B1AZS9_MOUSE Peroxiredoxin-4 (Fragment) OS=Mus musculus GN=Prdx4 PE=1 SV=1;sp|O08807|PRDX4_MOUSE Peroxiredoxin-4 OS=Mus musculus GN=Prdx4 PE=1 SV=1	2	2	1	1	8.3	26.391		233640000	28871000	25412000	34272000	23377000	0	31564000	31449000	25952000	32747000
B1B1A8;Q6PDN3	tr|B1B1A8|B1B1A8_MOUSE Myosin light chain kinase, smooth muscle OS=Mus musculus GN=Mylk PE=1 SV=1;sp|Q6PDN3|MYLK_MOUSE Myosin light chain kinase, smooth muscle OS=Mus musculus GN=Mylk PE=1 SV=3	2	1	1	1	0.4	213.61		2019500	128810	0	0	238060	338840	371020	292830	279690	370250
Q9JIA0;B2C3G8;P42230;Q6PHA0;Q71UV3;A2A5D3;A2A5D4	tr|Q9JIA0|Q9JIA0_MOUSE Signal transducer and activator of transcription OS=Mus musculus GN=Stat5a PE=1 SV=2;tr|B2C3G8|B2C3G8_MOUSE Signal transducer and activator of transcription OS=Mus musculus GN=Stat5a PE=1 SV=1;sp|P42230|STA5A_MOUSE Signal transducer	7	5	2	2	8.4	90.83		525790	366150	0	0	0	40314	45567	0	41761	31995
B2CY77;P14206;A0A1L1SRW0;A0A1L1SUK3	tr|B2CY77|B2CY77_MOUSE Laminin receptor (Fragment) OS=Mus musculus GN=Rpsa PE=2 SV=1;sp|P14206|RSSA_MOUSE 40S ribosomal protein SA OS=Mus musculus GN=Rpsa PE=1 SV=4;tr|A0A1L1SRW0|A0A1L1SRW0_MOUSE 40S ribosomal protein SA (Fragment) OS=Mus musculus GN=Rpsa	4	9	9	9	39.7	32.85		1034200000	81588000	112160000	133800000	95057000	114880000	134190000	115360000	119680000	127490000
Q3UDM8;B2KGF0;Q8VEE0;M0QWJ2;A0A087WQM3;M0QWQ0;Q91VZ4;Q62505	tr|Q3UDM8|Q3UDM8_MOUSE Ribulose-phosphate 3-epimerase OS=Mus musculus GN=Rpe PE=2 SV=1;tr|B2KGF0|B2KGF0_MOUSE Ribulose-phosphate 3-epimerase OS=Mus musculus GN=Rpe PE=1 SV=1;sp|Q8VEE0|RPE_MOUSE Ribulose-phosphate 3-epimerase OS=Mus musculus GN=Rpe PE=1 SV=	8	3	3	3	15.8	24.961		117490000	6878400	3787700	4400600	14044000	12859000	26033000	17211000	13441000	18839000
Q91V47;Q3UK94;B2M0S0;B2M0R9;Q684Q9;P21126	tr|Q91V47|Q91V47_MOUSE Housekeeping protein DXS254E (Fragment) OS=Mus musculus GN=DXS254E PE=4 SV=1;tr|Q3UK94|Q3UK94_MOUSE Ubiquitin-like 4 OS=Mus musculus GN=Ubl4 PE=1 SV=1;tr|B2M0S0|B2M0S0_MOUSE TU11 isoform B OS=Mus musculus GN=Tu11 PE=2 SV=1;tr|B2M0R9|	6	1	1	1	9.9	17.228		13541000	0	0	0	1937000	1799600	2478000	2606200	1872600	2848200
Q3TDM8;E9Q855;Q3UK26;Q3UXS0;B2M0S2;O35609;B2M0S3	tr|Q3TDM8|Q3TDM8_MOUSE Secretory carrier-associated membrane protein OS=Mus musculus GN=Scamp3 PE=2 SV=1;tr|E9Q855|E9Q855_MOUSE Secretory carrier-associated membrane protein OS=Mus musculus GN=Scamp3 PE=1 SV=1;tr|Q3UK26|Q3UK26_MOUSE Secretory carrier-assoc	7	3	3	3	15.6	34.576		26781000	5134100	3513700	6453600	1614700	1270500	2831000	2529700	1448500	1985400
B2M1R6;Q3U9Q3;Q3U6X2;H3BKD0;H3BKI8;H3BJS9	tr|B2M1R6|B2M1R6_MOUSE Heterogeneous nuclear ribonucleoprotein K OS=Mus musculus GN=Hnrnpk PE=1 SV=1;tr|Q3U9Q3|Q3U9Q3_MOUSE Uncharacterized protein OS=Mus musculus GN=Hnrnpk PE=2 SV=1;tr|Q3U6X2|Q3U6X2_MOUSE Uncharacterized protein OS=Mus musculus GN=Hnrnpk	6	16	16	1	41.4	48.562		997980000	77927000	63939000	60993000	120450000	116030000	165090000	127850000	137690000	128010000
B2M1R7;Q61990;Q3TF69;Q3TT81;P57722;E9Q7D8;Q8CFQ6;Q3V486;G3UYM5	tr|B2M1R7|B2M1R7_MOUSE Poly(RC) binding protein 2 OS=Mus musculus GN=Pcbp2 PE=2 SV=1;sp|Q61990|PCBP2_MOUSE Poly(rC)-binding protein 2 OS=Mus musculus GN=Pcbp2 PE=1 SV=1;tr|Q3TF69|Q3TF69_MOUSE Uncharacterized protein OS=Mus musculus GN=Pcbp2 PE=2 SV=1;tr|Q3	9	13	8	8	46.3	38.15		443590000	35763000	37062000	43612000	44212000	50120000	63417000	61462000	51912000	56034000
Q3UWP8;B2MWM9;P14211	tr|Q3UWP8|Q3UWP8_MOUSE Uncharacterized protein (Fragment) OS=Mus musculus GN=Calr PE=2 SV=1;tr|B2MWM9|B2MWM9_MOUSE Calreticulin OS=Mus musculus GN=Calr PE=1 SV=1;sp|P14211|CALR_MOUSE Calreticulin OS=Mus musculus GN=Calr PE=1 SV=1	3	19	19	19	56.2	42.195		1624200000	158390000	139330000	101070000	185000000	152060000	292730000	162080000	160810000	272750000
B2RPS1;Q0PD56;P61021;Q8C458	tr|B2RPS1|B2RPS1_MOUSE RAB5B, member RAS oncogene family OS=Mus musculus GN=Rab5b PE=1 SV=1;tr|Q0PD56|Q0PD56_MOUSE Rab5B OS=Mus musculus GN=Rab5b PE=2 SV=1;sp|P61021|RAB5B_MOUSE Ras-related protein Rab-5B OS=Mus musculus GN=Rab5b PE=1 SV=1;tr|Q8C458|Q8C458	4	5	2	2	27	23.707		92866000	9973600	13211000	6109100	9100600	6345300	14255000	11130000	13333000	9409400
D3Z5B1;Q8CEW7;B2RPU8;Q9D1L0;Q8K3S8	tr|D3Z5B1|D3Z5B1_MOUSE Zinc finger, BED type-containing 5 (Fragment) OS=Mus musculus GN=Zbed5 PE=4 SV=8;tr|Q8CEW7|Q8CEW7_MOUSE Uncharacterized protein OS=Mus musculus GN=Zbed5 PE=2 SV=1;tr|B2RPU8|B2RPU8_MOUSE MCG130675 OS=Mus musculus GN=Zbed5 PE=2 SV=1;sp	5	2	2	2	19.7	19.183		16667000	0	5310800	5824200	0	0	1607000	1328400	1145800	1451000
E9QAI5;B2RQC6;G3UWN2;E9QAT6;Q7TN13;Q6P9L1;Q80VF8;Q9CWQ9	tr|E9QAI5|E9QAI5_MOUSE CAD protein OS=Mus musculus GN=Cad PE=1 SV=1;sp|B2RQC6|PYR1_MOUSE CAD protein OS=Mus musculus GN=Cad PE=1 SV=1;tr|G3UWN2|G3UWN2_MOUSE CAD protein OS=Mus musculus GN=Cad PE=1 SV=1;tr|E9QAT6|E9QAT6_MOUSE CAD protein OS=Mus musculus GN=	8	16	16	16	9	236.25		17170000	1591200	2052000	2005600	1689000	1821700	2116900	1738000	1643000	2512500
B2RQS6;Q8VHK9	tr|B2RQS6|B2RQS6_MOUSE Dhx36 protein OS=Mus musculus GN=Dhx36 PE=2 SV=1;sp|Q8VHK9|DHX36_MOUSE ATP-dependent RNA helicase DHX36 OS=Mus musculus GN=Dhx36 PE=1 SV=2	2	1	1	1	1.4	113.84		1237100	0	0	0	127330	152990	187160	601480	168130	0
Q8BX26;B2RR29;Q8BUM3;B7ZNE1	tr|Q8BX26|Q8BX26_MOUSE Uncharacterized protein OS=Mus musculus GN=Ptpn7 PE=2 SV=1;tr|B2RR29|B2RR29_MOUSE Protein tyrosine phosphatase, non-receptor type 7 OS=Mus musculus GN=Ptpn7 PE=2 SV=1;sp|Q8BUM3|PTN7_MOUSE Tyrosine-protein phosphatase non-receptor typ	4	2	2	2	8.9	38.165		15359000	0	919530	663630	1338900	2379500	2233100	2708600	3190000	1925800
B2RRE0;Q9WTQ5	tr|B2RRE0|B2RRE0_MOUSE A kinase (PRKA) anchor protein (Gravin) 12 OS=Mus musculus GN=Akap12 PE=2 SV=1;sp|Q9WTQ5|AKA12_MOUSE A-kinase anchor protein 12 OS=Mus musculus GN=Akap12 PE=1 SV=1	2	1	1	1	1.1	180.69		498410	111680	0	0	40296	110430	0	85335	87696	62977
B2RRH9;Q3THK7	tr|B2RRH9|B2RRH9_MOUSE Guanine monphosphate synthetase OS=Mus musculus GN=Gmps PE=1 SV=1;sp|Q3THK7|GUAA_MOUSE GMP synthase [glutamine-hydrolyzing] OS=Mus musculus GN=Gmps PE=1 SV=2	2	9	9	9	17.7	76.723		23698000	2315000	2065200	2305600	3149400	2259000	3499700	1372600	2803600	3927500
Q3UAF7;Q3UAF6;Q3U5R4;B2RRX1;P60710;Q3UA89;Q3UAA9;Q3UGS0;Q3TIJ9;Q3U939;Q3U804;Q61276;E9Q1F2;Q3UCF8;Q99NC5;F8WGM8	tr|Q3UAF7|Q3UAF7_MOUSE Uncharacterized protein OS=Mus musculus GN=Actb PE=2 SV=1;tr|Q3UAF6|Q3UAF6_MOUSE Uncharacterized protein OS=Mus musculus GN=Actb PE=2 SV=1;tr|Q3U5R4|Q3U5R4_MOUSE Uncharacterized protein OS=Mus musculus GN=Actb PE=2 SV=1;tr|B2RRX1|B2R	16	21	21	0	66.7	41.75		56942000000	5808600000	5182600000	5057600000	5723200000	5399100000	7443200000	7074000000	7433100000	7820700000
B2RRX2;P63328;Q8C649;Q4V9X0;Q3UXV4;E9Q6P2;G3X8U7;E0CZ78;P48453;Q9D5R5;Q3V074;Q80XK0;P48455	tr|B2RRX2|B2RRX2_MOUSE Serine/threonine-protein phosphatase OS=Mus musculus GN=Ppp3ca PE=2 SV=1;sp|P63328|PP2BA_MOUSE Serine/threonine-protein phosphatase 2B catalytic subunit alpha isoform OS=Mus musculus GN=Ppp3ca PE=1 SV=1;tr|Q8C649|Q8C649_MOUSE Unchara	13	6	6	6	14	58.643		107730000	11128000	9866500	15019000	9681100	7353800	13883000	13769000	11843000	15184000
B2RRZ7;Q3U0V2	tr|B2RRZ7|B2RRZ7_MOUSE TNFRSF1A-associated via death domain OS=Mus musculus GN=Tradd PE=1 SV=1;sp|Q3U0V2|TRADD_MOUSE Tumor necrosis factor receptor type 1-associated DEATH domain protein OS=Mus musculus GN=Tradd PE=1 SV=1	2	3	3	3	15.2	34.577		3006700	1604600	71567	0	0	0	580400	0	750110	0
V9GWV8;Q3V335;Q3TUU1;B2RSC8;P46935;Q8BNU7;V9GXK3	tr|V9GWV8|V9GWV8_MOUSE E3 ubiquitin-protein ligase NEDD4 (Fragment) OS=Mus musculus GN=Nedd4 PE=1 SV=8;tr|Q3V335|Q3V335_MOUSE E3 ubiquitin-protein ligase NEDD4 OS=Mus musculus GN=Nedd4 PE=1 SV=1;tr|Q3TUU1|Q3TUU1_MOUSE Uncharacterized protein OS=Mus musculu	7	2	2	2	18.9	22.136		8531000	1793200	0	0	919110	1008700	1543000	0	1472700	1794200
B2RSR7;Q3ULJ0;D3Z0L6	tr|B2RSR7|B2RSR7_MOUSE Glycerol-3-phosphate dehydrogenase [NAD(+)] OS=Mus musculus GN=Gpd1l PE=2 SV=1;sp|Q3ULJ0|GPD1L_MOUSE Glycerol-3-phosphate dehydrogenase 1-like protein OS=Mus musculus GN=Gpd1l PE=1 SV=2	3	6	6	6	16.8	38.225		48667000	4419000	6341100	4665200	4825500	4110600	5539900	4941800	7474100	6350000
B2RSV4;Q921M3	tr|B2RSV4|B2RSV4_MOUSE Splicing factor 3b, subunit 3 OS=Mus musculus GN=Sf3b3 PE=2 SV=1;sp|Q921M3|SF3B3_MOUSE Splicing factor 3B subunit 3 OS=Mus musculus GN=Sf3b3 PE=1 SV=1	2	13	13	13	14.2	135.55		75901000	7269800	7027800	7424200	6544000	8203000	9793600	10265000	9132900	10240000
B2RT97;Q9WVJ2;E9Q5I9;E9Q0U1;F6ZQQ3;F6PXS6;E9PY93	tr|B2RT97|B2RT97_MOUSE Proteasome (Prosome, macropain) 26S subunit, non-ATPase, 13 OS=Mus musculus GN=Psmd13 PE=1 SV=1;sp|Q9WVJ2|PSD13_MOUSE 26S proteasome non-ATPase regulatory subunit 13 OS=Mus musculus GN=Psmd13 PE=1 SV=1;tr|E9Q5I9|E9Q5I9_MOUSE 26S prot	7	13	13	13	39.4	42.809		110370000	7134000	7241800	4409300	39837000	7497600	11432000	8168300	11265000	13381000
B2RTM0;P62806;Q61667;Q6B822	tr|B2RTM0|B2RTM0_MOUSE Histone H4 OS=Mus musculus GN=Hist2h4 PE=1 SV=1;sp|P62806|H4_MOUSE Histone H4 OS=Mus musculus GN=Hist1h4a PE=1 SV=2;tr|Q61667|Q61667_MOUSE Histone H4 (Fragment) OS=Mus musculus PE=3 SV=1	4	9	9	9	52.4	11.367		132390000000	11677000000	9093300000	9074900000	16026000000	12813000000	21653000000	14560000000	17544000000	19947000000
CON__Q3TTY5;B2RTP7;Q3TTY5;Q61764	;tr|B2RTP7|B2RTP7_MOUSE Krt2 protein OS=Mus musculus GN=Krt2 PE=2 SV=1;sp|Q3TTY5|K22E_MOUSE Keratin, type II cytoskeletal 2 epidermal OS=Mus musculus GN=Krt2 PE=1 SV=1	4	7	1	1	9.2	70.922	+	588180	588180	0	0	0	0	0	0	0	0
B2RUA5;Q7TSI3;A0A0U1RPT0;A0A0U1RNI2;Q8BNQ1	tr|B2RUA5|B2RUA5_MOUSE SAPS domain family, member 1 OS=Mus musculus GN=Ppp6r1 PE=2 SV=1;sp|Q7TSI3|PP6R1_MOUSE Serine/threonine-protein phosphatase 6 regulatory subunit 1 OS=Mus musculus GN=Ppp6r1 PE=1 SV=1	5	6	6	6	10.7	94.555		19245000	1602100	2480100	469640	1699500	1244400	3804800	1180900	2744900	4018400
B2RUC7;Q9Z1Z2	tr|B2RUC7|B2RUC7_MOUSE Serine/threonine kinase receptor associated protein OS=Mus musculus GN=Strap PE=1 SV=1;sp|Q9Z1Z2|STRAP_MOUSE Serine-threonine kinase receptor-associated protein OS=Mus musculus GN=Strap PE=1 SV=2	2	10	10	10	38.3	38.442		67845000	5900100	5389800	6243200	6194700	8498600	8627500	5901900	9760800	11328000
B2RUD1;P52875	tr|B2RUD1|B2RUD1_MOUSE Transmembrane protein 165 OS=Mus musculus GN=Tmem165 PE=2 SV=1;sp|P52875|TM165_MOUSE Transmembrane protein 165 OS=Mus musculus GN=Tmem165 PE=1 SV=2	2	3	3	3	9.3	34.806		8401300	0	799160	1747600	2534300	971560	813510	0	0	1535100
Q3TWM9;Q3UAS4;Q3UE29;E9PZ00;Q3TXJ0;Q8BFQ1;Q3U8C4;Q3U897;Q3U825;Q3TXP9;Q3TWL8;Q3TWE9;Q3TIT5;K3W4L3;B2RUD7;Q3UFE8;J3QPG5;Q61207;Q3TID4;Q3TWF9;Q3U5W2;Q3TKB2;Q3TKK3	tr|Q3TWM9|Q3TWM9_MOUSE Uncharacterized protein (Fragment) OS=Mus musculus GN=Psap PE=2 SV=1;tr|Q3UAS4|Q3UAS4_MOUSE Uncharacterized protein OS=Mus musculus GN=Psap PE=2 SV=1;tr|Q3UE29|Q3UE29_MOUSE Uncharacterized protein OS=Mus musculus GN=Psap PE=2 SV=1;tr	23	11	11	11	23.5	58.298		358410000	42090000	34529000	53159000	26588000	27275000	38422000	48483000	44927000	42935000
Q5NCJ4;Q5NCJ5;Q5NCJ0;B2RUJ6;Q5NCJ1;Q562E3;Q8BX14;Q5NCJ2;A0A1W2P734;Q3TPI6;Q3TKC6;Q8BLC8;Q8R3E5;Q5DTR1;Q3UPQ2	tr|Q5NCJ4|Q5NCJ4_MOUSE Rap guanine nucleotide exchange factor (GEF) 6 OS=Mus musculus GN=Rapgef6 PE=1 SV=1;tr|Q5NCJ5|Q5NCJ5_MOUSE Rap guanine nucleotide exchange factor (GEF) 6 OS=Mus musculus GN=Rapgef6 PE=1 SV=1;tr|Q5NCJ0|Q5NCJ0_MOUSE Rap guanine nucleot	15	2	2	2	2.8	127.09		918390	143520	0	0	69195	166300	77874	335650	0	125840
B2RUP2;A0A0R4J257;A2A858;Q80UG7	sp|B2RUP2|UN13D_MOUSE Protein unc-13 homolog D OS=Mus musculus GN=Unc13d PE=1 SV=2;tr|A0A0R4J257|A0A0R4J257_MOUSE Protein unc-13 homolog D OS=Mus musculus GN=Unc13d PE=1 SV=1	4	9	9	9	10.6	123.12		18941000	1954300	2516100	2744500	2866200	1389000	1691200	2065300	1596100	2118300
Q8CAX4;B2RUR0;O35601	tr|Q8CAX4|Q8CAX4_MOUSE FYN binding protein, isoform CRA_c OS=Mus musculus GN=Fyb PE=2 SV=1;tr|B2RUR0|B2RUR0_MOUSE FYN binding protein OS=Mus musculus GN=Fyb PE=2 SV=1;sp|O35601|FYB1_MOUSE FYN-binding protein 1 OS=Mus musculus GN=Fyb1 PE=1 SV=2	3	2	2	2	6.2	44.67		6187500	0	1882000	1937300	0	1275000	0	0	1093200	0
B2RV77;Q9D8D6	tr|B2RV77|B2RV77_MOUSE MCG130182, isoform CRA_a OS=Mus musculus GN=Gm5483 PE=1 SV=1;tr|Q9D8D6|Q9D8D6_MOUSE 2010005H15Rik protein OS=Mus musculus GN=2010005H15Rik PE=1 SV=1	2	4	4	4	54.6	10.965		422080000	60042000	23908000	61101000	48105000	54964000	64305000	40164000	39029000	30462000
B2RVD5;Q8CBB6;Q921L4;Q8CGP1;P10853;A0JLV3;Q8CGP2;Q64475;A0JNS9;Q9D2U9;Q8CGP0;P70696;Q64524;Q8VEE3;Q8C622	tr|B2RVD5|B2RVD5_MOUSE Histone H2B OS=Mus musculus GN=Hist1h2bk PE=2 SV=1;tr|Q8CBB6|Q8CBB6_MOUSE Histone H2B OS=Mus musculus GN=Hist1h2bq PE=2 SV=1;tr|Q921L4|Q921L4_MOUSE Histone H2B OS=Mus musculus GN=LOC665622 PE=2 SV=1;sp|Q8CGP1|H2B1K_MOUSE Histone H2B	15	10	1	1	65.9	13.92		904000000	194510000	124930000	142370000	117840000	60323000	2711500	90304000	171000000	0
B2RVP5;Q3THW5;P0C0S6;Q8R029;Q3TFU6;Q3UA95	tr|B2RVP5|B2RVP5_MOUSE Histone H2A OS=Mus musculus GN=H2afv PE=2 SV=1;sp|Q3THW5|H2AV_MOUSE Histone H2A.V OS=Mus musculus GN=H2afv PE=1 SV=3;sp|P0C0S6|H2AZ_MOUSE Histone H2A.Z OS=Mus musculus GN=H2afz PE=1 SV=2;tr|Q8R029|Q8R029_MOUSE Histone H2A OS=Mus musc	6	4	2	2	31.2	13.509		1263200000	150680000	148420000	84940000	154430000	111490000	221700000	129050000	65668000	196770000
Q80UJ8;B2RWI2;Q9EP89;A0A1L1SVF9	tr|Q80UJ8|Q80UJ8_MOUSE Lactb protein OS=Mus musculus GN=Lactb PE=2 SV=1;tr|B2RWI2|B2RWI2_MOUSE Lactamase, beta OS=Mus musculus GN=Lactb PE=1 SV=1;sp|Q9EP89|LACTB_MOUSE Serine beta-lactamase-like protein LACTB, mitochondrial OS=Mus musculus GN=Lactb PE=1 SV	4	2	2	2	3.8	60.634		3770400	0	360090	786620	498570	481060	0	1006900	0	637070
B7ZND7;B2RWV7;Q8BQ30;A0A087WRI9;Q3U3A9	tr|B7ZND7|B7ZND7_MOUSE 2310014H01Rik protein OS=Mus musculus GN=Ppp1r18 PE=2 SV=1;tr|B2RWV7|B2RWV7_MOUSE 2310014H01Rik protein OS=Mus musculus GN=Ppp1r18 PE=2 SV=1;sp|Q8BQ30|PPR18_MOUSE Phostensin OS=Mus musculus GN=Ppp1r18 PE=1 SV=1;tr|A0A087WRI9|A0A087WR	5	2	2	2	3	65.61		7154700	0	2179400	1724900	303710	1199100	368130	495420	390180	493800
B2RWW1;Q8C052;A0A1D5RLY6	tr|B2RWW1|B2RWW1_MOUSE Microtubule-associated protein 1S OS=Mus musculus GN=Map1s PE=2 SV=1;sp|Q8C052|MAP1S_MOUSE Microtubule-associated protein 1S OS=Mus musculus GN=Map1s PE=1 SV=2;tr|A0A1D5RLY6|A0A1D5RLY6_MOUSE Microtubule-associated protein 1S OS=Mus m	3	5	5	5	5.8	103.02		14577000	1222100	1291600	2124600	923650	2114800	1691500	1599600	1628400	1980700
B7ZWI2;B2RXM7;Q9D1J3;A0A1W2P7G2;A0A1W2P6N2	tr|B7ZWI2|B7ZWI2_MOUSE 1110005A23Rik protein OS=Mus musculus GN=1110005A23Rik PE=2 SV=1;tr|B2RXM7|B2RXM7_MOUSE MCG113697 OS=Mus musculus GN=1110005A23Rik PE=1 SV=1;sp|Q9D1J3|SARNP_MOUSE SAP domain-containing ribonucleoprotein OS=Mus musculus GN=Sarnp PE=1	5	7	7	7	38.8	23.461		362580000	40620000	51741000	55348000	29384000	30152000	38273000	40081000	37653000	39330000
B9EKR4;B2RXQ5;Q69ZK0;I7HPV9;Q3U173	tr|B9EKR4|B9EKR4_MOUSE Phosphatidylinositol-3,4, 5-trisphosphate-dependent Rac exchange factor 1 OS=Mus musculus GN=Prex1 PE=2 SV=1;tr|B2RXQ5|B2RXQ5_MOUSE Phosphatidylinositol-3,4, 5-trisphosphate-dependent Rac exchange factor 1 OS=Mus musculus GN=Prex1 PE	5	3	3	3	3	184.94		1365300	46828	0	0	236700	182860	151440	516300	153780	77359
B2RXQ8;Q8BFQ4;A0A1L1SRB6	tr|B2RXQ8|B2RXQ8_MOUSE MCG19514, isoform CRA_a OS=Mus musculus GN=Wdr82 PE=1 SV=1;sp|Q8BFQ4|WDR82_MOUSE WD repeat-containing protein 82 OS=Mus musculus GN=Wdr82 PE=1 SV=1	3	4	4	4	18.5	35.079		18155000	1419400	0	812440	2155100	3374300	2924300	1980000	1590900	3898100
B2RXR1;Q4QRL3	tr|B2RXR1|B2RXR1_MOUSE Coiled-coil domain containing 88B OS=Mus musculus GN=Ccdc88b PE=2 SV=1;sp|Q4QRL3|CC88B_MOUSE Coiled-coil domain-containing protein 88B OS=Mus musculus GN=Ccdc88b PE=1 SV=2	2	18	18	18	14.4	166.59		24130000	1816500	1411400	929990	3316200	2620000	4867400	2879100	2607000	3682500
B2RXR2;Q8VD65;B2RY05	tr|B2RXR2|B2RXR2_MOUSE Phosphatidylinositol 3 kinase, regulatory subunit, polypeptide 4, p150 OS=Mus musculus GN=Pik3r4 PE=2 SV=1;sp|Q8VD65|PI3R4_MOUSE Phosphoinositide 3-kinase regulatory subunit 4 OS=Mus musculus GN=Pik3r4 PE=1 SV=3;tr|B2RY05|B2RY05_MOUS	3	2	2	2	2.2	152.57		316580	0	138060	178530	0	0	0	0	0	0
E9QNQ2;B2RXR6;J3QK13;J3QNJ4;J3QK37;Q8BYT6	tr|E9QNQ2|E9QNQ2_MOUSE Serine/threonine-protein phosphatase 6 regulatory ankyrin repeat subunit B OS=Mus musculus GN=Ankrd44 PE=1 SV=1;sp|B2RXR6|ANR44_MOUSE Serine/threonine-protein phosphatase 6 regulatory ankyrin repeat subunit B OS=Mus musculus GN=Ankrd	6	6	6	6	7.7	109.35		17224000	2221200	1056300	914740	2063200	1741000	2689500	1706300	2171400	2660500
B2RXT5	tr|B2RXT5|B2RXT5_MOUSE Glucose-6-phosphate isomerase OS=Mus musculus GN=Gpi1 PE=2 SV=1	1	13	1	1	36.9	38.282		82393000	10420000	6701700	3143400	11171000	2990400	19556000	8415300	7141700	12855000
B2RY04;Q8BK93	sp|B2RY04|DOCK5_MOUSE Dedicator of cytokinesis protein 5 OS=Mus musculus GN=Dock5 PE=1 SV=2;tr|Q8BK93|Q8BK93_MOUSE Uncharacterized protein OS=Mus musculus GN=Dock5 PE=2 SV=1	2	2	2	2	1.1	214.43		1792100	111280	79169	109310	108390	239410	322100	370190	157390	294860
B2RY27;Q8BYC6;Q3V3K3;F6RXB5;A0A0R4J1T3	tr|B2RY27|B2RY27_MOUSE MCG125789, isoform CRA_a OS=Mus musculus GN=Taok3 PE=2 SV=1;sp|Q8BYC6|TAOK3_MOUSE Serine/threonine-protein kinase TAO3 OS=Mus musculus GN=Taok3 PE=1 SV=2;tr|Q3V3K3|Q3V3K3_MOUSE Serine/threonine-protein kinase TAO3 OS=Mus musculus GN=	5	3	3	3	3	105.36		1520900	188350	449500	527120	355880	0	0	0	0	0
B2RY56;S4R2B0;Q8BU35;S4R2J1;S4R2A4	sp|B2RY56|RBM25_MOUSE RNA-binding protein 25 OS=Mus musculus GN=Rbm25 PE=1 SV=2;tr|S4R2B0|S4R2B0_MOUSE RNA-binding protein 25 (Fragment) OS=Mus musculus GN=Rbm25 PE=1 SV=1	5	5	5	5	7.5	99.551		19798000	701240	1601700	1514300	1455500	2757900	2169600	3588900	3426100	2582200
B3V097;Q8BIQ5;A2AEK1;B3V099;A2AEK3;A2AEJ8;F6ZKC7;Q8C7E9	tr|B3V097|B3V097_MOUSE BetaCstF-64 variant 3 OS=Mus musculus GN=Cstf2 PE=2 SV=1;sp|Q8BIQ5|CSTF2_MOUSE Cleavage stimulation factor subunit 2 OS=Mus musculus GN=Cstf2 PE=1 SV=2;tr|A2AEK1|A2AEK1_MOUSE AlphaCstF-64 variant 4 OS=Mus musculus GN=Cstf2 PE=1 SV=1;	8	6	6	6	11.6	66.424		21387000	1431800	2921800	3649300	1444300	1695500	1805200	2894300	3286600	2257800
Q3TAM0;B3VQI8;Q61462;Q8C5D4	tr|Q3TAM0|Q3TAM0_MOUSE Cytochrome b-245 light chain OS=Mus musculus GN=Cyba PE=2 SV=1;tr|B3VQI8|B3VQI8_MOUSE Cytochrome b-245 light chain OS=Mus musculus GN=Cyba PE=2 SV=1;sp|Q61462|CY24A_MOUSE Cytochrome b-245 light chain OS=Mus musculus GN=Cyba PE=1 SV=3	4	5	5	5	25.5	20.824		3125600000	324410000	321750000	369050000	286230000	361180000	355570000	418240000	377700000	311490000
B5THE2;A0A0J9YVJ0;A0A0J9YVE6	tr|B5THE2|B5THE2_MOUSE Maltase-glucoamylase OS=Mus musculus GN=Mgam PE=1 SV=1;tr|A0A0J9YVJ0|A0A0J9YVJ0_MOUSE Maltase-glucoamylase (Fragment) OS=Mus musculus GN=Mgam PE=1 SV=1;tr|A0A0J9YVE6|A0A0J9YVE6_MOUSE Maltase-glucoamylase OS=Mus musculus GN=Mgam PE=1	3	7	7	7	5	208.55		3227100	184130	141210	279560	192720	402460	87332	594710	714790	630200
B6DT57;P97369;Q3TC82;A8XU21	tr|B6DT57|B6DT57_MOUSE p40phox OS=Mus musculus GN=Ncf4 PE=2 SV=1;sp|P97369|NCF4_MOUSE Neutrophil cytosol factor 4 OS=Mus musculus GN=Ncf4 PE=1 SV=2;tr|Q3TC82|Q3TC82_MOUSE Uncharacterized protein (Fragment) OS=Mus musculus GN=Ncf4 PE=2 SV=1;tr|A8XU21|A8XU21	4	16	16	16	58.1	38.734		505370000	42826000	43037000	60324000	53907000	56734000	73538000	58782000	55028000	61196000
Q4FJV4;B7STB7;P10107;Q4FK88;Q3U5N9;Q3US43;Q8R024;Q8C846	tr|Q4FJV4|Q4FJV4_MOUSE Annexin OS=Mus musculus GN=Anxa1 PE=1 SV=1;tr|B7STB7|B7STB7_MOUSE Annexin OS=Mus musculus GN=Anxa1 PE=2 SV=1;sp|P10107|ANXA1_MOUSE Annexin A1 OS=Mus musculus GN=Anxa1 PE=1 SV=2;tr|Q4FK88|Q4FK88_MOUSE Annexin OS=Mus musculus GN=Anxa1	8	29	29	28	77.2	38.734		18670000000	2111000000	1947000000	1780300000	2034800000	1794800000	2828700000	1524600000	2534400000	2114000000
B7U582;P17156;O88688;Q91ZU5	tr|B7U582|B7U582_MOUSE Heat shock protein 70-2 OS=Mus musculus PE=3 SV=1;sp|P17156|HSP72_MOUSE Heat shock-related 70 kDa protein 2 OS=Mus musculus GN=Hspa2 PE=1 SV=2	4	17	5	4	30.3	69.723		9724300	996140	496960	596060	1073400	895790	1451500	1102800	1401300	1710300
Q569Y6;B7ZBY7;E9PY39;Q9CZY3;Q4VBX4;Q9D2M8;B2KF55;A6X925;B7ZBY6	tr|Q569Y6|Q569Y6_MOUSE Ubiquitin-conjugating enzyme E2 variant 1 OS=Mus musculus GN=Ube2v1 PE=2 SV=1;tr|B7ZBY7|B7ZBY7_MOUSE Ubiquitin-conjugating enzyme E2 variant 1 OS=Mus musculus GN=Ube2v1 PE=3 SV=1;tr|E9PY39|E9PY39_MOUSE Predicted gene 20431 OS=Mus mus	9	4	4	4	29.3	16.355		144380000	16201000	15173000	14733000	17028000	19942000	11021000	20150000	11550000	18586000
Q3THI5;Q3U8Y7;Q8BUP7;B7ZCF1;Q3TKG4;O88685;Q3UD94;A2AGN7;Q3TKC2;A0A087WPH7;F6Q2E3	tr|Q3THI5|Q3THI5_MOUSE Uncharacterized protein OS=Mus musculus GN=Psmc3 PE=2 SV=1;tr|Q3U8Y7|Q3U8Y7_MOUSE Uncharacterized protein OS=Mus musculus GN=Psmc3 PE=2 SV=1;tr|Q8BUP7|Q8BUP7_MOUSE Uncharacterized protein OS=Mus musculus GN=Psmc3 PE=2 SV=1;tr|B7ZCF1|	11	9	9	9	29.7	45.236		86165000	6749500	4940600	4655800	8990900	10777000	10766000	11776000	12758000	14751000
Q9CTC4;Q8BFU4;Q78NN4;B7ZCT1;Q9CX84;F6WK59;B7ZCT0;Q8CGT5	tr|Q9CTC4|Q9CTC4_MOUSE Uncharacterized protein (Fragment) OS=Mus musculus GN=Rgs19 PE=2 SV=1;tr|Q8BFU4|Q8BFU4_MOUSE GAIP/RGS19 short isoform OS=Mus musculus GN=Rgs19 PE=1 SV=1;tr|Q78NN4|Q78NN4_MOUSE GAIP/RGS19 OS=Mus musculus GN=Rgs19 PE=1 SV=1;tr|B7ZCT1|B	8	2	2	2	26.6	9.1432		61579000	11219000	8529800	7894700	6100800	5193800	6681600	4548100	4253800	7158000
B7ZCU2;B7ZCU5;Q3UAH6;Q3TPY5;Q3TMI0;Q6AXD3;B7ZCU4;B7ZCU3;Q3TJR5;Q3TJ64;B7ZCU0;J3QNK8;Q8CBW3;Q3UBL3	tr|B7ZCU2|B7ZCU2_MOUSE Abl interactor 1 OS=Mus musculus GN=Abi1 PE=1 SV=1;tr|B7ZCU5|B7ZCU5_MOUSE Abl interactor 1 OS=Mus musculus GN=Abi1 PE=1 SV=1;tr|Q3UAH6|Q3UAH6_MOUSE Uncharacterized protein OS=Mus musculus GN=Abi1 PE=2 SV=1;tr|Q3TPY5|Q3TPY5_MOUSE Unch	14	6	6	6	21.1	43.174		38053000	4729100	1204000	2139400	3225200	5378700	6819600	3724100	4173500	6659300
D3YZA1;B7ZMS6;D3Z7T7;E9PW20;Q2VPR3;Q9CY57	tr|D3YZA1|D3YZA1_MOUSE Chromatin target of PRMT1 protein (Fragment) OS=Mus musculus GN=Chtop PE=1 SV=8;tr|B7ZMS6|B7ZMS6_MOUSE 2500003M10Rik protein OS=Mus musculus GN=Chtop PE=2 SV=1;tr|D3Z7T7|D3Z7T7_MOUSE Chromatin target of PRMT1 protein (Fragment) OS=Mu	6	3	3	3	30.1	13.447		85155000	10176000	9775300	15089000	7420000	4420000	10917000	10629000	11098000	5629500
B7ZN92;Q3TB85;Q3T9N8;E9QNL8;B7ZN91;Q3U159;H2ELL3;E9Q5M7;B7ZN90;D3Z627;P24063;Q9R200;Q9WTV4;D3YW95;Q3URE4	tr|B7ZN92|B7ZN92_MOUSE Integrin alpha L OS=Mus musculus GN=Itgal PE=2 SV=1;tr|Q3TB85|Q3TB85_MOUSE Uncharacterized protein OS=Mus musculus GN=Itgal PE=2 SV=1;tr|Q3T9N8|Q3T9N8_MOUSE Uncharacterized protein OS=Mus musculus GN=Itgal PE=2 SV=1;tr|E9QNL8|E9QNL8_	15	11	11	11	10.4	128.09		19521000	3746700	2557100	4088500	494230	977680	175270	2785100	2055600	2641300
B7ZNI1	tr|B7ZNI1|B7ZNI1_MOUSE Phosphoinositide phospholipase C OS=Mus musculus GN=Plcb2 PE=2 SV=1	1	4	1	1	4.8	131.93		1438400	148760	0	0	202350	151710	287860	0	280450	367260
B7ZP47;Q65Z40;F6YCH1;G3UXQ2	tr|B7ZP47|B7ZP47_MOUSE Wapal protein OS=Mus musculus GN=Wapl PE=1 SV=1;sp|Q65Z40|WAPL_MOUSE Wings apart-like protein homolog OS=Mus musculus GN=Wapl PE=1 SV=2;tr|F6YCH1|F6YCH1_MOUSE Wings apart-like protein homolog (Fragment) OS=Mus musculus GN=Wapl PE=1 S	4	3	3	3	3.4	133.35		1582900	0	0	118780	0	79478	832260	0	103890	448520
Q545R3;Q3TSR4;Q3TD08;B7ZWC0;Q62433;E9Q514	tr|Q545R3|Q545R3_MOUSE N-myc downstream regulated gene 1 OS=Mus musculus GN=Ndrg1 PE=1 SV=1;tr|Q3TSR4|Q3TSR4_MOUSE Uncharacterized protein OS=Mus musculus GN=Ndrg1 PE=2 SV=1;tr|Q3TD08|Q3TD08_MOUSE Uncharacterized protein OS=Mus musculus GN=Ndrg1 PE=2 SV=1;	6	2	2	2	7.6	43.008		9275300	1308200	1001900	1353300	725250	434530	1418200	1219800	0	1814100
B9EKE9;B7ZWF1;Q3TQX5;Q62167;B9EIA2;P16381;Q3U484;Q62095;Q3TUR4;Q3V086;Q61496	tr|B9EKE9|B9EKE9_MOUSE Ddx3x protein OS=Mus musculus GN=Ddx3x PE=2 SV=1;tr|B7ZWF1|B7ZWF1_MOUSE Ddx3x protein OS=Mus musculus GN=Ddx3x PE=2 SV=1;tr|Q3TQX5|Q3TQX5_MOUSE Uncharacterized protein OS=Mus musculus GN=Ddx3x PE=1 SV=1;sp|Q62167|DDX3X_MOUSE ATP-depe	11	18	17	17	29.7	73.013		140230000	10732000	12031000	8335100	17740000	20380000	22723000	14930000	12328000	21030000
B9EHD0;Q8K1T1	tr|B9EHD0|B9EHD0_MOUSE Leucine rich repeat containing 25 OS=Mus musculus GN=Lrrc25 PE=1 SV=1;sp|Q8K1T1|LRC25_MOUSE Leucine-rich repeat-containing protein 25 OS=Mus musculus GN=Lrrc25 PE=1 SV=1	2	1	1	1	5.1	32.673		928070	928070	0	0	0	0	0	0	0	0
B9EHY2;Q80W54;I7HIP5	tr|B9EHY2|B9EHY2_MOUSE Zinc metallopeptidase, STE24 homolog (S. cerevisiae) OS=Mus musculus GN=Zmpste24 PE=1 SV=1;sp|Q80W54|FACE1_MOUSE CAAX prenyl protease 1 homolog OS=Mus musculus GN=Zmpste24 PE=1 SV=2	3	7	7	7	15.6	54.734		331630000	35049000	21457000	26970000	28849000	26220000	52311000	43680000	37498000	59599000
B9EI00	tr|B9EI00|B9EI00_MOUSE Calm5 protein OS=Mus musculus GN=Calm5 PE=2 SV=1	1	1	1	1	13.1	17.62		65879000	1244100	0	0	7549600	15222000	6410000	10234000	16317000	8903500
B9EIE9;P46664;Q8C909	tr|B9EIE9|B9EIE9_MOUSE Adenylosuccinate synthetase isozyme 2 OS=Mus musculus GN=Adss PE=1 SV=1;sp|P46664|PURA2_MOUSE Adenylosuccinate synthetase isozyme 2 OS=Mus musculus GN=Adss PE=1 SV=2	3	7	6	6	18.6	50.02		72220000	7127100	7154000	8943200	7962100	5929500	11235000	5427600	11174000	7267400
B9EIU1;Q8CGC7;Q8BTR1;A0A0A6YWH3;A0A0A6YWA4;Q3TMX9;Q9CRF9;Q3UGD4	tr|B9EIU1|B9EIU1_MOUSE Glutamyl-prolyl-tRNA synthetase OS=Mus musculus GN=Eprs PE=2 SV=1;sp|Q8CGC7|SYEP_MOUSE Bifunctional glutamate/proline--tRNA ligase OS=Mus musculus GN=Eprs PE=1 SV=4	8	23	23	23	19.8	169.96		51662000	3750600	3604800	3974800	5792300	5207100	7947800	6167500	5053200	10164000
B9EIV6;Q6BCL1	tr|B9EIV6|B9EIV6_MOUSE PML-RAR alpha-regulated adaptor molecule 1 OS=Mus musculus GN=Pram1 PE=2 SV=1;sp|Q6BCL1|PRAM_MOUSE PML-RARA-regulated adapter molecule 1 OS=Mus musculus GN=Pram1 PE=1 SV=2	2	30	30	30	55.6	75.463		379130000	32852000	24841000	31059000	31331000	52655000	53023000	57508000	51190000	44675000
B9EJ54;Q6PDG0;A0A0J9YUD5;Q6ZQG1;Q6P9L5;Q6P9Y6;Q3UFI7;E9Q880;Q80VE6	tr|B9EJ54|B9EJ54_MOUSE MCG21756, isoform CRA_b OS=Mus musculus GN=Nup205 PE=1 SV=1;tr|Q6PDG0|Q6PDG0_MOUSE Nup205 protein (Fragment) OS=Mus musculus GN=Nup205 PE=2 SV=1;tr|A0A0J9YUD5|A0A0J9YUD5_MOUSE Nucleoporin 205 OS=Mus musculus GN=Nup205 PE=1 SV=1;tr|Q6	9	6	6	6	3.6	227.46		198170000	0	195670000	293500	146290	460010	666390	295760	284510	361240
Q3UMB1;B9EJ80	tr|Q3UMB1|Q3UMB1_MOUSE Uncharacterized protein OS=Mus musculus GN=Pdzd8 PE=2 SV=1;tr|B9EJ80|B9EJ80_MOUSE PDZ domain-containing 8 OS=Mus musculus GN=Pdzd8 PE=1 SV=1	2	2	2	2	1.8	127.77		764260	47889	106510	0	176860	0	103470	217120	112410	0
Q3U0J1;B9EJX8;Q9D0W5	tr|Q3U0J1|Q3U0J1_MOUSE Peptidyl-prolyl cis-trans isomerase OS=Mus musculus GN=Ppil1 PE=2 SV=1;tr|B9EJX8|B9EJX8_MOUSE Peptidyl-prolyl cis-trans isomerase OS=Mus musculus GN=Ppil1 PE=1 SV=1;sp|Q9D0W5|PPIL1_MOUSE Peptidyl-prolyl cis-trans isomerase-like 1 OS=	3	1	1	1	8.4	18.223		20176000	2660400	2504900	3129400	1716200	2068000	0	2489100	2276200	3331600
B9EKK3;Q3UQ44;Q8C9I3;Q7TMU5;Q8BV47;Q3TU73	tr|B9EKK3|B9EKK3_MOUSE IQ motif containing GTPase activating protein 2 OS=Mus musculus GN=Iqgap2 PE=2 SV=1;sp|Q3UQ44|IQGA2_MOUSE Ras GTPase-activating-like protein IQGAP2 OS=Mus musculus GN=Iqgap2 PE=1 SV=2;tr|Q8C9I3|Q8C9I3_MOUSE Uncharacterized protein (F	6	16	13	13	11.3	180.55		14559000	1140200	1447900	1876400	1159100	1571800	1508100	2074000	1568400	2213500
B9EKP5;B7FAU9;Q8BTM8;B7FAV1;Q6KAM8;Q3U7N9;F6XC15;Q4FZG4;J3JS91;I7HPX4;F6Z2C0;Q8VHX6;Q9JJ37;F7AVL7;Q3UXJ8	tr|B9EKP5|B9EKP5_MOUSE Filamin, alpha OS=Mus musculus GN=Flna PE=2 SV=1;tr|B7FAU9|B7FAU9_MOUSE Filamin, alpha OS=Mus musculus GN=Flna PE=1 SV=1;sp|Q8BTM8|FLNA_MOUSE Filamin-A OS=Mus musculus GN=Flna PE=1 SV=5;tr|B7FAV1|B7FAV1_MOUSE Filamin, alpha (Fragment	15	124	124	116	66.5	280.47		1849400000	175650000	161190000	158590000	195600000	185620000	261140000	223200000	247620000	240770000
Q5FWA0;C0HKG6;C0HKG5	tr|Q5FWA0|Q5FWA0_MOUSE Ribonuclease T2B OS=Mus musculus GN=Rnaset2b PE=1 SV=1;sp|C0HKG6|RNT2B_MOUSE Ribonuclease T2-B OS=Mus musculus GN=Rnaset2b PE=1 SV=1;sp|C0HKG5|RNT2A_MOUSE Ribonuclease T2-A OS=Mus musculus GN=Rnaset2a PE=1 SV=1	3	2	2	2	9.7	29.608		44543000	6139900	6238700	8301400	837140	1146400	1701400	9105900	1998000	9074000
Q3U7U8;C5H0E8;P62835;A0A0G2JE52;Q3V3W9;C5H0E9	tr|Q3U7U8|Q3U7U8_MOUSE Uncharacterized protein OS=Mus musculus GN=Rap1a PE=2 SV=1;tr|C5H0E8|C5H0E8_MOUSE Rap1A-retro1 OS=Mus musculus GN=Gm9392 PE=2 SV=1;sp|P62835|RAP1A_MOUSE Ras-related protein Rap-1A OS=Mus musculus GN=Rap1a PE=1 SV=1;tr|A0A0G2JE52|A0A0	6	8	2	1	46.2	20.846		56608000	3978700	552530	4172300	6113600	7545200	11622000	5006800	7316900	10300000
C7G3P2;Q61136;Q8BPG8;Q8C5G1	tr|C7G3P2|C7G3P2_MOUSE MKIAA0536 protein (Fragment) OS=Mus musculus GN=Prpf4b PE=2 SV=1;sp|Q61136|PRP4B_MOUSE Serine/threonine-protein kinase PRP4 homolog OS=Mus musculus GN=Prpf4b PE=1 SV=3;tr|Q8BPG8|Q8BPG8_MOUSE Uncharacterized protein (Fragment) OS=Mus	4	2	2	2	2.3	117.43		749760	0	0	0	66168	254010	121510	126020	82107	99944
F6WP10;C9K0Z7;O35465	tr|F6WP10|F6WP10_MOUSE Peptidyl-prolyl cis-trans isomerase FKBP8 (Fragment) OS=Mus musculus GN=Fkbp8 PE=1 SV=1;tr|C9K0Z7|C9K0Z7_MOUSE Peptidylprolyl isomerase OS=Mus musculus GN=Fkbp8 PE=2 SV=1;sp|O35465|FKBP8_MOUSE Peptidyl-prolyl cis-trans isomerase FKBP	3	1	1	1	44.4	4.0346		19586000	0	0	0	0	0	19586000	0	0	0
C9VZF2;Q6DTY7;C9VZF1;C9VZF3;Q8BX50;A2AFM9;P70266;A0A0G2JDE6;B2Z895	tr|C9VZF2|C9VZF2_MOUSE 6-phosphofructo-2-kinase/fructose-2, 6-bisphosphatase 4 splice isoform 8 OS=Mus musculus GN=Pfkfb4 PE=2 SV=1;sp|Q6DTY7|F264_MOUSE 6-phosphofructo-2-kinase/fructose-2,6-bisphosphatase 4 OS=Mus musculus GN=Pfkfb4 PE=2 SV=4;tr|C9VZF1|C9	9	10	10	8	24.8	50.246		54108000	4142300	3473000	1793900	7352300	4584700	6755900	8082700	8866000	9057300
CON__ENSEMBL:ENSBTAP00000038253		1	8	1	0	11.6	63.165	+	955640000	75541000	0	0	115650000	100720000	177290000	126560000	133540000	226330000
CON__O95678		1	6	2	2	10.9	59.504	+	11965000	765080	1524700	963700	961020	1360300	2630900	1238300	1400200	1121200
CON__P00761		1	5	5	5	31.6	24.409	+	5365200000	391670000	618290000	584430000	526610000	732750000	568550000	632480000	755510000	554890000
CON__P01966;Q78PA4;A7M7S6;P06467	;tr|Q78PA4|Q78PA4_MOUSE Globin e1 OS=Mus musculus GN=Hba-x PE=3 SV=1;tr|A7M7S6|A7M7S6_MOUSE Hemoglobin X, alpha-like embryonic chain in Hba complex (Fragment) OS=Mus musculus GN=Hba-x PE=1 SV=1;sp|P06467|HBAZ_MOUSE Hemoglobin subunit zeta OS=Mus musculus G	4	2	1	1	15.5	15.184	+	46646000	46646000	0	0	0	0	0	0	0	0
CON__P02533;CON__Q04695;CON__Q9QWL7;CON__P08779;Q9QWL7;CON__A2A4G1;B1AQ77;Q61414;Q61781;CON__P08727;CON__P19001;B1AQ78;CON__Q6IFX2;CON__P19012;Q3SYP5;CON__Q9Z2K1;Q3ZAW8;Q9EQD7;Q9EQD6;CON__Q3ZAW8;P19001;Q6IFX2;Q9Z2K1	;;;;sp|Q9QWL7|K1C17_MOUSE Keratin, type I cytoskeletal 17 OS=Mus musculus GN=Krt17 PE=1 SV=3;;tr|B1AQ77|B1AQ77_MOUSE Keratin 15, isoform CRA_a OS=Mus musculus GN=Krt15 PE=1 SV=1;sp|Q61414|K1C15_MOUSE Keratin, type I cytoskeletal 15 OS=Mus musculus GN=Krt15	23	7	4	4	14	51.621	+	8347300	275460	2982300	0	926120	1932300	615500	318590	704740	592210
CON__P02662		1	2	2	2	10.1	22.975	+	12190000	0	0	313540	0	1239500	0	7044900	0	3592400
CON__P02769		1	6	6	4	10.7	69.293	+	7967300	485180	2974800	439740	377490	546690	0	1185100	582250	1376100
CON__P04264		1	23	20	13	44.4	66.017	+	412960000	24782000	93906000	13320000	31038000	90428000	40598000	50763000	36225000	31896000
CON__P12035		1	7	1	0	8.3	64.503	+	31691000	0	0	0	0	31691000	0	0	0	0
CON__P12763		1	4	4	4	21.4	38.418	+	22003000	1671700	3085900	1658800	1992400	3458600	2702800	1186000	4764800	1482300
CON__P13645;A2A513;CON__P02535-1;P02535;CON__P08730-1;CON__Q148H6;CON__Q7Z3Y7;P08730;CON__P05784;CON__Q7Z3Z0;CON__Q7Z3Y8;CON__Q2M2I5;P05784;Q9CV17;D0V735;CON__Q92764;B2RU72;CON__A2AB72;B1ATJ5;CON__Q7Z3Y9;CON__Q99456;Q62168;Q8VCW2;Q9Z320;A6BLY7;A1L317		26	26	26	22	55.8	59.51	+	644100000	20317000	195760000	23915000	50909000	150160000	36777000	66873000	63458000	35931000
CON__P13647		1	10	5	0	15.6	62.378	+	11067000	279090	2977700	187790	1696000	3030500	1081900	412300	542470	858830
CON__P35527		1	14	13	13	29.1	62.129	+	170070000	10719000	50108000	7912000	12559000	28410000	13527000	17387000	15961000	13485000
CON__P35908;CON__Q7Z794		2	25	25	15	41.1	65.865	+	297310000	13580000	91454000	12892000	19057000	68840000	20101000	35235000	23234000	12918000
CON__Q6NT21;CON__P78385;CON__O43790;CON__Q14533;Q3TUZ8	;;;	5	9	8	2	15.2	54.195	+	34826000	4096800	5473300	0	1379300	408190	23468000	0	0	0
CON__Q14525;CON__Q497I4;Q497I4;CON__Q6IFU5;CON__Q9C075;CON__P35900	;;sp|Q497I4|KRT35_MOUSE Keratin, type I cuticular Ha5 OS=Mus musculus GN=Krt35 PE=1 SV=1	6	6	2	1	12.6	46.213	+	8086500	0	0	0	0	0	7812800	0	0	273700
CON__Q86YZ3		1	3	3	3	4.5	282.39	+	2831000	0	235930	0	315470	812320	408230	332100	572120	154830
CON__Q9NSB4;Q99M74	;sp|Q99M74|KRT82_MOUSE Keratin, type II cuticular Hb2 OS=Mus musculus GN=Krt82 PE=1 SV=2	2	3	2	1	5.5	56.682	+	5029700	0	0	0	0	0	5029700	0	0	0
CON__REFSEQ:XP_986630;Q61897;CON__A2A5Y0;Q61765;CON__O76013;CON__Q14532;CON__O76015;CON__O76014;Q6IFX3;B1AQ75;Q0VDU1;E9PV64	;sp|Q61897|KT33B_MOUSE Keratin, type I cuticular Ha3-II OS=Mus musculus GN=Krt33b PE=1 SV=2;;sp|Q61765|K1H1_MOUSE Keratin, type I cuticular Ha1 OS=Mus musculus GN=Krt31 PE=1 SV=2	12	8	7	2	17	53.728	+	65692000	2035900	0	0	8033600	9667000	22741000	11363000	0	11850000
D3Z4M2;D3YTM0;D3Z0Z2;Q924Z4	tr|D3Z4M2|D3Z4M2_MOUSE Ceramide synthase 2 (Fragment) OS=Mus musculus GN=Cers2 PE=1 SV=1;tr|D3YTM0|D3YTM0_MOUSE Ceramide synthase 2 (Fragment) OS=Mus musculus GN=Cers2 PE=1 SV=1;tr|D3Z0Z2|D3Z0Z2_MOUSE Ceramide synthase 2 (Fragment) OS=Mus musculus GN=Cers2	4	1	1	1	12.3	15.505		76869000	9185700	1980500	2821800	9168200	8227900	11758000	10973000	11828000	10926000
D6RGS2;D3YTN4;Q99JY3	tr|D6RGS2|D6RGS2_MOUSE GTPase IMAP family member 4 OS=Mus musculus GN=Gimap4 PE=1 SV=1;tr|D3YTN4|D3YTN4_MOUSE GTPase IMAP family member 4 OS=Mus musculus GN=Gimap4 PE=1 SV=1;sp|Q99JY3|GIMA4_MOUSE GTPase IMAP family member 4 OS=Mus musculus GN=Gimap4 PE=1 S	3	1	1	1	15.9	7.0769		6053600	0	6053600	0	0	0	0	0	0	0
F6VQH5;D3YTQ3;Q9Z130	tr|F6VQH5|F6VQH5_MOUSE Heterogeneous nuclear ribonucleoprotein D-like (Fragment) OS=Mus musculus GN=Hnrnpdl PE=1 SV=1;tr|D3YTQ3|D3YTQ3_MOUSE Heterogeneous nuclear ribonucleoprotein D-like OS=Mus musculus GN=Hnrnpdl PE=1 SV=1;sp|Q9Z130|HNRDL_MOUSE Heterogen	3	3	3	3	9.9	35.534		36526000	1840600	6345600	4916500	1952500	2585600	6106400	3112100	3444600	6221800
D3YTQ9;Q3UK70;P62843;Q3UXS6	tr|D3YTQ9|D3YTQ9_MOUSE 40S ribosomal protein S15 OS=Mus musculus GN=Rps15 PE=1 SV=1;tr|Q3UK70|Q3UK70_MOUSE Uncharacterized protein OS=Mus musculus GN=Rps15 PE=2 SV=1;sp|P62843|RS15_MOUSE 40S ribosomal protein S15 OS=Mus musculus GN=Rps15 PE=1 SV=2;tr|Q3UXS	4	5	5	5	38.1	13.742		1207600000	96250000	102900000	128240000	116380000	71261000	199650000	107920000	147390000	237660000
D3YWT0;D3Z569;D3YTS1;Q9R0P6;Q6PET3	tr|D3YWT0|D3YWT0_MOUSE Signal peptidase complex catalytic subunit SEC11 OS=Mus musculus GN=Sec11a PE=1 SV=1;tr|D3Z569|D3Z569_MOUSE Signal peptidase complex catalytic subunit SEC11 OS=Mus musculus GN=Sec11a PE=1 SV=1;tr|D3YTS1|D3YTS1_MOUSE Signal peptidase	5	3	3	3	15.9	19.569		34433000	2363300	0	0	5291600	8145000	6954900	3181500	3709600	4786800
D3YU12;Q8K2T1;G5E8S7	tr|D3YU12|D3YU12_MOUSE NmrA-like family domain-containing protein 1 OS=Mus musculus GN=Nmral1 PE=1 SV=1;sp|Q8K2T1|NMRL1_MOUSE NmrA-like family domain-containing protein 1 OS=Mus musculus GN=Nmral1 PE=1 SV=1;tr|G5E8S7|G5E8S7_MOUSE NmrA-like family domain co	3	6	6	6	21.4	33.081		23098000	441800	0	1412500	1932600	2873200	6077700	4254400	1144200	4962000
D3YU17;Q8VCM8	tr|D3YU17|D3YU17_MOUSE Nicalin OS=Mus musculus GN=Ncln PE=1 SV=1;sp|Q8VCM8|NCLN_MOUSE Nicalin OS=Mus musculus GN=Ncln PE=1 SV=2	2	1	1	1	1.4	62.779		4269800	250700	0	0	633480	888810	557630	717820	575910	645480
D3YUK4;Q9DCS9	tr|D3YUK4|D3YUK4_MOUSE NADH dehydrogenase [ubiquinone] 1 beta subcomplex subunit 10 (Fragment) OS=Mus musculus GN=Ndufb10 PE=1 SV=1;sp|Q9DCS9|NDUBA_MOUSE NADH dehydrogenase [ubiquinone] 1 beta subcomplex subunit 10 OS=Mus musculus GN=Ndufb10 PE=1 SV=3	2	1	1	1	12.8	17.74		18169000	1735000	1001800	1538200	1570700	1491300	3324700	2642800	2130200	2734000
D3YUM1;Q91YT0;D3YXX5;D6RG60;D3Z0K1;D3Z1U9	tr|D3YUM1|D3YUM1_MOUSE NADH dehydrogenase [ubiquinone] flavoprotein 1, mitochondrial OS=Mus musculus GN=Ndufv1 PE=1 SV=1;sp|Q91YT0|NDUV1_MOUSE NADH dehydrogenase [ubiquinone] flavoprotein 1, mitochondrial OS=Mus musculus GN=Ndufv1 PE=1 SV=1;tr|D3YXX5|D3YXX	6	2	2	2	4.4	49.913		12144000	1045900	1052900	793550	1611300	1714400	2709500	640190	1598200	977960
D3YVV1;Q0VEI2;Q8BHG3;Q8VEK0	tr|D3YVV1|D3YVV1_MOUSE Cell cycle control protein 50A OS=Mus musculus GN=Tmem30a PE=1 SV=1;tr|Q0VEI2|Q0VEI2_MOUSE MCG64446 OS=Mus musculus GN=Tmem30b PE=2 SV=1;sp|Q8BHG3|CC50B_MOUSE Cell cycle control protein 50B OS=Mus musculus GN=Tmem30b PE=2 SV=1;sp|Q8V	4	1	1	1	2.4	37.178		9982800	4672500	1799300	1719800	0	0	1791200	0	0	0
D3YVW2;Q8BXA1	tr|D3YVW2|D3YVW2_MOUSE Golgi integral membrane protein 4 OS=Mus musculus GN=Golim4 PE=1 SV=1;sp|Q8BXA1|GOLI4_MOUSE Golgi integral membrane protein 4 OS=Mus musculus GN=Golim4 PE=1 SV=1	2	1	1	1	1.5	79.904		1717400	0	976110	741240	0	0	0	0	0	0
D3YWD5;Q9D2V8;D6RI23;A0A0J9YVE9;A0A0J9YUD0;D3YYM9	tr|D3YWD5|D3YWD5_MOUSE Major facilitator superfamily domain-containing protein 10 (Fragment) OS=Mus musculus GN=Mfsd10 PE=1 SV=8;sp|Q9D2V8|MFS10_MOUSE Major facilitator superfamily domain-containing protein 10 OS=Mus musculus GN=Mfsd10 PE=1 SV=1;tr|D6RI23|	6	2	2	2	10.8	30.062		23554000	2345000	0	0	2971300	4114700	3298000	3308800	4436600	3080100
D3YWF6;Q7TQI3;D3Z7K0	tr|D3YWF6|D3YWF6_MOUSE Ubiquitin thioesterase OTUB1 OS=Mus musculus GN=Otub1 PE=1 SV=1;sp|Q7TQI3|OTUB1_MOUSE Ubiquitin thioesterase OTUB1 OS=Mus musculus GN=Otub1 PE=1 SV=2;tr|D3Z7K0|D3Z7K0_MOUSE Ubiquitin thioesterase OTUB1 (Fragment) OS=Mus musculus GN=O	3	4	4	4	20.7	28.036		94608000	7208200	9556300	9939300	10040000	15005000	14380000	5620300	11465000	11394000
D3YWJ5;J3QM73;D3Z325;D3Z312;Q921Z5;D3Z205;D3Z0Q1	tr|D3YWJ5|D3YWJ5_MOUSE Tumor necrosis factor alpha-induced protein 8 OS=Mus musculus GN=Tnfaip8 PE=1 SV=1;tr|J3QM73|J3QM73_MOUSE Tumor necrosis factor alpha-induced protein 8 (Fragment) OS=Mus musculus GN=Tnfaip8 PE=1 SV=1;tr|D3Z325|D3Z325_MOUSE Tumor necr	7	4	4	4	26.6	21.82		208710000	21362000	24297000	17323000	30093000	11529000	39408000	22700000	24397000	17598000
D3YWT1;D3Z3N4	tr|D3YWT1|D3YWT1_MOUSE Heterogeneous nuclear ribonucleoprotein H3 OS=Mus musculus GN=Hnrnph3 PE=1 SV=1;tr|D3Z3N4|D3Z3N4_MOUSE Heterogeneous nuclear ribonucleoprotein H3 OS=Mus musculus GN=Hnrnph3 PE=1 SV=1	2	1	1	1	5.1	35.181		9079400	1145800	262710	0	845120	1503600	2110200	0	1228400	1983600
F6XUR8;F6TCV0;S4R1B3;D3YX28;D3YX27;Q3TXN0;Q80V84;Q3UJR3;Q9JIY5	tr|F6XUR8|F6XUR8_MOUSE Serine protease HTRA2, mitochondrial (Fragment) OS=Mus musculus GN=Htra2 PE=1 SV=1;tr|F6TCV0|F6TCV0_MOUSE Serine protease HTRA2, mitochondrial (Fragment) OS=Mus musculus GN=Htra2 PE=1 SV=1;tr|S4R1B3|S4R1B3_MOUSE Serine protease HTRA2	9	1	1	1	9.6	26.656		4631400	1018700	0	0	416010	0	757890	0	917950	1520800
D3YX34;Q3TB96;Q3T9V8;E9Q586;Q6NZM3;E9Q3M3;O08788	tr|D3YX34|D3YX34_MOUSE Dynactin subunit 1 OS=Mus musculus GN=Dctn1 PE=1 SV=1;tr|Q3TB96|Q3TB96_MOUSE Uncharacterized protein OS=Mus musculus GN=Dctn1 PE=2 SV=1;tr|Q3T9V8|Q3T9V8_MOUSE Uncharacterized protein OS=Mus musculus GN=Dctn1 PE=2 SV=1;tr|E9Q586|E9Q58	7	3	3	3	6.3	126.82		4633400	190540	0	0	548190	389020	924920	950270	290810	1339600
D3YX62;Q544R7;Q3U6W4;O70252;D3YXN4	tr|D3YX62|D3YX62_MOUSE Heme oxygenase 2 (Fragment) OS=Mus musculus GN=Hmox2 PE=1 SV=1;tr|Q544R7|Q544R7_MOUSE Heme oxygenase (Decycling) 2 OS=Mus musculus GN=Hmox2 PE=1 SV=1;tr|Q3U6W4|Q3U6W4_MOUSE Uncharacterized protein OS=Mus musculus GN=Hmox2 PE=2 SV=1;s	5	2	2	2	7.9	26.385		52073000	2983800	1330000	1319100	2284100	2596800	11908000	9902900	8767400	10981000
D3YXG2;Q3U2G9;Q9D997;Q9QZ08	tr|D3YXG2|D3YXG2_MOUSE N-acetyl-D-glucosamine kinase OS=Mus musculus GN=Nagk PE=1 SV=1;tr|Q3U2G9|Q3U2G9_MOUSE N-acetylglucosamine kinase, isoform CRA_c OS=Mus musculus GN=Nagk PE=1 SV=1;tr|Q9D997|Q9D997_MOUSE N-acetyl-D-glucosamine kinase OS=Mus musculus G	4	1	1	1	3	36.198		13841000	2673200	2929200	4131200	1959100	0	2148400	0	0	0
S4R1M2;D3YXK2	tr|S4R1M2|S4R1M2_MOUSE Scaffold attachment factor B1 OS=Mus musculus GN=Safb PE=1 SV=1;sp|D3YXK2|SAFB1_MOUSE Scaffold attachment factor B1 OS=Mus musculus GN=Safb PE=1 SV=2	2	7	7	3	10.5	105.32		33946000	4053700	3028300	3166900	3258400	3476100	5015000	3389000	4693800	3864800
D3YXX3;D3Z783;Q8BS26;P31750;D3YYP9	tr|D3YXX3|D3YXX3_MOUSE RAC-alpha serine/threonine-protein kinase (Fragment) OS=Mus musculus GN=Akt1 PE=1 SV=2;tr|D3Z783|D3Z783_MOUSE RAC-alpha serine/threonine-protein kinase OS=Mus musculus GN=Akt1 PE=1 SV=2;tr|Q8BS26|Q8BS26_MOUSE Uncharacterized protein	5	2	2	2	12.9	23.541		14604000	100080	1059400	0	1849000	1904000	3215300	1078000	2352200	3046000
G5E8N3;D3YYC3;O88974	tr|G5E8N3|G5E8N3_MOUSE Histone-lysine N-methyltransferase OS=Mus musculus GN=Setdb1 PE=1 SV=1;tr|D3YYC3|D3YYC3_MOUSE Histone-lysine N-methyltransferase OS=Mus musculus GN=Setdb1 PE=1 SV=1;sp|O88974|SETB1_MOUSE Histone-lysine N-methyltransferase SETDB1 OS=M	3	1	1	1	0.9	144.54		83036000	22225000	5345800	1337900	22854000	2649900	15150000	0	13475000	0
D3YYD0;Q3UZZ4;B7ZNU5;B2RUF9	tr|D3YYD0|D3YYD0_MOUSE Olfactomedin-4 OS=Mus musculus GN=Olfm4 PE=1 SV=1;sp|Q3UZZ4|OLFM4_MOUSE Olfactomedin-4 OS=Mus musculus GN=Olfm4 PE=2 SV=1;tr|B7ZNU5|B7ZNU5_MOUSE Olfm4 protein OS=Mus musculus GN=Olfm4 PE=2 SV=1;tr|B2RUF9|B2RUF9_MOUSE Olfm4 protein OS	4	11	11	11	22.1	60.967		403440000	55965000	42552000	29845000	8571300	12140000	11031000	67660000	90437000	85241000
D3YYD5;D3Z645;Q9QZ88;D3YW98	tr|D3YYD5|D3YYD5_MOUSE Vacuolar protein sorting-associated protein 29 (Fragment) OS=Mus musculus GN=Vps29 PE=1 SV=1;tr|D3Z645|D3Z645_MOUSE Vacuolar protein sorting-associated protein 29 OS=Mus musculus GN=Vps29 PE=1 SV=1;sp|Q9QZ88|VPS29_MOUSE Vacuolar prot	4	4	4	4	35.5	13.723		103150000	8921300	8702600	12937000	10569000	11472000	14980000	12349000	12513000	10709000
D3YYE1;D3Z7M9;O35381;F6UFG6;Q64G17	tr|D3YYE1|D3YYE1_MOUSE Acidic leucine-rich nuclear phosphoprotein 32 family member A (Fragment) OS=Mus musculus GN=Anp32a PE=1 SV=1;tr|D3Z7M9|D3Z7M9_MOUSE Acidic leucine-rich nuclear phosphoprotein 32 family member A OS=Mus musculus GN=Anp32a PE=1 SV=1;sp|	5	10	10	7	38.4	22.954		1562300000	113210000	102390000	80521000	231610000	75889000	307360000	120600000	169660000	361010000
F6THL5;D3YYF2;E9Q7L3;D3Z1W6;E9Q7L2;D3Z1N4;E9Q4Y5;F8VQD1;Q8BSQ9;D6RIL0;D6RI94;D3Z3R4	tr|F6THL5|F6THL5_MOUSE Protein polybromo-1 (Fragment) OS=Mus musculus GN=Pbrm1 PE=1 SV=1;tr|D3YYF2|D3YYF2_MOUSE Protein polybromo-1 (Fragment) OS=Mus musculus GN=Pbrm1 PE=1 SV=8;tr|E9Q7L3|E9Q7L3_MOUSE Protein polybromo-1 OS=Mus musculus GN=Pbrm1 PE=1 SV=1;	12	2	2	2	1.8	126.23		3472100	0	178350	212170	0	0	0	1012000	1338100	731530
D3YYK8;E9Q6X0;Q8R001;Q3TG90	tr|D3YYK8|D3YYK8_MOUSE Microtubule-associated protein RP/EB family member 2 (Fragment) OS=Mus musculus GN=Mapre2 PE=1 SV=1;tr|E9Q6X0|E9Q6X0_MOUSE Microtubule-associated protein RP/EB family member 2 OS=Mus musculus GN=Mapre2 PE=1 SV=1;sp|Q8R001|MARE2_MOUSE	4	2	2	2	7.7	29.425		24792000	2864100	2394000	2096400	2701700	1877700	1700400	4512500	5561500	1083200
Q3U2S1;D3YYP5;E9Q5V3;Q3TBE9;Q9Z2D3	tr|Q3U2S1|Q3U2S1_MOUSE Uncharacterized protein OS=Mus musculus GN=Dfna5 PE=2 SV=1;tr|D3YYP5|D3YYP5_MOUSE Non-syndromic hearing impairment protein 5 homolog OS=Mus musculus GN=Dfna5 PE=1 SV=2;tr|E9Q5V3|E9Q5V3_MOUSE Non-syndromic hearing impairment protein 5	5	5	5	5	16	44.291		29846000	1289400	619870	736180	3027200	4819400	6997600	2987600	3540500	5827700
D3YYT1;Q922P9	tr|D3YYT1|D3YYT1_MOUSE Putative oxidoreductase GLYR1 OS=Mus musculus GN=Glyr1 PE=1 SV=1;sp|Q922P9|GLYR1_MOUSE Putative oxidoreductase GLYR1 OS=Mus musculus GN=Glyr1 PE=1 SV=1	2	6	6	6	13.8	60.435		33837000	2726000	0	1025300	4158700	4383000	6269400	4426100	5783300	5065600
D3YYW8;Q91V81	tr|D3YYW8|D3YYW8_MOUSE RNA-binding protein 42 OS=Mus musculus GN=Rbm42 PE=1 SV=1;sp|Q91V81|RBM42_MOUSE RNA-binding protein 42 OS=Mus musculus GN=Rbm42 PE=1 SV=1	2	2	2	2	6	47.214		7613400	0	0	0	1130800	1361500	1502500	566730	1458900	1593000
D3YZ57;P39688;A0A0J9YUV2;Q3TLX4;E9Q696;P06240	tr|D3YZ57|D3YZ57_MOUSE Tyrosine-protein kinase OS=Mus musculus GN=Fyn PE=1 SV=1;sp|P39688|FYN_MOUSE Tyrosine-protein kinase Fyn OS=Mus musculus GN=Fyn PE=1 SV=4	6	4	1	0	7.3	54.426		13425000	1589900	3188300	1675700	1443800	1628300	1796400	0	2102600	0
D3YZ62;D3Z4J3;Q99104;F6TDE5;G5E8G6;G3X9Y9;P21271	tr|D3YZ62|D3YZ62_MOUSE Unconventional myosin-Va OS=Mus musculus GN=Myo5a PE=1 SV=1;tr|D3Z4J3|D3Z4J3_MOUSE Unconventional myosin-Va OS=Mus musculus GN=Myo5a PE=1 SV=1;sp|Q99104|MYO5A_MOUSE Unconventional myosin-Va OS=Mus musculus GN=Myo5a PE=1 SV=2;tr|F6TDE	7	4	4	4	3.1	212.33		1657100	122310	166940	221470	93816	152970	329790	0	326070	243750
E9Q4Q2;D3YZC9;D3YZD0;Q3UK67;Q3UI45;Q64213;D3YVH4;Q3TZI3;F8WHF9;D6RDB7	tr|E9Q4Q2|E9Q4Q2_MOUSE Splicing factor 1 OS=Mus musculus GN=Sf1 PE=1 SV=1;tr|D3YZC9|D3YZC9_MOUSE Splicing factor 1 OS=Mus musculus GN=Sf1 PE=1 SV=1;tr|D3YZD0|D3YZD0_MOUSE Splicing factor 1 OS=Mus musculus GN=Sf1 PE=1 SV=1;tr|Q3UK67|Q3UK67_MOUSE Uncharacter	10	8	8	8	17.7	59.698		116400000	13613000	14286000	8967000	10564000	13859000	13478000	12171000	16063000	13400000
E9Q7G1;D3YZZ5	tr|E9Q7G1|E9Q7G1_MOUSE Transmembrane p24-trafficking protein 7 OS=Mus musculus GN=Tmed7 PE=1 SV=1;tr|D3YZZ5|D3YZZ5_MOUSE Transmembrane p24-trafficking protein 7 OS=Mus musculus GN=Tmed7 PE=1 SV=1	2	2	2	2	11.7	21.276		12186000	0	2135400	0	1724400	1774800	1832000	1475100	1326700	1917700
D3Z007;Q0VB14;Q8K4B2;D6RCU1	tr|D3Z007|D3Z007_MOUSE Interleukin-1 receptor-associated kinase 3 OS=Mus musculus GN=Irak3 PE=1 SV=1;tr|Q0VB14|Q0VB14_MOUSE Interleukin-1 receptor-associated kinase 3 OS=Mus musculus GN=Irak3 PE=2 SV=1;sp|Q8K4B2|IRAK3_MOUSE Interleukin-1 receptor-associate	4	2	2	2	4.4	58.34		904100	593040	0	0	143430	167630	0	0	0	0
D3Z041;P41216;F6WNZ2;D3Z457;Q3UKS0;Q3UC67;Q8JZR0;Q9D9S0;A0A1B0GRS8;D3YVF6	tr|D3Z041|D3Z041_MOUSE Long-chain-fatty-acid--CoA ligase 1 OS=Mus musculus GN=Acsl1 PE=1 SV=1;sp|P41216|ACSL1_MOUSE Long-chain-fatty-acid--CoA ligase 1 OS=Mus musculus GN=Acsl1 PE=1 SV=2	10	17	17	17	26.6	78.034		92354000	7910000	6005600	8191100	11473000	11209000	14661000	10443000	10522000	11940000
D3Z061;Q8C7R4	tr|D3Z061|D3Z061_MOUSE Ubiquitin-like modifier-activating enzyme 6 OS=Mus musculus GN=Uba6 PE=1 SV=1;sp|Q8C7R4|UBA6_MOUSE Ubiquitin-like modifier-activating enzyme 6 OS=Mus musculus GN=Uba6 PE=1 SV=1	2	4	4	4	5.4	114.77		2557600	284970	0	40352	415010	395660	701220	181520	232560	306270
F6XC54;D3Z074;E9PXV7;E9PV41;Q5DTQ4;O08808;Q3US76;Q3U104;Q3UX40	tr|F6XC54|F6XC54_MOUSE Protein diaphanous homolog 1 OS=Mus musculus GN=Diaph1 PE=1 SV=1;tr|D3Z074|D3Z074_MOUSE Protein diaphanous homolog 1 OS=Mus musculus GN=Diaph1 PE=1 SV=2;tr|E9PXV7|E9PXV7_MOUSE Protein diaphanous homolog 1 OS=Mus musculus GN=Diaph1 PE	9	15	15	15	14.1	135.84		50551000	4885100	3688000	2678500	6163700	5237500	7985700	6281100	7387700	6243700
D3Z079;Q8K400;D3Z2Q2;F6WXQ4	tr|D3Z079|D3Z079_MOUSE Syntaxin-binding protein 5 OS=Mus musculus GN=Stxbp5 PE=1 SV=1;sp|Q8K400|STXB5_MOUSE Syntaxin-binding protein 5 OS=Mus musculus GN=Stxbp5 PE=1 SV=3;tr|D3Z2Q2|D3Z2Q2_MOUSE Syntaxin-binding protein 5 OS=Mus musculus GN=Stxbp5 PE=1 SV=1	4	5	5	5	6.6	123.6		8378200	1057900	504730	752280	845520	873510	724750	997870	1304900	1316800
D3Z0D8;Q3THV8;P11157;F6RUC3	tr|D3Z0D8|D3Z0D8_MOUSE Ribonucleoside-diphosphate reductase subunit M2 (Fragment) OS=Mus musculus GN=Rrm2 PE=1 SV=1;tr|Q3THV8|Q3THV8_MOUSE Uncharacterized protein OS=Mus musculus GN=Rrm2 PE=2 SV=1;sp|P11157|RIR2_MOUSE Ribonucleoside-diphosphate reductase s	4	2	2	2	11.1	26.028		8522800	1257200	1883200	2376500	721760	993120	0	1291000	0	0
D3Z0F5;Q3UIT2;O88545	tr|D3Z0F5|D3Z0F5_MOUSE COP9 signalosome complex subunit 6 OS=Mus musculus GN=Cops6 PE=1 SV=1;tr|Q3UIT2|Q3UIT2_MOUSE COP9 (Constitutive photomorphogenic) homolog, subunit 6 (Arabidopsis thaliana), isoform CRA_b OS=Mus musculus GN=Cops6 PE=1 SV=1;sp|O88545|C	3	2	2	2	8.1	33.591		12145000	712940	0	0	1140800	1395400	1496800	3143900	1312900	2942300
D3Z0M9	tr|D3Z0M9|D3Z0M9_MOUSE DEAD (Asp-Glu-Ala-Asp) box polypeptide 23 OS=Mus musculus GN=Ddx23 PE=1 SV=1	1	4	4	4	5.7	95.493		8500600	416740	273040	620540	322190	3739500	708570	773380	666920	979730
D3Z0Y1;Q9D4W6;P57725	tr|D3Z0Y1|D3Z0Y1_MOUSE SAM domain-containing protein SAMSN-1 OS=Mus musculus GN=Samsn1 PE=1 SV=1;tr|Q9D4W6|Q9D4W6_MOUSE SAM domain, SH3 domain and nuclear localization signals, 1, isoform CRA_b OS=Mus musculus GN=Samsn1 PE=2 SV=1;sp|P57725|SAMN1_MOUSE SAM	3	2	2	2	5.4	55.779		3288800	329480	348090	317810	363730	347520	712660	547590	321900	0
D3Z637;D3Z125;E9PUA7;D3Z7X7;F8WHQ1;Q62393;D3Z2U2	tr|D3Z637|D3Z637_MOUSE MCG10134, isoform CRA_c OS=Mus musculus GN=Tpd52 PE=1 SV=1;tr|D3Z125|D3Z125_MOUSE Tumor protein D52 (Fragment) OS=Mus musculus GN=Tpd52 PE=1 SV=1;tr|E9PUA7|E9PUA7_MOUSE Tumor protein D52 OS=Mus musculus GN=Tpd52 PE=1 SV=1;tr|D3Z7X7|D	7	4	4	4	29.6	17.603		148240000	8104400	17116000	10267000	15682000	14106000	21425000	20826000	22497000	18215000
D3Z131;D3Z132;Q5U4D9;D3YUL7;F6S2T7	tr|D3Z131|D3Z131_MOUSE THO complex subunit 6 homolog OS=Mus musculus GN=Thoc6 PE=1 SV=1;tr|D3Z132|D3Z132_MOUSE THO complex subunit 6 homolog OS=Mus musculus GN=Thoc6 PE=1 SV=1;sp|Q5U4D9|THOC6_MOUSE THO complex subunit 6 homolog OS=Mus musculus GN=Thoc6 PE=	5	2	2	2	7.4	32.714		18073000	1820500	1409300	2058100	1321500	3402700	1608300	3003000	2503900	946160
D3Z1H9;Q7TMS6;Q3U011;Q9JL62;D3Z1H8	tr|D3Z1H9|D3Z1H9_MOUSE Glycolipid transfer protein OS=Mus musculus GN=Gltp PE=1 SV=1;tr|Q7TMS6|Q7TMS6_MOUSE Glycolipid transfer protein OS=Mus musculus GN=Gltp PE=2 SV=1;tr|Q3U011|Q3U011_MOUSE Uncharacterized protein OS=Mus musculus GN=Gltp PE=2 SV=1;sp|Q9	5	3	3	3	17.9	21.535		34280000	5555700	1988500	2023000	4594500	2782500	4430500	5586000	4591500	2727300
D3Z2Z1;F8WIA1;Q922J3;Q8C0S5;F6RCU2;D3Z3M7;Q9Z0H8	tr|D3Z2Z1|D3Z2Z1_MOUSE CAP-Gly domain-containing linker protein 1 OS=Mus musculus GN=Clip1 PE=1 SV=1;tr|F8WIA1|F8WIA1_MOUSE CAP-Gly domain-containing linker protein 1 OS=Mus musculus GN=Clip1 PE=1 SV=1;sp|Q922J3|CLIP1_MOUSE CAP-Gly domain-containing linker	7	3	3	3	2.8	160.01		1554000	0	103880	258130	96907	117320	176020	177990	194810	428970
D3Z315;O89079;Q9D1J2;F6YFR7;E9Q6I5;F6XIG5	tr|D3Z315|D3Z315_MOUSE Coatomer subunit epsilon (Fragment) OS=Mus musculus GN=Cope PE=1 SV=1;sp|O89079|COPE_MOUSE Coatomer subunit epsilon OS=Mus musculus GN=Cope PE=1 SV=3;tr|Q9D1J2|Q9D1J2_MOUSE Coatomer subunit epsilon OS=Mus musculus GN=Cope PE=2 SV=1;t	6	6	6	6	48.9	25.37		54973000	470580	1501300	2177000	6980400	8209400	9604500	7507800	6460500	12061000
D3Z5X8;D3Z7N3;D3Z345;Q08288	tr|D3Z5X8|D3Z5X8_MOUSE Cell growth-regulating nucleolar protein (Fragment) OS=Mus musculus GN=Lyar PE=1 SV=1;tr|D3Z7N3|D3Z7N3_MOUSE Cell growth-regulating nucleolar protein (Fragment) OS=Mus musculus GN=Lyar PE=1 SV=1;tr|D3Z345|D3Z345_MOUSE Cell growth-reg	4	1	1	1	10.7	14.956		14719000	1259900	0	0	2535200	3310700	3173500	0	0	4439600
D3Z3A0;Q8BVM6;Q9DCL8	tr|D3Z3A0|D3Z3A0_MOUSE MCG126099, isoform CRA_b OS=Mus musculus GN=Ppp1r2 PE=1 SV=1;tr|Q8BVM6|Q8BVM6_MOUSE Uncharacterized protein OS=Mus musculus GN=Ppp1r2 PE=2 SV=1;sp|Q9DCL8|IPP2_MOUSE Protein phosphatase inhibitor 2 OS=Mus musculus GN=Ppp1r2 PE=1 SV=3	3	1	1	1	5.6	21.919		152930000	20237000	25516000	18302000	13245000	4345500	19421000	19098000	18308000	14459000
G3XA39;D3Z3B4;Q8C4C0;E9Q7X0;Q8CAV3;Q3UXF4;Q99K73;Q9WU00;Q8BSP8;Q3UYQ3	tr|G3XA39|G3XA39_MOUSE Nuclear respiratory factor 1 OS=Mus musculus GN=Nrf1 PE=1 SV=1;tr|D3Z3B4|D3Z3B4_MOUSE Nuclear respiratory factor 1 OS=Mus musculus GN=Nrf1 PE=1 SV=1;tr|Q8C4C0|Q8C4C0_MOUSE Uncharacterized protein OS=Mus musculus GN=Nrf1 PE=2 SV=1;tr|	10	2	2	2	4.5	49.126		19687000	3539800	1182100	1325700	801440	2979300	4035300	1112500	3239900	1471200
D3Z3F1;Q9D824	tr|D3Z3F1|D3Z3F1_MOUSE Pre-mRNA 3-end-processing factor FIP1 (Fragment) OS=Mus musculus GN=Fip1l1 PE=1 SV=2;sp|Q9D824|FIP1_MOUSE Pre-mRNA 3-end-processing factor FIP1 OS=Mus musculus GN=Fip1l1 PE=1 SV=1	2	3	3	3	10.1	46.449		23361000	2508600	3027300	4535400	936330	1126900	2267000	3374600	2481800	3102800
D3Z3J6;G3UYE5;F6Y616;Q8VE62	tr|D3Z3J6|D3Z3J6_MOUSE Polyadenylate-binding protein-interacting protein 1 OS=Mus musculus GN=Paip1 PE=1 SV=1;tr|G3UYE5|G3UYE5_MOUSE Polyadenylate-binding protein-interacting protein 1 OS=Mus musculus GN=Paip1 PE=1 SV=1;tr|F6Y616|F6Y616_MOUSE Polyadenylate	4	2	2	2	6.8	42.06		3705900	543520	0	936660	0	0	0	0	0	2225700
D3Z3N2;F8WHG5;Q3TY95;Q60823;D3YXM7;Q8CE74;D3Z5X2;D3Z0M3;D3YZJ5;D3Z490	tr|D3Z3N2|D3Z3N2_MOUSE RAC-beta serine/threonine-protein kinase (Fragment) OS=Mus musculus GN=Akt2 PE=1 SV=1;tr|F8WHG5|F8WHG5_MOUSE RAC-beta serine/threonine-protein kinase OS=Mus musculus GN=Akt2 PE=1 SV=1;tr|Q3TY95|Q3TY95_MOUSE MCG22777, isoform CRA_a OS	10	3	3	3	12.7	26.562		7945700	1006600	2318500	0	696710	0	908010	0	914850	2101000
D3Z487;Q99LD9;D3Z7J6;Q8BK57	tr|D3Z487|D3Z487_MOUSE Translation initiation factor eIF-2B subunit beta (Fragment) OS=Mus musculus GN=Eif2b2 PE=1 SV=1;sp|Q99LD9|EI2BB_MOUSE Translation initiation factor eIF-2B subunit beta OS=Mus musculus GN=Eif2b2 PE=1 SV=1;tr|D3Z7J6|D3Z7J6_MOUSE Trans	4	3	3	3	17.5	33.816		5060300	508140	2749200	898370	0	0	0	904620	0	0
D3Z494;Q8BIV6;G5E895;Q8R318;S4R2G9;P45377	tr|D3Z494|D3Z494_MOUSE Aldo-keto reductase family 1, member B10 (aldose reductase) OS=Mus musculus GN=Akr1b10 PE=1 SV=1;tr|Q8BIV6|Q8BIV6_MOUSE Uncharacterized protein OS=Mus musculus GN=Akr1b10 PE=2 SV=1;tr|G5E895|G5E895_MOUSE Aldo-keto reductase family 1,	6	2	2	1	6.6	32.745		51935000	4583100	2837400	2779300	5438400	7929000	7367300	7689700	5156300	8154700
G3UWQ8;G3UXN1;Q3TLA1;D3Z4I3;Q62176	tr|G3UWQ8|G3UWQ8_MOUSE RNA-binding protein 38 OS=Mus musculus GN=Rbm38 PE=1 SV=1;tr|G3UXN1|G3UXN1_MOUSE RNA-binding protein 38 (Fragment) OS=Mus musculus GN=Rbm38 PE=1 SV=1;tr|Q3TLA1|Q3TLA1_MOUSE Uncharacterized protein OS=Mus musculus GN=Rbm38 PE=2 SV=1;s	5	1	1	1	20.5	8.3292		0	0	0	0	0	0	0	0	0	0
D3Z7S0;D3Z4J5;Q9D1H7	tr|D3Z7S0|D3Z7S0_MOUSE Golgi to ER traffic protein 4 homolog (Fragment) OS=Mus musculus GN=Get4 PE=1 SV=1;tr|D3Z4J5|D3Z4J5_MOUSE Golgi to ER traffic protein 4 homolog (Fragment) OS=Mus musculus GN=Get4 PE=1 SV=1;sp|Q9D1H7|GET4_MOUSE Golgi to ER traffic pro	3	1	1	1	7.6	21.972		6212900	0	0	0	675860	901310	1044500	894290	1340700	1356200
D3Z5W6;D3Z4N9;Q922J9;D3Z072	tr|D3Z5W6|D3Z5W6_MOUSE Fatty acyl-CoA reductase (Fragment) OS=Mus musculus GN=Far1 PE=1 SV=1;tr|D3Z4N9|D3Z4N9_MOUSE Fatty acyl-CoA reductase (Fragment) OS=Mus musculus GN=Far1 PE=1 SV=8;sp|Q922J9|FACR1_MOUSE Fatty acyl-CoA reductase 1 OS=Mus musculus GN=Fa	4	2	2	2	13.8	20.67		19029000	2237000	0	2804700	2573900	2493100	3821100	1240800	2411000	1447800
D3Z512;Q3UM14;P56542;D3Z5U3	tr|D3Z512|D3Z512_MOUSE Deoxyribonuclease II alpha OS=Mus musculus GN=Dnase2a PE=1 SV=1;tr|Q3UM14|Q3UM14_MOUSE Deoxyribonuclease II alpha OS=Mus musculus GN=Dnase2a PE=1 SV=1;sp|P56542|DNS2A_MOUSE Deoxyribonuclease-2-alpha OS=Mus musculus GN=Dnase2 PE=1 SV=	4	2	2	2	4.8	36.51		6438800	780150	1558700	1488700	321940	366180	0	576900	659360	686830
D3Z563;Q548W7;Q3ULV8;Q4VWZ5;P31786	tr|D3Z563|D3Z563_MOUSE Acyl-CoA-binding protein OS=Mus musculus GN=Dbi PE=1 SV=1;tr|Q548W7|Q548W7_MOUSE Diazepam binding inhibitor OS=Mus musculus GN=Dbi PE=1 SV=1;tr|Q3ULV8|Q3ULV8_MOUSE Uncharacterized protein OS=Mus musculus GN=Dbi PE=2 SV=1;tr|Q4VWZ5|Q4	5	1	1	1	28.6	7.2373		737080000	87768000	4804400	4465400	90312000	86149000	141720000	100170000	92598000	129100000
D6RFV4;D3Z5H3;Q8BM48;Q9D8V7	tr|D6RFV4|D6RFV4_MOUSE Sec11-like 3 (S. cerevisiae), isoform CRA_c OS=Mus musculus GN=Sec11c PE=1 SV=1;tr|D3Z5H3|D3Z5H3_MOUSE Signal peptidase complex catalytic subunit SEC11C (Fragment) OS=Mus musculus GN=Sec11c PE=1 SV=1;tr|Q8BM48|Q8BM48_MOUSE Signal pep	4	1	1	1	20.2	11.005		18916000	0	0	0	2628800	4023000	4023400	1301000	2627400	4312500
D3Z5I1;Q3UPF5;Q8K302;G3X9X5	tr|D3Z5I1|D3Z5I1_MOUSE Zinc finger CCCH-type antiviral protein 1 OS=Mus musculus GN=Zc3hav1 PE=1 SV=1;sp|Q3UPF5|ZCCHV_MOUSE Zinc finger CCCH-type antiviral protein 1 OS=Mus musculus GN=Zc3hav1 PE=1 SV=1;tr|Q8K302|Q8K302_MOUSE Zc3hav1 protein OS=Mus musculu	4	3	3	3	3.6	112.53		9956400	544740	1896300	1618400	199140	1414800	1223600	198760	1588400	1272300
Q3UKV4;D3Z5N6;Q61103;F8WIP7	tr|Q3UKV4|Q3UKV4_MOUSE Uncharacterized protein OS=Mus musculus GN=Dpf2 PE=2 SV=1;tr|D3Z5N6|D3Z5N6_MOUSE Zinc finger protein ubi-d4 OS=Mus musculus GN=Dpf2 PE=1 SV=1;sp|Q61103|REQU_MOUSE Zinc finger protein ubi-d4 OS=Mus musculus GN=Dpf2 PE=1 SV=1;tr|F8WIP7	4	3	3	3	10.2	44.328		15713000	1792700	2501500	3124200	1945700	1532000	1869000	655550	2291800	0
S4R270;D3Z6Q9;S4R1B8;S4R2J8;S4R171;S4R1Q1	tr|S4R270|S4R270_MOUSE Bridging integrator 2 OS=Mus musculus GN=Bin2 PE=1 SV=1;sp|D3Z6Q9|BIN2_MOUSE Bridging integrator 2 OS=Mus musculus GN=Bin2 PE=1 SV=1;tr|S4R1B8|S4R1B8_MOUSE Bridging integrator 2 OS=Mus musculus GN=Bin2 PE=1 SV=1;tr|S4R2J8|S4R2J8_MOUS	6	11	11	11	29.5	54.766		375330000	36935000	30785000	40512000	36830000	29567000	55928000	38584000	51159000	55028000
D3Z6T3;P70269	tr|D3Z6T3|D3Z6T3_MOUSE Cathepsin E OS=Mus musculus GN=Ctse PE=1 SV=1;sp|P70269|CATE_MOUSE Cathepsin E OS=Mus musculus GN=Ctse PE=1 SV=2	2	4	4	4	10.4	39.247		249040000	6280400	7407900	10537000	44930000	39158000	64199000	13190000	30144000	33193000
F6QYZ5;D3Z6T6;E9QNE5;Q9ET66	tr|F6QYZ5|F6QYZ5_MOUSE Peptidase inhibitor 16 (Fragment) OS=Mus musculus GN=Pi16 PE=1 SV=1;tr|D3Z6T6|D3Z6T6_MOUSE Peptidase inhibitor 16 OS=Mus musculus GN=Pi16 PE=1 SV=1;tr|E9QNE5|E9QNE5_MOUSE Peptidase inhibitor 16 OS=Mus musculus GN=Pi16 PE=1 SV=1;sp|Q9	4	1	1	1	6.1	25.565		6730200	2182200	2511400	2036600	0	0	0	0	0	0
E9QAS9;Q547R0;E9QAT0;D3Z6U8;E9QNF5;Q6AXB7;E9QAS8;P35922;Q8C7U4;A0A0H2UH27;A0A0G2JEP0;Q3TA75;Q6P5B5;Q9WVR4;Q61584	tr|E9QAS9|E9QAS9_MOUSE Synaptic functional regulator FMR1 OS=Mus musculus GN=Fmr1 PE=1 SV=1;tr|Q547R0|Q547R0_MOUSE Fragile X mental retardation protein FMRP OS=Mus musculus GN=Fmr1 PE=2 SV=1;tr|E9QAT0|E9QAT0_MOUSE Synaptic functional regulator FMR1 OS=Mus	15	2	2	2	3.4	65.918		2773200	0	0	806120	490040	0	670160	0	0	806870
D3Z6Z7;Q6KAS9;Q8C2K5;A0A0R4J1U7	tr|D3Z6Z7|D3Z6Z7_MOUSE MCG125477, isoform CRA_a OS=Mus musculus GN=Rasal3 PE=1 SV=1;tr|Q6KAS9|Q6KAS9_MOUSE MFLJ00087 protein (Fragment) OS=Mus musculus GN=Rasal3 PE=2 SV=1;sp|Q8C2K5|RASL3_MOUSE RAS protein activator like-3 OS=Mus musculus GN=Rasal3 PE=1 SV	4	2	2	2	2.8	112.19		948340	0	167060	179290	103240	0	169170	157000	0	172590
D3Z723;Q9D056;Q3U1S7;Q8C590;P63139	tr|D3Z723|D3Z723_MOUSE Nuclear transcription factor Y subunit beta (Fragment) OS=Mus musculus GN=Nfyb PE=1 SV=1;tr|Q9D056|Q9D056_MOUSE Uncharacterized protein OS=Mus musculus GN=Nfyb PE=2 SV=1;tr|Q3U1S7|Q3U1S7_MOUSE Uncharacterized protein OS=Mus musculus	5	1	1	1	12.3	11.676		29940000	0	5064400	6095100	3967000	3344200	5444300	6024900	0	0
H7BWX9;D3Z794;P61957;G3UZX6;G3UZ60;G3UWI9;G3UWX9;G3UZA7;Q9Z172	tr|H7BWX9|H7BWX9_MOUSE Small ubiquitin-related modifier 2 OS=Mus musculus GN=Sumo2 PE=1 SV=1;tr|D3Z794|D3Z794_MOUSE Small ubiquitin-related modifier 2 OS=Mus musculus GN=Sumo2 PE=1 SV=1;sp|P61957|SUMO2_MOUSE Small ubiquitin-related modifier 2 OS=Mus muscul	9	2	2	2	41.5	6.0139		2093300000	203590000	307650000	176810000	240340000	128310000	247870000	247700000	181910000	359090000
D3Z795;Q9JK23;D6RG59	tr|D3Z795|D3Z795_MOUSE Proteasome assembly chaperone 1 OS=Mus musculus GN=Psmg1 PE=1 SV=1;sp|Q9JK23|PSMG1_MOUSE Proteasome assembly chaperone 1 OS=Mus musculus GN=Psmg1 PE=1 SV=1;tr|D6RG59|D6RG59_MOUSE Proteasome assembly chaperone 1 OS=Mus musculus GN=Psm	3	2	2	2	8.6	30.54		18370000	1361900	1021500	868880	1483000	1856000	2297200	3492300	2247500	3741800
D3Z7C6;Q9CRH1;Q3TJG6;Q9R0Q7	tr|D3Z7C6|D3Z7C6_MOUSE Prostaglandin E synthase 3 OS=Mus musculus GN=Ptges3 PE=1 SV=1;tr|Q9CRH1|Q9CRH1_MOUSE Uncharacterized protein OS=Mus musculus GN=Ptges3 PE=2 SV=2;tr|Q3TJG6|Q3TJG6_MOUSE Uncharacterized protein OS=Mus musculus GN=Ptges3 PE=2 SV=1;sp|Q	4	5	5	5	42.3	14.982		427670000	46187000	28101000	23099000	40126000	44712000	87251000	50838000	42985000	64372000
D4AFX6;Q6ZQK5	tr|D4AFX6|D4AFX6_MOUSE Centaurin beta 2 OS=Mus musculus GN=Acap2 PE=2 SV=1;sp|Q6ZQK5|ACAP2_MOUSE Arf-GAP with coiled-coil, ANK repeat and PH domain-containing protein 2 OS=Mus musculus GN=Acap2 PE=1 SV=2	2	4	4	4	7.1	88.085		7019700	304190	539830	826590	918090	595680	2095000	284220	1456000	0
G3X922;D4AFX7;Q3UX52;Q3UQJ7;Q8CHD7;Q8BNL1;A0A1L1STR9;A0A087WS25;Q3TNE7	tr|G3X922|G3X922_MOUSE DnaJ heat shock protein family (Hsp40) member C13 OS=Mus musculus GN=Dnajc13 PE=1 SV=1;tr|D4AFX7|D4AFX7_MOUSE DnaJ heat shock protein family (Hsp40) member C13 OS=Mus musculus GN=Dnajc13 PE=1 SV=1;tr|Q3UX52|Q3UX52_MOUSE Uncharacteriz	9	13	13	13	7.5	254.44		6495900	699670	284330	254460	924790	1248300	663630	836040	796010	788600
D5MCW4;Q9CQ89	tr|D5MCW4|D5MCW4_MOUSE Protein CutA OS=Mus musculus GN=Cuta PE=1 SV=1;sp|Q9CQ89|CUTA_MOUSE Protein CutA OS=Mus musculus GN=Cuta PE=1 SV=3	2	1	1	1	9.1	16.453		132650000	10431000	0	0	16829000	16755000	22772000	22021000	19413000	24429000
D6RCG2;Q9D0Q9;Q9CTE8;Q9DB25	tr|D6RCG2|D6RCG2_MOUSE Dolichyl-phosphate beta-glucosyltransferase OS=Mus musculus GN=Alg5 PE=1 SV=1;tr|Q9D0Q9|Q9D0Q9_MOUSE Uncharacterized protein OS=Mus musculus GN=Alg5 PE=2 SV=1;tr|Q9CTE8|Q9CTE8_MOUSE Uncharacterized protein (Fragment) OS=Mus musculus	4	1	1	1	14.3	9.1045		21956000	0	8281600	7531700	0	0	6142400	0	0	0
D6REG4;Q3T9Z2;Q91Z53	tr|D6REG4|D6REG4_MOUSE Glyoxylate reductase/hydroxypyruvate reductase OS=Mus musculus GN=Grhpr PE=1 SV=1;tr|Q3T9Z2|Q3T9Z2_MOUSE Glyoxylate reductase/hydroxypyruvate reductase OS=Mus musculus GN=Grhpr PE=1 SV=1;sp|Q91Z53|GRHPR_MOUSE Glyoxylate reductase/hyd	3	1	1	1	6.1	21.262		29077000	3319300	3319200	6628900	2695400	2667000	3310100	4491400	2645700	0
D6REV5;P70122	tr|D6REV5|D6REV5_MOUSE Ribosome maturation protein SBDS OS=Mus musculus GN=Sbds PE=1 SV=1;sp|P70122|SBDS_MOUSE Ribosome maturation protein SBDS OS=Mus musculus GN=Sbds PE=1 SV=4	2	2	2	2	41.9	4.9128		160970000	15775000	17579000	29672000	16431000	14903000	16575000	16307000	17981000	15751000
D6RFB8;Q91VT0;Q8C2N0;P52431	tr|D6RFB8|D6RFB8_MOUSE DNA polymerase OS=Mus musculus GN=Pold1 PE=1 SV=1;tr|Q91VT0|Q91VT0_MOUSE DNA polymerase OS=Mus musculus GN=Pold1 PE=2 SV=1;tr|Q8C2N0|Q8C2N0_MOUSE DNA polymerase OS=Mus musculus GN=Pold1 PE=2 SV=1;sp|P52431|DPOD1_MOUSE DNA polymerase	4	3	3	3	3.3	108.87		1250400	79757	0	0	167790	0	176550	312320	119280	394740
D6RFS3	tr|D6RFS3|D6RFS3_MOUSE Chloride channel protein 2 OS=Mus musculus GN=Clcn2 PE=1 SV=1	1	1	1	1	1.5	59.101		19967000	0	0	0	0	5598500	0	0	14369000	0
D6RFU9;Q3U4T9;Q3TVX7;O09117	tr|D6RFU9|D6RFU9_MOUSE Synaptophysin-like protein OS=Mus musculus GN=Sypl PE=1 SV=1;tr|Q3U4T9|Q3U4T9_MOUSE Uncharacterized protein OS=Mus musculus GN=Sypl PE=2 SV=1;tr|Q3TVX7|Q3TVX7_MOUSE Uncharacterized protein OS=Mus musculus GN=Sypl PE=2 SV=1;sp|O09117|	4	3	3	3	27.8	8.9142		297930000	34238000	28971000	25785000	27545000	20363000	39572000	40229000	33864000	47366000
D6RH99;D6RJK9;Q9D1X9	tr|D6RH99|D6RH99_MOUSE Transmembrane protein 50B OS=Mus musculus GN=Tmem50b PE=1 SV=1;tr|D6RJK9|D6RJK9_MOUSE Transmembrane protein 50B OS=Mus musculus GN=Tmem50b PE=1 SV=1;sp|Q9D1X9|TM50B_MOUSE Transmembrane protein 50B OS=Mus musculus GN=Tmem50b PE=1 SV=1	3	1	1	1	22.2	4.1147		14853000	1642500	0	0	1601000	1760900	2014500	2863900	2347400	2623100
D6RHQ2;Q8CEB1;Q921Q6;Q544U5;Q8CDV7;P55772	tr|D6RHQ2|D6RHQ2_MOUSE Ectonucleoside triphosphate diphosphohydrolase 1 OS=Mus musculus GN=Entpd1 PE=1 SV=1;tr|Q8CEB1|Q8CEB1_MOUSE Uncharacterized protein (Fragment) OS=Mus musculus GN=Entpd1 PE=2 SV=1;tr|Q921Q6|Q921Q6_MOUSE Entpd1 protein OS=Mus musculus	6	1	1	1	5.6	32.062		1056300	0	0	0	0	0	0	0	0	1056300
D6RI20;Q9CR20	tr|D6RI20|D6RI20_MOUSE Haloacid dehalogenase-like hydrolase domain-containing protein 2 OS=Mus musculus GN=Hdhd2 PE=4 SV=1;sp|Q9CR20|IR3IP_MOUSE Immediate early response 3-interacting protein 1 OS=Mus musculus GN=Ier3ip1 PE=3 SV=1	2	1	1	1	13.2	16.254		27713000	2045900	0	0	4085800	3698300	5623600	0	5851900	6407700
D9J2Z9;D9J300;D9J301;Q2Q7P0;D9J302;Q8CI51;Q9CRA2;A0A0G2JGZ5;D9J303;F8WJI6;E9Q8P5;A0A0G2JEJ0;Q8VDV4	tr|D9J2Z9|D9J2Z9_MOUSE ENH isoform 1b OS=Mus musculus GN=Pdlim5 PE=1 SV=1;tr|D9J300|D9J300_MOUSE ENH isoform 1c OS=Mus musculus GN=Pdlim5 PE=1 SV=1;tr|D9J301|D9J301_MOUSE ENH isoform 1d OS=Mus musculus GN=Pdlim5 PE=1 SV=1;tr|Q2Q7P0|Q2Q7P0_MOUSE ENH1 OS=Mus	13	4	4	4	9.8	52.396		9108000	1080800	755560	1047300	1169000	667980	857310	1096100	512280	1921800
E0CX20;Q6PGH1	tr|E0CX20|E0CX20_MOUSE Protein BUD31 homolog OS=Mus musculus GN=Bud31 PE=1 SV=1;sp|Q6PGH1|BUD31_MOUSE Protein BUD31 homolog OS=Mus musculus GN=Bud31 PE=1 SV=1	2	2	2	2	13.9	17		24079000	1897000	2781700	2504000	2432900	3182400	3708000	2158000	2281000	3133900
E0CXA9;Q3UGM5;Q6PEB6;E0CYJ0;E0CX17;G8JL35	tr|E0CXA9|E0CXA9_MOUSE MOB-like protein phocein OS=Mus musculus GN=Mob4 PE=1 SV=1;tr|Q3UGM5|Q3UGM5_MOUSE Uncharacterized protein OS=Mus musculus GN=Mob4 PE=2 SV=1;sp|Q6PEB6|PHOCN_MOUSE MOB-like protein phocein OS=Mus musculus GN=Mob4 PE=1 SV=1;tr|E0CYJ0|E0	6	3	3	3	18.6	23.513		17531000	1998600	1839600	2477800	1503100	1906000	2422000	1855000	1847900	1680700
E0CY74;E9Q3M7;E0CXL1;Q8BS13;E9PV05;E9Q422;Q6NSQ5;E0CXN9;Q3TQS4;Q3KNJ6;Q8C898;Q3TZR7	tr|E0CY74|E0CY74_MOUSE RIKEN cDNA C130026I21 gene OS=Mus musculus GN=C130026I21Rik PE=4 SV=1;tr|E9Q3M7|E9Q3M7_MOUSE RIKEN cDNA A530032D15Rik gene (Fragment) OS=Mus musculus GN=A530032D15Rik PE=4 SV=1;tr|E0CXL1|E0CXL1_MOUSE RIKEN cDNA C130026I21 gene OS=Mus	12	2	2	1	16.8	14.085		21196000	2059200	3047800	2100600	1885900	2145700	3078200	2478900	2206100	2193200
Q3U0B0;Q3UPV6;E0CXZ9;P62482;Q3U7L1;E0CXI4	tr|Q3U0B0|Q3U0B0_MOUSE Uncharacterized protein (Fragment) OS=Mus musculus GN=Kcnab2 PE=2 SV=1;tr|Q3UPV6|Q3UPV6_MOUSE Voltage-gated potassium channel subunit beta-2 OS=Mus musculus GN=Kcnab2 PE=1 SV=1;tr|E0CXZ9|E0CXZ9_MOUSE Voltage-gated potassium channel s	6	5	5	5	22.2	38.53		36125000	4162200	2594700	677520	5211700	3491200	10325000	4604200	4176400	882620
Q6P6I8;E0CYM8;Q2M4I8;P97797	tr|Q6P6I8|Q6P6I8_MOUSE Signal-regulatory protein alpha OS=Mus musculus GN=Sirpa PE=1 SV=1;tr|E0CYM8|E0CYM8_MOUSE Tyrosine-protein phosphatase non-receptor type substrate 1 OS=Mus musculus GN=Sirpa PE=1 SV=1;tr|Q2M4I8|Q2M4I8_MOUSE Ptpns1 OS=Mus musculus GN=	4	4	4	4	9.6	55.986		32247000	4189700	5273100	3769700	603760	1540800	3008600	4641700	3129600	6090100
E0CYQ2;Q9CQ48	tr|E0CYQ2|E0CYQ2_MOUSE NudC domain-containing protein 2 OS=Mus musculus GN=Nudcd2 PE=1 SV=1;sp|Q9CQ48|NUDC2_MOUSE NudC domain-containing protein 2 OS=Mus musculus GN=Nudcd2 PE=1 SV=1	2	1	1	1	8.3	14.729		22173000	2254300	4059600	3142000	1826300	2613400	3031600	1996900	0	3249300
Q545L9;F7D432;E9PWE0;E0CYV0;P23506;Q8BPI6;F6V9F1;F6TXE3	tr|Q545L9|Q545L9_MOUSE Protein-L-isoaspartate O-methyltransferase OS=Mus musculus GN=Pcmt1 PE=2 SV=1;tr|F7D432|F7D432_MOUSE Protein-L-isoaspartate O-methyltransferase (Fragment) OS=Mus musculus GN=Pcmt1 PE=1 SV=1;tr|E9PWE0|E9PWE0_MOUSE Protein-L-isoasparta	8	4	4	4	26.9	24.634		70126000	4716300	0	0	8063100	15028000	12035000	10430000	10250000	9603300
Q6RUT2;E2FHV9;Q80UR4	tr|Q6RUT2|Q6RUT2_MOUSE Mast cell protease-11 OS=Mus musculus GN=Mcp11 PE=3 SV=1;tr|E2FHV9|E2FHV9_MOUSE Protease serine 34 OS=Mus musculus PE=3 SV=1;tr|Q80UR4|Q80UR4_MOUSE Mast cell protease-11 OS=Mus musculus GN=Prss34 PE=1 SV=1	3	7	7	7	24.5	34.658		115120000	15236000	18331000	12065000	4944100	5509400	6006200	15009000	20477000	17539000
Q3U967;E5Q371;Q61735;D3Z187	tr|Q3U967|Q3U967_MOUSE Uncharacterized protein OS=Mus musculus GN=Cd47 PE=2 SV=1;tr|E5Q371|E5Q371_MOUSE Integrin-associated protein OS=Mus musculus GN=Cd47 PE=2 SV=1;sp|Q61735|CD47_MOUSE Leukocyte surface antigen CD47 OS=Mus musculus GN=Cd47 PE=1 SV=2	4	3	3	3	11.2	33.097		41732000	1609300	2877700	2708100	5039600	5276100	4718900	8308100	7031500	4162600
E9PUA2;Q5BLK4	tr|E9PUA2|E9PUA2_MOUSE Terminal uridylyltransferase 7 OS=Mus musculus GN=Zcchc6 PE=1 SV=1;sp|Q5BLK4|TUT7_MOUSE Terminal uridylyltransferase 7 OS=Mus musculus GN=Zcchc6 PE=1 SV=3	2	3	3	3	2.2	167.15		1705900	175800	229640	332360	84797	129540	119460	323710	124570	185980
E9PUD2;Q8K1M6;Q3U4P3	tr|E9PUD2|E9PUD2_MOUSE Dynamin-1-like protein OS=Mus musculus GN=Dnm1l PE=1 SV=1;sp|Q8K1M6|DNM1L_MOUSE Dynamin-1-like protein OS=Mus musculus GN=Dnm1l PE=1 SV=2;tr|Q3U4P3|Q3U4P3_MOUSE Uncharacterized protein (Fragment) OS=Mus musculus GN=Dnm1l PE=2 SV=1	3	6	6	6	9.4	79.532		13734000	1500500	311670	154310	1517400	1720000	2437100	2198900	1943900	1950600
E9PUF7;Q61210;Q6KAM6;F6ZN61;A0A0U1RPN7;A0A0U1RPP2;A0A0U1RPH2;D3YVJ9	tr|E9PUF7|E9PUF7_MOUSE Rho guanine nucleotide exchange factor 1 OS=Mus musculus GN=Arhgef1 PE=1 SV=1;sp|Q61210|ARHG1_MOUSE Rho guanine nucleotide exchange factor 1 OS=Mus musculus GN=Arhgef1 PE=1 SV=2;tr|Q6KAM6|Q6KAM6_MOUSE MFLJ00369 protein (Fragment) OS=	8	27	27	27	33.9	108.69		136410000	15423000	8582000	9439100	13344000	18404000	22449000	12236000	18234000	18297000
E9PUW7;Q9EPK7	tr|E9PUW7|E9PUW7_MOUSE Exportin-7 OS=Mus musculus GN=Xpo7 PE=1 SV=1;sp|Q9EPK7|XPO7_MOUSE Exportin-7 OS=Mus musculus GN=Xpo7 PE=1 SV=3	2	5	5	5	6.5	123.9		2197400	407280	0	232410	39841	89300	506390	856890	0	65318
E9PV44;O35143	tr|E9PV44|E9PV44_MOUSE ATPase inhibitor, mitochondrial OS=Mus musculus GN=Atpif1 PE=1 SV=1;sp|O35143|ATIF1_MOUSE ATPase inhibitor, mitochondrial OS=Mus musculus GN=Atpif1 PE=1 SV=2	2	2	2	2	12.2	8.7887		209010000	29861000	29800000	15739000	27202000	13742000	28351000	19113000	20290000	24914000
Q80XR8;E9PVA6;J3QK07;D3Z1I2;Q5DU47;Q9JLQ2;F7BIK4;F6U8T2;Q3UGB1;F6WV69;F6SLJ2	tr|Q80XR8|Q80XR8_MOUSE ARF GTPase-activating protein GIT2 OS=Mus musculus GN=Git2 PE=1 SV=2;tr|E9PVA6|E9PVA6_MOUSE ARF GTPase-activating protein GIT2 OS=Mus musculus GN=Git2 PE=1 SV=1;tr|J3QK07|J3QK07_MOUSE ARF GTPase-activating protein GIT2 OS=Mus musculu	11	7	7	7	14.4	75.632		38895000	2528200	3530600	4296100	3992900	3352200	6932100	5352300	4928400	3982100
Q3UHQ5;E9PVA8;Q8CHH7;Q6PGM5;Q640Q4;Q8BIX2;Q3U3Z4;Q8BTM7;Q6NV94	tr|Q3UHQ5|Q3UHQ5_MOUSE Uncharacterized protein OS=Mus musculus GN=Gcn1l1 PE=2 SV=1;sp|E9PVA8|GCN1_MOUSE eIF-2-alpha kinase activator GCN1 OS=Mus musculus GN=Gcn1 PE=1 SV=1;tr|Q8CHH7|Q8CHH7_MOUSE MKIAA0219 protein (Fragment) OS=Mus musculus GN=Gcn1l1 PE=2 S	9	20	20	20	10.7	292.99		8305700	520790	777500	571330	1027100	796670	971380	1420700	914060	1306200
E9PVC6;E9Q9E1;E9PVC5;Q6NZJ6;A0A0J9YUS5;A0A0J9YVC1;A0A0J9YUC1;Q3UZD9;E9Q770;Q3UQI5;Q3UYM6;Q3UTK0;A0PJB5;Q6PD42;Q8K0J8;Q8BUW8;A0A0J9YU44;A0A0J9YUL1;A0A0J9YTV0;D3YWY7;Q6EVH9;D3YWM1;D3Z439;Q8R2V4	tr|E9PVC6|E9PVC6_MOUSE Eukaryotic translation initiation factor 4 gamma 1 OS=Mus musculus GN=Eif4g1 PE=1 SV=1;tr|E9Q9E1|E9Q9E1_MOUSE Eukaryotic translation initiation factor 4 gamma 1 OS=Mus musculus GN=Eif4g1 PE=1 SV=1;tr|E9PVC5|E9PVC5_MOUSE Eukaryotic tr	24	12	12	11	10.8	171.28		16167000	1208700	1603200	1209000	1235800	1574100	2678100	2479200	2571500	1607300
E9PVP3;Q5F2B1;F6XX36;Q8C9V6;Q8R0J2;Q9R0Q9	tr|E9PVP3|E9PVP3_MOUSE Mannose-P-dolichol utilization defect 1 protein OS=Mus musculus GN=Mpdu1 PE=1 SV=1;tr|Q5F2B1|Q5F2B1_MOUSE Mannose-P-dolichol utilization defect 1 protein (Fragment) OS=Mus musculus GN=Mpdu1 PE=1 SV=8;tr|F6XX36|F6XX36_MOUSE Mannose-P-	6	1	1	1	9.2	12.838		33428000	2395300	0	0	3947700	5115900	5556700	6201000	4799200	5412600
E9PVX6;A0A1B0GQV9	sp|E9PVX6|KI67_MOUSE Proliferation marker protein Ki-67 OS=Mus musculus GN=Mki67 PE=1 SV=1	2	40	40	40	17.1	350.86		61067000	6042400	8617100	6390300	5223300	4354400	8539300	7709700	6878900	7311900
Q3TF41;Q8BSH9;E9PW66;P28656;Q9CSP8	tr|Q3TF41|Q3TF41_MOUSE Nucleosome assembly protein 1-like 1 OS=Mus musculus GN=Nap1l1 PE=1 SV=1;tr|Q8BSH9|Q8BSH9_MOUSE Nucleosome assembly protein 1-like 1 OS=Mus musculus GN=Nap1l1 PE=1 SV=1;tr|E9PW66|E9PW66_MOUSE Nucleosome assembly protein 1-like 1 OS=M	5	3	2	2	10.3	42.732		112970000	10434000	9635700	3403400	12607000	14993000	9920500	15797000	17388000	18788000
E9PWE9;Q3UPF7;P48025;Q6P1E0;Q3V3Q2;B7ZN83;P43404;Q8BZ25	tr|E9PWE9|E9PWE9_MOUSE Tyrosine-protein kinase OS=Mus musculus GN=Syk PE=1 SV=1;tr|Q3UPF7|Q3UPF7_MOUSE Tyrosine-protein kinase OS=Mus musculus GN=Syk PE=1 SV=1;sp|P48025|KSYK_MOUSE Tyrosine-protein kinase SYK OS=Mus musculus GN=Syk PE=1 SV=2;tr|Q6P1E0|Q6P1	8	17	17	16	36.7	66.066		433790000	43444000	54404000	55900000	43409000	39258000	50313000	43157000	48188000	55715000
Q8BJI6;E9PY51;E9PWG2;Q69ZT3	tr|Q8BJI6|Q8BJI6_MOUSE Uncharacterized protein OS=Mus musculus GN=Trappc8 PE=2 SV=1;tr|E9PY51|E9PY51_MOUSE Trafficking protein particle complex 8 OS=Mus musculus GN=Trappc8 PE=1 SV=1;tr|E9PWG2|E9PWG2_MOUSE Trafficking protein particle complex 8 OS=Mus musc	4	2	2	2	4	92.937		921900	94423	138720	218880	109830	0	176510	0	0	183540
E9PWG6;B2RQA7	tr|E9PWG6|E9PWG6_MOUSE Non-SMC condensin I complex, subunit G OS=Mus musculus GN=Ncapg PE=1 SV=1;tr|B2RQA7|B2RQA7_MOUSE Ncapg protein OS=Mus musculus GN=Ncapg PE=2 SV=1	2	5	5	5	6.9	112.87		5544500	152230	366090	742720	391290	830640	766530	847570	0	1447500
E9PWV3;Q3TIM6;Q505N6;F6RQA2;F6Q8A4;Q810V8;P18653;Q3UFZ5;G3UZI3;Q810Z3;B2GVN8;A2CEE8;Q3V226;B1B0X1;A2CEE6;A2CEE5;E9PUP0;A2CEE7;E9QK39;Q7TPS0	tr|E9PWV3|E9PWV3_MOUSE Ribosomal protein S6 kinase OS=Mus musculus GN=Rps6ka1 PE=1 SV=1;tr|Q3TIM6|Q3TIM6_MOUSE Ribosomal protein S6 kinase OS=Mus musculus GN=Rps6ka1 PE=2 SV=1;tr|Q505N6|Q505N6_MOUSE Ribosomal protein S6 kinase OS=Mus musculus GN=Rps6ka1 PE	20	17	17	14	33	81.311		92078000	7973100	7045100	9173700	8498600	9316300	12452000	11888000	11377000	14355000
E9PX59;Q69Z37;Q8C059;Q6PIQ3;Q8BZG4;V9GX63;Q9WVE3	tr|E9PX59|E9PX59_MOUSE Sterile alpha motif domain-containing protein 9-like OS=Mus musculus GN=Samd9l PE=1 SV=1;sp|Q69Z37|SAM9L_MOUSE Sterile alpha motif domain-containing protein 9-like OS=Mus musculus GN=Samd9l PE=1 SV=2;tr|Q8C059|Q8C059_MOUSE Uncharacte	7	8	8	8	6	182.25		3538100	198550	137440	181070	454560	749450	628300	329190	376680	482860
G3X9H8;Q641N8;Q3TQK9;E9PXB7;Q8CFI0	tr|G3X9H8|G3X9H8_MOUSE E3 ubiquitin-protein ligase OS=Mus musculus GN=Nedd4l PE=1 SV=1;tr|Q641N8|Q641N8_MOUSE Nedd4l protein (Fragment) OS=Mus musculus GN=Nedd4l PE=2 SV=1;tr|Q3TQK9|Q3TQK9_MOUSE Uncharacterized protein (Fragment) OS=Mus musculus GN=Nedd4l	5	1	1	1	1.8	98.454		206560	0	0	206560	0	0	0	0	0	0
E9PYH2;Q91V12	tr|E9PYH2|E9PYH2_MOUSE Cytosolic acyl coenzyme A thioester hydrolase OS=Mus musculus GN=Acot7 PE=1 SV=1;sp|Q91V12|BACH_MOUSE Cytosolic acyl coenzyme A thioester hydrolase OS=Mus musculus GN=Acot7 PE=1 SV=2	2	3	3	3	9.9	42.826		25574000	1429800	1191800	1364300	2720100	3454300	3812300	5933800	3270100	2397400
E9PYI8;Q9JMA1;Q80UN0;Q3TC32	tr|E9PYI8|E9PYI8_MOUSE Ubiquitin carboxyl-terminal hydrolase 14 OS=Mus musculus GN=Usp14 PE=1 SV=1;sp|Q9JMA1|UBP14_MOUSE Ubiquitin carboxyl-terminal hydrolase 14 OS=Mus musculus GN=Usp14 PE=1 SV=3;tr|Q80UN0|Q80UN0_MOUSE Ubiquitin specific peptidase 14 OS=M	4	12	12	12	29.7	52.318		55765000	4066400	4678500	3520600	7687900	6367800	8451400	7241500	6736600	7014200
E9PYL9;Q9CXW4;Q8VC94;E9PZB3;A2BH06	tr|E9PYL9|E9PYL9_MOUSE Predicted gene 10036 OS=Mus musculus GN=Gm10036 PE=3 SV=1;sp|Q9CXW4|RL11_MOUSE 60S ribosomal protein L11 OS=Mus musculus GN=Rpl11 PE=1 SV=4;tr|Q8VC94|Q8VC94_MOUSE Rpl11 protein OS=Mus musculus GN=Rpl11 PE=2 SV=1;tr|E9PZB3|E9PZB3_MOUS	5	5	5	5	28.7	20.266		799820000	72437000	110220000	118670000	67513000	50521000	89399000	102870000	82147000	106050000
E9PYT3;Q91YH5	tr|E9PYT3|E9PYT3_MOUSE Atlastin-3 OS=Mus musculus GN=Atl3 PE=1 SV=1;sp|Q91YH5|ATLA3_MOUSE Atlastin-3 OS=Mus musculus GN=Atl3 PE=1 SV=1	2	4	4	4	13.4	60.231		16004000	1660800	0	0	1707900	2355100	2886500	1822300	2369500	3202000
Q3TTE1;Q3V0L4;Q3TTX8;Q3TPK8;E9PZ21;Q91W59	tr|Q3TTE1|Q3TTE1_MOUSE Uncharacterized protein OS=Mus musculus GN=Rbms1 PE=2 SV=1;tr|Q3V0L4|Q3V0L4_MOUSE Uncharacterized protein OS=Mus musculus GN=Rbms1 PE=2 SV=1;tr|Q3TTX8|Q3TTX8_MOUSE Uncharacterized protein OS=Mus musculus GN=Rbms1 PE=2 SV=1;tr|Q3TPK8|	6	1	1	1	6.9	23.487		28257000	3733900	5451100	5951700	3410300	3830100	0	0	5879900	0
E9PZF0;B0LAA8;Q5NC82;Q01768;Q8R4B4	tr|E9PZF0|E9PZF0_MOUSE Nucleoside diphosphate kinase OS=Mus musculus GN=Gm20390 PE=3 SV=1;tr|B0LAA8|B0LAA8_MOUSE Nucleoside diphosphate kinase (Fragment) OS=Mus musculus GN=Nme2 PE=2 SV=1;tr|Q5NC82|Q5NC82_MOUSE Nucleoside diphosphate kinase OS=Mus musculus	5	10	10	3	53.6	30.2		659820000	54628000	40675000	44243000	71380000	81788000	103570000	83506000	88613000	91417000
E9Q5H2;E9PZF5;Q3TX26;P97822;E9Q0X5	tr|E9Q5H2|E9Q5H2_MOUSE Acidic leucine-rich nuclear phosphoprotein 32 family member E (Fragment) OS=Mus musculus GN=Anp32e PE=1 SV=1;tr|E9PZF5|E9PZF5_MOUSE Acidic leucine-rich nuclear phosphoprotein 32 family member E (Fragment) OS=Mus musculus GN=Anp32e PE	5	4	4	4	40.2	12.078		579020000	75869000	47953000	48304000	39421000	51770000	78301000	67511000	61658000	108230000
E9Q035;P47758;Q542X6;Q921I1;A0A1W2P830;E9Q2Q7	tr|E9Q035|E9Q035_MOUSE Predicted gene 20425 OS=Mus musculus GN=Gm20425 PE=4 SV=1;sp|P47758|SRPRB_MOUSE Signal recognition particle receptor subunit beta OS=Mus musculus GN=Srprb PE=1 SV=1;tr|Q542X6|Q542X6_MOUSE Uncharacterized protein OS=Mus musculus GN=Sr	6	7	7	6	8.9	107.8		81929000	11945000	7340300	9395500	1128400	551930	2912400	16510000	18986000	13160000
F7B276;Q3V1J8;E9Q092;E9QM92;Q8K0D2	tr|F7B276|F7B276_MOUSE Hyaluronan-binding protein 2 (Fragment) OS=Mus musculus GN=Habp2 PE=1 SV=1;tr|Q3V1J8|Q3V1J8_MOUSE Hyaluronan-binding protein 2 OS=Mus musculus GN=Habp2 PE=1 SV=1;tr|E9Q092|E9Q092_MOUSE Hyaluronan-binding protein 2 OS=Mus musculus GN=	5	1	1	1	4.1	24.514		240980000	35461000	38912000	22440000	23850000	18063000	27748000	19304000	28719000	26480000
Q3TCJ7;F6TVP2;E9Q0K6;F8WJE0;Q60710;Q8C5C0;E9PYG9;Q3UDX7;Q6ZQM3;Q3U754;Q3UBG9;E0CXZ5	tr|Q3TCJ7|Q3TCJ7_MOUSE Uncharacterized protein OS=Mus musculus GN=Samhd1 PE=2 SV=1;tr|F6TVP2|F6TVP2_MOUSE Deoxynucleoside triphosphate triphosphohydrolase SAMHD1 (Fragment) OS=Mus musculus GN=Samhd1 PE=1 SV=1;tr|E9Q0K6|E9Q0K6_MOUSE Deoxynucleoside triphosp	12	12	12	12	21.3	71.763		129060000	14779000	13065000	10379000	13258000	11367000	19186000	15106000	14967000	16956000
E9Q0U7;Q61699;D3Z027;D3Z3I9	tr|E9Q0U7|E9Q0U7_MOUSE Heat shock protein 105 kDa OS=Mus musculus GN=Hsph1 PE=1 SV=1;sp|Q61699|HS105_MOUSE Heat shock protein 105 kDa OS=Mus musculus GN=Hsph1 PE=1 SV=2	4	4	3	3	7	91.677		8532400	211880	441700	460130	1027100	1283500	1004200	1470700	1563800	1069300
E9Q0V6;B1AXH1	tr|E9Q0V6|E9Q0V6_MOUSE NHS-like protein 2 OS=Mus musculus GN=Nhsl2 PE=1 SV=1;sp|B1AXH1|NHSL2_MOUSE NHS-like protein 2 OS=Mus musculus GN=Nhsl2 PE=1 SV=1	2	2	2	2	2	132.35		51620000	183620	3128000	2759300	97606	18128000	12944000	263840	13789000	326370
E9Q197;Q9CPV4;F6ZTG3;Q7TMP4	tr|E9Q197|E9Q197_MOUSE Glyoxalase domain-containing protein 4 OS=Mus musculus GN=Glod4 PE=1 SV=1;sp|Q9CPV4|GLOD4_MOUSE Glyoxalase domain-containing protein 4 OS=Mus musculus GN=Glod4 PE=1 SV=1;tr|F6ZTG3|F6ZTG3_MOUSE Glyoxalase domain-containing protein 4 (	4	6	6	6	26.5	31.207		81280000	5713400	3811400	9124400	9295400	8330500	13940000	10035000	8890500	12139000
Q8C2A3;Q3UNN1;E9Q9F5;E9Q1G8;O55131;Q5DTS3;Q8C752;Q3UGE0;A0A0R4J233;S4R2P6;A0A1W2P6J7;Q9DA97;Q8C650	tr|Q8C2A3|Q8C2A3_MOUSE Uncharacterized protein OS=Mus musculus GN=Sept7 PE=2 SV=1;tr|Q3UNN1|Q3UNN1_MOUSE Uncharacterized protein OS=Mus musculus GN=Sept7 PE=2 SV=1;tr|E9Q9F5|E9Q9F5_MOUSE Septin-7 OS=Mus musculus GN=Sept7 PE=1 SV=2;tr|E9Q1G8|E9Q1G8_MOUSE Se	13	9	9	9	25.6	48.754		147920000	18262000	16522000	12762000	13598000	11672000	21751000	16228000	18493000	18633000
E9Q1P8;Q8K3X4	sp|E9Q1P8|I2BP2_MOUSE Interferon regulatory factor 2-binding protein 2 OS=Mus musculus GN=Irf2bp2 PE=1 SV=1	2	6	6	6	19.1	59.291		46083000	5707400	3266500	5888000	3052100	4119000	5913700	6047800	4588600	7499600
E9Q1S3;Q8C1E4;Q01405	tr|E9Q1S3|E9Q1S3_MOUSE Protein transport protein Sec23A OS=Mus musculus GN=Sec23a PE=1 SV=1;tr|Q8C1E4|Q8C1E4_MOUSE Uncharacterized protein OS=Mus musculus GN=Sec23a PE=2 SV=1;sp|Q01405|SC23A_MOUSE Protein transport protein Sec23A OS=Mus musculus GN=Sec23a	3	6	4	4	12.5	82.955		7119800	579460	0	81282	6459100	0	0	0	0	0
Q3TAW3;E9Q296;Q8C178;Q9EPL9;A0A0J9YVH1	tr|Q3TAW3|Q3TAW3_MOUSE Acyl-coenzyme A oxidase OS=Mus musculus GN=Acox3 PE=1 SV=1;tr|E9Q296|E9Q296_MOUSE Acyl-coenzyme A oxidase OS=Mus musculus GN=Acox3 PE=1 SV=2;tr|Q8C178|Q8C178_MOUSE Acyl-coenzyme A oxidase OS=Mus musculus GN=Acox3 PE=1 SV=1;sp|Q9EPL9|	5	3	3	3	6.7	75.359		1789100	58108	0	0	650620	329570	365090	0	385700	0
Q8C2G0;E9Q2A6;Q3UDE9;K7QD41;Q9QVP9;F7CCX1;Q8C6R5;Q8C9L4	tr|Q8C2G0|Q8C2G0_MOUSE Uncharacterized protein OS=Mus musculus GN=Ptk2b PE=2 SV=1;tr|E9Q2A6|E9Q2A6_MOUSE Protein-tyrosine kinase 2-beta OS=Mus musculus GN=Ptk2b PE=1 SV=1;tr|Q3UDE9|Q3UDE9_MOUSE Protein-tyrosine kinase 2-beta OS=Mus musculus GN=Ptk2b PE=1 S	8	8	8	8	10.2	111.13		11030000	1041800	775540	1285900	793360	1273200	1040100	2299900	1329700	1190600
E9Q2B2;Q5PRE9;Q5RIM6;Q60974;Q8BK32;Q05CF0;Q05C35;Q5RIN0;E9Q8K6;Q3UV34;F7C134;Q8VDE8;E9Q9Y2;Q8CHB6	tr|E9Q2B2|E9Q2B2_MOUSE Nuclear receptor corepressor 1 OS=Mus musculus GN=Ncor1 PE=1 SV=1;tr|Q5PRE9|Q5PRE9_MOUSE Ncor1 protein OS=Mus musculus GN=Ncor1 PE=2 SV=1;tr|Q5RIM6|Q5RIM6_MOUSE Nuclear receptor co-repressor 1, isoform CRA_a OS=Mus musculus GN=Ncor1	14	3	3	3	1.6	264.04		3675300	1061100	0	162250	1266100	133160	0	993340	0	59285
E9Q2M9;E9PV60;Q3U2N8;Q69ZF2	tr|E9Q2M9|E9Q2M9_MOUSE WD repeat and FYVE domain-containing 4 OS=Mus musculus GN=Wdfy4 PE=1 SV=1;tr|E9PV60|E9PV60_MOUSE WD repeat and FYVE domain-containing 4 OS=Mus musculus GN=Wdfy4 PE=1 SV=1	4	5	5	5	1.8	350.92		1204400	232930	145100	161850	103710	113390	102880	159440	0	185060
Q6P7V9;E9Q2X6;Q8CG47;Q3UR81;Q3UZJ7;A0A0A6YXY3;Q3U763	tr|Q6P7V9|Q6P7V9_MOUSE Structural maintenance of chromosomes protein OS=Mus musculus GN=Smc4 PE=2 SV=1;tr|E9Q2X6|E9Q2X6_MOUSE Structural maintenance of chromosomes protein OS=Mus musculus GN=Smc4 PE=1 SV=1;sp|Q8CG47|SMC4_MOUSE Structural maintenance of chr	7	13	13	13	10.9	139.52		38774000	3926000	5687300	3727600	4121400	2556100	4538000	3367600	5796400	5053200
Q4FZH3;E9Q317;O55128;D3YY73;D3Z2N9;D3YY55	tr|Q4FZH3|Q4FZH3_MOUSE MCG49778 OS=Mus musculus GN=Sap18 PE=2 SV=1;tr|E9Q317|E9Q317_MOUSE Histone deacetylase complex subunit SAP18 OS=Mus musculus GN=Sap18b PE=1 SV=1;sp|O55128|SAP18_MOUSE Histone deacetylase complex subunit SAP18 OS=Mus musculus GN=Sap18	6	3	3	3	17.6	17.595		118450000	14212000	17507000	20679000	11217000	7311400	12723000	10915000	10748000	13142000
Q80WR0;E9Q3G8;Q8BRF6;Q80UN3	tr|Q80WR0|Q80WR0_MOUSE Nucleoporin 153 OS=Mus musculus GN=Nup153 PE=2 SV=1;tr|E9Q3G8|E9Q3G8_MOUSE Nucleoporin 153 OS=Mus musculus GN=Nup153 PE=1 SV=1	4	5	5	5	5	152.07		6970800	663920	678430	1217300	344660	576380	835100	1049800	513240	1091900
Q3TTE3;E9Q3U1;Q3V2N4;P62257	tr|Q3TTE3|Q3TTE3_MOUSE Uncharacterized protein OS=Mus musculus GN=Ube2h PE=2 SV=1;tr|E9Q3U1|E9Q3U1_MOUSE Ubiquitin-conjugating enzyme E2 H OS=Mus musculus GN=Ube2h PE=1 SV=1;tr|Q3V2N4|Q3V2N4_MOUSE Uncharacterized protein OS=Mus musculus GN=Ube2h PE=1 SV=1;	4	1	1	1	9.9	17.188		20283000	2139000	1109100	926260	3194200	3603200	5540000	0	3771200	0
E9Q3V6;P42208;F6WYM0;D3YYB1;D3Z3C0;F6UKN5;D3Z1S1;D3YV76;D3YZU7	tr|E9Q3V6|E9Q3V6_MOUSE Septin-2 OS=Mus musculus GN=Sept2 PE=1 SV=1;sp|P42208|SEPT2_MOUSE Septin-2 OS=Mus musculus GN=Sept2 PE=1 SV=2;tr|F6WYM0|F6WYM0_MOUSE Septin-2 (Fragment) OS=Mus musculus GN=Sept2 PE=1 SV=2;tr|D3YYB1|D3YYB1_MOUSE Septin-2 (Fragment) OS	9	4	4	4	16.8	36.978		37398000	4120600	4961100	9551500	2175800	3692000	3473100	3781100	2650300	2992800
E9Q3W4;Q6S390;Q6S388;Q6S392;Q6S393;Q6S387;Q6S385;Q9QXS1;F6R059;A0A0R4J218;E9PW24;A0A0R4J223;Q05CR3;Q8C8S5;E9Q9J6;A0A0R4J221;Q499F9;Q3V3W8	tr|E9Q3W4|E9Q3W4_MOUSE Plectin OS=Mus musculus GN=Plec PE=1 SV=1;tr|Q6S390|Q6S390_MOUSE Plectin 4 OS=Mus musculus GN=Plec PE=2 SV=1;tr|Q6S388|Q6S388_MOUSE Plectin 7 OS=Mus musculus GN=Plec PE=2 SV=1;tr|Q6S392|Q6S392_MOUSE Plectin 3 OS=Mus musculus GN=Plec	18	55	55	54	15.2	499.1		22190000	2175200	2135400	2404900	2207400	2065100	2548000	2496200	2959500	3198400
Q8C2S9;Q3THX5;E9Q3X0;Q9EQK5;Q3U7S9;D3Z2N7	tr|Q8C2S9|Q8C2S9_MOUSE Uncharacterized protein OS=Mus musculus GN=Mvp PE=2 SV=1;tr|Q3THX5|Q3THX5_MOUSE Uncharacterized protein OS=Mus musculus GN=Mvp PE=2 SV=1;tr|E9Q3X0|E9Q3X0_MOUSE Major vault protein OS=Mus musculus GN=Mvp PE=1 SV=1;sp|Q9EQK5|MVP_MOUSE	6	3	3	3	5.4	96.828		6388700	797840	210350	314200	585670	675710	985280	1038400	797970	983250
E9Q481;Q6P2K6	tr|E9Q481|E9Q481_MOUSE Serine/threonine-protein phosphatase 4 regulatory subunit 3A OS=Mus musculus GN=Ppp4r3a PE=1 SV=1;sp|Q6P2K6|P4R3A_MOUSE Serine/threonine-protein phosphatase 4 regulatory subunit 3A OS=Mus musculus GN=Ppp4r3a PE=1 SV=1	2	3	3	3	4.8	95.313		1797000	149170	0	262510	201470	185020	246840	282960	203180	265800
E9Q4B9;E9Q827;P56212;E9PXD7;P60840	tr|E9Q4B9|E9Q4B9_MOUSE cAMP-regulated phosphoprotein 19 OS=Mus musculus GN=Arpp19 PE=1 SV=1;tr|E9Q827|E9Q827_MOUSE cAMP-regulated phosphoprotein 19 OS=Mus musculus GN=Arpp19 PE=1 SV=1;sp|P56212|ARP19_MOUSE cAMP-regulated phosphoprotein 19 OS=Mus musculus G	5	2	2	2	26.8	7.6566		205140000	22460000	49437000	38842000	4932300	5047000	35707000	4996900	4614500	39107000
E9Q4M2;P54310;Q9CTW2	tr|E9Q4M2|E9Q4M2_MOUSE Hormone-sensitive lipase OS=Mus musculus GN=Lipe PE=1 SV=1;sp|P54310|LIPS_MOUSE Hormone-sensitive lipase OS=Mus musculus GN=Lipe PE=1 SV=2;tr|Q9CTW2|Q9CTW2_MOUSE Uncharacterized protein (Fragment) OS=Mus musculus GN=Lipe PE=2 SV=1	3	4	4	4	4.8	117.28		1395600	157520	222460	167380	0	0	0	438010	178440	231780
E9Q4Q8;E9Q8R1;Q6P0X1;E9Q6U4;Q3UWL8	tr|E9Q4Q8|E9Q4Q8_MOUSE Prefoldin 4 (Fragment) OS=Mus musculus GN=Pfdn4 PE=1 SV=1;tr|E9Q8R1|E9Q8R1_MOUSE Prefoldin 4 (Fragment) OS=Mus musculus GN=Pfdn4 PE=1 SV=1;tr|Q6P0X1|Q6P0X1_MOUSE Prefoldin 4 OS=Mus musculus GN=Pfdn4 PE=1 SV=1;tr|E9Q6U4|E9Q6U4_MOUSE P	5	1	1	1	25.5	5.43		89962000	7149200	0	0	0	13430000	22008000	13713000	16526000	17136000
E9Q4T8;Q6ZQ84;Q9JLV5	tr|E9Q4T8|E9Q4T8_MOUSE Cullin-3 OS=Mus musculus GN=Cul3 PE=1 SV=1;tr|Q6ZQ84|Q6ZQ84_MOUSE MKIAA0617 protein (Fragment) OS=Mus musculus GN=mKIAA0617 PE=3 SV=1;sp|Q9JLV5|CUL3_MOUSE Cullin-3 OS=Mus musculus GN=Cul3 PE=1 SV=1	3	4	4	4	7.4	81.11		7074100	0	495460	713420	960980	1063200	981580	196340	1252100	1411000
E9Q5B5;O08528;E9Q9M6	tr|E9Q5B5|E9Q5B5_MOUSE Hexokinase-2 OS=Mus musculus GN=Hk2 PE=1 SV=1;sp|O08528|HXK2_MOUSE Hexokinase-2 OS=Mus musculus GN=Hk2 PE=1 SV=1	3	14	12	9	18.8	99.213		42150000	4637700	2271400	4018000	4245300	5661700	5867100	5571800	4620000	5256800
E9Q5C9	sp|E9Q5C9|NOLC1_MOUSE Nucleolar and coiled-body phosphoprotein 1 OS=Mus musculus GN=Nolc1 PE=1 SV=1	1	3	3	3	5.3	73.697		22244000	1736600	2116500	3163200	1617200	2175600	2569100	3176000	2382900	3306600
E9Q5D6;P69566	tr|E9Q5D6|E9Q5D6_MOUSE Ran-binding protein 9 OS=Mus musculus GN=Ranbp9 PE=1 SV=1;sp|P69566|RANB9_MOUSE Ran-binding protein 9 OS=Mus musculus GN=Ranbp9 PE=1 SV=1	2	2	2	2	3.2	75.767		3308700	448900	0	0	715670	206890	312690	730520	585660	308410
E9Q5F4;G3UZ07;A1E281;E9Q606;E9Q2D1;F6WX90;Q7M0E4;Q8CF71;V9GXQ2;A0A0U1RQ96	tr|E9Q5F4|E9Q5F4_MOUSE Actin, cytoplasmic 1 (Fragment) OS=Mus musculus GN=Actb PE=1 SV=1;tr|G3UZ07|G3UZ07_MOUSE Actin, cytoplasmic 2 (Fragment) OS=Mus musculus GN=Actg1 PE=1 SV=1;tr|A1E281|A1E281_MOUSE Beta-actin (Fragment) OS=Mus musculus GN=Actb PE=2 SV=	10	16	1	1	72.5	29.442		36396000	0	10729000	4482600	0	0	0	9761500	0	11423000
Q8K0Z5;E9Q5J9	tr|Q8K0Z5|Q8K0Z5_MOUSE Tropomyosin 3, gamma OS=Mus musculus GN=Tpm3 PE=2 SV=1;tr|E9Q5J9|E9Q5J9_MOUSE Tropomyosin alpha-3 chain OS=Mus musculus GN=Tpm3 PE=1 SV=1	2	12	1	0	37	33.149		24777000	0	0	24777000	0	0	0	0	0	0
Q3TD86;E9Q604;G5E8F1;Q3U3F0;E9Q5K8;Q3U1U4;Q3TBT0;Q3U4I5;Q3U1W4;A0A0R4J1B4;P05555;Q3UJ88;A1E2I0;D6RJ73	tr|Q3TD86|Q3TD86_MOUSE Uncharacterized protein OS=Mus musculus GN=Itgam PE=2 SV=1;tr|E9Q604|E9Q604_MOUSE Integrin alpha M, isoform CRA_a OS=Mus musculus GN=Itgam PE=1 SV=2;tr|G5E8F1|G5E8F1_MOUSE Integrin alpha-M OS=Mus musculus GN=Itgam PE=1 SV=2;tr|Q3U3F0	14	35	35	35	34.6	127.4		882660000	84187000	63664000	73188000	66178000	64247000	85846000	131870000	134390000	179090000
E9Q616;Q6UL10;A0JLR7;Q61484;A0PJF4;Q3UYW8;Q8BRB8;Q8BKS2	tr|E9Q616|E9Q616_MOUSE AHNAK nucleoprotein (desmoyokin) OS=Mus musculus GN=Ahnak PE=1 SV=1;tr|Q6UL10|Q6UL10_MOUSE AHNAK (Fragment) OS=Mus musculus GN=Ahnak PE=3 SV=1;tr|A0JLR7|A0JLR7_MOUSE Ahnak protein (Fragment) OS=Mus musculus GN=Ahnak PE=2 SV=1	8	16	16	16	13.3	604.25		4982600	453140	164110	453540	689770	169030	1296700	607400	454320	694600
E9Q6R3;O08547;Q3UZ06;A0A0G2JF08	tr|E9Q6R3|E9Q6R3_MOUSE Vesicle-trafficking protein SEC22b OS=Mus musculus GN=Sec22b PE=1 SV=1;sp|O08547|SC22B_MOUSE Vesicle-trafficking protein SEC22b OS=Mus musculus GN=Sec22b PE=1 SV=3;tr|Q3UZ06|Q3UZ06_MOUSE Uncharacterized protein OS=Mus musculus GN=Sec	4	6	6	6	42.8	18.922		108340000	22828000	18850000	11596000	9295200	15907000	9862500	6875700	8182800	4945000
Q5UE59;E9Q7C9;Q7TNF4;Q8CD76;Q99JQ9;Q7M703;Q7M702;Q7M6Z8;Q7M701;Q7M6Z7;Q7M6Z9;Q7M700;D3YXZ3;Q91YS4;Q7M6Z6;O88447;O88448;Q9DBS5	tr|Q5UE59|Q5UE59_MOUSE Kinesin light chain 1 OS=Mus musculus GN=Klc1 PE=1 SV=1;tr|E9Q7C9|E9Q7C9_MOUSE Kinesin light chain 1 OS=Mus musculus GN=Klc1 PE=1 SV=1;tr|Q7TNF4|Q7TNF4_MOUSE Kinesin light chain 1 OS=Mus musculus GN=Klc1 PE=1 SV=1;tr|Q8CD76|Q8CD76_MO	18	2	2	2	4.1	61.629		5367600	397220	643780	854820	238270	383310	1636100	410630	365080	438330
E9Q7G0;A0A1B0GSW3;A0A1B0GT61;F6ZQA3;Q3UNM2;Q3TH77;Q91W16;A0A1B0GT38;A0A1B0GSH2;Q99KG8	sp|E9Q7G0|NUMA1_MOUSE Nuclear mitotic apparatus protein 1 OS=Mus musculus GN=Numa1 PE=1 SV=1;tr|A0A1B0GSW3|A0A1B0GSW3_MOUSE Nuclear mitotic apparatus protein 1 (Fragment) OS=Mus musculus GN=Numa1 PE=1 SV=1	10	37	37	37	23.2	235.63		39719000	3852100	3408600	4448300	3232200	2898000	5894500	4674500	5604100	5707000
G3UYV3;Q564F2;E9Q7K1;Q564G0;Q64520	tr|G3UYV3|G3UYV3_MOUSE Guanylate kinase (Fragment) OS=Mus musculus GN=Guk1 PE=1 SV=1;tr|Q564F2|Q564F2_MOUSE Guanylate kinase 1, isoform CRA_a OS=Mus musculus GN=Guk1 PE=2 SV=1;tr|E9Q7K1|E9Q7K1_MOUSE Guanylate kinase OS=Mus musculus GN=Guk1 PE=1 SV=1;tr|Q56	5	1	1	1	38.7	3.1937		20442000	0	0	9416400	5320500	5705200	0	0	0	0
Q3TQL4;Q3TEY5;E9Q800;Q3U7N2;Q8CAQ8;E9QAY6;A0A0U1RP81;Q3TVZ5;A0A1B0GX08;Q3TZK4;Q2YDW0;E9PVS5;A6H604;A0A0U1RQ14;Q6P8Y5	tr|Q3TQL4|Q3TQL4_MOUSE MICOS complex subunit MIC60 (Fragment) OS=Mus musculus GN=Immt PE=2 SV=1;tr|Q3TEY5|Q3TEY5_MOUSE MICOS complex subunit MIC60 OS=Mus musculus GN=Immt PE=2 SV=1;tr|E9Q800|E9Q800_MOUSE MICOS complex subunit MIC60 OS=Mus musculus GN=Immt	15	6	6	6	12.5	75.472		16321000	1877900	1499900	1753500	2076200	1320000	1665800	2103800	1581700	2442700
E9Q8K8;Q6ZPZ3;Q6PAI8;A0A1B0GRU3	tr|E9Q8K8|E9Q8K8_MOUSE Zinc finger CCCH domain-containing protein 4 OS=Mus musculus GN=Zc3h4 PE=1 SV=1;sp|Q6ZPZ3|ZC3H4_MOUSE Zinc finger CCCH domain-containing protein 4 OS=Mus musculus GN=Zc3h4 PE=1 SV=2;tr|Q6PAI8|Q6PAI8_MOUSE Zc3h4 protein OS=Mus musculu	4	3	3	3	4.6	136.02		2510900	0	0	183180	306850	368940	413120	229480	327550	681740
E9Q8L9;Q9D620;Q6KAN5;A0A1B0GRJ0;G3UW57;Q3U366;G3XA57	tr|E9Q8L9|E9Q8L9_MOUSE Rab11 family-interacting protein 1 OS=Mus musculus GN=Rab11fip1 PE=1 SV=1;sp|Q9D620|RFIP1_MOUSE Rab11 family-interacting protein 1 OS=Mus musculus GN=Rab11fip1 PE=1 SV=2;tr|Q6KAN5|Q6KAN5_MOUSE MFLJ00294 protein (Fragment) OS=Mus musc	7	3	3	3	3.9	125.02		2910800	349960	0	0	474100	226710	378250	663710	241980	576050
G3X9J6;E9Q9M1;Q3V1L4	tr|G3X9J6|G3X9J6_MOUSE 5-nucleotidase, cytosolic II, isoform CRA_b OS=Mus musculus GN=Nt5c2 PE=1 SV=1;tr|E9Q9M1|E9Q9M1_MOUSE Cytosolic purine 5-nucleotidase OS=Mus musculus GN=Nt5c2 PE=1 SV=1;sp|Q3V1L4|5NTC_MOUSE Cytosolic purine 5-nucleotidase OS=Mus m	3	4	4	4	8	67.764		27397000	3146600	1355800	1501100	2357100	2817400	5240800	4074600	2870400	4032900
E9QAJ9;Q3UIA2;A0A0U1RNM6;A0A0U1RPK6;Q5SSM3	tr|E9QAJ9|E9QAJ9_MOUSE Rho GTPase-activating protein 17 OS=Mus musculus GN=Arhgap17 PE=1 SV=1;sp|Q3UIA2|RHG17_MOUSE Rho GTPase-activating protein 17 OS=Mus musculus GN=Arhgap17 PE=1 SV=1;tr|A0A0U1RNM6|A0A0U1RNM6_MOUSE Rho GTPase-activating protein 17 OS=Mu	5	5	5	5	7.7	88.924		8351500	457950	758100	440430	1036900	899010	1327000	1404800	971590	1055800
E9QAS4;E9QAS5;Q5DTP7;Q6PDQ2;Q99JM0;Q3U582;Q8BM83;Q3UFM8;F6WR45;E9PYU4;E9PYL1;A2A8L1;F7C528;E9Q614;B1AR17;Q3ULG0;F6V4V3;Q4QQN1	tr|E9QAS4|E9QAS4_MOUSE Chromodomain-helicase-DNA-binding protein 4 OS=Mus musculus GN=Chd4 PE=1 SV=1;tr|E9QAS5|E9QAS5_MOUSE Chromodomain-helicase-DNA-binding protein 4 OS=Mus musculus GN=Chd4 PE=1 SV=1;tr|Q5DTP7|Q5DTP7_MOUSE MKIAA4075 protein (Fragment) OS	18	16	16	16	10	216.37		23623000	1981700	1729500	1721200	2804600	2170200	3587000	3024700	2932000	3672200
Q5M8Q0;E9QAZ2;Q9CZM2;Q3U7D2;B8JKK2	tr|Q5M8Q0|Q5M8Q0_MOUSE Ribosomal protein L15 OS=Mus musculus GN=Rpl15 PE=2 SV=1;tr|E9QAZ2|E9QAZ2_MOUSE Ribosomal protein L15 OS=Mus musculus GN=Gm10020 PE=3 SV=1;sp|Q9CZM2|RL15_MOUSE 60S ribosomal protein L15 OS=Mus musculus GN=Rpl15 PE=2 SV=4;tr|Q3U7D2|Q3	5	13	13	13	48.5	24.146		1039900000	77593000	38694000	27639000	152880000	107060000	196820000	123030000	173000000	143220000
E9QB02;Q68FL6;F6W0G8	tr|E9QB02|E9QB02_MOUSE Methionine--tRNA ligase, cytoplasmic OS=Mus musculus GN=Mars PE=1 SV=1;sp|Q68FL6|SYMC_MOUSE Methionine--tRNA ligase, cytoplasmic OS=Mus musculus GN=Mars PE=1 SV=1	3	7	7	7	10.4	102.37		19121000	1598100	1663100	2069500	1701700	2166800	2824500	2066500	2470500	2560100
Q4VAF0;E9QJT5;P56376	tr|Q4VAF0|Q4VAF0_MOUSE Acylphosphatase (Fragment) OS=Mus musculus GN=Acyp1 PE=2 SV=1;tr|E9QJT5|E9QJT5_MOUSE Acylphosphatase OS=Mus musculus GN=Acyp1 PE=1 SV=1;sp|P56376|ACYP1_MOUSE Acylphosphatase-1 OS=Mus musculus GN=Acyp1 PE=1 SV=2	3	2	2	2	16.4	14.925		58535000	4174700	5411200	8973000	3295700	7473700	9190000	6536100	6650000	6830000
Q53ZD4;E9QJW0;Q91VS7;A0A0N4SVZ0;D3YU60	tr|Q53ZD4|Q53ZD4_MOUSE Microsomal glutathione S-transferase 1 OS=Mus musculus GN=Mgst1 PE=1 SV=1;tr|E9QJW0|E9QJW0_MOUSE Microsomal glutathione S-transferase 1 OS=Mus musculus GN=Mgst1 PE=1 SV=1;sp|Q91VS7|MGST1_MOUSE Microsomal glutathione S-transferase 1 O	5	2	2	2	18.7	17.551		482640000	42642000	49177000	61132000	42846000	46137000	68035000	55286000	55777000	61601000
E9QK48;Q7TNG5;D6RGM3;A0A0U1RQ42	tr|E9QK48|E9QK48_MOUSE Echinoderm microtubule-associated protein-like 2 OS=Mus musculus GN=Eml2 PE=1 SV=1;sp|Q7TNG5|EMAL2_MOUSE Echinoderm microtubule-associated protein-like 2 OS=Mus musculus GN=Eml2 PE=1 SV=1;tr|D6RGM3|D6RGM3_MOUSE Echinoderm microtubule	4	7	7	7	9.8	90.791		73019000	6343100	4709500	6332800	8234900	7127300	12501000	6021200	10581000	11168000
Q4G0B8;E9QKZ2;Q91YE6;E0CY46;E0CXB2;F6UT58	tr|Q4G0B8|Q4G0B8_MOUSE Importin 9 OS=Mus musculus GN=Ipo9 PE=2 SV=1;tr|E9QKZ2|E9QKZ2_MOUSE Importin-9 OS=Mus musculus GN=Ipo9 PE=1 SV=1;sp|Q91YE6|IPO9_MOUSE Importin-9 OS=Mus musculus GN=Ipo9 PE=1 SV=3;tr|E0CY46|E0CY46_MOUSE Importin-9 OS=Mus musculus GN=I	6	4	4	4	6.7	115.89		4432300	206830	468660	492460	429080	518910	619410	841320	282210	573400
F7B6X4;F6V8M6;Q3UX51;F6U2C2;Q3UX07;E9QM77;O70305	tr|F7B6X4|F7B6X4_MOUSE Ataxin-2 (Fragment) OS=Mus musculus GN=Atxn2 PE=1 SV=1;tr|F6V8M6|F6V8M6_MOUSE Ataxin-2 (Fragment) OS=Mus musculus GN=Atxn2 PE=1 SV=2;tr|Q3UX51|Q3UX51_MOUSE Uncharacterized protein (Fragment) OS=Mus musculus GN=Atxn2 PE=2 SV=1;tr|F6U2	7	1	1	1	5.2	35.381		1321800	168430	473870	679530	0	0	0	0	0	0
H3BKD4;Q3UJA5;H3BKE6;E9QMI7;E9QMJ1;H3BL41;H3BJY2;E9QN63;Q9QWY8;Q3TXY1;H3BK40;D3YX85;Q3UH05;Q6A074;Q3UH27;E9PX52;Q7SIG6	tr|H3BKD4|H3BKD4_MOUSE Arf-GAP with SH3 domain, ANK repeat and PH domain-containing protein 1 OS=Mus musculus GN=Asap1 PE=1 SV=1;tr|Q3UJA5|Q3UJA5_MOUSE Uncharacterized protein OS=Mus musculus GN=Asap1 PE=2 SV=1;tr|H3BKE6|H3BKE6_MOUSE Arf-GAP with SH3 domai	17	4	4	4	3.6	120.1		2190800	620580	96892	630200	0	150600	178610	190830	104730	218360
G5E8W1;E9QMQ3;Q3U2M9;Q99KW3	tr|G5E8W1|G5E8W1_MOUSE TRIO and F-actin-binding protein OS=Mus musculus GN=Triobp PE=1 SV=1;tr|E9QMQ3|E9QMQ3_MOUSE TRIO and F-actin-binding protein OS=Mus musculus GN=Triobp PE=1 SV=1;tr|Q3U2M9|Q3U2M9_MOUSE Uncharacterized protein (Fragment) OS=Mus musculu	4	2	2	2	6.9	40.632		3006600	0	1421500	1137800	0	0	0	0	447220	0
E9QMX7;Q640N3	tr|E9QMX7|E9QMX7_MOUSE Rho GTPase-activating protein 30 OS=Mus musculus GN=Arhgap30 PE=1 SV=1;sp|Q640N3|RHG30_MOUSE Rho GTPase-activating protein 30 OS=Mus musculus GN=Arhgap30 PE=1 SV=3	2	4	4	4	4.8	119.44		5524900	478880	224330	166110	812440	938130	1120700	648620	500990	634770
Q5M9K3;E9QNP0;P62984;A5JUZ1;A0A0A6YW67;E9Q9J0;Q8C2K3;E9Q4P0;E9Q5F6;Q922B0;Q5SX22;Q3TH47;Q78XY9;Q8R0Z9;Q922Z8;Q8VC46;P0CG49;P0CG50;B0LAC2;D3YYZ2	tr|Q5M9K3|Q5M9K3_MOUSE MCG23116, isoform CRA_a OS=Mus musculus GN=Uba52 PE=2 SV=1;tr|E9QNP0|E9QNP0_MOUSE KxDL motif-containing protein 1 OS=Mus musculus GN=Kxd1 PE=1 SV=1;sp|P62984|RL40_MOUSE Ubiquitin-60S ribosomal protein L40 OS=Mus musculus GN=Uba52 PE=	20	6	1	1	44.5	14.728		339960000	35865000	0	0	43336000	10052000	14942000	55589000	53179000	127000000
E9QNR6;Q8VD62	tr|E9QNR6|E9QNR6_MOUSE Expressed sequence AI837181 OS=Mus musculus GN=AI837181 PE=1 SV=1;sp|Q8VD62|CK068_MOUSE UPF0696 protein C11orf68 homolog OS=Mus musculus GN=Bles03 PE=1 SV=1	2	1	1	1	4.4	31.845		2543700	0	0	0	436650	613050	0	532280	0	961750
Q3UNQ4;Q3U0K4;E9QNW6;Q8VDG7	tr|Q3UNQ4|Q3UNQ4_MOUSE Platelet-activating factor acetylhydrolase OS=Mus musculus GN=Pafah2 PE=2 SV=1;tr|Q3U0K4|Q3U0K4_MOUSE Platelet-activating factor acetylhydrolase OS=Mus musculus GN=Pafah2 PE=2 SV=1;tr|E9QNW6|E9QNW6_MOUSE Platelet-activating factor ac	4	2	2	2	7.7	43.455		4102000	0	667100	0	899400	559540	1373400	0	602490	0
E9QP46;Q6ZWQ0;Q8K147;D5FT67;Q7TPP1;Q6PI66;F6W8R9;Q76KB5;Q6DFZ2	tr|E9QP46|E9QP46_MOUSE Nesprin-2 OS=Mus musculus GN=Syne2 PE=1 SV=1;sp|Q6ZWQ0|SYNE2_MOUSE Nesprin-2 OS=Mus musculus GN=Syne2 PE=1 SV=2	9	6	6	6	1	782.13		1329600	170660	491690	20416	169950	39899	107020	166260	136780	26900
G5E8Y6;E9QP49;Q99MS7	tr|G5E8Y6|G5E8Y6_MOUSE EH domain-binding protein 1-like protein 1 OS=Mus musculus GN=Ehbp1l1 PE=1 SV=1;tr|E9QP49|E9QP49_MOUSE EH domain-binding protein 1-like protein 1 OS=Mus musculus GN=Ehbp1l1 PE=1 SV=1;sp|Q99MS7|EH1L1_MOUSE EH domain-binding protein 1-	3	2	2	2	3.6	85.461		12316000	629390	236670	372230	2017200	1571600	3855200	1126900	1333500	1173600
E9QPI5;Q6A026;Q8VDS0	tr|E9QPI5|E9QPI5_MOUSE Sister chromatid cohesion protein PDS5 homolog A OS=Mus musculus GN=Pds5a PE=1 SV=1;sp|Q6A026|PDS5A_MOUSE Sister chromatid cohesion protein PDS5 homolog A OS=Mus musculus GN=Pds5a PE=1 SV=3	3	16	16	15	14.2	150.22		19290000	1807600	1445900	2346700	1978600	3321900	3303300	1353500	1757200	1975000
Q9CTT4;Q923F9;E9QPX3;Q9CXZ1	tr|Q9CTT4|Q9CTT4_MOUSE Uncharacterized protein (Fragment) OS=Mus musculus GN=Ndufs4 PE=2 SV=3;tr|Q923F9|Q923F9_MOUSE NADH dehydrogenase (Ubiquinone) Fe-S protein 4 OS=Mus musculus GN=Ndufs4 PE=2 SV=1;tr|E9QPX3|E9QPX3_MOUSE NADH dehydrogenase [ubiquinone] i	4	1	1	1	11.3	14.968		12245000	0	0	0	0	0	0	0	4660100	7584900
E9QQ10;Q70FJ1;A0A140T8S1	tr|E9QQ10|E9QQ10_MOUSE A-kinase anchor protein 9 OS=Mus musculus GN=Akap9 PE=1 SV=1;sp|Q70FJ1|AKAP9_MOUSE A-kinase anchor protein 9 OS=Mus musculus GN=Akap9 PE=1 SV=2;tr|A0A140T8S1|A0A140T8S1_MOUSE A-kinase anchor protein 9 (Fragment) OS=Mus musculus GN=Ak	3	2	2	2	0.5	434.13		1789200	0	0	0	0	0	0	451670	527550	809990
F6QA74;Q544Z7;P28352;D3Z124	tr|F6QA74|F6QA74_MOUSE DNA-(apurinic or apyrimidinic site) lyase (Fragment) OS=Mus musculus GN=Apex1 PE=1 SV=1;tr|Q544Z7|Q544Z7_MOUSE DNA-(apurinic or apyrimidinic site) lyase OS=Mus musculus GN=Apex1 PE=1 SV=1;sp|P28352|APEX1_MOUSE DNA-(apurinic or apyrim	4	5	5	5	26.6	32.318		90726000	8765600	5233200	3784200	8371300	13802000	12072000	10450000	11960000	16287000
F6QFL0;Q91VG6;Q9CRB9	tr|F6QFL0|F6QFL0_MOUSE MICOS complex subunit (Fragment) OS=Mus musculus GN=Chchd3 PE=1 SV=1;tr|Q91VG6|Q91VG6_MOUSE MICOS complex subunit (Fragment) OS=Mus musculus GN=Chchd3 PE=2 SV=1;sp|Q9CRB9|MIC19_MOUSE MICOS complex subunit Mic19 OS=Mus musculus GN=Chc	3	1	1	1	14.6	10.436		18169000	0	0	0	2454900	2558200	3817600	2535700	3212600	3590400
F6QKK2;Q8VEH3	tr|F6QKK2|F6QKK2_MOUSE ADP-ribosylation factor-like protein 8A (Fragment) OS=Mus musculus GN=Arl8a PE=1 SV=1;sp|Q8VEH3|ARL8A_MOUSE ADP-ribosylation factor-like protein 8A OS=Mus musculus GN=Arl8a PE=1 SV=1	2	3	3	1	24.8	18.756		47817000	5999200	4551800	3639600	5945900	4031000	9061900	8251400	6335800	0
F6QL70;Q5M8M8;P47915;A0A1L1SUN1;A0A1L1SS27;F6YH22;W4VSN7	tr|F6QL70|F6QL70_MOUSE 60S ribosomal protein L29 OS=Mus musculus GN=Gm17669 PE=3 SV=1;tr|Q5M8M8|Q5M8M8_MOUSE 60S ribosomal protein L29 OS=Mus musculus GN=Rpl29 PE=1 SV=1;sp|P47915|RL29_MOUSE 60S ribosomal protein L29 OS=Mus musculus GN=Rpl29 PE=1 SV=2;tr|A	7	3	3	3	19.5	16.966		551750000	54660000	53926000	32979000	51688000	21509000	80120000	71712000	92334000	92825000
F6R9G0	tr|F6R9G0|F6R9G0_MOUSE E1A-binding protein p400 (Fragment) OS=Mus musculus GN=Ep400 PE=1 SV=1	1	1	1	1	5.5	34.56		2026600	0	532800	0	0	277600	0	1216200	0	0
Q3TPU3;F6RG68;Q3UQN2	tr|Q3TPU3|Q3TPU3_MOUSE Uncharacterized protein OS=Mus musculus GN=Fcho2 PE=2 SV=1;tr|F6RG68|F6RG68_MOUSE F-BAR domain only protein 2 OS=Mus musculus GN=Fcho2 PE=1 SV=2;sp|Q3UQN2|FCHO2_MOUSE F-BAR domain only protein 2 OS=Mus musculus GN=Fcho2 PE=1 SV=1	3	1	1	1	2.6	57.962		3090900	0	0	0	0	345220	949460	872210	0	924030
F6RJV6;Q9JJK2	tr|F6RJV6|F6RJV6_MOUSE LanC-like protein 2 (Fragment) OS=Mus musculus GN=Lancl2 PE=1 SV=1;sp|Q9JJK2|LANC2_MOUSE LanC-like protein 2 OS=Mus musculus GN=Lancl2 PE=1 SV=1	2	2	2	2	5	49.742		1082200	0	0	0	88392	651050	180610	0	80413	81693
Q05C51;F6RP29;Q9CWY8	tr|Q05C51|Q05C51_MOUSE Ribonuclease OS=Mus musculus GN=Rnaseh2a PE=1 SV=1;tr|F6RP29|F6RP29_MOUSE Ribonuclease OS=Mus musculus GN=Rnaseh2a PE=1 SV=2;sp|Q9CWY8|RNH2A_MOUSE Ribonuclease H2 subunit A OS=Mus musculus GN=Rnaseh2a PE=1 SV=2	3	2	2	2	9.4	28.148		20277000	1675700	3011600	2435800	1136400	1322200	3620800	1388200	3215600	2470900
F6RPB0;Q14B82;Q3U4B8;Q14B83;Q61161	tr|F6RPB0|F6RPB0_MOUSE Mitogen-activated protein kinase kinase kinase kinase 2 (Fragment) OS=Mus musculus GN=Map4k2 PE=1 SV=1;tr|Q14B82|Q14B82_MOUSE Map4k2 protein OS=Mus musculus GN=Map4k2 PE=2 SV=1;tr|Q3U4B8|Q3U4B8_MOUSE Mitogen-activated protein kinase	5	1	1	1	14.8	15.766		2121800	1733700	0	388150	0	0	0	0	0	0
F6RPJ9;Q8CGB9;Q9JHR7;Q8CE37	tr|F6RPJ9|F6RPJ9_MOUSE Insulin-degrading enzyme (Fragment) OS=Mus musculus GN=Ide PE=1 SV=1;tr|Q8CGB9|Q8CGB9_MOUSE Insulin degrading enzyme OS=Mus musculus GN=Ide PE=2 SV=1;sp|Q9JHR7|IDE_MOUSE Insulin-degrading enzyme OS=Mus musculus GN=Ide PE=1 SV=1	4	6	6	6	6.3	114.15		5613100	0	487560	171910	796630	1196600	1204400	551500	688050	516500
F6SPW1;Q8C1X0;Q3UDG9;Q3U7M4;Q3U6W5;Q3TIB3;Q0PM16;Q0PM15;P22366	tr|F6SPW1|F6SPW1_MOUSE Myeloid differentiation primary response protein MyD88 (Fragment) OS=Mus musculus GN=Myd88 PE=1 SV=2;tr|Q8C1X0|Q8C1X0_MOUSE Uncharacterized protein OS=Mus musculus GN=Myd88 PE=2 SV=1;tr|Q3UDG9|Q3UDG9_MOUSE Uncharacterized protein (Fr	9	2	2	2	17.4	11.77		5415900	0	0	0	1274800	0	1834700	0	1188700	1117700
F6T8D7	tr|F6T8D7|F6T8D7_MOUSE Predicted gene 6401 OS=Mus musculus GN=Gm6401 PE=4 SV=2	1	1	1	1	3.4	24.877		101340000	13798000	0	18896000	14132000	0	16432000	17844000	3997100	16241000
F6UTB8;Q66JX5	tr|F6UTB8|F6UTB8_MOUSE FGFR1 oncogene partner (Fragment) OS=Mus musculus GN=Fgfr1op PE=1 SV=1;sp|Q66JX5|FR1OP_MOUSE FGFR1 oncogene partner OS=Mus musculus GN=Fgfr1op PE=1 SV=1	2	1	1	1	11.9	15.854		8502700	0	1721900	2087800	1872000	0	1462500	0	1358500	0
F6V084;Q8VBT0	tr|F6V084|F6V084_MOUSE Thioredoxin-related transmembrane protein 1 (Fragment) OS=Mus musculus GN=Tmx1 PE=1 SV=1;sp|Q8VBT0|TMX1_MOUSE Thioredoxin-related transmembrane protein 1 OS=Mus musculus GN=Tmx1 PE=1 SV=1	2	2	2	2	16.9	14.343		25723000	1081300	0	5143200	2826000	4129700	0	4566700	2541700	5434700
F6Z9R1;F6VCY0;Q3V406;Q9D6J5	tr|F6Z9R1|F6Z9R1_MOUSE Predicted gene 20538 (Fragment) OS=Mus musculus GN=Gm20538 PE=4 SV=1;tr|F6VCY0|F6VCY0_MOUSE NADH dehydrogenase [ubiquinone] 1 beta subcomplex subunit 8, mitochondrial (Fragment) OS=Mus musculus GN=Ndufb8 PE=1 SV=1;tr|Q3V406|Q3V406_MO	4	1	1	1	20	8.6401		11629000	1888400	2724900	2288800	1885500	0	0	0	0	2841700
F6VEI7	tr|F6VEI7|F6VEI7_MOUSE Mitogen-activated protein kinase 1 (Fragment) OS=Mus musculus GN=Mapk1 PE=1 SV=1	1	4	1	1	30.6	15.549		13128000	0	0	0	2552600	3238900	0	0	3358200	3978400
F6VSS8	tr|F6VSS8|F6VSS8_MOUSE Synaptojanin-1 (Fragment) OS=Mus musculus GN=Synj1 PE=1 SV=8	1	1	1	1	11	11.903		61987000	5846600	7438500	8942500	5896800	5398000	5458500	10903000	6997800	5104400
F6W7D6;Q3U327;Q6P203;Q3UKG7;Q9R210	tr|F6W7D6|F6W7D6_MOUSE Transcription factor EB (Fragment) OS=Mus musculus GN=Tfeb PE=1 SV=1;tr|Q3U327|Q3U327_MOUSE Uncharacterized protein OS=Mus musculus GN=Tfeb PE=2 SV=1;tr|Q6P203|Q6P203_MOUSE Transcription factor EB OS=Mus musculus GN=Tfeb PE=2 SV=1;tr	5	1	1	1	6.9	37.001		4626300	0	0	0	1025400	936270	1481000	0	1183500	0
Q3TGD7;Q3TL84;F6WLY0;G5E880;Q3U560;Q60664;Q3TVR1;Q3U583;Q3V325;F6VUK8;Q8BNX8;Q3V3H7;E9Q2C8	tr|Q3TGD7|Q3TGD7_MOUSE Uncharacterized protein OS=Mus musculus GN=Lrmp PE=2 SV=1;tr|Q3TL84|Q3TL84_MOUSE Uncharacterized protein (Fragment) OS=Mus musculus GN=Lrmp PE=2 SV=1;tr|F6WLY0|F6WLY0_MOUSE Lymphoid-restricted membrane protein (Fragment) OS=Mus muscu	13	9	9	9	24.8	49.013		50180000	5839900	5913300	7586600	4738200	3273900	5619900	4907400	6069700	6231200
F7CDT0;F6WMC0;P61082;G5E919;Q8R352	tr|F7CDT0|F7CDT0_MOUSE NEDD8-conjugating enzyme Ubc12 (Fragment) OS=Mus musculus GN=Ube2m PE=1 SV=1;tr|F6WMC0|F6WMC0_MOUSE NEDD8-conjugating enzyme Ubc12 (Fragment) OS=Mus musculus GN=Ube2m PE=1 SV=1;sp|P61082|UBC12_MOUSE NEDD8-conjugating enzyme Ubc12 OS=	5	6	6	6	39.2	19.823		185090000	19672000	9731600	15443000	22431000	23712000	30349000	21667000	24219000	17862000
F6WMJ3;Q8K4I3;A2AFJ8;H3BKQ0;H3BJ53	tr|F6WMJ3|F6WMJ3_MOUSE Rho guanine nucleotide exchange factor 6 OS=Mus musculus GN=Arhgef6 PE=1 SV=1;sp|Q8K4I3|ARHG6_MOUSE Rho guanine nucleotide exchange factor 6 OS=Mus musculus GN=Arhgef6 PE=1 SV=1	5	17	17	14	25	89.811		38678000	2341800	3012600	2299900	3679100	4927900	7125000	4592000	4947100	5752600
Q3UBR4;Q99M14;F6WR04;Q8BSZ5;Q3UD32;O70370	tr|Q3UBR4|Q3UBR4_MOUSE Uncharacterized protein OS=Mus musculus GN=Ctss PE=2 SV=1;tr|Q99M14|Q99M14_MOUSE Ctss protein OS=Mus musculus GN=Ctss PE=2 SV=1;tr|F6WR04|F6WR04_MOUSE Cathepsin S OS=Mus musculus GN=Ctss PE=1 SV=1;tr|Q8BSZ5|Q8BSZ5_MOUSE Cathepsin S O	6	1	1	1	4	36.78		7428100	1313400	0	0	1428800	0	0	0	1585800	3100100
Q3UBA0;Q3ULN5;Q3UKJ3;F6X9I3;P26883	tr|Q3UBA0|Q3UBA0_MOUSE Peptidylprolyl isomerase (Fragment) OS=Mus musculus GN=Fkbp1a PE=2 SV=1;tr|Q3ULN5|Q3ULN5_MOUSE Peptidylprolyl isomerase OS=Mus musculus GN=Fkbp1a PE=2 SV=1;tr|Q3UKJ3|Q3UKJ3_MOUSE Peptidylprolyl isomerase OS=Mus musculus GN=Fkbp1a PE=	5	1	1	1	17.5	8.8761		42106000	4333700	0	1421700	6016000	6480700	10808000	0	13046000	0
Q561N5;F6YVP7;P62270;Q3TW65;A0A1Y7VKY1;S4R1N6	tr|Q561N5|Q561N5_MOUSE MCG23000, isoform CRA_b OS=Mus musculus GN=Rps18 PE=2 SV=1;tr|F6YVP7|F6YVP7_MOUSE Predicted gene 10260 OS=Mus musculus GN=Gm10260 PE=3 SV=2;sp|P62270|RS18_MOUSE 40S ribosomal protein S18 OS=Mus musculus GN=Rps18 PE=1 SV=3;tr|Q3TW65|Q	6	9	9	9	50	17.718		966660000	67929000	96201000	123560000	92188000	107530000	113840000	127050000	107880000	130470000
F6Z025;Q3TND6;O54782	tr|F6Z025|F6Z025_MOUSE Epididymis-specific alpha-mannosidase (Fragment) OS=Mus musculus GN=Man2b2 PE=1 SV=1;tr|Q3TND6|Q3TND6_MOUSE Alpha-mannosidase OS=Mus musculus GN=Man2b2 PE=2 SV=1;sp|O54782|MA2B2_MOUSE Epididymis-specific alpha-mannosidase OS=Mus musc	3	1	1	1	12.5	11.521		9322800	2807500	0	0	0	0	0	2494200	4021100	0
F6ZFT1;F8WJ64;Q569N0;Q3TJG2;Q9CR21	tr|F6ZFT1|F6ZFT1_MOUSE Acyl carrier protein (Fragment) OS=Mus musculus GN=Ndufab1 PE=1 SV=1;tr|F8WJ64|F8WJ64_MOUSE Acyl carrier protein (Fragment) OS=Mus musculus GN=Ndufab1 PE=1 SV=1;tr|Q569N0|Q569N0_MOUSE Acyl carrier protein OS=Mus musculus GN=Ndufab1 P	5	2	2	2	11.8	14.309		73766000	1675100	0	0	8513700	12321000	12367000	12151000	12054000	14684000
F6ZHD8;Q9D6Y9;Q8C7E6;G3UW30;Q8BT78	tr|F6ZHD8|F6ZHD8_MOUSE 1,4-alpha-glucan-branching enzyme OS=Mus musculus GN=Gbe1 PE=1 SV=2;sp|Q9D6Y9|GLGB_MOUSE 1,4-alpha-glucan-branching enzyme OS=Mus musculus GN=Gbe1 PE=1 SV=1;tr|Q8C7E6|Q8C7E6_MOUSE Uncharacterized protein OS=Mus musculus PE=2 SV=1;tr|	5	4	4	4	6.6	80.336		24660000	1900600	1044100	1436000	2772300	3083600	4665600	3132500	3145700	3479500
S4R1E5;Q8K4U7;Q3TI34;Q5XJZ8;Q76LV0;F7A8H6;O70325;Q91XR9;Q3TIF2	tr|S4R1E5|S4R1E5_MOUSE Glutathione peroxidase OS=Mus musculus GN=Gpx4 PE=1 SV=1;tr|Q8K4U7|Q8K4U7_MOUSE Glutathione peroxidase OS=Mus musculus GN=PHGPx PE=3 SV=2;tr|Q3TI34|Q3TI34_MOUSE Glutathione peroxidase OS=Mus musculus GN=Gpx4 PE=2 SV=2;tr|Q5XJZ8|Q5XJZ	9	2	2	2	14.6	17.937		48576000	4501100	749890	4420700	3039300	7060800	10319000	5813000	3367900	9304600
Q6ZWZ6;F7AEH4;A0A1W2P7A1;P63323	tr|Q6ZWZ6|Q6ZWZ6_MOUSE 40S ribosomal protein S12 OS=Mus musculus GN=Rps12 PE=1 SV=1;tr|F7AEH4|F7AEH4_MOUSE 40S ribosomal protein S12 OS=Mus musculus GN=Rps12 PE=1 SV=1;tr|A0A1W2P7A1|A0A1W2P7A1_MOUSE 40S ribosomal protein S12 OS=Mus musculus GN=Rps12 PE=1 S	4	6	6	6	56.1	14.515		1044700000	67749000	52687000	76638000	125250000	119420000	158640000	132970000	140800000	170600000
F7BTP8;Q3UL32;Q9QYI3	tr|F7BTP8|F7BTP8_MOUSE DnaJ homolog subfamily C member 7 (Fragment) OS=Mus musculus GN=Dnajc7 PE=1 SV=1;tr|Q3UL32|Q3UL32_MOUSE Uncharacterized protein OS=Mus musculus GN=Dnajc7 PE=2 SV=1;sp|Q9QYI3|DNJC7_MOUSE DnaJ homolog subfamily C member 7 OS=Mus muscul	3	2	2	2	9.7	29.515		6522000	480730	1098400	840740	452500	571840	992830	1086700	998160	0
G3UXX9;Q8R5C0;F7C846;P47802;G3XA66;D3Z3F4;D3YVW0	tr|G3UXX9|G3UXX9_MOUSE Metaxin-1 (Fragment) OS=Mus musculus GN=Mtx1 PE=1 SV=1;tr|Q8R5C0|Q8R5C0_MOUSE Metaxin OS=Mus musculus GN=Mtx1 PE=2 SV=1;tr|F7C846|F7C846_MOUSE Metaxin-1 OS=Mus musculus GN=Mtx1 PE=1 SV=1;sp|P47802|MTX1_MOUSE Metaxin-1 OS=Mus musculus	7	2	2	2	14.1	21.092		2013300	0	0	2013300	0	0	0	0	0	0
F7C9F6	tr|F7C9F6|F7C9F6_MOUSE Aryl hydrocarbon receptor nuclear translocator (Fragment) OS=Mus musculus GN=Arnt PE=1 SV=1	1	1	1	1	5.6	13.971		184970000	27757000	2478200	3781700	26230000	29689000	31557000	32539000	30934000	0
F7DC05	tr|F7DC05|F7DC05_MOUSE Myeloperoxidase (Fragment) OS=Mus musculus GN=Mpo PE=1 SV=1	1	9	1	1	86.2	15.397		12508000	1603700	0	0	1096700	1658900	1565000	2464600	1969000	2150200
F8VPX1;Q6A4J8;E9PXY8;E0CY04;G3UWR8	tr|F8VPX1|F8VPX1_MOUSE Ubiquitin carboxyl-terminal hydrolase 7 OS=Mus musculus GN=Usp7 PE=1 SV=1;sp|Q6A4J8|UBP7_MOUSE Ubiquitin carboxyl-terminal hydrolase 7 OS=Mus musculus GN=Usp7 PE=1 SV=1;tr|E9PXY8|E9PXY8_MOUSE Ubiquitin carboxyl-terminal hydrolase 7 O	5	6	6	6	6.2	128.47		6712100	84248	578270	1135200	530170	678460	1239100	493590	1102700	870410
F8VQ05;A0A0J9YUJ6;Q8BIA1;Q80XD5;A0A0J9YUH4;Q8CHD0	tr|F8VQ05|F8VQ05_MOUSE FRY-like transcription coactivator OS=Mus musculus GN=Fryl PE=1 SV=1;tr|A0A0J9YUJ6|A0A0J9YUJ6_MOUSE FRY-like transcription coactivator (Fragment) OS=Mus musculus GN=Fryl PE=1 SV=3;tr|Q8BIA1|Q8BIA1_MOUSE Uncharacterized protein OS=Mus	6	2	2	2	0.6	337.82		281890	0	54586	57881	22791	28114	29878	29040	23679	35921
F8VQ28;Q8VI36;Q3UG90;Q99LE7;A0A1D5RMM8	tr|F8VQ28|F8VQ28_MOUSE Paxillin OS=Mus musculus GN=Pxn PE=1 SV=1;sp|Q8VI36|PAXI_MOUSE Paxillin OS=Mus musculus GN=Pxn PE=1 SV=1;tr|Q3UG90|Q3UG90_MOUSE Uncharacterized protein OS=Mus musculus GN=Pxn PE=2 SV=1;tr|Q99LE7|Q99LE7_MOUSE Pxn protein (Fragment) OS	5	16	16	5	36.2	64.506		220830000	20967000	22078000	20257000	22894000	21762000	32634000	30892000	23493000	25858000
F8VQC1;Q3UZL8;A0JLN1;E9Q740;A0PJ97;Q3UU23;Q9CS54	tr|F8VQC1|F8VQC1_MOUSE Signal recognition particle subunit SRP72 OS=Mus musculus GN=Srp72 PE=1 SV=1;tr|Q3UZL8|Q3UZL8_MOUSE Uncharacterized protein (Fragment) OS=Mus musculus GN=Srp72 PE=2 SV=1;tr|A0JLN1|A0JLN1_MOUSE Srp72 protein (Fragment) OS=Mus musculus	7	9	9	9	16.4	74.656		34111000	4067800	2528500	2528800	3739200	3440400	4959700	3410900	6359000	3077000
F8WGB3;Q5XK33;Q9CZB0	tr|F8WGB3|F8WGB3_MOUSE Succinate dehydrogenase cytochrome b560 subunit, mitochondrial OS=Mus musculus GN=Sdhc PE=1 SV=1;tr|Q5XK33|Q5XK33_MOUSE Succinate dehydrogenase complex, subunit C, integral membrane protein OS=Mus musculus GN=Sdhc PE=2 SV=1;sp|Q9CZB0	3	1	1	1	9.6	14.51		18276000	2410900	352450	1040900	1789900	2054600	2336700	3252000	1897300	3141200
Q99J48;Q548T0;F8WGM5;Q64324;A0A140LJH9;A0A140LHM1	tr|Q99J48|Q99J48_MOUSE Stxbp2 protein (Fragment) OS=Mus musculus GN=Stxbp2 PE=2 SV=1;tr|Q548T0|Q548T0_MOUSE Syntaxin binding protein 2, isoform CRA_e OS=Mus musculus GN=Stxbp2 PE=1 SV=1;tr|F8WGM5|F8WGM5_MOUSE Syntaxin-binding protein 2 (Fragment) OS=Mus mu	6	10	10	10	22.1	66.313		61982000	3950600	4556000	4764200	7330100	7969600	10221000	6631400	8225400	8333200
F8WH41;Q3UWX9;O55106;F6Z700;Q8BKL4	tr|F8WH41|F8WH41_MOUSE Striatin OS=Mus musculus GN=Strn PE=1 SV=1;tr|Q3UWX9|Q3UWX9_MOUSE Uncharacterized protein (Fragment) OS=Mus musculus GN=Strn PE=2 SV=1;sp|O55106|STRN_MOUSE Striatin OS=Mus musculus GN=Strn PE=1 SV=2;tr|F6Z700|F6Z700_MOUSE Striatin (F	5	5	5	5	9.7	69.119		13731000	2822600	2611300	2644000	900130	984130	1866400	0	604180	1298700
Q3UBI5;F8WH69;Q09014;Q3U9Y3;Q3UA02;Q7TMH0;S4R293	tr|Q3UBI5|Q3UBI5_MOUSE Uncharacterized protein OS=Mus musculus GN=Ncf1 PE=2 SV=1;tr|F8WH69|F8WH69_MOUSE Neutrophil cytosol factor 1 OS=Mus musculus GN=Ncf1 PE=1 SV=1;sp|Q09014|NCF1_MOUSE Neutrophil cytosol factor 1 OS=Mus musculus GN=Ncf1 PE=1 SV=3;tr|Q3U9	7	22	22	22	52.2	45.987		816040000	66418000	49564000	40389000	91108000	92788000	124380000	109290000	109650000	132460000
Q63ZW9;Q8BTF0;F8WHL2;Q8CIE6;Q8R393;Q99JW9;Q8BTF3;F6XJN3	tr|Q63ZW9|Q63ZW9_MOUSE Copa protein (Fragment) OS=Mus musculus GN=Copa PE=2 SV=1;tr|Q8BTF0|Q8BTF0_MOUSE Coatomer subunit alpha OS=Mus musculus GN=Copa PE=2 SV=1;tr|F8WHL2|F8WHL2_MOUSE Coatomer subunit alpha OS=Mus musculus GN=Copa PE=1 SV=1;sp|Q8CIE6|COPA_	8	21	21	21	22	127.23		54065000	4149200	4781700	5076200	5494800	8135100	7213500	5250700	6655600	7307800
F8WHM5;Q53WR6;Q61543;Q8BQH1;F6RSH1	tr|F8WHM5|F8WHM5_MOUSE Golgi apparatus protein 1 (Fragment) OS=Mus musculus GN=Glg1 PE=1 SV=1;tr|Q53WR6|Q53WR6_MOUSE E-selectin ligand 1 OS=Mus musculus GN=Glg1 PE=1 SV=1;sp|Q61543|GSLG1_MOUSE Golgi apparatus protein 1 OS=Mus musculus GN=Glg1 PE=1 SV=1	5	4	4	4	4.3	132.35		4186100	766200	761730	133180	430930	90266	416150	181350	703450	702830
F8WHP8;P56135	tr|F8WHP8|F8WHP8_MOUSE ATP synthase subunit f, mitochondrial OS=Mus musculus GN=Atp5j2 PE=1 SV=1;sp|P56135|ATPK_MOUSE ATP synthase subunit f, mitochondrial OS=Mus musculus GN=Atp5j2 PE=1 SV=3	2	2	2	2	30.3	9.0054		243960000	16464000	14848000	12911000	32070000	29577000	51449000	27616000	29527000	29497000
F8WHR6;Q569Z5	tr|F8WHR6|F8WHR6_MOUSE Probable ATP-dependent RNA helicase DDX46 OS=Mus musculus GN=Ddx46 PE=1 SV=1;sp|Q569Z5|DDX46_MOUSE Probable ATP-dependent RNA helicase DDX46 OS=Mus musculus GN=Ddx46 PE=1 SV=2	2	6	6	6	7.7	117		4366400	578230	649700	568100	360030	134650	606930	614450	681710	172560
F8WHU5;Q4VA53	tr|F8WHU5|F8WHU5_MOUSE Sister chromatid cohesion protein PDS5 homolog B OS=Mus musculus GN=Pds5b PE=1 SV=1;sp|Q4VA53|PDS5B_MOUSE Sister chromatid cohesion protein PDS5 homolog B OS=Mus musculus GN=Pds5b PE=1 SV=1	2	7	6	6	6.1	164.76		7358800	517780	570040	464180	688070	668650	1045400	1376900	591720	1436100
F8WI31;Q922V4;D3Z4V1	tr|F8WI31|F8WI31_MOUSE Pleiotropic regulator 1 OS=Mus musculus GN=Plrg1 PE=1 SV=1;sp|Q922V4|PLRG1_MOUSE Pleiotropic regulator 1 OS=Mus musculus GN=Plrg1 PE=1 SV=1;tr|D3Z4V1|D3Z4V1_MOUSE Pleiotropic regulator 1 OS=Mus musculus GN=Plrg1 PE=1 SV=1	3	3	3	3	18.3	42.438		6127500	510190	0	267110	892390	819610	1168200	529530	574610	1365900
F8WIK0;Q8WTY4;F7BWP1;E0CYY1	tr|F8WIK0|F8WIK0_MOUSE Anamorsin OS=Mus musculus GN=Ciapin1 PE=1 SV=2;sp|Q8WTY4|CPIN1_MOUSE Anamorsin OS=Mus musculus GN=Ciapin1 PE=1 SV=1;tr|F7BWP1|F7BWP1_MOUSE Anamorsin (Fragment) OS=Mus musculus GN=Ciapin1 PE=1 SV=2	4	5	5	5	23.9	33.429		37376000	3523100	6588800	3736200	2960800	2694400	2946900	6969000	5689800	2267100
Q547B5;Q3UZY3;Q3UBR1;Q3TND2;Q66JX3;Q3TLP1;F8WIP8;P10923	tr|Q547B5|Q547B5_MOUSE Osteopontin OS=Mus musculus GN=Spp1 PE=1 SV=1;tr|Q3UZY3|Q3UZY3_MOUSE Uncharacterized protein OS=Mus musculus GN=Spp1 PE=2 SV=1;tr|Q3UBR1|Q3UBR1_MOUSE Uncharacterized protein OS=Mus musculus GN=Spp1 PE=2 SV=1;tr|Q3TND2|Q3TND2_MOUSE Un	8	1	1	1	4.4	32.459		2714200	0	0	0	877600	846420	990190	0	0	0
Q3U7I9;F8WIR1;Q3UCD9;Q3UAQ1;Q3U7P0;Q3U651;Q3TXL5;Q3TWR6;Q3TWD0;Q8C243;P18242;F6Y6L6;Q3UC89;Q3TJN3;Q3U8W5;Q3UCW4;Q3TIR0;Q3TWL1;Q8VCK2;A0A1B0GT66;Q05BF3	tr|Q3U7I9|Q3U7I9_MOUSE Uncharacterized protein OS=Mus musculus GN=Ctsd PE=2 SV=1;tr|F8WIR1|F8WIR1_MOUSE Cathepsin D OS=Mus musculus GN=Ctsd PE=1 SV=2;tr|Q3UCD9|Q3UCD9_MOUSE Cathepsin D, isoform CRA_a OS=Mus musculus GN=Ctsd PE=1 SV=1;tr|Q3UAQ1|Q3UAQ1_MOUSE	21	7	7	7	23.8	44.314		145160000	12363000	20875000	26105000	5623600	5971800	6322000	21484000	21336000	25079000
Q99JX6;Q3TUI1;F8WIT2;Q3UI56;P14824;Q3UDK4;Q3V2Z4;Q8CEX0	tr|Q99JX6|Q99JX6_MOUSE Annexin OS=Mus musculus GN=Anxa6 PE=2 SV=1;tr|Q3TUI1|Q3TUI1_MOUSE Annexin OS=Mus musculus GN=Anxa6 PE=2 SV=1;tr|F8WIT2|F8WIT2_MOUSE Annexin OS=Mus musculus GN=Anxa6 PE=1 SV=1;tr|Q3UI56|Q3UI56_MOUSE Annexin OS=Mus musculus GN=Anxa6 PE	8	14	14	14	23.5	75.26		52679000	5789600	3637800	2569800	5252200	6201200	6853500	8367800	6617700	7389000
H7BXB9;F8WIU1;Q9D1K7	tr|H7BXB9|H7BXB9_MOUSE RIKEN cDNA 1700037H04 gene (Fragment) OS=Mus musculus GN=1700037H04Rik PE=1 SV=1;tr|F8WIU1|F8WIU1_MOUSE RIKEN cDNA 1700037H04 gene OS=Mus musculus GN=1700037H04Rik PE=1 SV=1;sp|Q9D1K7|CT027_MOUSE UPF0687 protein C20orf27 homolog OS=M	3	1	1	1	9.9	15.773		56701000	5480800	7609400	10951000	4613300	3981900	7384900	5531300	5052500	6096900
Q4FJQ6;Q3U3L3;F8WIV2;Q60854;E9PYY0;E9Q3Y1;Q8BZR2;E9Q6X2;E9Q108;E9Q0P9;K7E6F1;E9PZQ9;E9Q4R2	tr|Q4FJQ6|Q4FJQ6_MOUSE Serine (Or cysteine) peptidase inhibitor, clade B, member 6a, isoform CRA_a OS=Mus musculus GN=Serpinb6a PE=1 SV=1;tr|Q3U3L3|Q3U3L3_MOUSE Uncharacterized protein OS=Mus musculus GN=Serpinb6a PE=2 SV=1;tr|F8WIV2|F8WIV2_MOUSE Serine (o	13	3	3	3	9	42.598		28202000	4200300	2606400	4767200	3350400	1264800	5611000	2867100	2673200	861780
F8WJ41;Q5M9M4;P62245;D3Z712;D3YVB4	tr|F8WJ41|F8WJ41_MOUSE 40S ribosomal protein S15a (Fragment) OS=Mus musculus GN=Rps15a PE=1 SV=1;tr|Q5M9M4|Q5M9M4_MOUSE Ribosomal protein S15A OS=Mus musculus GN=Rps15a PE=1 SV=1;sp|P62245|RS15A_MOUSE 40S ribosomal protein S15a OS=Mus musculus GN=Rps15a PE	5	4	4	4	30.6	12.31		744260000	61145000	71213000	45250000	65176000	68573000	81888000	116740000	84074000	150200000
Q3TN10;F8WJD4;Q80X82;D3Z2M2;S4R2Q3;Q3U2V0;Q3U2B5	tr|Q3TN10|Q3TN10_MOUSE Uncharacterized protein OS=Mus musculus GN=Sympk PE=2 SV=1;tr|F8WJD4|F8WJD4_MOUSE Symplekin OS=Mus musculus GN=Sympk PE=1 SV=1;sp|Q80X82|SYMPK_MOUSE Symplekin OS=Mus musculus GN=Sympk PE=1 SV=1;tr|D3Z2M2|D3Z2M2_MOUSE Symplekin (Fragm	7	2	2	2	2.2	119.31		1838500	167610	294100	349140	128800	98854	294360	192850	128030	184740
F8WJK8;Q3U9V1;Q3U8D2;Q3U3N7;Q99L47;Q3TGW8;E9Q1V0;E9Q1X9	tr|F8WJK8|F8WJK8_MOUSE Hsc70-interacting protein OS=Mus musculus GN=St13 PE=1 SV=1;tr|Q3U9V1|Q3U9V1_MOUSE Uncharacterized protein OS=Mus musculus GN=St13 PE=2 SV=1;tr|Q3U8D2|Q3U8D2_MOUSE Uncharacterized protein OS=Mus musculus GN=St13 PE=2 SV=1;tr|Q3U3N7|Q	8	8	8	8	21.5	40.538		153550000	17067000	20540000	22303000	9711700	15438000	11211000	22216000	18596000	16465000
G3CE24;G3CE68;G3CE17;G3CDY6;G3CE70;G3BKB2;Q9CRC0	tr|G3CE24|G3CE24_MOUSE Vitamin K epoxide reductase complex subunit 1 (Fragment) OS=Mus musculus domesticus GN=Vkorc1 PE=4 SV=1;tr|G3CE68|G3CE68_MOUSE Vitamin K epoxide reductase complex subunit 1 (Fragment) OS=Mus musculus domesticus GN=Vkorc1 PE=4 SV=1;tr	7	1	1	1	22.8	6.1131		93425000	11635000	11827000	18668000	6581400	0	10463000	12540000	8866300	12844000
G3UVU6;Q9R0X0	tr|G3UVU6|G3UVU6_MOUSE Predicted gene 20517 OS=Mus musculus GN=Gm20517 PE=4 SV=1;sp|Q9R0X0|MED20_MOUSE Mediator of RNA polymerase II transcription subunit 20 OS=Mus musculus GN=Med20 PE=1 SV=1	2	1	1	1	7.2	16.461		808630	375530	0	0	433100	0	0	0	0	0
G3UVV4;Q6GQU1;Q3TJE3;P17710;Q3TTB4;Q3UE51;Q3UPC4;D3YYR4;D3Z365	tr|G3UVV4|G3UVV4_MOUSE Hexokinase 1, isoform CRA_f OS=Mus musculus GN=Hk1 PE=1 SV=1;tr|Q6GQU1|Q6GQU1_MOUSE Hexokinase 1, isoform CRA_d OS=Mus musculus GN=Hk1 PE=2 SV=1;tr|Q3TJE3|Q3TJE3_MOUSE Uncharacterized protein OS=Mus musculus GN=Hk1 PE=2 SV=1;sp|P1771	9	13	10	8	15.2	101.87		24180000	2189600	1802700	2267500	2723000	1584900	3121200	3473300	1579700	5437700
G3UWD2;Q3UM65;Q03347;Q8BQ09;G3X9W7;Q6NSS1	tr|G3UWD2|G3UWD2_MOUSE Runt-related transcription factor OS=Mus musculus GN=Runx1 PE=1 SV=1;tr|Q3UM65|Q3UM65_MOUSE Runt-related transcription factor OS=Mus musculus GN=Runx1 PE=1 SV=1;sp|Q03347|RUNX1_MOUSE Runt-related transcription factor 1 OS=Mus musculu	6	2	2	2	6	48.583		10342000	756380	1274800	1303800	0	1179800	1569600	1652600	1482700	1122000
H3BLQ0;Q3TTF6;H3BKU1;Q8BIX1;G3UWS4;Q7TNP2;H3BIV7;H3BLE7	tr|H3BLQ0|H3BLQ0_MOUSE Serine/threonine-protein phosphatase 2A 65 kDa regulatory subunit A beta isoform OS=Mus musculus GN=Ppp2r1b PE=1 SV=1;tr|Q3TTF6|Q3TTF6_MOUSE Serine/threonine-protein phosphatase 2A 65 kDa regulatory subunit A beta isoform OS=Mus musc	8	5	1	1	14.4	61.048		7777600	1238800	0	0	0	1168000	2090100	1572300	0	1708500
G3UWV2;G3UYJ6;G3UYD0;Q3UHU8;Q9ESZ8	tr|G3UWV2|G3UWV2_MOUSE General transcription factor II-I (Fragment) OS=Mus musculus GN=Gtf2i PE=1 SV=1;tr|G3UYJ6|G3UYJ6_MOUSE General transcription factor II-I (Fragment) OS=Mus musculus GN=Gtf2i PE=1 SV=2;tr|G3UYD0|G3UYD0_MOUSE General transcription facto	5	1	1	1	10.1	18.973		5209100	0	0	759470	571010	899340	564300	420050	726650	1268300
G3UWV3;Q6XLQ8;Q3UG11;Q3TUF3;Q3TL33;O35887;G3UXA3;G3V004;G3UXA8;G3UY49;G3UWR0;Q3TQD1	tr|G3UWV3|G3UWV3_MOUSE Calumenin OS=Mus musculus GN=Calu PE=1 SV=1;tr|Q6XLQ8|Q6XLQ8_MOUSE Calumenin OS=Mus musculus GN=Calu PE=1 SV=1;tr|Q3UG11|Q3UG11_MOUSE Uncharacterized protein OS=Mus musculus GN=Calu PE=2 SV=1;tr|Q3TUF3|Q3TUF3_MOUSE Calumenin, isoform	12	4	4	4	25.3	17.71		191040000	16024000	0	0	26874000	16584000	43026000	12893000	33490000	42149000
G3UWZ0;O88379;Q8C8D1;Q6P1D9	tr|G3UWZ0|G3UWZ0_MOUSE Bromodomain adjacent to zinc finger domain protein 1A OS=Mus musculus GN=Baz1a PE=1 SV=1;sp|O88379|BAZ1A_MOUSE Bromodomain adjacent to zinc finger domain protein 1A OS=Mus musculus GN=Baz1a PE=1 SV=3;tr|Q8C8D1|Q8C8D1_MOUSE Uncharacte	4	2	2	2	1.9	178.17		1242400	259550	0	0	151670	111950	112920	390270	0	216020
G8JL74;G3UXA6;Q8BHD7;G3UZ01;G3UY95;F7C521;G3UXZ8;G3UXZ6;Q8C5Q1	tr|G8JL74|G8JL74_MOUSE Polypyrimidine tract-binding protein 3 OS=Mus musculus GN=Ptbp3 PE=1 SV=1;tr|G3UXA6|G3UXA6_MOUSE Polypyrimidine tract-binding protein 3 OS=Mus musculus GN=Ptbp3 PE=1 SV=1;sp|Q8BHD7|PTBP3_MOUSE Polypyrimidine tract-binding protein 3 O	9	16	16	13	38.7	59.465		308430000	32298000	17109000	21963000	36475000	34376000	47516000	36055000	42127000	40514000
G3UXF0;Q4FJZ2;Q8BH30;O35345;Q60960	tr|G3UXF0|G3UXF0_MOUSE Importin subunit alpha-5 (Fragment) OS=Mus musculus GN=Kpna1 PE=1 SV=1;tr|Q4FJZ2|Q4FJZ2_MOUSE Importin subunit alpha OS=Mus musculus GN=Kpna6 PE=1 SV=1;tr|Q8BH30|Q8BH30_MOUSE Importin subunit alpha OS=Mus musculus GN=Kpna6 PE=1 SV=1;	5	1	1	1	6.1	25.588		819960	0	0	0	0	0	819960	0	0	0
G3UXK7;Q8BP79;P53702	tr|G3UXK7|G3UXK7_MOUSE Cytochrome c-type heme lyase OS=Mus musculus GN=Hccs PE=1 SV=1;tr|Q8BP79|Q8BP79_MOUSE Cytochrome c heme lyase OS=Mus musculus GN=Hccs PE=2 SV=1;sp|P53702|CCHL_MOUSE Cytochrome c-type heme lyase OS=Mus musculus GN=Hccs PE=1 SV=2	3	1	1	1	10.8	9.5524		32710000	0	0	0	4626600	0	8735100	4535600	5429400	9383100
G3UXT7;Q8CFQ9;Q564D0;Q3USY4;Q3UK30;P56959;G3UZD2;Q91VQ2;F6QCI0;Q3TLE4;Q8BQ46	tr|G3UXT7|G3UXT7_MOUSE RNA-binding protein FUS (Fragment) OS=Mus musculus GN=Fus PE=1 SV=1;tr|Q8CFQ9|Q8CFQ9_MOUSE Fusion, derived from t(1216) malignant liposarcoma (Human) OS=Mus musculus GN=Fus PE=1 SV=1;tr|Q564D0|Q564D0_MOUSE Fusion, derived from t(12;1	11	6	6	6	57.7	13.897		344300000	38676000	26661000	30094000	31372000	37116000	59125000	26882000	42494000	51876000
G3UXX3;Q91XH5;Q64105;G3UZ79	tr|G3UXX3|G3UXX3_MOUSE Sepiapterin reductase OS=Mus musculus GN=Spr PE=1 SV=1;tr|Q91XH5|Q91XH5_MOUSE Sepiapterin reductase OS=Mus musculus GN=Spr PE=1 SV=1;sp|Q64105|SPRE_MOUSE Sepiapterin reductase OS=Mus musculus GN=Spr PE=1 SV=1	4	3	3	3	21.9	23.357		10616000	869190	0	0	1081000	1518200	2049200	2511600	1343500	1243700
G3UXZ5;Q5HZK3;P97371;G3UXY0;G3UWN9;G3X9K9;G3UXR1	tr|G3UXZ5|G3UXZ5_MOUSE Proteasome activator complex subunit 1 (Fragment) OS=Mus musculus GN=Psme1 PE=1 SV=1;tr|Q5HZK3|Q5HZK3_MOUSE Proteasome (Prosome, macropain) 28 subunit, alpha OS=Mus musculus GN=Psme1 PE=1 SV=1;sp|P97371|PSME1_MOUSE Proteasome activat	7	13	13	13	50.4	27.411		534570000	55748000	40809000	47391000	54336000	56956000	70430000	69135000	65594000	74176000
G3UY42;Q8CCS6;G3UX74;D3YUB9;D3Z055;G3UWS5;D3Z5F7	tr|G3UY42|G3UY42_MOUSE Polyadenylate-binding protein 2 OS=Mus musculus GN=Pabpn1 PE=1 SV=1;sp|Q8CCS6|PABP2_MOUSE Polyadenylate-binding protein 2 OS=Mus musculus GN=Pabpn1 PE=1 SV=3;tr|G3UX74|G3UX74_MOUSE Polyadenylate-binding protein 2 OS=Mus musculus GN=P	7	2	2	2	8.5	34.003		113710000	245250	18936000	29930000	7863900	9453700	11891000	11846000	11084000	12459000
Q7TPT7;Q790I0;G3UY93;Q9Z1Q9;Q3U3D3;Q3TII4;G3UZ22;G3UYW2;G3UZX1	tr|Q7TPT7|Q7TPT7_MOUSE Valyl-tRNA synthetase OS=Mus musculus GN=Vars PE=2 SV=1;tr|Q790I0|Q790I0_MOUSE Valyl-tRNA synthetase 2, isoform CRA_b OS=Mus musculus GN=Vars PE=1 SV=1;tr|G3UY93|G3UY93_MOUSE Valine--tRNA ligase (Fragment) OS=Mus musculus GN=Vars PE=	9	23	23	23	24.5	140.23		78061000	7285200	7899600	12553000	6393200	9394800	9657400	8106700	8117100	8653800
G3UYF9;Q792E4;Q03958	tr|G3UYF9|G3UYF9_MOUSE Prefoldin subunit 6 OS=Mus musculus GN=Pfdn6 PE=1 SV=1;tr|Q792E4|Q792E4_MOUSE H2-K region expressed gene 2 OS=Mus musculus GN=Pfdn6 PE=1 SV=1;sp|Q03958|PFD6_MOUSE Prefoldin subunit 6 OS=Mus musculus GN=Pfdn6 PE=1 SV=1	3	2	2	2	25.7	11.409		46445000	0	2314000	2160700	5206600	5674100	7228600	7930800	6657400	9273300
Q8CFZ0;G3UYP0;P63280;G3UWL6;G3UWJ1	tr|Q8CFZ0|Q8CFZ0_MOUSE SUMO-conjugating enzyme UBC9 OS=Mus musculus GN=Ube2i PE=1 SV=1;tr|G3UYP0|G3UYP0_MOUSE SUMO-conjugating enzyme UBC9 (Fragment) OS=Mus musculus GN=Ube2i PE=1 SV=1;sp|P63280|UBC9_MOUSE SUMO-conjugating enzyme UBC9 OS=Mus musculus GN=Ub	5	4	4	4	47.5	11.225		198160000	15428000	5912700	7426600	27030000	25840000	40052000	17073000	26051000	33351000
G3UYQ2;G3UZT6;Q3UF95;Q9Z1R2;Q8HWH4;G3UXT8;A0A1B0GX81;Q3TDL4;Q9CRG8;S4R224;G3UYZ0;G3V013	tr|G3UYQ2|G3UYQ2_MOUSE Large proline-rich protein BAG6 OS=Mus musculus GN=Bag6 PE=1 SV=1;tr|G3UZT6|G3UZT6_MOUSE Large proline-rich protein BAG6 OS=Mus musculus GN=Bag6 PE=1 SV=1;tr|Q3UF95|Q3UF95_MOUSE Large proline-rich protein BAG6 OS=Mus musculus GN=Bag6	12	3	3	3	4.8	113.37		7690700	355690	580930	1674800	298500	244370	1993500	0	316340	2226600
G3UYV7;Q059I1;P62858	tr|G3UYV7|G3UYV7_MOUSE 40S ribosomal protein S28 (Fragment) OS=Mus musculus GN=Rps28 PE=1 SV=1;tr|Q059I1|Q059I1_MOUSE MCG22987, isoform CRA_a OS=Mus musculus GN=Rps28 PE=1 SV=1;sp|P62858|RS28_MOUSE 40S ribosomal protein S28 OS=Mus musculus GN=Rps28 PE=1 SV	3	3	3	3	57.1	6.3442		879330000	71196000	114970000	40683000	93663000	59915000	197030000	87836000	114090000	99952000
G3UZ26;Q9CWR5;P50431;G3UYY1;G3UZZ9	tr|G3UZ26|G3UZ26_MOUSE Serine hydroxymethyltransferase, cytosolic (Fragment) OS=Mus musculus GN=Shmt1 PE=1 SV=1;tr|Q9CWR5|Q9CWR5_MOUSE Serine hydroxymethyltransferase OS=Mus musculus GN=Shmt1 PE=2 SV=1;sp|P50431|GLYC_MOUSE Serine hydroxymethyltransferase,	5	5	4	4	13.2	48.334		15931000	1229500	2776900	3608400	1434900	1496700	1912700	506190	668510	2296900
Q6PE06;G3UZG5;G3UZ63;G3X961;Q921I2	tr|Q6PE06|Q6PE06_MOUSE Klhdc4 protein OS=Mus musculus GN=Klhdc4 PE=2 SV=1;tr|G3UZG5|G3UZG5_MOUSE Kelch domain-containing protein 4 OS=Mus musculus GN=Klhdc4 PE=1 SV=1;tr|G3UZ63|G3UZ63_MOUSE Kelch domain-containing protein 4 OS=Mus musculus GN=Klhdc4 PE=1 S	5	1	1	1	3.4	48.638		1479000	0	561380	917640	0	0	0	0	0	0
G3UZJ5;N0E4C0;N0E4C5;N0E463;P67871;G3UZA4;N0E462;G3UXG7;G3UZX4;G3UXU2;G3UWU5;N0E636	tr|G3UZJ5|G3UZJ5_MOUSE Casein kinase II subunit beta (Fragment) OS=Mus musculus GN=Csnk2b PE=1 SV=2;tr|N0E4C0|N0E4C0_MOUSE Casein kinase II subunit beta OS=Mus musculus GN=Csnk2b PE=2 SV=1;tr|N0E4C5|N0E4C5_MOUSE Casein kinase II subunit beta OS=Mus musculu	12	4	4	4	27.2	23.621		82983000	14709000	12976000	19496000	1002700	11244000	6822700	4390600	4674400	7666900
G3UZK1;Q9CXP8	tr|G3UZK1|G3UZK1_MOUSE Guanine nucleotide-binding protein subunit gamma OS=Mus musculus GN=Gm20503 PE=3 SV=1;sp|Q9CXP8|GBG10_MOUSE Guanine nucleotide-binding protein G(I)/G(S)/G(O) subunit gamma-10 OS=Mus musculus GN=Gng10 PE=3 SV=1	2	1	1	1	10	16		13137000	623880	0	0	1415100	2242800	1788100	2334200	1934400	2798700
Q9CQG4;Q921E4;Q5QGU0;G3X8R0;Q60870	tr|Q9CQG4|Q9CQG4_MOUSE Receptor expression-enhancing protein OS=Mus musculus GN=Reep5 PE=2 SV=1;tr|Q921E4|Q921E4_MOUSE Receptor expression-enhancing protein OS=Mus musculus GN=Reep5 PE=2 SV=1;tr|Q5QGU0|Q5QGU0_MOUSE Receptor expression-enhancing protein OS=	5	2	2	2	10.3	21.086		248910000	32558000	41148000	16450000	25514000	18044000	31445000	24475000	32634000	26639000
Q922W2;G3X8R5;Q3UA37	tr|Q922W2|Q922W2_MOUSE Qrich1 protein OS=Mus musculus GN=Qrich1 PE=2 SV=1;tr|G3X8R5|G3X8R5_MOUSE Glutamine-rich protein 1 OS=Mus musculus GN=Qrich1 PE=1 SV=1;sp|Q3UA37|QRIC1_MOUSE Glutamine-rich protein 1 OS=Mus musculus GN=Qrich1 PE=1 SV=1	3	2	2	2	7.2	47.51		2147700	0	0	0	0	334250	266280	0	798000	749180
Q9D2D1;Q544R6;G3X8T3;P16675	tr|Q9D2D1|Q9D2D1_MOUSE Carboxypeptidase OS=Mus musculus GN=Ctsa PE=2 SV=1;tr|Q544R6|Q544R6_MOUSE Carboxypeptidase OS=Mus musculus GN=Ctsa PE=1 SV=1;tr|G3X8T3|G3X8T3_MOUSE Carboxypeptidase OS=Mus musculus GN=Ctsa PE=1 SV=1;sp|P16675|PPGB_MOUSE Lysosomal pro	4	3	3	3	7	53.829		9845500	2387300	2050900	2307000	0	643640	0	1887700	0	569060
G3X8U3;Q9D7X2	tr|G3X8U3|G3X8U3_MOUSE MCG6895 OS=Mus musculus GN=2210016F16Rik PE=1 SV=1;tr|Q9D7X2|Q9D7X2_MOUSE Uncharacterized protein OS=Mus musculus GN=2210016F16Rik PE=2 SV=1	2	2	2	2	5.9	38.615		9290800	636620	0	0	1313300	1611200	1761300	996740	938530	2033200
H9KUZ2;H9KUZ3;G3X8X6;Q62230	tr|H9KUZ2|H9KUZ2_MOUSE Sialoadhesin OS=Mus musculus GN=Siglec1 PE=1 SV=1;tr|H9KUZ3|H9KUZ3_MOUSE Sialic acid binding Ig-like lectin 1, sialoadhesin, isoform CRA_a OS=Mus musculus GN=Siglec1 PE=1 SV=1;tr|G3X8X6|G3X8X6_MOUSE Sialic acid binding Ig-like lectin	4	1	1	1	3.8	38.107		5103200	0	453060	1150400	0	0	419160	1138800	0	1941800
G3X920;Q9DBR3	tr|G3X920|G3X920_MOUSE Armadillo repeat containing 8, isoform CRA_b OS=Mus musculus GN=Armc8 PE=1 SV=1;sp|Q9DBR3|ARMC8_MOUSE Armadillo repeat-containing protein 8 OS=Mus musculus GN=Armc8 PE=1 SV=2	2	1	1	1	1.3	75.401		2424800	221120	323050	399310	255270	251090	264170	0	361970	348790
G3X956;Q920B9	tr|G3X956|G3X956_MOUSE Suppressor of Ty 16 OS=Mus musculus GN=Supt16 PE=1 SV=1;sp|Q920B9|SP16H_MOUSE FACT complex subunit SPT16 OS=Mus musculus GN=Supt16h PE=1 SV=2	2	8	8	8	9.6	119.84		26235000	2666400	1534600	1585600	3177600	3047200	4554500	3627200	3850400	2191100
Q3V222;Q80U83;Q8CGF4;G3X972;Q8R2V9	tr|Q3V222|Q3V222_MOUSE Uncharacterized protein (Fragment) OS=Mus musculus GN=Sec24c PE=2 SV=1;tr|Q80U83|Q80U83_MOUSE MKIAA0079 protein (Fragment) OS=Mus musculus GN=Sec24c PE=2 SV=1;tr|Q8CGF4|Q8CGF4_MOUSE Sec24 related gene family, member C (S. cerevisiae)	5	9	9	9	15.9	89.316		18911000	1914500	2427500	3380600	1358000	1359000	1986300	2422300	1775700	2287600
G3X9K3;D3YYK9;A2A5R2;Q3U5C3;F6YCJ0;Q8R3I7;Q3U2F2	sp|G3X9K3|BIG1_MOUSE Brefeldin A-inhibited guanine nucleotide-exchange protein 1 OS=Mus musculus GN=Arfgef1 PE=1 SV=1;tr|D3YYK9|D3YYK9_MOUSE Brefeldin A-inhibited guanine nucleotide-exchange protein 1 OS=Mus musculus GN=Arfgef1 PE=1 SV=1;sp|A2A5R2|BIG2_MOU	7	5	5	5	3.4	208.5		2747600	166560	210990	168310	280500	350570	696690	253230	231920	388780
G3X9L6;Q9DCX2;B1ASE2	tr|G3X9L6|G3X9L6_MOUSE ATP synthase subunit d, mitochondrial OS=Mus musculus GN=Gm10250 PE=3 SV=1;sp|Q9DCX2|ATP5H_MOUSE ATP synthase subunit d, mitochondrial OS=Mus musculus GN=Atp5h PE=1 SV=3;tr|B1ASE2|B1ASE2_MOUSE ATP synthase subunit d, mitochondrial (F	3	6	6	6	45.6	18.621		145710000	10100000	9934000	11368000	21713000	14238000	28079000	12628000	11643000	26010000
G3X9Q3;D3Z7R7;Q3TBD2	tr|G3X9Q3|G3X9Q3_MOUSE Histocompatibility (Minor) HA-1, isoform CRA_a OS=Mus musculus GN=Arhgap45 PE=1 SV=1;tr|D3Z7R7|D3Z7R7_MOUSE Rho GTPase-activating protein 45 OS=Mus musculus GN=Arhgap45 PE=1 SV=1;sp|Q3TBD2|HMHA1_MOUSE Rho GTPase-activating protein 45	3	25	25	25	33.1	122.86		101260000	10857000	4880300	4770900	10355000	8781500	18935000	16402000	13370000	12909000
G3XA46;P82343	tr|G3XA46|G3XA46_MOUSE N-acylglucosamine 2-epimerase OS=Mus musculus GN=Renbp PE=1 SV=1;sp|P82343|RENBP_MOUSE N-acylglucosamine 2-epimerase OS=Mus musculus GN=Renbp PE=1 SV=3	2	1	1	1	27.1	5.9838		3200800	403350	343280	233350	0	0	1224200	996590	0	0
G5E866;Q99NB9;Q3US00;A0JLN0;Q3UIB4;Q8C839;Q8C2Y9	tr|G5E866|G5E866_MOUSE Splicing factor 3B subunit 1 OS=Mus musculus GN=Sf3b1 PE=1 SV=1;sp|Q99NB9|SF3B1_MOUSE Splicing factor 3B subunit 1 OS=Mus musculus GN=Sf3b1 PE=1 SV=1;tr|Q3US00|Q3US00_MOUSE Uncharacterized protein (Fragment) OS=Mus musculus GN=Sf3b1	7	20	20	20	20.9	145.83		70791000	6955200	6748000	6622300	9640700	5734000	9349200	7766500	9758200	8217000
G5E884;O88643	tr|G5E884|G5E884_MOUSE Serine/threonine-protein kinase PAK 1 OS=Mus musculus GN=Pak1 PE=1 SV=1;sp|O88643|PAK1_MOUSE Serine/threonine-protein kinase PAK 1 OS=Mus musculus GN=Pak1 PE=1 SV=1	2	5	2	2	14.2	60.607		12549000	1569200	1524800	2174100	1050100	657810	1284100	1292500	1504900	1491100
Q6PE70;G5E8F8;O70309	tr|Q6PE70|Q6PE70_MOUSE Integrin beta OS=Mus musculus GN=Itgb5 PE=1 SV=1;tr|G5E8F8|G5E8F8_MOUSE Integrin beta OS=Mus musculus GN=Itgb5 PE=1 SV=1;sp|O70309|ITB5_MOUSE Integrin beta-5 OS=Mus musculus GN=Itgb5 PE=1 SV=2	3	1	1	1	1.1	88.051		97864000	11864000	3527500	4385500	8395900	9197600	11500000	17775000	12602000	18617000
Q5SWU0;G5E8H3;Q5SWT9;Q571F4;Q03267;Q3UQ33;Q8C9X3;Q8C5P6;Q5GGW4;Q5GGW5;A0A087WQ51;A0A087WNY4;P81183;Q8BTD0;A0A087WQ74;Q8C208;Q5SWT7	tr|Q5SWU0|Q5SWU0_MOUSE DNA-binding protein Ikaros OS=Mus musculus GN=Ikzf1 PE=1 SV=1;tr|G5E8H3|G5E8H3_MOUSE DNA-binding protein Ikaros OS=Mus musculus GN=Ikzf1 PE=1 SV=1;tr|Q5SWT9|Q5SWT9_MOUSE DNA-binding protein Ikaros OS=Mus musculus GN=Ikzf1 PE=1 SV=1;t	17	8	8	6	21.3	47.976		40055000	2916100	1604300	1505000	4612400	3841900	7795200	6389800	9004300	2385700
Q80UY7;G5E8J9;Q8CFE4	tr|Q80UY7|Q80UY7_MOUSE SCY1-like protein 2 (Fragment) OS=Mus musculus GN=Scyl2 PE=1 SV=1;tr|G5E8J9|G5E8J9_MOUSE SCY1-like protein 2 OS=Mus musculus GN=Scyl2 PE=1 SV=1;sp|Q8CFE4|SCYL2_MOUSE SCY1-like protein 2 OS=Mus musculus GN=Scyl2 PE=1 SV=1	3	1	1	1	4	31.069		3378100	0	0	0	416880	564000	544660	534190	647650	670690
G5E8N7;Q9JLV6;E9Q9A5;Q3T9F5;A0A0J9YVJ6;A0A0J9YTV1;A0A140LIZ1;A0A0J9YV48;A0A0J9YUF9;A0A0J9YUT2;A0A0J9YVH5	tr|G5E8N7|G5E8N7_MOUSE Bifunctional polynucleotide phosphatase/kinase OS=Mus musculus GN=Pnkp PE=1 SV=1;sp|Q9JLV6|PNKP_MOUSE Bifunctional polynucleotide phosphatase/kinase OS=Mus musculus GN=Pnkp PE=1 SV=2;tr|E9Q9A5|E9Q9A5_MOUSE Bifunctional polynucleotide	11	15	15	15	30.5	57.214		304770000	32403000	28310000	31733000	27560000	31882000	41662000	34718000	34432000	42071000
Q8BN38;G5E8Q0;P97412	tr|Q8BN38|Q8BN38_MOUSE Uncharacterized protein (Fragment) OS=Mus musculus GN=Lyst PE=2 SV=1;tr|G5E8Q0|G5E8Q0_MOUSE Lysosomal trafficking regulator, isoform CRA_a OS=Mus musculus GN=Lyst PE=1 SV=1;sp|P97412|LYST_MOUSE Lysosomal-trafficking regulator OS=Mus	3	2	2	2	2	146.04		466250	0	153610	136900	69387	67172	39174	0	0	0
G5E8R4;Q922D4	tr|G5E8R4|G5E8R4_MOUSE SAPS domain family, member 3, isoform CRA_c OS=Mus musculus GN=Ppp6r3 PE=1 SV=1;sp|Q922D4|PP6R3_MOUSE Serine/threonine-protein phosphatase 6 regulatory subunit 3 OS=Mus musculus GN=Ppp6r3 PE=1 SV=1	2	10	10	10	13.7	97.862		29009000	2441400	2515700	2730800	3592300	3856000	4266200	3120500	3537000	2948900
Q3UGV7;G5E8R8;Q6P5G6	tr|Q3UGV7|Q3UGV7_MOUSE UBX domain-containing protein 7 OS=Mus musculus GN=Ubxn7 PE=2 SV=1;tr|G5E8R8|G5E8R8_MOUSE UBX domain-containing protein 7 OS=Mus musculus GN=Ubxn7 PE=1 SV=1;sp|Q6P5G6|UBXN7_MOUSE UBX domain-containing protein 7 OS=Mus musculus GN=Ubx	3	2	2	2	5.7	54.842		16853000	0	2955600	2067000	1705700	1692800	2625200	1781000	2206000	1819900
Q3THU8;G5E902;Q8VEM8;Q3UB63;Q3U995	tr|Q3THU8|Q3THU8_MOUSE Uncharacterized protein OS=Mus musculus GN=Slc25a3 PE=2 SV=1;tr|G5E902|G5E902_MOUSE MCG10343, isoform CRA_b OS=Mus musculus GN=Slc25a3 PE=1 SV=1;sp|Q8VEM8|MPCP_MOUSE Phosphate carrier protein, mitochondrial OS=Mus musculus GN=Slc25a3	5	10	10	10	30.8	39.613		289690000	21607000	37839000	38704000	28345000	25583000	41172000	24295000	32072000	40072000
G5E924;Q8R081;Q3UMT7;G3UY38;Q8BI42;Q9CVU5;G3UY56;G3UYY3	tr|G5E924|G5E924_MOUSE Heterogeneous nuclear ribonucleoprotein L (Fragment) OS=Mus musculus GN=Hnrnpl PE=1 SV=1;sp|Q8R081|HNRPL_MOUSE Heterogeneous nuclear ribonucleoprotein L OS=Mus musculus GN=Hnrnpl PE=1 SV=2;tr|Q3UMT7|Q3UMT7_MOUSE Uncharacterized prote	8	19	19	19	43.3	66.821		538960000	54769000	53229000	67474000	53232000	50925000	74501000	58175000	63348000	63309000
H3BIX0;Q05BH6;Q7TPZ2;H3BL37;O08784;Q6PFZ6;F6R3V4;Q3TBZ3;Q3TAB2	tr|H3BIX0|H3BIX0_MOUSE Treacle protein (Fragment) OS=Mus musculus GN=Tcof1 PE=1 SV=1;tr|Q05BH6|Q05BH6_MOUSE Tcof1 protein (Fragment) OS=Mus musculus GN=Tcof1 PE=2 SV=1;tr|Q7TPZ2|Q7TPZ2_MOUSE Tcof1 protein (Fragment) OS=Mus musculus GN=Tcof1 PE=2 SV=1;tr|H3	9	6	6	6	8.7	107.02		13675000	1222000	2353800	3522400	787290	1877700	1193200	1204400	1413500	100790
H3BJ30;H3BJW3;Q6NVF9;H3BKW0;H3BLM9	tr|H3BJ30|H3BJ30_MOUSE Cleavage and polyadenylation-specificity factor subunit 6 OS=Mus musculus GN=Cpsf6 PE=1 SV=1;tr|H3BJW3|H3BJW3_MOUSE Cleavage and polyadenylation-specificity factor subunit 6 OS=Mus musculus GN=Cpsf6 PE=1 SV=1;sp|Q6NVF9|CPSF6_MOUSE Cl	5	7	7	7	19	59.308		53363000	4325200	2827300	5484500	7394000	7967100	6573000	10598000	5065900	3127500
H3BJU7;H3BJX8;H3BJ45;H3BJ40;H3BKH9;Q60875;Q3TYZ4;H3BJM4;H3BJ48;H3BLJ1;H3BIX8;H3BLF9;H3BJ59;H3BL15	tr|H3BJU7|H3BJU7_MOUSE Rho guanine nucleotide exchange factor 2 OS=Mus musculus GN=Arhgef2 PE=1 SV=1;tr|H3BJX8|H3BJX8_MOUSE Rho guanine nucleotide exchange factor 2 OS=Mus musculus GN=Arhgef2 PE=1 SV=1;tr|H3BJ45|H3BJ45_MOUSE Rho guanine nucleotide exchange	14	9	9	9	12.3	108.59		24218000	2539900	1403600	2183200	2457300	1659700	3999500	3343200	2621800	4009900
H3BJP2;H3BLJ9;H3BJL6;H3BKH6;Q9R0P3;H3BK43;H3BJC6	tr|H3BJP2|H3BJP2_MOUSE S-formylglutathione hydrolase (Fragment) OS=Mus musculus GN=Esd PE=1 SV=1;tr|H3BLJ9|H3BLJ9_MOUSE S-formylglutathione hydrolase OS=Mus musculus GN=Esd PE=1 SV=1;tr|H3BJL6|H3BJL6_MOUSE S-formylglutathione hydrolase OS=Mus musculus GN=E	7	6	6	6	38.5	27.131		224100000	14691000	13399000	27870000	28461000	27698000	38553000	25206000	24751000	23470000
H3BJN7;Q9DBB5	tr|H3BJN7|H3BJN7_MOUSE Predicted gene 20696 OS=Mus musculus GN=Gm20696 PE=4 SV=1;sp|Q9DBB5|IF4E3_MOUSE Eukaryotic translation initiation factor 4E type 3 OS=Mus musculus GN=Eif4e3 PE=1 SV=1	2	1	1	1	20.3	7.7117		19452000	3144100	4378100	4523200	1485500	0	0	2581700	3339700	0
Q5JC28;Q80ZL3;H3BK65;P42567;F6W2Q5;H3BJB8;A0A0R4J0A0	tr|Q5JC28|Q5JC28_MOUSE Epidermal growth factor receptor pathway substrate 15 isoform B OS=Mus musculus GN=Eps15 PE=1 SV=1;tr|Q80ZL3|Q80ZL3_MOUSE Epidermal growth factor receptor pathway substrate 15 OS=Mus musculus GN=Eps15 PE=2 SV=2;tr|H3BK65|H3BK65_MOUSE	7	8	8	8	12.2	86.677		20254000	2565300	1393400	2950300	1882600	1984900	3197000	2810900	1056200	2413700
H3BKL5;Q3UPU8;Q921H8;H3BJZ9;Q3TUU3;Q3UKM0;Q8VCH0;Q8R343;H3BKA1;Q8BLD7	tr|H3BKL5|H3BKL5_MOUSE 3-ketoacyl-CoA thiolase A, peroxisomal OS=Mus musculus GN=Acaa1a PE=1 SV=1;tr|Q3UPU8|Q3UPU8_MOUSE Uncharacterized protein OS=Mus musculus GN=Acaa1a PE=2 SV=1;sp|Q921H8|THIKA_MOUSE 3-ketoacyl-CoA thiolase A, peroxisomal OS=Mus musculu	10	3	3	3	15.5	38.361		9570600	639180	0	0	1216700	1164200	1566300	2078900	1368800	1536500
H3BLL3;Q921G6;Q6KAP0;H3BIX9;Q8C2M4;H3BK42	tr|H3BLL3|H3BLL3_MOUSE Leucine-rich repeat and calponin homology domain-containing protein 4 OS=Mus musculus GN=Lrch4 PE=1 SV=1;sp|Q921G6|LRCH4_MOUSE Leucine-rich repeat and calponin homology domain-containing protein 4 OS=Mus musculus GN=Lrch4 PE=1 SV=1;t	6	8	8	8	21.1	69.986		38920000	4381600	2514400	2261000	3612900	3666400	5954500	4562800	4243100	7723500
H7BX95;Q6PDM2;F7AI47;F6QXN3	tr|H7BX95|H7BX95_MOUSE Serine/arginine-rich-splicing factor 1 OS=Mus musculus GN=Srsf1 PE=1 SV=1;sp|Q6PDM2|SRSF1_MOUSE Serine/arginine-rich splicing factor 1 OS=Mus musculus GN=Srsf1 PE=1 SV=3;tr|F7AI47|F7AI47_MOUSE Serine/arginine-rich-splicing factor 1 (	4	8	8	8	35.6	28.329		391730000	46056000	32903000	28641000	46869000	46831000	55261000	37617000	50625000	46932000
H9KV01;H9KV15;H9KV00;Q9QX47;Q8C9T5;Q8BS91;H9KV02	tr|H9KV01|H9KV01_MOUSE Protein SON OS=Mus musculus GN=Son PE=1 SV=1;tr|H9KV15|H9KV15_MOUSE Protein SON OS=Mus musculus GN=Son PE=1 SV=1;tr|H9KV00|H9KV00_MOUSE Protein SON OS=Mus musculus GN=Son PE=1 SV=1;sp|Q9QX47|SON_MOUSE Protein SON OS=Mus musculus GN=S	7	5	5	5	3	252.18		5194100	516560	780350	873890	327990	524580	478140	511250	673760	507620
H9KV04;Q8R3C0	tr|H9KV04|H9KV04_MOUSE Mini-chromosome maintenance complex-binding protein OS=Mus musculus GN=Mcmbp PE=1 SV=1;sp|Q8R3C0|MCMBP_MOUSE Mini-chromosome maintenance complex-binding protein OS=Mus musculus GN=Mcmbp PE=1 SV=1	2	1	1	1	1.8	74.575		3435500	356170	89294	0	342700	341120	481840	767750	463800	592810
I6L9G8;Q3UIR3	tr|I6L9G8|I6L9G8_MOUSE Dtx3l protein OS=Mus musculus GN=Dtx3l PE=2 SV=1;sp|Q3UIR3|DTX3L_MOUSE E3 ubiquitin-protein ligase DTX3L OS=Mus musculus GN=Dtx3l PE=1 SV=1	2	1	1	1	2.5	76.577		1232600	347000	251990	251820	0	0	0	0	180470	201280
J3QJU7;Q3UVH0	tr|J3QJU7|J3QJU7_MOUSE Progressive rod-cone degeneration protein homolog OS=Mus musculus GN=Prcd PE=4 SV=1;tr|Q3UVH0|Q3UVH0_MOUSE Uncharacterized protein OS=Mus musculus GN=Prcd PE=2 SV=1	2	1	1	1	6.6	11.932		26787000	4431400	1290900	1556000	4087600	4108000	5519400	2054300	3739200	0
Q3TX38;Q3TTN3;Q5EBQ0;J3QMG3;Q60931;Q3UFA8	tr|Q3TX38|Q3TX38_MOUSE Uncharacterized protein OS=Mus musculus GN=Vdac3 PE=1 SV=1;tr|Q3TTN3|Q3TTN3_MOUSE Uncharacterized protein OS=Mus musculus GN=Vdac3 PE=2 SV=1;tr|Q5EBQ0|Q5EBQ0_MOUSE Voltage-dependent anion channel 3 OS=Mus musculus GN=Vdac3 PE=2 SV=1;	6	5	5	5	22.3	30.752		112670000	12328000	3853400	12709000	12625000	6561300	10426000	21645000	16722000	15800000
J3QMM7;K3W4M4;Q9CZ42;J3QN06;J3QPU6	tr|J3QMM7|J3QMM7_MOUSE ATP-dependent (S)-NAD(P)H-hydrate dehydratase OS=Mus musculus GN=Naxd PE=1 SV=1;tr|K3W4M4|K3W4M4_MOUSE ATP-dependent (S)-NAD(P)H-hydrate dehydratase OS=Mus musculus GN=Naxd PE=1 SV=1;sp|Q9CZ42|NNRD_MOUSE ATP-dependent (S)-NAD(P)H-hyd	5	5	5	5	28.1	35.169		15895000	939890	0	1016600	2285200	2670000	1585000	1373200	3179800	2845600
Q3UBP0;J3QN31;P28650	tr|Q3UBP0|Q3UBP0_MOUSE Adenylosuccinate synthetase isozyme 1 OS=Mus musculus GN=Adssl1 PE=2 SV=1;tr|J3QN31|J3QN31_MOUSE Adenylosuccinate synthetase isozyme 1 OS=Mus musculus GN=Adssl1 PE=1 SV=1;sp|P28650|PURA1_MOUSE Adenylosuccinate synthetase isozyme 1 OS	3	14	14	13	39.4	50.254		332760000	28658000	25277000	20528000	38721000	34147000	60899000	31523000	44027000	48983000
J3QNU6;Q8BWG8;E0CYB1;E0CY53	tr|J3QNU6|J3QNU6_MOUSE Beta-arrestin-1 OS=Mus musculus GN=Arrb1 PE=1 SV=1;sp|Q8BWG8|ARRB1_MOUSE Beta-arrestin-1 OS=Mus musculus GN=Arrb1 PE=1 SV=1;tr|E0CYB1|E0CYB1_MOUSE Beta-arrestin-1 (Fragment) OS=Mus musculus GN=Arrb1 PE=1 SV=1;tr|E0CY53|E0CY53_MOUSE B	4	3	2	2	8.6	47.106		8385900	0	756750	781480	2083800	1647700	1126400	982920	1006900	0
Q0VG47;J3QNY1;Q6PFA7;B2RXM2;Q5U3M2;Q58E39;A2AL13;V9GX38	tr|Q0VG47|Q0VG47_MOUSE Heterogeneous nuclear ribonucleoprotein A3 OS=Mus musculus GN=Hnrnpa3 PE=2 SV=1;tr|J3QNY1|J3QNY1_MOUSE Predicted pseudogene 9242 OS=Mus musculus GN=Gm9242 PE=4 SV=1;tr|Q6PFA7|Q6PFA7_MOUSE Hnrpa3 protein (Fragment) OS=Mus musculus GN=	8	10	10	1	33.3	37.086		1169000000	102640000	26809000	27054000	140930000	179290000	216090000	164950000	166350000	144830000
J3QP56;P97823;D3YUG4;Q4FK51;D3Z269;D3Z111	tr|J3QP56|J3QP56_MOUSE Acyl-protein thioesterase 1 OS=Mus musculus GN=Lypla1 PE=1 SV=1;sp|P97823|LYPA1_MOUSE Acyl-protein thioesterase 1 OS=Mus musculus GN=Lypla1 PE=1 SV=1;tr|D3YUG4|D3YUG4_MOUSE Acyl-protein thioesterase 1 (Fragment) OS=Mus musculus GN=Ly	6	3	3	3	17	23.726		318360000	9093200	11807000	16717000	74041000	88773000	4422000	54618000	8454300	50434000
J3QP71;K3W4Q8;O55108;O55107;P18572	tr|J3QP71|J3QP71_MOUSE Basigin (Fragment) OS=Mus musculus GN=Bsg PE=1 SV=1;tr|K3W4Q8|K3W4Q8_MOUSE Basigin OS=Mus musculus GN=Bsg PE=1 SV=1;tr|O55108|O55108_MOUSE Basigin (Fragment) OS=Mus musculus GN=Bsg PE=1 SV=1;tr|O55107|O55107_MOUSE Basigin (Fragment)	5	2	2	2	11.7	21.602		58162000	9321500	8393700	4867400	3153800	4042500	3988300	7212400	8145900	9036400
J3QPB5;Q8VCB1	tr|J3QPB5|J3QPB5_MOUSE Nucleoporin NDC1 OS=Mus musculus GN=Ndc1 PE=1 SV=1;sp|Q8VCB1|NDC1_MOUSE Nucleoporin NDC1 OS=Mus musculus GN=Ndc1 PE=1 SV=1	2	1	1	1	3.9	60.299		3072900	396050	0	525050	297330	299760	0	631880	416470	506410
K3W4R2;Q6URW6;A0A140LI60	tr|K3W4R2|K3W4R2_MOUSE Myosin-14 OS=Mus musculus GN=Myh14 PE=1 SV=1;sp|Q6URW6|MYH14_MOUSE Myosin-14 OS=Mus musculus GN=Myh14 PE=1 SV=1;tr|A0A140LI60|A0A140LI60_MOUSE Myosin-14 (Fragment) OS=Mus musculus GN=Myh14 PE=1 SV=1	3	8	2	2	3.8	228.56		26903000	2011700	1569200	2750400	2819000	2899000	3578400	4646500	3521600	3107400
Q8BPG5;K7Q7T7;Q3TLP8;P63001;Q9D859;Q8C4N8;Q14A12;P60764;A2AC13;Q8QZS2	tr|Q8BPG5|Q8BPG5_MOUSE Uncharacterized protein OS=Mus musculus GN=Rac1 PE=2 SV=1;tr|K7Q7T7|K7Q7T7_MOUSE RAS-related C3 botulinum substrate 1 OS=Mus musculus GN=Rac1 PE=1 SV=1;tr|Q3TLP8|Q3TLP8_MOUSE RAS-related C3 botulinum substrate 1, isoform CRA_a OS=Mus	10	8	3	3	49.5	21.424		906190000	83779000	97322000	201580000	64819000	76305000	103720000	105040000	74818000	98797000
Q8R1G5;Q3TYX5;L7N466	tr|Q8R1G5|Q8R1G5_MOUSE 5-formyltetrahydrofolate cyclo-ligase OS=Mus musculus GN=Mthfsl PE=1 SV=1;tr|Q3TYX5|Q3TYX5_MOUSE 5-formyltetrahydrofolate cyclo-ligase OS=Mus musculus GN=Mthfs PE=2 SV=1;tr|L7N466|L7N466_MOUSE 5-formyltetrahydrofolate cyclo-ligase OS	3	1	1	1	8.2	16.694		20549000	5604100	5651600	9293800	0	0	0	0	0	0
Q2TBF9;M0QWC2;Q9CQV6	tr|Q2TBF9|Q2TBF9_MOUSE Microtubule-associated protein 1 light chain 3 beta OS=Mus musculus GN=Map1lc3b PE=2 SV=1;tr|M0QWC2|M0QWC2_MOUSE MCG14171, isoform CRA_b OS=Mus musculus GN=Map1lc3b PE=1 SV=1;sp|Q9CQV6|MLP3B_MOUSE Microtubule-associated proteins 1A/1	3	1	1	1	11.2	14.665		16153000	0	0	0	3147800	6010300	4381600	1231600	0	1381700
M0QWS4;Q9CR09	tr|M0QWS4|M0QWS4_MOUSE Ubiquitin-fold modifier conjugating enzyme 1, isoform CRA_c OS=Mus musculus GN=Ufc1 PE=1 SV=1;sp|Q9CR09|UFC1_MOUSE Ubiquitin-fold modifier-conjugating enzyme 1 OS=Mus musculus GN=Ufc1 PE=1 SV=1	2	1	1	1	9.7	11.351		75204000	7522300	12899000	19134000	4943700	5902900	8418600	5015800	5257400	6110800
O08553;D3YUS0;Q3TAS8;Q3TT92;Q3TXY0;E9PWE8;Q6P1J1;Q62188;P97427	sp|O08553|DPYL2_MOUSE Dihydropyrimidinase-related protein 2 OS=Mus musculus GN=Dpysl2 PE=1 SV=2	9	4	4	4	10.1	62.277		5692300	1115600	705190	1153900	0	683180	879320	612770	542380	0
O08582	sp|O08582|GTPB1_MOUSE GTP-binding protein 1 OS=Mus musculus GN=Gtpbp1 PE=1 SV=2	1	4	4	4	6.4	72.3		12602000	1069400	756870	1238500	1139200	1588200	1652200	1700400	1572100	1884800
O08583;Q4KL64;G3X9I4;D9J342;Q9JJW6	sp|O08583|THOC4_MOUSE THO complex subunit 4 OS=Mus musculus GN=Alyref PE=1 SV=3	5	5	5	5	25.1	26.94		240140000	12540000	6851800	8396400	26338000	46601000	66264000	17033000	29179000	26934000
Q58E65;Q3UI33;O08663;Q3TMN1;M0QWM9;M0QW69;Q3TMZ6;M0QW48;M0QWX0	tr|Q58E65|Q58E65_MOUSE Methionine aminopeptidase 2 OS=Mus musculus GN=Metap2 PE=1 SV=1;tr|Q3UI33|Q3UI33_MOUSE Methionine aminopeptidase 2 OS=Mus musculus GN=Metap2 PE=1 SV=1;sp|O08663|MAP2_MOUSE Methionine aminopeptidase 2 OS=Mus musculus GN=Metap2 PE=1 SV	9	8	8	8	22	52.921		29497000	1650500	662860	0	3228900	4498300	5328700	2967800	5574600	5584800
O08692	sp|O08692|NGP_MOUSE Neutrophilic granule protein OS=Mus musculus GN=Ngp PE=1 SV=1	1	15	15	15	71.9	19.331		25829000000	3366600000	2660200000	1956100000	1364000000	1168500000	1670600000	4029100000	4330500000	5283000000
Q53ZU7;O08709;Q6GT24;D3Z0Y2;Q6A0D0;Q8BPD3;Q8BG37;A0A0A6YXQ7	tr|Q53ZU7|Q53ZU7_MOUSE Peroxiredoxin 6 OS=Mus musculus GN=Prdx6 PE=2 SV=1;sp|O08709|PRDX6_MOUSE Peroxiredoxin-6 OS=Mus musculus GN=Prdx6 PE=1 SV=3;tr|Q6GT24|Q6GT24_MOUSE Peroxiredoxin-6 OS=Mus musculus GN=Prdx6 PE=1 SV=1;tr|D3Z0Y2|D3Z0Y2_MOUSE Peroxiredoxi	8	13	13	13	67	24.87		914180000	106650000	77934000	74905000	101290000	93900000	136400000	92587000	111320000	119190000
O08734;F7CUQ1;Q91WX5	sp|O08734|BAK_MOUSE Bcl-2 homologous antagonist/killer OS=Mus musculus GN=Bak1 PE=1 SV=3;tr|F7CUQ1|F7CUQ1_MOUSE Bcl-2 homologous antagonist/killer (Fragment) OS=Mus musculus GN=Bak1 PE=1 SV=1;tr|Q91WX5|Q91WX5_MOUSE Bak1 protein OS=Mus musculus GN=Bak1 PE=1	3	2	2	2	8.6	23.294		9361000	1563000	0	2429400	0	0	2681900	0	0	2686700
Q3TIE8;O08749	tr|Q3TIE8|Q3TIE8_MOUSE Dihydrolipoyl dehydrogenase OS=Mus musculus GN=Dld PE=2 SV=1;sp|O08749|DLDH_MOUSE Dihydrolipoyl dehydrogenase, mitochondrial OS=Mus musculus GN=Dld PE=1 SV=2	2	4	4	4	11	54.598		37575000	3123800	5108900	6273400	3192300	2622600	4799900	3831400	3969800	4652900
Q3U518;Q3TWG2;O08795	tr|Q3U518|Q3U518_MOUSE Protein kinase C substrate 80K-H, isoform CRA_b OS=Mus musculus GN=Prkcsh PE=2 SV=1;tr|Q3TWG2|Q3TWG2_MOUSE Uncharacterized protein OS=Mus musculus GN=Prkcsh PE=2 SV=1;sp|O08795|GLU2B_MOUSE Glucosidase 2 subunit beta OS=Mus musculus G	3	7	7	7	15.7	58.792		111750000	11269000	11718000	11239000	12559000	11574000	16893000	9173400	14816000	12508000
O08915;D3YW40	sp|O08915|AIP_MOUSE AH receptor-interacting protein OS=Mus musculus GN=Aip PE=1 SV=1	2	4	4	4	17	37.605		45270000	4120900	5233600	4994300	4595500	4850400	5669300	5212500	4188200	6404800
Q540I4;O08917;Q3TJS0;G3UYU4;G3UZZ5;G3UWW8;Q6Y9S2;G3XA73	tr|Q540I4|Q540I4_MOUSE Flotillin 1 OS=Mus musculus GN=Flot1 PE=1 SV=1;sp|O08917|FLOT1_MOUSE Flotillin-1 OS=Mus musculus GN=Flot1 PE=1 SV=1;tr|Q3TJS0|Q3TJS0_MOUSE Uncharacterized protein OS=Mus musculus GN=Flot1 PE=2 SV=1;tr|G3UYU4|G3UYU4_MOUSE Flotillin-1	8	12	12	12	37.4	47.513		75336000	6645700	2907400	8848500	3557300	12179000	9273000	11783000	10342000	9800200
Q3UC68;Q3TXC7;Q3TWV1;Q3TMX0;O88601;Q3UBE4;Q3UB97;Q3U6J5;O08992;A2AKJ9;A2AKJ6;H3BLG5;Q3U902;Q3U6Q3;Q3TET7;Q3U724;A2AKJ5	tr|Q3UC68|Q3UC68_MOUSE Uncharacterized protein OS=Mus musculus GN=Sdcbp PE=2 SV=1;tr|Q3TXC7|Q3TXC7_MOUSE Uncharacterized protein OS=Mus musculus GN=Sdcbp PE=2 SV=1;tr|Q3TWV1|Q3TWV1_MOUSE Uncharacterized protein OS=Mus musculus GN=Sdcbp PE=2 SV=1;tr|Q3TMX0|	17	3	3	3	13.1	32.255		50296000	6901800	8324600	9061400	5204300	4722300	2876300	4063700	3741400	5400100
O08997	sp|O08997|ATOX1_MOUSE Copper transport protein ATOX1 OS=Mus musculus GN=Atox1 PE=1 SV=1	1	3	3	3	58.8	7.3384		396230000	44549000	34644000	40969000	44975000	42479000	56797000	39131000	39352000	53338000
Q9JM79;Q9DCS8;Q3U7H1;Q3TDT8;O09043	tr|Q9JM79|Q9JM79_MOUSE Aspartic proteinase family member similar to renin OS=Mus musculus GN=Napsa PE=2 SV=1;tr|Q9DCS8|Q9DCS8_MOUSE Uncharacterized protein OS=Mus musculus GN=Napsa PE=2 SV=1;tr|Q3U7H1|Q3U7H1_MOUSE Uncharacterized protein OS=Mus musculus GN	5	1	1	1	2.1	45.5		41015000	3496300	0	1178100	3805800	4328400	6636200	9473600	5639900	6457000
Q6RI64;O09061	tr|Q6RI64|Q6RI64_MOUSE Proteasome subunit beta type OS=Mus musculus GN=Psmb1 PE=1 SV=1;sp|O09061|PSB1_MOUSE Proteasome subunit beta type-1 OS=Mus musculus GN=Psmb1 PE=1 SV=1	2	5	5	5	30	26.372		337090000	31171000	9090900	9685800	36072000	38228000	56251000	57070000	38136000	61380000
Q58E49;O09106;D3YYI8	tr|Q58E49|Q58E49_MOUSE Histone deacetylase OS=Mus musculus GN=Hdac1 PE=2 SV=1;sp|O09106|HDAC1_MOUSE Histone deacetylase 1 OS=Mus musculus GN=Hdac1 PE=1 SV=1;tr|D3YYI8|D3YYI8_MOUSE Histone deacetylase OS=Mus musculus GN=Gm10093 PE=3 SV=1	3	5	3	3	12.4	55.074		22691000	2244400	0	0	1621500	2573400	4907800	4242700	2085900	5014900
Q5SWN9;Q3UDI2;Q3TX82;Q3TLX7;Q3TJG7;O09110;P70273;A0A0R4J1Q6;Q60521;Q8C371;A2AGS2;Q3UU57;Q8BP44;Q543Z5;P70236	tr|Q5SWN9|Q5SWN9_MOUSE Uncharacterized protein OS=Mus musculus GN=Map2k3 PE=2 SV=1;tr|Q3UDI2|Q3UDI2_MOUSE Uncharacterized protein OS=Mus musculus GN=Map2k3 PE=2 SV=1;tr|Q3TX82|Q3TX82_MOUSE Uncharacterized protein OS=Mus musculus GN=Map2k3 PE=2 SV=1;tr|Q3TL	15	2	2	2	6.9	39.296		2740200	0	1109000	0	0	0	768890	0	0	862270
O09130	sp|O09130|NF2IP_MOUSE NFATC2-interacting protein OS=Mus musculus GN=Nfatc2ip PE=1 SV=1	1	3	3	3	14.1	45.121		8048400	557780	1545900	2169300	0	1262400	856920	592090	282980	781020
O09131;D3Z1Q9;Q9D2J1;Q9D2S1;Q8BW12;Q8K2Q2	sp|O09131|GSTO1_MOUSE Glutathione S-transferase omega-1 OS=Mus musculus GN=Gsto1 PE=1 SV=2	6	5	5	5	20	27.497		283300000	69344000	11994000	13112000	6810300	5346000	9439200	44985000	57374000	64891000
O35075	sp|O35075|DSCR3_MOUSE Down syndrome critical region protein 3 homolog OS=Mus musculus GN=Dscr3 PE=1 SV=1	1	1	1	1	4	32.97		3127300	394950	0	0	476730	377620	584790	827160	466060	0
Q3V235;O35129;F6Q8V7;F6QPR1;Q3V2V2	tr|Q3V235|Q3V235_MOUSE Prohibitin 2 OS=Mus musculus GN=Phb2 PE=1 SV=1;sp|O35129|PHB2_MOUSE Prohibitin-2 OS=Mus musculus GN=Phb2 PE=1 SV=1;tr|F6Q8V7|F6Q8V7_MOUSE Prohibitin-2 (Fragment) OS=Mus musculus GN=Phb2 PE=1 SV=1;tr|F6QPR1|F6QPR1_MOUSE Prohibitin-2 (	5	7	7	7	27.1	33.296		151240000	9117100	2794800	2397000	10518000	10724000	19366000	42902000	12555000	40870000
Q3UNI8;O35215;G3UZN1;G3UYJ7	tr|Q3UNI8|Q3UNI8_MOUSE D-dopachrome tautomerase OS=Mus musculus GN=Ddt PE=1 SV=1;sp|O35215|DOPD_MOUSE D-dopachrome decarboxylase OS=Mus musculus GN=Ddt PE=1 SV=3;tr|G3UZN1|G3UZN1_MOUSE D-dopachrome decarboxylase OS=Mus musculus GN=Ddt PE=1 SV=1;tr|G3UYJ7|G	4	4	4	4	39	13.077		52146000	4015400	6053500	7800900	4408500	4527800	6009600	4859700	5565100	8905100
Q9CY29;Q3ULG4;O35226;F7AI87	tr|Q9CY29|Q9CY29_MOUSE Uncharacterized protein OS=Mus musculus GN=Psmd4 PE=2 SV=1;tr|Q3ULG4|Q3ULG4_MOUSE Uncharacterized protein OS=Mus musculus GN=Psmd4 PE=2 SV=1;sp|O35226|PSMD4_MOUSE 26S proteasome non-ATPase regulatory subunit 4 OS=Mus musculus GN=Psmd	4	5	5	5	14.1	40.042		68578000	4887200	12503000	13050000	7798600	4090400	5749400	9776700	4571800	6151600
Q3UKJ6;Q3TFE5;O35286;Q497W9;A0A0G2JG10;Q3UDX4;A0A0G2JGQ5;Q3THD5;Q05BH3;Q80TX4;Q921Y1;G3X8X0	tr|Q3UKJ6|Q3UKJ6_MOUSE DEAH (Asp-Glu-Ala-His) box polypeptide 15, isoform CRA_a OS=Mus musculus GN=Dhx15 PE=1 SV=1;tr|Q3TFE5|Q3TFE5_MOUSE Uncharacterized protein OS=Mus musculus GN=Dhx15 PE=2 SV=1;sp|O35286|DHX15_MOUSE Pre-mRNA-splicing factor ATP-dependen	12	19	19	18	27.4	91.006		115930000	10686000	10124000	13766000	11424000	12109000	14316000	12125000	14944000	16434000
O35295;Q8BQK8;Q3UTJ8	sp|O35295|PURB_MOUSE Transcriptional activator protein Pur-beta OS=Mus musculus GN=Purb PE=1 SV=3	3	4	4	4	21	33.901		134240000	48568000	53630000	4101700	978780	5894700	15477000	0	1413900	4175900
Q543M7;O35344;Q9CT07	tr|Q543M7|Q543M7_MOUSE Importin subunit alpha OS=Mus musculus GN=Kpna3 PE=1 SV=1;sp|O35344|IMA4_MOUSE Importin subunit alpha-4 OS=Mus musculus GN=Kpna3 PE=1 SV=1;tr|Q9CT07|Q9CT07_MOUSE Uncharacterized protein (Fragment) OS=Mus musculus GN=Kpna3 PE=2 SV=1	3	3	3	2	6	57.772		50571000	4705400	6250800	4763200	5019000	6536100	7052900	5150500	5479000	5613600
Q8C2J1;Q80Y25;Q3UDG8;Q3TI07;O35350;Q3TB79;Q3UF24	tr|Q8C2J1|Q8C2J1_MOUSE Uncharacterized protein OS=Mus musculus GN=Capn1 PE=2 SV=1;tr|Q80Y25|Q80Y25_MOUSE Capn1 protein OS=Mus musculus GN=Capn1 PE=2 SV=1;tr|Q3UDG8|Q3UDG8_MOUSE Uncharacterized protein OS=Mus musculus GN=Capn1 PE=2 SV=1;tr|Q3TI07|Q3TI07_MOU	7	25	25	25	42.8	82.151		210480000	18074000	11952000	12347000	24880000	24303000	35538000	22951000	26690000	33746000
Q69ZD1;O35382;Q8CEG7;Q8CA11;Q9CWI0;Q8CAQ9;Q8C391;Q9CXE1	tr|Q69ZD1|Q69ZD1_MOUSE MKIAA1699 protein (Fragment) OS=Mus musculus GN=Exoc4 PE=2 SV=1;sp|O35382|EXOC4_MOUSE Exocyst complex component 4 OS=Mus musculus GN=Exoc4 PE=1 SV=2;tr|Q8CEG7|Q8CEG7_MOUSE Uncharacterized protein OS=Mus musculus GN=Exoc4 PE=2 SV=1;tr	8	3	3	3	4	110.77		1768200	0	152330	0	190630	90019	301170	400320	103560	530170
O35459;F7B227	sp|O35459|ECH1_MOUSE Delta(3,5)-Delta(2,4)-dienoyl-CoA isomerase, mitochondrial OS=Mus musculus GN=Ech1 PE=1 SV=1;tr|F7B227|F7B227_MOUSE Delta(3,5)-Delta(2,4)-dienoyl-CoA isomerase, mitochondrial (Fragment) OS=Mus musculus GN=Ech1 PE=1 SV=1	2	4	4	4	13.5	36.118		10548000	1459500	783220	1394500	1241300	1086300	1913000	707860	967220	995060
Q4FK25;Q3TAR7;P28076;O35522;Q3U7A7;A0A0R4J256;G3UYK5	tr|Q4FK25|Q4FK25_MOUSE Proteasome subunit beta type OS=Mus musculus GN=Psmb9 PE=2 SV=1;tr|Q3TAR7|Q3TAR7_MOUSE Proteasome subunit beta type OS=Mus musculus GN=Psmb9 PE=2 SV=1;sp|P28076|PSB9_MOUSE Proteasome subunit beta type-9 OS=Mus musculus GN=Psmb9 PE=1	7	4	4	4	18.7	23.396		284920000	33772000	32858000	29802000	38927000	15130000	35759000	29363000	25369000	43940000
Q9CSU2;Q3UD26;O35593	tr|Q9CSU2|Q9CSU2_MOUSE Uncharacterized protein (Fragment) OS=Mus musculus GN=Psmd14 PE=2 SV=1;tr|Q3UD26|Q3UD26_MOUSE Uncharacterized protein OS=Mus musculus GN=Psmd14 PE=2 SV=1;sp|O35593|PSDE_MOUSE 26S proteasome non-ATPase regulatory subunit 14 OS=Mus mus	3	2	2	2	7.7	28.772		46417000	4102900	2154400	3808400	5363000	5994300	7888200	6071100	5044600	5990300
O35598;E9PYF2;D3Z1E6;Q6NZC0	sp|O35598|ADA10_MOUSE Disintegrin and metalloproteinase domain-containing protein 10 OS=Mus musculus GN=Adam10 PE=1 SV=2;tr|E9PYF2|E9PYF2_MOUSE Disintegrin and metalloproteinase domain-containing protein 10 OS=Mus musculus GN=Adam10 PE=1 SV=1	4	4	4	4	6.5	83.967		6741800	602350	604890	1573500	384840	1299900	466760	1237300	572200	0
Q8C1X9;Q3U737;O35639;Q3TLP4;Q3TFK4;Q3TET3;A0A0G2JGL7	tr|Q8C1X9|Q8C1X9_MOUSE Annexin OS=Mus musculus GN=Anxa3 PE=2 SV=1;tr|Q3U737|Q3U737_MOUSE Annexin OS=Mus musculus GN=Anxa3 PE=2 SV=1;sp|O35639|ANXA3_MOUSE Annexin A3 OS=Mus musculus GN=Anxa3 PE=1 SV=4;tr|Q3TLP4|Q3TLP4_MOUSE Annexin OS=Mus musculus GN=Anxa3	7	17	17	13	47.7	36.356		1490400000	153780000	117480000	134160000	156710000	171760000	204220000	169820000	183050000	199410000
Q5SVG5;Q5SVG4;Q3TVN4;O35643;Q8CC13;Q3U1K9;Q6NXY3	tr|Q5SVG5|Q5SVG5_MOUSE AP complex subunit beta OS=Mus musculus GN=Ap1b1 PE=1 SV=1;tr|Q5SVG4|Q5SVG4_MOUSE AP complex subunit beta OS=Mus musculus GN=Ap1b1 PE=1 SV=1;tr|Q3TVN4|Q3TVN4_MOUSE AP complex subunit beta OS=Mus musculus GN=Ap1b1 PE=2 SV=1;sp|O35643|	7	24	13	13	35	101.19		20779000	1131400	1678900	2168800	2198400	1642400	2924100	4728400	2478000	1828600
O35685	sp|O35685|NUDC_MOUSE Nuclear migration protein nudC OS=Mus musculus GN=Nudc PE=1 SV=1	1	7	7	7	23.5	38.358		67483000	4613000	12358000	7013200	5924900	6649300	7666000	5660800	9743300	7854500
Q3TUQ5;O35691;A0A1W2P6S1;Q9CV89	tr|Q3TUQ5|Q3TUQ5_MOUSE Pinin OS=Mus musculus GN=Pnn PE=1 SV=1;sp|O35691|PININ_MOUSE Pinin OS=Mus musculus GN=Pnn PE=1 SV=4	4	3	3	3	3.7	82.504		6559400	575870	980480	680660	617190	723530	904630	1022700	682730	371670
Q811L7;Q8C2Q7;O35737;Q3TNG9	tr|Q811L7|Q811L7_MOUSE Heterogeneous nuclear ribonucleoprotein H1 OS=Mus musculus GN=Hnrnph1 PE=1 SV=2;tr|Q8C2Q7|Q8C2Q7_MOUSE Heterogeneous nuclear ribonucleoprotein H OS=Mus musculus GN=Hnrnph1 PE=1 SV=1;sp|O35737|HNRH1_MOUSE Heterogeneous nuclear ribonuc	4	9	9	4	26.7	49.199		408810000	33039000	17444000	18220000	48379000	59796000	75392000	50529000	62800000	43217000
O35744;Q91Z98;F6RU51	sp|O35744|CHIL3_MOUSE Chitinase-like protein 3 OS=Mus musculus GN=Chil3 PE=1 SV=2	3	18	18	18	55.5	44.458		2907300000	416270000	364600000	312400000	93927000	101140000	135810000	427420000	507970000	547790000
O35841;Q3UYQ4	sp|O35841|API5_MOUSE Apoptosis inhibitor 5 OS=Mus musculus GN=Api5 PE=1 SV=2;tr|Q3UYQ4|Q3UYQ4_MOUSE Uncharacterized protein OS=Mus musculus GN=Api5 PE=2 SV=1	2	9	9	9	18.7	56.784		98592000	7783000	11334000	10649000	8463200	8530000	13847000	14998000	7618300	15370000
Q8R3X4;O35857	tr|Q8R3X4|Q8R3X4_MOUSE Timm44 protein (Fragment) OS=Mus musculus GN=Timm44 PE=2 SV=1;sp|O35857|TIM44_MOUSE Mitochondrial import inner membrane translocase subunit TIM44 OS=Mus musculus GN=Timm44 PE=1 SV=2	2	2	2	2	5.1	50.888		2629300	0	0	0	405880	493560	633910	401660	230050	464230
O35864	sp|O35864|CSN5_MOUSE COP9 signalosome complex subunit 5 OS=Mus musculus GN=Cops5 PE=1 SV=3	1	2	2	2	7.5	37.548		15590000	1841200	2044300	0	1975200	1226400	2333100	1222900	1657100	3289400
Q3U9X2;Q9ES84;O35901;O35900;Q9EP83	tr|Q3U9X2|Q3U9X2_MOUSE U6 snRNA-associated Sm-like protein LSm2 OS=Mus musculus GN=Lsm2 PE=1 SV=1;tr|Q9ES84|Q9ES84_MOUSE SnRNP core protein SMX5d (Fragment) OS=Mus musculus GN=Lsm2 PE=2 SV=1;tr|O35901|O35901_MOUSE U6 snRNA-associated Sm-like protein LSm2 O	5	3	3	3	51.6	10.834		79341000	6075100	8347300	9842200	5975300	9651800	8422700	12198000	8936900	9892100
Q4FJX8;Q3UNP9;O35955;Q91VC5	tr|Q4FJX8|Q4FJX8_MOUSE Proteasome subunit beta type OS=Mus musculus GN=Psmb10 PE=2 SV=1;tr|Q3UNP9|Q3UNP9_MOUSE Proteasome subunit beta type OS=Mus musculus GN=Psmb10 PE=2 SV=1;sp|O35955|PSB10_MOUSE Proteasome subunit beta type-10 OS=Mus musculus GN=Psmb10	4	2	2	2	11.4	29.118		37116000	4459800	4173900	6000200	4546800	4116000	1405500	3970100	5766100	2678100
O54692	sp|O54692|ZW10_MOUSE Centromere/kinetochore protein zw10 homolog OS=Mus musculus GN=Zw10 PE=1 SV=3	1	3	3	3	5	88.062		4986300	1185800	0	441820	638080	335680	548010	561480	508870	766550
Q3UG68;Q3UC51;O54734	tr|Q3UG68|Q3UG68_MOUSE Dolichyl-diphosphooligosaccharide--protein glycosyltransferase 48 kDa subunit OS=Mus musculus GN=Ddost PE=2 SV=1;tr|Q3UC51|Q3UC51_MOUSE Dolichyl-diphosphooligosaccharide--protein glycosyltransferase 48 kDa subunit OS=Mus musculus GN=	3	5	5	5	10.4	48.985		85468000	7121100	7487700	7767700	8742600	8236600	11389000	14172000	11581000	8971200
Q3UR54;Q8CGH7;Q05CQ3;Q3U237;O54774	tr|Q3UR54|Q3UR54_MOUSE Uncharacterized protein (Fragment) OS=Mus musculus GN=Ap3d1 PE=2 SV=1;tr|Q8CGH7|Q8CGH7_MOUSE Ap3d1 protein (Fragment) OS=Mus musculus GN=Ap3d1 PE=2 SV=1;tr|Q05CQ3|Q05CQ3_MOUSE Ap3d1 protein (Fragment) OS=Mus musculus GN=Ap3d1 PE=2 SV	5	2	2	2	4.5	83.707		3819800	124660	159000	179310	586210	686790	203820	1058500	598020	223470
O54790;Q3UP84;Q3UKW6;Q3U568;Q3U0G5;A0A1S6GWH7;Q61827;O54791	sp|O54790|MAFG_MOUSE Transcription factor MafG OS=Mus musculus GN=Mafg PE=1 SV=1;tr|Q3UP84|Q3UP84_MOUSE V-maf musculoaponeurotic fibrosarcoma oncogene family, protein K (Avian) OS=Mus musculus GN=Mafk PE=1 SV=1;tr|Q3UKW6|Q3UKW6_MOUSE Uncharacterized protei	8	2	2	2	13	17.876		37036000	4306600	2319600	3138200	4143800	4236400	5251000	4780600	4802300	4056900
O54824;Q3UZ81	sp|O54824|IL16_MOUSE Pro-interleukin-16 OS=Mus musculus GN=Il16 PE=1 SV=3;tr|Q3UZ81|Q3UZ81_MOUSE Pro-interleukin-16 OS=Mus musculus GN=Il16 PE=2 SV=1	2	21	21	21	21.2	141.43		115870000	12434000	12128000	15540000	9948500	12272000	13725000	13802000	13394000	12625000
O54941	sp|O54941|SMCE1_MOUSE SWI/SNF-related matrix-associated actin-dependent regulator of chromatin subfamily E member 1 OS=Mus musculus GN=Smarce1 PE=1 SV=1	1	2	2	2	6.8	46.638		15226000	1371400	1476900	1558600	1573800	2110400	1353300	0	2251700	3530000
Q2VPC9;Q3TWR3;O54950	tr|Q2VPC9|Q2VPC9_MOUSE Prkag1 protein (Fragment) OS=Mus musculus GN=Prkag1 PE=2 SV=1;tr|Q3TWR3|Q3TWR3_MOUSE Uncharacterized protein OS=Mus musculus GN=Prkag1 PE=1 SV=1;sp|O54950|AAKG1_MOUSE 5-AMP-activated protein kinase subunit gamma-1 OS=Mus musculus GN	3	2	2	2	7.3	28.308		6366100	509780	1796200	1352800	799530	964050	0	943770	0	0
O54962	sp|O54962|BAF_MOUSE Barrier-to-autointegration factor OS=Mus musculus GN=Banf1 PE=1 SV=1	1	4	4	4	42.7	10.102		304120000	34324000	14510000	13867000	41240000	26275000	62954000	31497000	34371000	45079000
Q8VEI6;O54984;Q8C1Q1	tr|Q8VEI6|Q8VEI6_MOUSE Arsenical pump-driving ATPase OS=Mus musculus GN=Asna1 PE=2 SV=1;sp|O54984|ASNA_MOUSE ATPase Asna1 OS=Mus musculus GN=Asna1 PE=1 SV=2;tr|Q8C1Q1|Q8C1Q1_MOUSE Arsenical pump-driving ATPase OS=Mus musculus GN=Asna1 PE=2 SV=1	3	4	4	4	21.1	24.786		20543000	4173300	4257100	4928400	582060	3101100	385490	0	1330600	1785400
O55029	sp|O55029|COPB2_MOUSE Coatomer subunit beta OS=Mus musculus GN=Copb2 PE=1 SV=2	1	15	15	15	19.1	102.45		64049000	5778100	6242200	5722400	7220900	6212700	9738100	6899600	7935800	8298900
Q7TMG8;Q3TD78;O55126	tr|Q7TMG8|Q7TMG8_MOUSE Glioblastoma amplified sequence OS=Mus musculus GN=Nipsnap2 PE=1 SV=1;tr|Q3TD78|Q3TD78_MOUSE Uncharacterized protein OS=Mus musculus GN=Nipsnap2 PE=2 SV=1;sp|O55126|NIPS2_MOUSE Protein NipSnap homolog 2 OS=Mus musculus GN=Nipsnap2 PE	3	1	1	1	3.2	32.898		15926000	1718700	1320700	1989100	1534000	0	2292500	2047500	2083800	2939300
Q545K4;Q3UBJ6;Q3UA13;Q3U818;O55135;Q9R071;Q3U740;A6PWZ2;D6RG53;D6RJJ3;B1AZQ4	tr|Q545K4|Q545K4_MOUSE Eukaryotic translation initiation factor 6 OS=Mus musculus GN=Eif6 PE=1 SV=1;tr|Q3UBJ6|Q3UBJ6_MOUSE Eukaryotic translation initiation factor 6 OS=Mus musculus GN=Eif6 PE=2 SV=1;tr|Q3UA13|Q3UA13_MOUSE Eukaryotic translation initiation	11	6	6	6	35.1	26.511		149480000	12524000	16402000	17631000	12372000	19393000	17207000	23512000	14768000	15671000
Q9DC85;Q8BQV7;Q6ZWX1;O55142	tr|Q9DC85|Q9DC85_MOUSE Uncharacterized protein OS=Mus musculus GN=Rpl35a PE=2 SV=1;tr|Q8BQV7|Q8BQV7_MOUSE Uncharacterized protein OS=Mus musculus GN=Rpl35a PE=2 SV=1;tr|Q6ZWX1|Q6ZWX1_MOUSE MCG1036414 OS=Mus musculus GN=Rpl35a PE=1 SV=1;sp|O55142|RL35A_MOUS	4	6	6	6	46.4	12.573		1307700000	132920000	171280000	165510000	131870000	86519000	199220000	114070000	131640000	174710000
Q5DTI2;O55143;O54994	tr|Q5DTI2|Q5DTI2_MOUSE ATPase, Ca++ transporting, cardiac muscle, slow twitch 2, isoform CRA_b (Fragment) OS=Mus musculus GN=Atp2a2 PE=2 SV=1;sp|O55143|AT2A2_MOUSE Sarcoplasmic/endoplasmic reticulum calcium ATPase 2 OS=Mus musculus GN=Atp2a2 PE=1 SV=2;tr|O	3	16	11	8	17.4	116.6		33036000	2537400	6727300	3113300	3580000	2869700	4130300	3960800	4600600	1516700
O55201;A0A140LJ34	sp|O55201|SPT5H_MOUSE Transcription elongation factor SPT5 OS=Mus musculus GN=Supt5h PE=1 SV=1;tr|A0A140LJ34|A0A140LJ34_MOUSE Suppressor of Ty 5 (Fragment) OS=Mus musculus GN=Supt5 PE=1 SV=1	2	2	2	2	1.9	120.66		2638900	210870	372630	226090	159450	205980	256530	455900	492780	258630
O55222;D3YZA5;A0A1B0GRF6	sp|O55222|ILK_MOUSE Integrin-linked protein kinase OS=Mus musculus GN=Ilk PE=1 SV=2	3	12	12	12	26.1	51.373		144290000	19659000	15243000	12238000	11219000	11481000	23586000	11550000	19429000	19891000
Q8C209;Q3TD42;Q3TCE6;Q3TAV4;O70138;Q3U1P0;Q8C230	tr|Q8C209|Q8C209_MOUSE Uncharacterized protein OS=Mus musculus GN=Mmp8 PE=2 SV=1;tr|Q3TD42|Q3TD42_MOUSE Uncharacterized protein OS=Mus musculus GN=Mmp8 PE=2 SV=1;tr|Q3TCE6|Q3TCE6_MOUSE Uncharacterized protein OS=Mus musculus GN=Mmp8 PE=2 SV=1;tr|Q3TAV4|Q3T	7	14	14	14	31.8	53.053		335640000	78402000	43839000	46217000	1738900	4821500	1813300	48423000	57339000	53046000
Q1PCS1;O70145;A0A087WPH0;Q3TBY8	tr|Q1PCS1|Q1PCS1_MUSMM Neutrophil cytosolic factor 2 OS=Mus musculus molossinus GN=Ncf2 PE=2 SV=1;sp|O70145|NCF2_MOUSE Neutrophil cytosol factor 2 OS=Mus musculus GN=Ncf2 PE=1 SV=1	4	23	23	23	43.6	59.457		570050000	65564000	42429000	33093000	61563000	55186000	85644000	61915000	73024000	91637000
O70152;A2BDX2;F8WII3	sp|O70152|DPM1_MOUSE Dolichol-phosphate mannosyltransferase subunit 1 OS=Mus musculus GN=Dpm1 PE=1 SV=1;tr|A2BDX2|A2BDX2_MOUSE Dolichol-phosphate mannosyltransferase subunit 1 OS=Mus musculus GN=Dpm1 PE=1 SV=1	3	3	3	3	14.2	29.174		10102000	427810	295830	404080	734090	1520200	3313100	1529800	939540	937440
O70194	sp|O70194|EIF3D_MOUSE Eukaryotic translation initiation factor 3 subunit D OS=Mus musculus GN=Eif3d PE=1 SV=2	1	7	7	7	16.4	63.988		77090000	6263800	5420900	1789800	9079200	9649300	13282000	8921000	10355000	12329000
O70230	sp|O70230|ZN143_MOUSE Zinc finger protein 143 OS=Mus musculus GN=Znf143 PE=1 SV=2	1	1	1	1	1.3	69.04		759700	158800	0	160250	97317	79944	153730	0	109650	0
Q3UK88;Q9EP84;Q792R0;O70296;O70293;Q9EPB9;Q3TTW2;Q3TST4;Q8VEB1	tr|Q3UK88|Q3UK88_MOUSE G protein-coupled receptor kinase OS=Mus musculus GN=Grk6 PE=2 SV=1;tr|Q9EP84|Q9EP84_MOUSE G protein-coupled receptor kinase OS=Mus musculus GN=Grk6 PE=1 SV=1;tr|Q792R0|Q792R0_MOUSE G protein-coupled receptor kinase OS=Mus musculus G	9	3	3	3	6.5	62.152		9381000	2451400	558910	1686500	482820	580750	721760	1682300	681250	535320
Q3UJC3;O70310;F7APP3;A2AJH3;Q3THR4;O70311	tr|Q3UJC3|Q3UJC3_MOUSE Glycylpeptide N-tetradecanoyltransferase OS=Mus musculus GN=Nmt1 PE=1 SV=1;sp|O70310|NMT1_MOUSE Glycylpeptide N-tetradecanoyltransferase 1 OS=Mus musculus GN=Nmt1 PE=1 SV=1	6	6	6	6	14.7	56.888		58199000	4800500	4031500	3758800	6227200	7244600	9939100	5745300	8796400	7655200
O70349;Q8CDP6;Q6NZR5;Q3TW36;G3UYT1;Q8R3X0;Q3TE28	tr|O70349|O70349_MOUSE MCG15924, isoform CRA_a OS=Mus musculus GN=SKI PE=4 SV=1;tr|Q8CDP6|Q8CDP6_MOUSE Uncharacterized protein OS=Mus musculus GN=Skiv2l PE=2 SV=1;tr|Q6NZR5|Q6NZR5_MOUSE Superkiller viralicidic activity 2-like (S. cerevisiae) OS=Mus musculu	7	2	2	2	2.1	136.65		286250	0	0	68587	39333	0	44312	134020	0	0
Q9DCD8;Q58EV4;O70435;Q3TEL1;E0CX62;E0CZ34;F8WH02;E0CYL6	tr|Q9DCD8|Q9DCD8_MOUSE Proteasome subunit alpha type OS=Mus musculus GN=Psma3 PE=2 SV=1;tr|Q58EV4|Q58EV4_MOUSE Proteasome subunit alpha type OS=Mus musculus GN=Psma3 PE=1 SV=1;sp|O70435|PSA3_MOUSE Proteasome subunit alpha type-3 OS=Mus musculus GN=Psma3 PE	8	8	8	8	32.5	28.49		174540000	18187000	22088000	21605000	13629000	12255000	31725000	24160000	12279000	18614000
Q9JMJ6;Q9DCE1;Q8BH40;O70439	tr|Q9JMJ6|Q9JMJ6_MOUSE Syntaxin 7 OS=Mus musculus GN=Stx7 PE=2 SV=1;tr|Q9DCE1|Q9DCE1_MOUSE Uncharacterized protein OS=Mus musculus GN=Stx7 PE=2 SV=1;tr|Q8BH40|Q8BH40_MOUSE Syntaxin-7 OS=Mus musculus GN=Stx7 PE=1 SV=1;sp|O70439|STX7_MOUSE Syntaxin-7 OS=Mus	4	2	2	2	10.7	29.766		50095000	5788600	6903500	8334700	4359500	5064600	7749900	2276200	6814300	2803700
Q9JJ20;O70456	tr|Q9JJ20|Q9JJ20_MOUSE 14-3-3 protein sigma OS=Mus musculus GN=Sfn PE=2 SV=1;sp|O70456|1433S_MOUSE 14-3-3 protein sigma OS=Mus musculus GN=Sfn PE=1 SV=2	2	3	1	1	10.5	27.833		1128400000	141050000	216230000	83848000	134170000	56728000	135220000	98199000	115890000	147120000
Q3U208;Q3TX09;O70469	tr|Q3U208|Q3U208_MOUSE Uncharacterized protein OS=Mus musculus GN=Dok2 PE=2 SV=1;tr|Q3TX09|Q3TX09_MOUSE Uncharacterized protein OS=Mus musculus GN=Dok2 PE=2 SV=1;sp|O70469|DOK2_MOUSE Docking protein 2 OS=Mus musculus GN=Dok2 PE=1 SV=1	3	2	2	2	5.6	45.565		8337300	1278900	0	0	937900	286260	2666400	1513600	860750	793430
Q3UIZ1;Q3TS38;Q3TJ71;O70475;Q3TI06;Q3TJE8;D3YXP9	tr|Q3UIZ1|Q3UIZ1_MOUSE UDP-glucose 6-dehydrogenase OS=Mus musculus GN=Ugdh PE=2 SV=1;tr|Q3TS38|Q3TS38_MOUSE UDP-glucose 6-dehydrogenase OS=Mus musculus GN=Ugdh PE=1 SV=1;tr|Q3TJ71|Q3TJ71_MOUSE UDP-glucose 6-dehydrogenase OS=Mus musculus GN=Ugdh PE=2 SV=1;s	7	5	5	5	13	54.817		15293000	2624300	460550	2641400	1204800	992290	1379000	2136600	1172700	2681600
Q9CU14;Q9CSC2;Q78ZM0;O70492;D3Z6Z0;D3Z789	tr|Q9CU14|Q9CU14_MOUSE Uncharacterized protein (Fragment) OS=Mus musculus GN=Snx3 PE=2 SV=1;tr|Q9CSC2|Q9CSC2_MOUSE Uncharacterized protein (Fragment) OS=Mus musculus GN=Snx3 PE=2 SV=1;tr|Q78ZM0|Q78ZM0_MOUSE Sorting nexin 3, isoform CRA_b OS=Mus musculus GN	6	5	5	4	37.1	15.417		185050000	28720000	24196000	30458000	23888000	12758000	21780000	15294000	14143000	13812000
Q6ZWQ5;Q3TGS7;Q3V2H3;O70493;Q99M52	tr|Q6ZWQ5|Q6ZWQ5_MOUSE Sorting nexin 12, isoform CRA_c OS=Mus musculus GN=Snx12 PE=1 SV=1;tr|Q3TGS7|Q3TGS7_MOUSE Sorting nexin 12, isoform CRA_b OS=Mus musculus GN=Snx12 PE=1 SV=1;tr|Q3V2H3|Q3V2H3_MOUSE Sorting nexin-12 OS=Mus musculus GN=Snx12 PE=1 SV=1;s	5	3	2	2	16.7	18.884		137370000	15872000	7948000	6214900	15072000	18971000	16899000	17813000	15582000	22995000
Q3U9R5;O70497;B2FDG6	tr|Q3U9R5|Q3U9R5_MOUSE Ficolin B OS=Mus musculus GN=Fcnb PE=1 SV=1;sp|O70497|FCN2_MOUSE Ficolin-2 OS=Mus musculus GN=Fcn2 PE=2 SV=2	3	3	3	3	11.5	26.929		19821000	4069700	4497400	3374500	0	0	0	2416400	2537100	2925700
Q0VGQ1;O70503;Q8BPF1	tr|Q0VGQ1|Q0VGQ1_MOUSE Hydroxysteroid (17-beta) dehydrogenase 12 OS=Mus musculus GN=Hsd17b12 PE=2 SV=1;sp|O70503|DHB12_MOUSE Very-long-chain 3-oxoacyl-CoA reductase OS=Mus musculus GN=Hsd17b12 PE=1 SV=1;tr|Q8BPF1|Q8BPF1_MOUSE Uncharacterized protein OS=Mus	3	2	2	2	5.4	34.741		26125000	616440	1810600	1202000	6052200	0	8578400	2866600	4998800	0
O70569;P62264;D3YVF4;D3Z7I1;Q3UJS5	tr|O70569|O70569_MOUSE Ribosomal protein S14 OS=Mus musculus GN=rps14 PE=3 SV=1;sp|P62264|RS14_MOUSE 40S ribosomal protein S14 OS=Mus musculus GN=Rps14 PE=1 SV=3;tr|D3YVF4|D3YVF4_MOUSE 40S ribosomal protein S14 (Fragment) OS=Mus musculus GN=Rps14 PE=1 SV=1	5	5	5	5	36.4	16.301		1647800000	183230000	207170000	241950000	111240000	187420000	170440000	182960000	189900000	173470000
O70591;F8WJ30	sp|O70591|PFD2_MOUSE Prefoldin subunit 2 OS=Mus musculus GN=Pfdn2 PE=1 SV=2;tr|F8WJ30|F8WJ30_MOUSE Prefoldin subunit 2 (Fragment) OS=Mus musculus GN=Pfdn2 PE=1 SV=1	2	3	3	3	23.4	16.534		55400000	6463200	7226100	5532400	4750000	6410200	8349700	4048200	5945200	6674600
Q8R3Y0;Q31167;O78207;W5XQG0;Q792Z7;P01899;P01897;K7X379;Q31168;Q3KQJ3;O19467;Q569W0;Q31149;O19453;Q61892;Q61896;P79569;Q61643;Q31151;O78206;E9PWT4;E9QJR9;P79568;P79567;Q95H92;Q52PG7;Q66JR0;E9PX63;Q31141;Q95457;Q31215;Q61895;A7VMS6;O19441;Q31172;E9Q0G4;G3UXE9;P14430;P14429;P14426;B0I563;F6VXI7;A0A0B4J1G3;Q66JU6;Q0WXH4;Q61641;Q31145;Q4VCP2;Q921P3;Q4VCN4;A7VMS5;K7WBQ4;H3BJA9;Q31152;H3BK58;Q31153;Q61…	tr|Q8R3Y0|Q8R3Y0_MOUSE H2-D1 protein (Fragment) OS=Mus musculus GN=H2-D1 PE=2 SV=1;tr|Q31167|Q31167_MOUSE H-2D cell surface glycoprotein (Fragment) OS=Mus musculus GN=H2-D1 PE=2 SV=1;tr|O78207|O78207_MOUSE H-2D cell surface glycoprotein (Fragment) OS=Mus m	124	8	5	1	25.9	37.672		35472000	2470600	2603200	3298200	1476200	2380200	2964500	6741600	5057800	8479300
Q3TE06;Q3TJY2;Q80ZI9;O88342;Q9DBM8;Q3TNK2;Q9DC08;Q3U136	tr|Q3TE06|Q3TE06_MOUSE Uncharacterized protein (Fragment) OS=Mus musculus GN=Wdr1 PE=2 SV=1;tr|Q3TJY2|Q3TJY2_MOUSE WD repeat domain 1 OS=Mus musculus GN=Wdr1 PE=1 SV=1;tr|Q80ZI9|Q80ZI9_MOUSE WD repeat domain 1 (Fragment) OS=Mus musculus GN=Wdr1 PE=2 SV=1;s	8	19	19	11	38.3	63.42		805340000	77481000	71517000	76920000	104020000	79075000	151210000	84177000	75468000	85467000
Q6NZM8;O88428;Q60967	tr|Q6NZM8|Q6NZM8_MOUSE 3-phosphoadenosine 5-phosphosulfate synthase 1, isoform CRA_a OS=Mus musculus GN=Papss1 PE=1 SV=1;sp|O88428|PAPS2_MOUSE Bifunctional 3-phosphoadenosine 5-phosphosulfate synthase 2 OS=Mus musculus GN=Papss2 PE=1 SV=2;sp|Q60967|PAP	3	1	1	1	2.3	68.494		1810100	0	0	327180	0	448940	625120	0	408880	0
Q8R378;O88520	tr|Q8R378|Q8R378_MOUSE Shoc2 protein OS=Mus musculus GN=Shoc2 PE=2 SV=1;sp|O88520|SHOC2_MOUSE Leucine-rich repeat protein SHOC-2 OS=Mus musculus GN=Shoc2 PE=1 SV=2	2	1	1	1	2.5	58.493		7200500	617280	625550	876160	478410	583290	770550	1168100	756740	1324400
Q3TEL0;Q3UB92;Q3U6W3;Q3U6J9;Q3TAR8;Q8VBX5;O88531	tr|Q3TEL0|Q3TEL0_MOUSE Uncharacterized protein OS=Mus musculus GN=Ppt1 PE=2 SV=1;tr|Q3UB92|Q3UB92_MOUSE Uncharacterized protein OS=Mus musculus GN=Ppt1 PE=2 SV=1;tr|Q3U6W3|Q3U6W3_MOUSE Uncharacterized protein OS=Mus musculus GN=Ppt1 PE=2 SV=1;tr|Q3U6J9|Q3U	7	1	1	1	5	34.154		4944400	1004000	1762900	2177500	0	0	0	0	0	0
O88536;O08790	sp|O88536|FPR2_MOUSE Formyl peptide receptor 2 OS=Mus musculus GN=Fpr2 PE=1 SV=1	2	4	4	4	16.2	39.422		81662000	626990	5290500	666490	10296000	14407000	11570000	10320000	10680000	17805000
Q3UQL2;O88543;Q8BX58;D3Z036;Q3TEA5;F6YCA7	tr|Q3UQL2|Q3UQL2_MOUSE Uncharacterized protein OS=Mus musculus GN=Cops3 PE=1 SV=1;sp|O88543|CSN3_MOUSE COP9 signalosome complex subunit 3 OS=Mus musculus GN=Cops3 PE=1 SV=3;tr|Q8BX58|Q8BX58_MOUSE Uncharacterized protein OS=Mus musculus PE=2 SV=1	6	5	5	5	14.9	47.832		30031000	1580500	2431600	4309300	2518200	2963300	4712100	3934600	3678100	3903700
Q14AI7;O88544;Q3TIJ1;F6QTS1;D3Z1R9;D3YV99	tr|Q14AI7|Q14AI7_MOUSE COP9 (Constitutive photomorphogenic) homolog, subunit 4 (Arabidopsis thaliana) OS=Mus musculus GN=Cops4 PE=1 SV=1;sp|O88544|CSN4_MOUSE COP9 signalosome complex subunit 4 OS=Mus musculus GN=Cops4 PE=1 SV=1;tr|Q3TIJ1|Q3TIJ1_MOUSE Uncha	6	7	7	7	19	46.284		35354000	4718600	5158500	3319700	3389300	4461300	2999700	3400600	4758300	3148200
O88569;B7ZP22;A0A0N4SUM2	sp|O88569|ROA2_MOUSE Heterogeneous nuclear ribonucleoproteins A2/B1 OS=Mus musculus GN=Hnrnpa2b1 PE=1 SV=2;tr|B7ZP22|B7ZP22_MOUSE Heterogeneous nuclear ribonucleoprotein A2/B1 OS=Mus musculus GN=Hnrnpa2b1 PE=2 SV=1	3	17	17	16	56.7	37.402		2490500000	213480000	228800000	187760000	229300000	236380000	383450000	283890000	357380000	370090000
Q4FK86;O88593	tr|Q4FK86|Q4FK86_MOUSE Peptidoglycan-recognition protein OS=Mus musculus GN=Pglyrp1 PE=1 SV=1;sp|O88593|PGRP1_MOUSE Peptidoglycan recognition protein 1 OS=Mus musculus GN=Pglyrp1 PE=1 SV=1	2	2	2	2	11.5	20.489		946680000	145900000	156920000	157600000	2530400	0	3967100	141320000	148230000	190200000
Q7TMQ0;O88627;Q6P8I9;E9PXX9;A2AWR5	tr|Q7TMQ0|Q7TMQ0_MOUSE Sodium/nucleoside cotransporter OS=Mus musculus GN=Slc28a2 PE=2 SV=1;sp|O88627|S28A2_MOUSE Sodium/nucleoside cotransporter 2 OS=Mus musculus GN=Slc28a2 PE=1 SV=2;tr|Q6P8I9|Q6P8I9_MOUSE Sodium/nucleoside cotransporter OS=Mus musculus	5	2	2	2	2.9	72.858		6268100	0	766380	0	915250	0	1254800	772190	1689700	869760
Q542I7;Q3TX23;O88653	tr|Q542I7|Q542I7_MOUSE MCG121084 OS=Mus musculus GN=Lamtor3 PE=1 SV=1;tr|Q3TX23|Q3TX23_MOUSE Uncharacterized protein OS=Mus musculus GN=Lamtor3 PE=2 SV=1;sp|O88653|LTOR3_MOUSE Ragulator complex protein LAMTOR3 OS=Mus musculus GN=Lamtor3 PE=1 SV=1	3	1	1	1	8.9	13.553		20298000	2016000	0	0	2352500	3322900	3548000	2968700	3317400	2772600
O88665	sp|O88665|BRD7_MOUSE Bromodomain-containing protein 7 OS=Mus musculus GN=Brd7 PE=1 SV=1	1	1	1	1	1.8	73.999		771720	0	378430	393290	0	0	0	0	0	0
Q8C5N9;O88736	tr|Q8C5N9|Q8C5N9_MOUSE 3-keto-steroid reductase OS=Mus musculus GN=Hsd17b7 PE=1 SV=1;sp|O88736|DHB7_MOUSE 3-keto-steroid reductase OS=Mus musculus GN=Hsd17b7 PE=1 SV=1	2	1	1	1	3.3	40.014		1249900	0	0	0	0	505310	0	744580	0	0
Q561M4;Q3UDC3;O88746;A0A1D5RM84;A0A1D5RM51;A0A1D5RM12;A0A1D5RL90;A0A1D5RM45	tr|Q561M4|Q561M4_MOUSE Target of myb1 homolog (Chicken) OS=Mus musculus GN=Tom1 PE=2 SV=1;tr|Q3UDC3|Q3UDC3_MOUSE Target of Myb protein 1 OS=Mus musculus GN=Tom1 PE=1 SV=1;sp|O88746|TOM1_MOUSE Target of Myb protein 1 OS=Mus musculus GN=Tom1 PE=1 SV=1;tr|A0A	8	6	6	6	17.9	54.325		36280000	5574800	3361000	2188600	2665400	4089700	2101700	3424000	6399700	6474600
Q3TNB8;O88842;A0A0R4J1D9	tr|Q3TNB8|Q3TNB8_MOUSE FYVE, RhoGEF and PH domain containing 3, isoform CRA_b OS=Mus musculus GN=Fgd3 PE=1 SV=1;sp|O88842|FGD3_MOUSE FYVE, RhoGEF and PH domain-containing protein 3 OS=Mus musculus GN=Fgd3 PE=1 SV=1;tr|A0A0R4J1D9|A0A0R4J1D9_MOUSE FYVE, RhoG	3	5	5	5	9.4	80.665		5639100	999290	319670	343230	367040	622870	736210	750000	505270	995550
Q5HZJ8;Q8C338;O88844;Q3TJ51;Q0QER9;A0A087WPT4;A0A087WRS9;D3YVY3;A0A087WRM4	tr|Q5HZJ8|Q5HZJ8_MOUSE Isocitrate dehydrogenase [NADP] OS=Mus musculus GN=Idh1 PE=2 SV=1;tr|Q8C338|Q8C338_MOUSE Isocitrate dehydrogenase [NADP] OS=Mus musculus GN=Idh1 PE=2 SV=1;sp|O88844|IDHC_MOUSE Isocitrate dehydrogenase [NADP] cytoplasmic OS=Mus muscul	9	17	17	16	40.8	46.674		293590000	21337000	16326000	28161000	30726000	30197000	42733000	42618000	38256000	43238000
Q5DU30;O88879;G3XA09;Q80VR5	tr|Q5DU30|Q5DU30_MOUSE Apoptotic protease-activating factor 1 (Fragment) OS=Mus musculus GN=Apaf1 PE=2 SV=1;sp|O88879|APAF_MOUSE Apoptotic protease-activating factor 1 OS=Mus musculus GN=Apaf1 PE=1 SV=3;tr|G3XA09|G3XA09_MOUSE Apoptotic protease-activating	4	8	8	8	7.8	141.22		15838000	1164100	1286000	1132800	1693900	1842800	2300100	2214700	2179500	2023500
Q6A0D9;O88958;D3Z0R5;Q8BK00;Q3TKA0	tr|Q6A0D9|Q6A0D9_MOUSE Glucosamine-6-phosphate isomerase (Fragment) OS=Mus musculus GN=Gnpda1 PE=2 SV=1;sp|O88958|GNPI1_MOUSE Glucosamine-6-phosphate isomerase 1 OS=Mus musculus GN=Gnpda1 PE=1 SV=3;tr|D3Z0R5|D3Z0R5_MOUSE Glucosamine-6-phosphate isomerase 1	5	2	2	2	10.9	30.719		13700000	1279100	0	0	847900	619490	3201800	2826100	1065400	3860400
O88968	sp|O88968|TCO2_MOUSE Transcobalamin-2 OS=Mus musculus GN=Tcn2 PE=1 SV=1	1	7	7	7	19.8	47.585		30372000	5815200	3085000	368850	1017600	152630	3450500	4151600	4470100	7860400
Q8BNF3;Q3U2Z6;Q3TDY6;O89023	tr|Q8BNF3|Q8BNF3_MOUSE Tripeptidyl peptidase I, isoform CRA_a OS=Mus musculus GN=Tpp1 PE=2 SV=1;tr|Q3U2Z6|Q3U2Z6_MOUSE Uncharacterized protein OS=Mus musculus GN=Tpp1 PE=2 SV=1;tr|Q3TDY6|Q3TDY6_MOUSE Uncharacterized protein OS=Mus musculus GN=Tpp1 PE=2 SV=	4	2	2	2	10.9	34.522		31866000	1482000	0	0	1696000	1739100	2749300	7663600	7115100	9421200
Q3U232;Q3U1N0;O89053;Q3U9K3;Q3T9L1;G3UYK8;D3YW57;G3UX53;D3YXM2	tr|Q3U232|Q3U232_MOUSE Coronin OS=Mus musculus GN=Coro1a PE=2 SV=1;tr|Q3U1N0|Q3U1N0_MOUSE Coronin OS=Mus musculus GN=Coro1a PE=1 SV=1;sp|O89053|COR1A_MOUSE Coronin-1A OS=Mus musculus GN=Coro1a PE=1 SV=5;tr|Q3U9K3|Q3U9K3_MOUSE Coronin OS=Mus musculus GN=Cor	9	21	21	10	42.5	50.959		5840100000	669840000	502970000	614820000	527600000	583440000	840560000	627450000	744400000	729040000
O89054	tr|O89054|O89054_MOUSE Cytoskeletal beta-actin (Fragment) OS=Mus musculus GN=Actb PE=2 SV=1	1	6	2	2	65.4	15.209		22396000	0	0	1496900	4064900	0	0	10104000	0	6730200
Q545K5;O89086;Q8BG13;Q5RJV3	tr|Q545K5|Q545K5_MOUSE MCG116386, isoform CRA_a OS=Mus musculus GN=Rbm3 PE=1 SV=1;sp|O89086|RBM3_MOUSE RNA-binding protein 3 OS=Mus musculus GN=Rbm3 PE=1 SV=1;tr|Q8BG13|Q8BG13_MOUSE RNA-binding protein 3 OS=Mus musculus GN=Rbm3 PE=1 SV=1	4	3	3	3	20.3	16.604		37956000	1767800	5346800	7571000	4177300	8619300	7845000	0	2629300	0
Q544T5;P00375	tr|Q544T5|Q544T5_MOUSE Dihydrofolate reductase OS=Mus musculus GN=Dhfr PE=1 SV=1;sp|P00375|DYR_MOUSE Dihydrofolate reductase OS=Mus musculus GN=Dhfr PE=1 SV=3	2	5	5	5	32.1	21.606		41839000	5036500	1970600	0	6994500	5882000	7367900	395440	6110700	8081800
Q99KF5;P00493;Q6TDG6;A0A0H3YJA6	tr|Q99KF5|Q99KF5_MOUSE Hypoxanthine phosphoribosyltransferase OS=Mus musculus GN=Hprt PE=2 SV=1;sp|P00493|HPRT_MOUSE Hypoxanthine-guanine phosphoribosyltransferase OS=Mus musculus GN=Hprt1 PE=1 SV=3	4	8	8	8	42.2	24.544		336610000	21813000	24495000	21824000	41631000	42922000	62315000	39614000	36443000	45557000
P01027;CON__Q2UVX4;H3BL60;Q207D2;H3BKW9;B5APU1;E1APH6	sp|P01027|CO3_MOUSE Complement C3 OS=Mus musculus GN=C3 PE=1 SV=3	7	50	50	50	33.9	186.48		306410000	52870000	37810000	38320000	545930	771950	1193600	56260000	49050000	69592000
Q3U463;P01101	tr|Q3U463|Q3U463_MOUSE Uncharacterized protein OS=Mus musculus GN=Fos PE=2 SV=1;sp|P01101|FOS_MOUSE Proto-oncogene c-Fos OS=Mus musculus GN=Fos PE=1 SV=1	2	1	1	1	3.2	40.778		3094200	0	0	0	1073800	615670	1184200	220510	0	0
Q91Z73;Q91Z72;Q9D239;Q3U679;P01887	tr|Q91Z73|Q91Z73_MOUSE Beta-2-microglobulin (Fragment) OS=Mus musculus musculus PE=3 SV=1;tr|Q91Z72|Q91Z72_MUSMM Beta-2-microglobulin (Fragment) OS=Mus musculus molossinus PE=3 SV=1;tr|Q9D239|Q9D239_MOUSE Beta-2-microglobulin OS=Mus musculus GN=B2m PE=2 SV	5	2	2	2	25	8.868		156980000	30577000	19436000	35046000	3117200	4676200	7278200	18788000	12759000	25299000
P01900;Q6RJ38;K7W4D1;P01895;Q31154;Q64272;Q61642;D2YW38;Q3UBW0;W5XIT1;Q3TH01;Q5KTQ0;Q7JJ15;Q3TVI9;Q31142;P01901;Q31210;Q9QWF4;F2WVG9;F2WVG7;G3UXW2;F2WVG6;Q8WM98;Q31216;W5XHY0;W5XIK7;Q9TQL9;Q9XR36;Q9XR35;Q9TQM0;Q4KN81;Q2XN57	sp|P01900|HA12_MOUSE H-2 class I histocompatibility antigen, D-D alpha chain OS=Mus musculus GN=H2-D1 PE=1 SV=1;tr|Q6RJ38|Q6RJ38_MOUSE MHC class I heavy chain maturation peptide H-2D(D) (Fragment) OS=Mus musculus GN=H2-D1 PE=2 SV=1;tr|K7W4D1|K7W4D1_MOUSE M	32	10	10	0	30.7	41.11		116630000	11739000	7001000	11543000	6477100	6454500	11437000	11338000	22753000	27884000
Q4FK28;Q4FJZ7;P03958	tr|Q4FK28|Q4FK28_MOUSE Ada protein OS=Mus musculus GN=Ada PE=1 SV=1;tr|Q4FJZ7|Q4FJZ7_MOUSE Ada protein OS=Mus musculus GN=Ada PE=2 SV=1;sp|P03958|ADA_MOUSE Adenosine deaminase OS=Mus musculus GN=Ada PE=1 SV=3	3	4	4	4	15.1	39.991		41469000	5525400	4493800	4222900	5356300	2195700	7606100	3141800	4934600	3992700
Q7TQ39;P03975;Q3UGR7;Q61213;Q1W5W7	tr|Q7TQ39|Q7TQ39_MOUSE Gag protein OS=Mus musculus GN=gag PE=4 SV=1;sp|P03975|IGEB_MOUSE IgE-binding protein OS=Mus musculus GN=Iap PE=2 SV=1;tr|Q3UGR7|Q3UGR7_MOUSE Uncharacterized protein (Fragment) OS=Mus musculus PE=2 SV=1;tr|Q61213|Q61213_MOUSE Gag OS=	5	2	2	2	4.1	65.444		6889500	234550	588680	264040	1041600	0	1448600	1107400	905900	1298700
P04627;A0A0N4SWH5;B1AUP0;Q3UXR0;Q3TQI2;E9Q0P8	sp|P04627|ARAF_MOUSE Serine/threonine-protein kinase A-Raf OS=Mus musculus GN=Araf PE=1 SV=2;tr|A0A0N4SWH5|A0A0N4SWH5_MOUSE RAF proto-oncogene serine/threonine-protein kinase (Fragment) OS=Mus musculus GN=Raf1 PE=4 SV=1;tr|B1AUP0|B1AUP0_MOUSE Serine/threon	6	2	2	1	3.8	67.581		2075000	531270	0	0	0	435640	0	889260	218840	0
Q5FWB7;P05064;A6ZI44;Q6NY00;D3YWI1;Q9CPQ9;A6ZI46;A0A0U1RPN8;D3Z510;D3YV98;A0A0U1RPT5;A6ZI47;P05063;Q3UER1;Q3TJ66;Q91Y97	tr|Q5FWB7|Q5FWB7_MOUSE Fructose-bisphosphate aldolase OS=Mus musculus GN=Aldoa PE=1 SV=1;sp|P05064|ALDOA_MOUSE Fructose-bisphosphate aldolase A OS=Mus musculus GN=Aldoa PE=1 SV=2;tr|A6ZI44|A6ZI44_MOUSE Fructose-bisphosphate aldolase OS=Mus musculus GN=Aldo	16	23	23	23	70.6	39.355		3551100000	355400000	343230000	311130000	389710000	369990000	484620000	409190000	413310000	474520000
P05132;J9JDU9	sp|P05132|KAPCA_MOUSE cAMP-dependent protein kinase catalytic subunit alpha OS=Mus musculus GN=Prkaca PE=1 SV=3;tr|J9JDU9|J9JDU9_MOUSE cAMP-dependent protein kinase catalytic subunit alpha isoform (Fragment) OS=Mus musculus GN=Prkaca PE=2 SV=1	2	6	6	2	18.2	40.57		56052000	5706100	2641300	2908400	7101000	5711200	10400000	6472500	6529900	8581300
P05201;F7ALS6	sp|P05201|AATC_MOUSE Aspartate aminotransferase, cytoplasmic OS=Mus musculus GN=Got1 PE=1 SV=3	2	11	11	11	34.4	46.247		174480000	16703000	11113000	15539000	20057000	18678000	30788000	23405000	15107000	23088000
P05202	sp|P05202|AATM_MOUSE Aspartate aminotransferase, mitochondrial OS=Mus musculus GN=Got2 PE=1 SV=1	1	16	16	16	38.8	47.411		1004500000	15752000	20922000	26138000	373520000	26298000	36449000	445530000	31828000	28057000
P05213;Q99KA2	sp|P05213|TBA1B_MOUSE Tubulin alpha-1B chain OS=Mus musculus GN=Tuba1b PE=1 SV=2;tr|Q99KA2|Q99KA2_MOUSE Tubulin alpha chain (Fragment) OS=Mus musculus GN=Tuba1b PE=2 SV=1	2	19	19	0	53.7	50.151		3141600000	239650000	188050000	240050000	354680000	353030000	491380000	376240000	417140000	481390000
P06745;B7ZWL9;CON__Q3ZBD7;A0A0U1RQ18;A0A0U1RP97;A0A0U1RQ72	sp|P06745|G6PI_MOUSE Glucose-6-phosphate isomerase OS=Mus musculus GN=Gpi PE=1 SV=4;tr|B7ZWL9|B7ZWL9_MOUSE Glucose-6-phosphate isomerase OS=Mus musculus GN=Gpi1 PE=2 SV=1	6	20	20	8	40	62.766		1905800000	129170000	91617000	58075000	276410000	231540000	350430000	230240000	254520000	283800000
S4R1M0;S4R2V1;S4R1S4;P06800;Q3U382;Q64730;Q8C6Q7;A1E2H6;Q5XFY7;Q05C79;A0A0A6YXM4	tr|S4R1M0|S4R1M0_MOUSE Receptor-type tyrosine-protein phosphatase C OS=Mus musculus GN=Ptprc PE=1 SV=1;tr|S4R2V1|S4R2V1_MOUSE Protein tyrosine phosphatase, receptor type, C, isoform CRA_b OS=Mus musculus GN=Ptprc PE=1 SV=1;tr|S4R1S4|S4R1S4_MOUSE Receptor-t	11	23	23	23	23.9	128.57		176750000	19126000	17247000	13525000	16526000	18458000	20052000	21296000	24331000	26187000
Q5M9K1;P07309;Q9D6A4	tr|Q5M9K1|Q5M9K1_MOUSE Transthyretin OS=Mus musculus GN=Ttr PE=1 SV=1;sp|P07309|TTHY_MOUSE Transthyretin OS=Mus musculus GN=Ttr PE=1 SV=1;tr|Q9D6A4|Q9D6A4_MOUSE Transthyretin OS=Mus musculus GN=Ttr PE=2 SV=1	3	2	2	2	19	15.776		109120000	20658000	15958000	15498000	5799500	6573400	9883500	8926000	13066000	12761000
Q542G9;P07356;Q3UCD3;Q9CZI7;B0V2N7;Q99KH3;B0V2N5;B0V2N8;REV__F6WNG1;REV__Q8BND4	tr|Q542G9|Q542G9_MOUSE Annexin OS=Mus musculus GN=Anxa2 PE=1 SV=1;sp|P07356|ANXA2_MOUSE Annexin A2 OS=Mus musculus GN=Anxa2 PE=1 SV=2;tr|Q3UCD3|Q3UCD3_MOUSE Annexin OS=Mus musculus GN=Anxa2 PE=2 SV=1;tr|Q9CZI7|Q9CZI7_MOUSE Annexin OS=Mus musculus GN=Anxa2	10	26	26	26	66.7	38.676		1517100000	156090000	166430000	131310000	167610000	161290000	216470000	163160000	161190000	193540000
Q60590;P07361	sp|Q60590|A1AG1_MOUSE Alpha-1-acid glycoprotein 1 OS=Mus musculus GN=Orm1 PE=1 SV=1;sp|P07361|A1AG2_MOUSE Alpha-1-acid glycoprotein 2 OS=Mus musculus GN=Orm2 PE=1 SV=1	2	1	1	1	4.3	23.895		15517000	3250500	0	0	0	0	0	4277000	3875700	4113600
Q9D0H1;Q544L2;P07607;A0A0G2JGG2;A0A0G2JF31;D6RCW9;A0A0G2JF03;Q8C2R3;Q8C2H6;Q8VDV6	tr|Q9D0H1|Q9D0H1_MOUSE Uncharacterized protein OS=Mus musculus GN=Tyms PE=2 SV=1;tr|Q544L2|Q544L2_MOUSE Thymidylate synthase, isoform CRA_b OS=Mus musculus GN=Tyms PE=1 SV=1;sp|P07607|TYSY_MOUSE Thymidylate synthase OS=Mus musculus GN=Tyms PE=1 SV=1;tr|A0A	10	2	2	2	9.4	34.989		2568400	0	459740	614670	0	0	170150	0	0	1323800
Q546G4;P07724;K7R066	tr|Q546G4|Q546G4_MOUSE Albumin 1 OS=Mus musculus GN=Alb PE=1 SV=1;sp|P07724|ALBU_MOUSE Serum albumin OS=Mus musculus GN=Alb PE=1 SV=3	3	19	19	18	38.7	68.692		101660000	22365000	16556000	23684000	262630	0	639490	10084000	9630700	18441000
P07742;Q05DU8;Q6NZB3	sp|P07742|RIR1_MOUSE Ribonucleoside-diphosphate reductase large subunit OS=Mus musculus GN=Rrm1 PE=1 SV=2;tr|Q05DU8|Q05DU8_MOUSE Ribonucleoside-diphosphate reductase (Fragment) OS=Mus musculus GN=Rrm1 PE=2 SV=1;tr|Q6NZB3|Q6NZB3_MOUSE Ribonucleoside-diphosp	3	14	14	14	23.1	90.209		31050000	3894100	4452300	5469400	2259000	3116700	3457700	1015800	2610000	4774800
P07759;A0A0R4J0I1;E9Q499;Q4V9W0;F2Z405;Q3UE77;Q3UDB3;Q3U1B7;A2RTV1;Q14AS7;G3X8T9;Q3U0Y1;P29621;Q91WP6;Q03734;Q5I2A0;Q80X76	sp|P07759|SPA3K_MOUSE Serine protease inhibitor A3K OS=Mus musculus GN=Serpina3k PE=1 SV=2;tr|A0A0R4J0I1|A0A0R4J0I1_MOUSE MCG1051009 OS=Mus musculus GN=Serpina3k PE=1 SV=1	17	4	4	4	12	46.879		8638000	1258200	2979000	1783600	0	0	0	1944600	0	672600
Q80Y52;Q3UIF3;P07901;Q3TKA2;Q3TKB9;Q3TKG0;A0PJ91;Q8C5U3;Q3TJU7;Q8C2A9;B7ZC50;A2A6A2;B7ZC49	tr|Q80Y52|Q80Y52_MOUSE Heat shock protein 90, alpha (Cytosolic), class A member 1 OS=Mus musculus GN=Hsp90aa1 PE=1 SV=2;tr|Q3UIF3|Q3UIF3_MOUSE Uncharacterized protein OS=Mus musculus GN=Hsp90aa1 PE=2 SV=1;sp|P07901|HS90A_MOUSE Heat shock protein HSP 90-alp	13	30	19	19	42.3	84.787		472850000	33034000	39329000	27287000	51108000	70158000	80375000	43161000	71270000	57125000
P08030;A0A1D5RLR6	sp|P08030|APT_MOUSE Adenine phosphoribosyltransferase OS=Mus musculus GN=Aprt PE=1 SV=2;tr|A0A1D5RLR6|A0A1D5RLR6_MOUSE Adenine phosphoribosyltransferase OS=Mus musculus GN=Aprt PE=1 SV=1	2	6	6	6	32.8	19.724		169070000	21453000	4858000	5874700	16512000	25801000	22824000	31203000	19739000	20805000
Q91V38;Q3UAD6;P08113;Q3UBU0;Q3TUD6;Q8CCY5;F7C312;Q8C2R2;Q9CW12	tr|Q91V38|Q91V38_MOUSE Heat shock protein 90, beta (Grp94), member 1 OS=Mus musculus GN=Hsp90b1 PE=2 SV=1;tr|Q3UAD6|Q3UAD6_MOUSE Heat shock protein 90kDa beta (Grp94), member 1 OS=Mus musculus GN=Hsp90b1 PE=1 SV=1;sp|P08113|ENPL_MOUSE Endoplasmin OS=Mus mu	9	25	24	24	34.2	92.489		612500000	46605000	41446000	38760000	76563000	82902000	102210000	63745000	80542000	79729000
Q3UF30;Q3TC45;P08207	tr|Q3UF30|Q3UF30_MOUSE Uncharacterized protein OS=Mus musculus GN=S100a10 PE=2 SV=1;tr|Q3TC45|Q3TC45_MOUSE S100 calcium binding protein A10 (Calpactin), isoform CRA_a OS=Mus musculus GN=S100a10 PE=1 SV=1;sp|P08207|S10AA_MOUSE Protein S100-A10 OS=Mus muscul	3	1	1	1	17.5	11.213		9663200	0	0	0	1993100	986550	4500400	2183100	0	0
P08228;Q8C355	sp|P08228|SODC_MOUSE Superoxide dismutase [Cu-Zn] OS=Mus musculus GN=Sod1 PE=1 SV=2	2	5	5	5	39	15.942		792300000	100810000	80297000	52203000	84282000	86271000	131230000	81313000	105520000	70387000
P08249;A0A0G2JF23;A0A0G2JGY4	sp|P08249|MDHM_MOUSE Malate dehydrogenase, mitochondrial OS=Mus musculus GN=Mdh2 PE=1 SV=3	3	18	18	18	65.7	35.611		1272100000	121990000	131880000	134910000	124920000	117130000	187480000	150910000	148120000	154750000
P08752;A0A0A6YWA9;Q8JZT4;B2RSH2;Q922Y6;A2AE32;Q9D7B3;Q543S2;B2RVZ3;A2AE33;P20612;P18872;Q3V3I2;P50149;Q61018;Q9JJ21;A2A610;A2AE31;Q8C040;Q8BSY7;Q9WUC0;D3Z2M7;Q8BHK8;F6QPU5;Q3TY78;Q66L47;Q8CGK7	sp|P08752|GNAI2_MOUSE Guanine nucleotide-binding protein G(i) subunit alpha-2 OS=Mus musculus GN=Gnai2 PE=1 SV=5;tr|A0A0A6YWA9|A0A0A6YWA9_MOUSE Guanine nucleotide-binding protein G(i) subunit alpha-2 (Fragment) OS=Mus musculus GN=Gnai2 PE=1 SV=1	27	15	15	11	56.6	40.489		1440800000	123420000	113670000	125700000	145270000	163760000	209050000	167780000	196350000	195790000
P09055;Q8BUD1	sp|P09055|ITB1_MOUSE Integrin beta-1 OS=Mus musculus GN=Itgb1 PE=1 SV=1	2	3	3	3	3.9	88.231		6213800	332690	385750	888260	167380	589000	1378200	0	1016600	1455900
Q3UDR2;Q3URP6;Q3UBY9;Q3TWE3;Q3TIM0;Q3THC3;Q3TF72;P09103;Q3U738;Q3UJA8;Q3UA23;Q3TGS0;Q3TT76;Q3TIQ5;E9Q8G8	tr|Q3UDR2|Q3UDR2_MOUSE Protein disulfide-isomerase (Fragment) OS=Mus musculus GN=P4hb PE=2 SV=1;tr|Q3URP6|Q3URP6_MOUSE Protein disulfide-isomerase OS=Mus musculus GN=P4hb PE=2 SV=1;tr|Q3UBY9|Q3UBY9_MOUSE Protein disulfide-isomerase OS=Mus musculus GN=P4hb	15	22	22	22	46.5	56.6		538540000	48127000	53523000	31146000	62183000	49198000	96277000	57516000	63091000	77482000
Q8CD23;Q3TL52;Q3TGR3;P09405;Q8CE30;Q3TT41;Q9CT46;A0A087WRM5	tr|Q8CD23|Q8CD23_MOUSE Uncharacterized protein OS=Mus musculus GN=Ncl PE=2 SV=1;tr|Q3TL52|Q3TL52_MOUSE Uncharacterized protein OS=Mus musculus GN=Ncl PE=2 SV=1;tr|Q3TGR3|Q3TGR3_MOUSE Uncharacterized protein OS=Mus musculus GN=Ncl PE=2 SV=1;sp|P09405|NUCL_M	8	27	27	27	32.5	76.864		572760000	57793000	58561000	43887000	62243000	49603000	80960000	63974000	72397000	83339000
P09411;S4R2M7;B0LAA9;P09041	sp|P09411|PGK1_MOUSE Phosphoglycerate kinase 1 OS=Mus musculus GN=Pgk1 PE=1 SV=4;tr|S4R2M7|S4R2M7_MOUSE Phosphoglycerate kinase OS=Mus musculus GN=Pgk1 PE=1 SV=1	4	26	26	26	71.7	44.55		1878400000	188510000	168310000	181230000	190770000	190490000	274520000	218770000	227350000	238400000
P09528	sp|P09528|FRIH_MOUSE Ferritin heavy chain OS=Mus musculus GN=Fth1 PE=1 SV=2	1	9	9	9	56	21.066		293920000	11980000	6134200	4649500	36104000	100430000	34107000	24724000	52716000	23069000
Q4FJX9;Q3U8W4;P09671	tr|Q4FJX9|Q4FJX9_MOUSE Superoxide dismutase OS=Mus musculus GN=Sod2 PE=1 SV=1;tr|Q3U8W4|Q3U8W4_MOUSE Superoxide dismutase OS=Mus musculus GN=Sod2 PE=2 SV=1;sp|P09671|SODM_MOUSE Superoxide dismutase [Mn], mitochondrial OS=Mus musculus GN=Sod2 PE=1 SV=3	3	1	1	1	6.3	24.603		16876000	1473600	2274200	2494700	1223900	1640300	1422400	1782400	1786100	2778600
P0C6B7	sp|P0C6B7|IGSF6_MOUSE Immunoglobulin superfamily member 6 OS=Mus musculus GN=Igsf6 PE=2 SV=1	1	1	1	1	5.9	26.354		10612000	2000600	0	0	691010	779260	0	2552000	2072000	2517500
P0CG14	sp|P0CG14|CTF8A_MOUSE Chromosome transmission fidelity protein 8 homolog isoform 2 OS=Mus musculus GN=Chtf8 PE=1 SV=1	1	4	4	4	10.1	52.244		2997400	524070	0	0	169280	533850	390740	374400	273870	731220
P0DP28;P0DP27;P0DP26;Q3UKW2;Q9D6P8;G3UX57;Q3UZY7;P20801	sp|P0DP28|CALM3_MOUSE Calmodulin-3 OS=Mus musculus GN=Calm3 PE=1 SV=1;sp|P0DP27|CALM2_MOUSE Calmodulin-2 OS=Mus musculus GN=Calm2 PE=1 SV=1;sp|P0DP26|CALM1_MOUSE Calmodulin-1 OS=Mus musculus GN=Calm1 PE=1 SV=1;tr|Q3UKW2|Q3UKW2_MOUSE Calmodulin-1 OS=Mus mus	8	7	7	7	50.3	16.837		2330600000	333230000	241270000	159400000	211830000	192970000	336210000	244100000	265130000	346470000
Q58E64;Q3UA81;P10126;Q3UZQ3;Q3TII3;D3YZ68;D3Z3I8;P62631;Q4FZE5	tr|Q58E64|Q58E64_MOUSE Elongation factor 1-alpha OS=Mus musculus GN=Eef1a1 PE=1 SV=1;tr|Q3UA81|Q3UA81_MOUSE Elongation factor 1-alpha OS=Mus musculus GN=Eef1a1 PE=2 SV=1;sp|P10126|EF1A1_MOUSE Elongation factor 1-alpha 1 OS=Mus musculus GN=Eef1a1 PE=1 SV=3;	9	22	22	22	49.8	50.113		5833900000	590300000	539030000	678760000	546210000	655930000	671190000	703810000	710910000	737770000
Q9DD05;P10518;Q8VCZ1;O89061	tr|Q9DD05|Q9DD05_MOUSE Delta-aminolevulinic acid dehydratase OS=Mus musculus GN=Alad PE=2 SV=1;sp|P10518|HEM2_MOUSE Delta-aminolevulinic acid dehydratase OS=Mus musculus GN=Alad PE=1 SV=1;tr|Q8VCZ1|Q8VCZ1_MOUSE Alad protein OS=Mus musculus GN=Alad PE=2 SV=	4	2	2	2	8.2	36.039		7370200	1295700	2080000	1318000	365890	0	0	0	1537900	772700
Q3TVS6;Q3TC17;P10605;Q6LAF6	tr|Q3TVS6|Q3TVS6_MOUSE Uncharacterized protein OS=Mus musculus GN=Ctsb PE=2 SV=1;tr|Q3TC17|Q3TC17_MOUSE Uncharacterized protein OS=Mus musculus GN=Ctsb PE=2 SV=1;sp|P10605|CATB_MOUSE Cathepsin B OS=Mus musculus GN=Ctsb PE=1 SV=2;tr|Q6LAF6|Q6LAF6_MOUSE Cath	4	5	5	5	18.3	37.319		95489000	9232100	8036200	10806000	8419000	8451300	12210000	8177100	15832000	14326000
Q8BTU6;Q52KC1;P10630;E9Q561	tr|Q8BTU6|Q8BTU6_MOUSE Eukaryotic initiation factor 4A-II OS=Mus musculus GN=Eif4a2 PE=1 SV=1;tr|Q52KC1|Q52KC1_MOUSE Eukaryotic translation initiation factor 4A2 OS=Mus musculus GN=Eif4a2 PE=2 SV=1;sp|P10630|IF4A2_MOUSE Eukaryotic initiation factor 4A-II O	4	12	2	2	28.2	41.29		9765400	1238700	1206600	1482800	362210	1307300	917210	1338400	523750	1388400
P10639	sp|P10639|THIO_MOUSE Thioredoxin OS=Mus musculus GN=Txn PE=1 SV=3	1	6	6	6	48.6	11.675		3548600000	437700000	431720000	340560000	364180000	310600000	559390000	342830000	392880000	368710000
Q3UWX7;Q3UPE0;P10711;E9PYD5;Q3UV78;B7ZCS4;F6XMY4;Q810R3;Q9QVN7	tr|Q3UWX7|Q3UWX7_MOUSE Uncharacterized protein OS=Mus musculus GN=Tcea1 PE=2 SV=1;tr|Q3UPE0|Q3UPE0_MOUSE Uncharacterized protein OS=Mus musculus GN=Tcea1 PE=2 SV=1;sp|P10711|TCEA1_MOUSE Transcription elongation factor A protein 1 OS=Mus musculus GN=Tcea1 P	9	8	8	8	32.9	33.88		100890000	13428000	9541900	10545000	11977000	10183000	13332000	9733200	13125000	9021300
Q3TI17;P10749	tr|Q3TI17|Q3TI17_MOUSE Uncharacterized protein (Fragment) OS=Mus musculus GN=Il1b PE=2 SV=1;sp|P10749|IL1B_MOUSE Interleukin-1 beta OS=Mus musculus GN=Il1b PE=1 SV=1	2	1	1	1	5.3	23.86		21113000	516440	637380	690510	3020100	4742400	4128200	2833500	4544900	0
Q3TN39;Q60849;P10852;Q3TIP1;A0A0U1RP98;A0A0U1RPK4;Q3U144;Q8BTJ9	tr|Q3TN39|Q3TN39_MOUSE Uncharacterized protein OS=Mus musculus GN=Slc3a2 PE=2 SV=1;tr|Q60849|Q60849_MOUSE CD98 heavy chain OS=Mus musculus GN=Slc3a2 PE=2 SV=1;sp|P10852|4F2_MOUSE 4F2 cell-surface antigen heavy chain OS=Mus musculus GN=Slc3a2 PE=1 SV=1;tr|Q	8	2	2	2	5.1	58.327		20598000	1565400	1995400	2281700	1933900	2997900	2999100	2897200	1872600	2055200
Q8C1Y3;Q3U4Y0;P10922	tr|Q8C1Y3|Q8C1Y3_MOUSE Uncharacterized protein OS=Mus musculus GN=H1f0 PE=2 SV=1;tr|Q3U4Y0|Q3U4Y0_MOUSE Uncharacterized protein OS=Mus musculus GN=H1f0 PE=2 SV=1;sp|P10922|H10_MOUSE Histone H1.0 OS=Mus musculus GN=H1f0 PE=2 SV=4	3	3	3	3	15.1	19.253		107490000	14941000	13472000	13834000	9029200	6598400	13650000	10800000	10767000	14399000
P11031	sp|P11031|TCP4_MOUSE Activated RNA polymerase II transcriptional coactivator p15 OS=Mus musculus GN=Sub1 PE=1 SV=3	1	5	5	5	37.8	14.427		496620000	58513000	78156000	44493000	48490000	33491000	63212000	32050000	59378000	78837000
P11247;Q7TMS4;F8WGZ9;A0A0A0MQL9	sp|P11247|PERM_MOUSE Myeloperoxidase OS=Mus musculus GN=Mpo PE=1 SV=2;tr|Q7TMS4|Q7TMS4_MOUSE Mpo protein OS=Mus musculus GN=Mpo PE=2 SV=1	4	33	1	1	50.1	81.181		3388500	0	0	0	0	0	3388500	0	0	0
P11352;A0A0A6YY34;A0A0A6YVV2	sp|P11352|GPX1_MOUSE Glutathione peroxidase 1 OS=Mus musculus GN=Gpx1 PE=1 SV=2;tr|A0A0A6YY34|A0A0A6YY34_MOUSE Glutathione peroxidase OS=Mus musculus GN=Gpx1 PE=1 SV=1;tr|A0A0A6YVV2|A0A0A6YVV2_MOUSE Glutathione peroxidase OS=Mus musculus GN=Gpx1 PE=1 SV=1	3	11	11	11	65.2	22.329		1088500000	112180000	99700000	132510000	99373000	99220000	146230000	120650000	124290000	154340000
Q8VH34;Q3TX84;Q3TA96;Q9DC13;P11438;Q922T9	tr|Q8VH34|Q8VH34_MOUSE LAMP-1 OS=Mus musculus GN=Lamp1 PE=2 SV=1;tr|Q3TX84|Q3TX84_MOUSE Uncharacterized protein OS=Mus musculus GN=Lamp1 PE=2 SV=1;tr|Q3TA96|Q3TA96_MOUSE Lysosomal membrane glycoprotein 1, isoform CRA_c OS=Mus musculus GN=Lamp1 PE=1 SV=1;tr	6	3	3	3	8.4	43.879		106910000	8109600	8602000	18808000	7373700	8816100	10564000	16097000	12182000	16360000
Q99JW7;P11440;D3Z2T9;Q8R4A4;Q6LEQ3;E9Q9E4;E9PZX7;Q8BP21;Q545C3;Q0VDL5;Q8C411;Q8BN81;Q6NVF8;I6L9D3;E3W997;Q0VDL6;E9PVC7;Q3TM24;A0A1L1SUS7;Q91WP4;Q543G3;Q3UPI3;A0A1Y7VLM0;P30285;Q3V3A1;Q04899;O35495;Q04735;Q8K0D0;Q14AX6;Q69ZA1	tr|Q99JW7|Q99JW7_MOUSE Cdc2a protein (Fragment) OS=Mus musculus GN=Cdk1 PE=2 SV=1;sp|P11440|CDK1_MOUSE Cyclin-dependent kinase 1 OS=Mus musculus GN=Cdk1 PE=1 SV=3;tr|D3Z2T9|D3Z2T9_MOUSE Cyclin-dependent kinase 1 (Fragment) OS=Mus musculus GN=Cdk1 PE=1 SV=1	31	5	3	3	17.3	33.832		11218000	1582400	787770	0	1590200	1413700	2095700	1217400	1048100	1483100
Q71LX8;P11499;Q80YC2;Q811H6;E9Q3D6;E9PX27;D3Z1R1;E9Q0C3;Q922F6;REV__Q8BL66	tr|Q71LX8|Q71LX8_MOUSE Heat shock protein 84b OS=Mus musculus GN=Hsp90ab1 PE=1 SV=1;sp|P11499|HS90B_MOUSE Heat shock protein HSP 90-beta OS=Mus musculus GN=Hsp90ab1 PE=1 SV=3	10	33	33	21	46.4	83.28		2001900000	195420000	278410000	232240000	189340000	185320000	227500000	209210000	238460000	246050000
P11672;A0A0A6YW77;Q60842	sp|P11672|NGAL_MOUSE Neutrophil gelatinase-associated lipocalin OS=Mus musculus GN=Lcn2 PE=1 SV=1;tr|A0A0A6YW77|A0A0A6YW77_MOUSE Neutrophil gelatinase-associated lipocalin (Fragment) OS=Mus musculus GN=Lcn2 PE=1 SV=1;tr|Q60842|Q60842_MOUSE Chromosome 24p3	3	7	7	7	30.5	22.875		5187200000	816040000	932360000	613750000	58615000	11633000	80351000	806780000	830730000	1037000000
Q542I8;P11835;M0QWA7;D3YYP8;D3Z1S4;M0QWJ6	tr|Q542I8|Q542I8_MOUSE Integrin beta OS=Mus musculus GN=Itgb2 PE=1 SV=1;sp|P11835|ITB2_MOUSE Integrin beta-2 OS=Mus musculus GN=Itgb2 PE=1 SV=2;tr|M0QWA7|M0QWA7_MOUSE Integrin beta OS=Mus musculus GN=Itgb2 PE=1 SV=1	6	33	33	33	51.9	84.893		1181600000	130000000	111860000	124460000	84256000	87060000	127410000	161480000	168890000	186240000
P11983;W0TYI4;Q9QZ34;Q6LBL9;Q62289;Q9QZ36;Q9QZ35;Q62290;Q9QZ33;F2Z483;Q62291	sp|P11983|TCPA_MOUSE T-complex protein 1 subunit alpha OS=Mus musculus GN=Tcp1 PE=1 SV=3	11	17	17	17	36	60.448		344110000	31412000	16956000	22398000	44695000	53251000	41310000	25579000	56537000	51976000
Q3TW82;P12265;D3YY48;Q8VEM0;Q8BPE3;Q99KJ6	tr|Q3TW82|Q3TW82_MOUSE Beta-glucuronidase OS=Mus musculus GN=Gusb PE=2 SV=1;sp|P12265|BGLR_MOUSE Beta-glucuronidase OS=Mus musculus GN=Gusb PE=1 SV=2	6	6	6	6	11	74.27		23612000	1782700	0	0	1705300	1741400	1629700	4349800	4028300	8374800
P12382;Q8CD98;Q9D255;Q99K08;P47857	sp|P12382|PFKAL_MOUSE ATP-dependent 6-phosphofructokinase, liver type OS=Mus musculus GN=Pfkl PE=1 SV=4;tr|Q8CD98|Q8CD98_MOUSE Uncharacterized protein OS=Mus musculus GN=Pfkl PE=2 SV=1	5	9	9	8	15.9	85.359		25777000	2396800	2518200	3572900	2363700	900160	3486500	3241600	2590600	4707200
P12787	sp|P12787|COX5A_MOUSE Cytochrome c oxidase subunit 5A, mitochondrial OS=Mus musculus GN=Cox5a PE=1 SV=2	1	4	4	4	34.2	16.101		454880000	45353000	55386000	65388000	38475000	38878000	60721000	51846000	44227000	54605000
Q8C5M4;P12815;Q3UGE5	tr|Q8C5M4|Q8C5M4_MOUSE Uncharacterized protein OS=Mus musculus GN=Pdcd6 PE=2 SV=1;sp|P12815|PDCD6_MOUSE Programmed cell death protein 6 OS=Mus musculus GN=Pdcd6 PE=1 SV=2;tr|Q3UGE5|Q3UGE5_MOUSE Programmed cell death 6, isoform CRA_a OS=Mus musculus GN=Pdcd	3	3	3	3	24.1	21.853		23825000	424430	0	0	3906300	5577100	4641900	1031900	4442200	3801400
Q6P1A9;Q5EBG5;Q58ET1;Q80UT7;P12970;A0A140T8L1;A0A140T8L3;Q8CDE3;V9GX35	tr|Q6P1A9|Q6P1A9_MOUSE Ribosomal protein L7A OS=Mus musculus GN=Rpl7a PE=2 SV=1;tr|Q5EBG5|Q5EBG5_MOUSE Ribosomal protein L7A OS=Mus musculus GN=Rpl7a PE=2 SV=1;tr|Q58ET1|Q58ET1_MOUSE MCG11348 OS=Mus musculus GN=Rpl7a PE=1 SV=1;tr|Q80UT7|Q80UT7_MOUSE Rpl7a	9	15	15	15	46.6	30.024		1492500000	167540000	168660000	187570000	144960000	151200000	184780000	159130000	155150000	173460000
Q544K9;Q3TVV7;P13439;D6RJ62	tr|Q544K9|Q544K9_MOUSE Uridine monophosphate synthetase OS=Mus musculus GN=Umps PE=1 SV=1;tr|Q3TVV7|Q3TVV7_MOUSE Uncharacterized protein OS=Mus musculus GN=Umps PE=2 SV=1;sp|P13439|UMPS_MOUSE Uridine 5-monophosphate synthase OS=Mus musculus GN=Umps PE=1 S	4	9	9	9	24.5	52.292		45097000	4419700	2790900	3281400	5980200	5587300	5181300	7148700	6371200	4336500
Q3UHZ3;Q7TSJ0;P13864;J3QNW0;Q3UPE8;Q3UWN4;Q0VDW2	tr|Q3UHZ3|Q3UHZ3_MOUSE DNA (cytosine-5)-methyltransferase OS=Mus musculus GN=Dnmt1 PE=2 SV=1;tr|Q7TSJ0|Q7TSJ0_MOUSE DNA (cytosine-5)-methyltransferase OS=Mus musculus GN=Dnmt1 PE=2 SV=1;sp|P13864|DNMT1_MOUSE DNA (cytosine-5)-methyltransferase 1 OS=Mus musc	7	22	22	22	15.9	183.31		25704000	2457900	3300300	3606300	2286500	2082700	3081200	2249900	2556700	4082800
Q545I9;P14069	tr|Q545I9|Q545I9_MOUSE Protein S100 OS=Mus musculus GN=S100a6 PE=1 SV=1;sp|P14069|S10A6_MOUSE Protein S100-A6 OS=Mus musculus GN=S100a6 PE=1 SV=3	2	4	4	4	52.8	10.051		2708000000	511720000	664730000	125310000	282240000	119360000	302950000	174430000	281240000	245960000
Q545P0;Q3TV47;Q3TSQ1;P14094;A0A0A6YX05;Q3TRA6	tr|Q545P0|Q545P0_MOUSE Sodium/potassium-transporting ATPase subunit beta OS=Mus musculus GN=Atp1b1 PE=1 SV=1;tr|Q3TV47|Q3TV47_MOUSE Sodium/potassium-transporting ATPase subunit beta OS=Mus musculus GN=Atp1b1 PE=2 SV=1;tr|Q3TSQ1|Q3TSQ1_MOUSE Sodium/potassiu	6	2	2	2	8.9	35.194		7552900	1408100	1963000	3064500	0	1117400	0	0	0	0
P14115	sp|P14115|RL27A_MOUSE 60S ribosomal protein L27a OS=Mus musculus GN=Rpl27a PE=1 SV=5	1	5	5	5	33.8	16.605		1567100000	161900000	101840000	119380000	152760000	174140000	223210000	214020000	194530000	225300000
Q5M9N8;Q3UBI6;P14148;Q3TK73;F6XI62	tr|Q5M9N8|Q5M9N8_MOUSE Ribosomal protein L7 OS=Mus musculus GN=Rpl7 PE=1 SV=1;tr|Q3UBI6|Q3UBI6_MOUSE Uncharacterized protein OS=Mus musculus GN=Rpl7 PE=2 SV=1;sp|P14148|RL7_MOUSE 60S ribosomal protein L7 OS=Mus musculus GN=Rpl7 PE=1 SV=2;tr|Q3TK73|Q3TK73_M	5	13	13	13	38.1	31.419		776940000	84059000	71377000	131190000	68062000	65429000	109140000	71674000	73532000	102480000
P14152;B1ATQ3	sp|P14152|MDHC_MOUSE Malate dehydrogenase, cytoplasmic OS=Mus musculus GN=Mdh1 PE=1 SV=3	2	10	10	10	32.9	36.511		792450000	103550000	106670000	96405000	69006000	71716000	92971000	85131000	81794000	85206000
P14576;Q99JZ9;E9PXC0;Q8C1Y6;A0A1W2P809;A0A1Y7VJJ0	sp|P14576|SRP54_MOUSE Signal recognition particle 54 kDa protein OS=Mus musculus GN=Srp54 PE=1 SV=2;tr|Q99JZ9|Q99JZ9_MOUSE Signal recognition particle 54 kDa protein OS=Mus musculus GN=Srp54c PE=2 SV=1;tr|E9PXC0|E9PXC0_MOUSE Signal recognition particle 54	6	6	6	6	15.3	55.72		16801000	2019800	344260	689930	2088500	1726800	3296800	2185000	2646900	1802900
Q8BK46;P14685;Q3U5M8;Q3ULJ5;F7B7L8	tr|Q8BK46|Q8BK46_MOUSE Uncharacterized protein OS=Mus musculus GN=Psmd3 PE=2 SV=1;sp|P14685|PSMD3_MOUSE 26S proteasome non-ATPase regulatory subunit 3 OS=Mus musculus GN=Psmd3 PE=1 SV=3;tr|Q3U5M8|Q3U5M8_MOUSE Uncharacterized protein OS=Mus musculus GN=Psmd	5	10	10	10	21.1	60.722		43714000	4431000	4042000	4009300	5050600	5780300	6119600	4993900	5677500	3609500
P14733;Q8C553	sp|P14733|LMNB1_MOUSE Lamin-B1 OS=Mus musculus GN=Lmnb1 PE=1 SV=3;tr|Q8C553|Q8C553_MOUSE Uncharacterized protein (Fragment) OS=Mus musculus GN=Lmnb1 PE=2 SV=1	2	34	34	31	51.9	66.785		925320000	90821000	93518000	91179000	88137000	83349000	128100000	100210000	108190000	141820000
Q3U5H8;Q3U5U6;P14901;Q3TVV4	tr|Q3U5H8|Q3U5H8_MOUSE Uncharacterized protein (Fragment) OS=Mus musculus GN=Hmox1 PE=2 SV=1;tr|Q3U5U6|Q3U5U6_MOUSE Uncharacterized protein OS=Mus musculus GN=Hmox1 PE=1 SV=1;sp|P14901|HMOX1_MOUSE Heme oxygenase 1 OS=Mus musculus GN=Hmox1 PE=1 SV=1;tr|Q3TV	4	2	2	2	15.9	30.197		7750000	0	0	0	2059300	1428700	2343800	907380	1010800	0
Q5NC81;P15532;Q5NC80;Q5NC79	tr|Q5NC81|Q5NC81_MOUSE Nucleoside diphosphate kinase OS=Mus musculus GN=Nme1 PE=1 SV=1;sp|P15532|NDKA_MOUSE Nucleoside diphosphate kinase A OS=Mus musculus GN=Nme1 PE=1 SV=1;tr|Q5NC80|Q5NC80_MOUSE Nucleoside diphosphate kinase (Fragment) OS=Mus musculus GN	4	10	3	3	65.8	17.208		188800000	24121000	20985000	15900000	24325000	18402000	19891000	13970000	21914000	29287000
Q5SZA3;P15864;Q3UXH2;I7HFT9;Q07133	tr|Q5SZA3|Q5SZA3_MOUSE Histone cluster 1, H1c OS=Mus musculus GN=Hist1h1c PE=1 SV=1;sp|P15864|H12_MOUSE Histone H1.2 OS=Mus musculus GN=Hist1h1c PE=1 SV=2	5	16	16	7	44.8	21.266		38010000000	4152500000	4322200000	7485000000	3006100000	3168900000	3715100000	4040800000	4508800000	3610100000
P16045	sp|P16045|LEG1_MOUSE Galectin-1 OS=Mus musculus GN=Lgals1 PE=1 SV=3	1	7	7	7	60	14.866		1342900000	164270000	58020000	120320000	105400000	104980000	192480000	220880000	133710000	242880000
Q3V471;Q8C253;P16110;Q61357	tr|Q3V471|Q3V471_MOUSE Galectin (Fragment) OS=Mus musculus GN=Lgals3 PE=2 SV=1;tr|Q8C253|Q8C253_MOUSE Galectin OS=Mus musculus GN=Lgals3 PE=1 SV=1;sp|P16110|LEG3_MOUSE Galectin-3 OS=Mus musculus GN=Lgals3 PE=1 SV=3	4	5	5	5	30.1	19.937		706710000	44816000	25579000	28710000	94471000	72882000	157130000	87905000	78626000	116590000
P16125;D3Z7F0;Q5M8R7;A0A0N4SVV8;D3YVR7;D3YZE4;Q64483;Q548Z6;P00342	sp|P16125|LDHB_MOUSE L-lactate dehydrogenase B chain OS=Mus musculus GN=Ldhb PE=1 SV=2;tr|D3Z7F0|D3Z7F0_MOUSE L-lactate dehydrogenase (Fragment) OS=Mus musculus GN=Ldhb PE=1 SV=1	9	7	6	6	24	36.572		141210000	18009000	10846000	19060000	15761000	11084000	21074000	15255000	15955000	14170000
Q3TYL9;Q3TYV5;P16330	tr|Q3TYL9|Q3TYL9_MOUSE 2,3-cyclic-nucleotide 3-phosphodiesterase OS=Mus musculus GN=Cnp PE=2 SV=1;tr|Q3TYV5|Q3TYV5_MOUSE 2,3-cyclic-nucleotide 3-phosphodiesterase OS=Mus musculus GN=Cnp PE=2 SV=1;sp|P16330|CN37_MOUSE 2,3-cyclic-nucleotide 3-phosph	3	2	2	2	5.8	44.654		4695000	1538900	839570	0	0	466280	0	0	1228600	621690
Q3UJ34;Q3UEJ7;P16460	tr|Q3UJ34|Q3UJ34_MOUSE MCG19004 OS=Mus musculus GN=Ass1 PE=1 SV=1;tr|Q3UEJ7|Q3UEJ7_MOUSE Uncharacterized protein OS=Mus musculus GN=Ass1 PE=2 SV=1;sp|P16460|ASSY_MOUSE Argininosuccinate synthase OS=Mus musculus GN=Ass1 PE=1 SV=1	3	6	6	6	14.6	46.584		34644000	3487300	3803100	3651500	4239100	2756100	4901400	4703400	3157900	3944500
P16546;B9EKJ1;B2RXX6;A3KGU7;A3KGU9;A3KGU5;E9Q447;B7ZWK3;Q3V1V5;Q3URW8;Q3TYI8;Q6PA04;Q58ES7;A3KGU4;Q3TNY2;P08032	sp|P16546|SPTN1_MOUSE Spectrin alpha chain, non-erythrocytic 1 OS=Mus musculus GN=Sptan1 PE=1 SV=4;tr|B9EKJ1|B9EKJ1_MOUSE Spna2 protein OS=Mus musculus GN=Sptan1 PE=2 SV=1;tr|B2RXX6|B2RXX6_MOUSE Spna2 protein OS=Mus musculus GN=Sptan1 PE=2 SV=1;tr|A3KGU7|A	16	71	71	71	36.4	284.59		112000000	12256000	8895300	8437600	10869000	9047400	15866000	15585000	13259000	17782000
Q9CZU7;Q8C876;Q3UIW3;Q3TWE1;Q8C5K0;P17047	tr|Q9CZU7|Q9CZU7_MOUSE Uncharacterized protein OS=Mus musculus GN=Lamp2 PE=2 SV=1;tr|Q8C876|Q8C876_MOUSE Uncharacterized protein OS=Mus musculus GN=Lamp2 PE=2 SV=1;tr|Q3UIW3|Q3UIW3_MOUSE Uncharacterized protein OS=Mus musculus GN=Lamp2 PE=2 SV=1;tr|Q3TWE1|	6	5	5	5	12	45.673		200820000	17788000	16249000	20773000	16218000	19251000	20626000	29631000	26184000	34099000
Q3TE85;Q566K0;P17095	tr|Q3TE85|Q3TE85_MOUSE Uncharacterized protein OS=Mus musculus PE=2 SV=1;tr|Q566K0|Q566K0_MOUSE High mobility group AT-hook 1 OS=Mus musculus GN=Hmga1 PE=2 SV=1;sp|P17095|HMGA1_MOUSE High mobility group protein HMG-I/HMG-Y OS=Mus musculus GN=Hmga1 PE=1 SV=	3	6	6	2	38.7	11.485		566170000	63466000	117980000	86150000	50227000	40429000	47488000	49847000	73155000	37428000
Q5FW97;P17182;Q6PHC1;Q8CF78;B0QZL1;B1ARR7;Q4FK59;P21550;D3Z6E4;Q922A0;A0A0N4SUI6;B1ARR6;D3YVD3;J3QPZ9;Q5SX59;A0A0N4SUW8;Q5SX61;Q5SX60	tr|Q5FW97|Q5FW97_MOUSE Enolase 1, alpha non-neuron OS=Mus musculus GN=EG433182 PE=1 SV=1;sp|P17182|ENOA_MOUSE Alpha-enolase OS=Mus musculus GN=Eno1 PE=1 SV=3;tr|Q6PHC1|Q6PHC1_MOUSE Alpha-enolase OS=Mus musculus GN=Eno1 PE=1 SV=1	18	23	23	19	73	47.14		7016400000	665110000	651780000	616750000	719600000	726440000	1037500000	812120000	823310000	963770000
P17426;A0A140LHA6	sp|P17426|AP2A1_MOUSE AP-2 complex subunit alpha-1 OS=Mus musculus GN=Ap2a1 PE=1 SV=1	2	8	4	4	8.7	107.66		4567800	536390	826850	428920	435010	782050	615030	232740	710820	0
Q6PEE6;Q3U7X9;Q69ZW4;P17427	tr|Q6PEE6|Q6PEE6_MOUSE Adaptor protein complex AP-2, alpha 2 subunit OS=Mus musculus GN=Ap2a2 PE=2 SV=1;tr|Q3U7X9|Q3U7X9_MOUSE Uncharacterized protein OS=Mus musculus GN=Ap2a2 PE=2 SV=1;tr|Q69ZW4|Q69ZW4_MOUSE MKIAA0899 protein (Fragment) OS=Mus musculus GN	4	16	16	12	19.3	104		47649000	3449300	3043100	3415100	4794000	4533200	6140300	7048700	7514900	7710400
P17439;A0A0G2JDK2	sp|P17439|GLCM_MOUSE Glucosylceramidase OS=Mus musculus GN=Gba PE=1 SV=1;tr|A0A0G2JDK2|A0A0G2JDK2_MOUSE Glucosylceramidase OS=Mus musculus GN=Gba PE=1 SV=1	2	2	2	2	5	57.621		2570000	547650	178470	377910	0	0	0	447270	534700	483960
P17563;A0A0R4J135;Q63836;D6RHN2;G3UWK0;G3UZT2;G3UYY2	sp|P17563|SBP1_MOUSE Selenium-binding protein 1 OS=Mus musculus GN=Selenbp1 PE=1 SV=2;tr|A0A0R4J135|A0A0R4J135_MOUSE Selenium-binding protein 2 OS=Mus musculus GN=Selenbp2 PE=1 SV=1;sp|Q63836|SBP2_MOUSE Selenium-binding protein 2 OS=Mus musculus GN=Selenbp	7	5	5	5	12.7	52.513		16714000	2375700	1726000	1919500	1706900	1903400	2434900	1628300	1235700	1783100
Q5SVY2;Q3UAJ1;Q3TE63;P17742;Q9CZK9;A0A1L1SST0;F8VPN3;A0A1L1SRX5;V9GXC1;V9GX31	tr|Q5SVY2|Q5SVY2_MOUSE Peptidyl-prolyl cis-trans isomerase OS=Mus musculus GN=Ppia PE=1 SV=1;tr|Q3UAJ1|Q3UAJ1_MOUSE Peptidyl-prolyl cis-trans isomerase OS=Mus musculus GN=Ppia PE=2 SV=1;tr|Q3TE63|Q3TE63_MOUSE Peptidyl-prolyl cis-trans isomerase OS=Mus musc	10	11	11	11	69.5	17.971		6151400000	598160000	367160000	232130000	721650000	642150000	1056400000	776720000	779290000	977740000
P17751;H7BXC3	sp|P17751|TPIS_MOUSE Triosephosphate isomerase OS=Mus musculus GN=Tpi1 PE=1 SV=4;tr|H7BXC3|H7BXC3_MOUSE Triosephosphate isomerase OS=Mus musculus GN=Tpi1 PE=1 SV=1	2	11	11	11	47.8	32.191		1218800000	110270000	131320000	80277000	133670000	115470000	197500000	125580000	159470000	165250000
Q91ZH2;Q542J9;P17918;A0A140T8V5;Q9CZD6	tr|Q91ZH2|Q91ZH2_MOUSE Proliferating cell nuclear antigen OS=Mus musculus GN=Pcna PE=2 SV=1;tr|Q542J9|Q542J9_MOUSE Proliferating cell nuclear antigen OS=Mus musculus GN=Pcna PE=1 SV=1;sp|P17918|PCNA_MOUSE Proliferating cell nuclear antigen OS=Mus musculus	5	11	11	11	55.9	28.845		405250000	44309000	40579000	27858000	41569000	28925000	82505000	36839000	43365000	59304000
Q6P905;Q3UK50;Q18PH8;P18181	tr|Q6P905|Q6P905_MOUSE CD48 antigen OS=Mus musculus GN=Cd48 PE=2 SV=1;tr|Q3UK50|Q3UK50_MOUSE Uncharacterized protein OS=Mus musculus GN=Cd48 PE=2 SV=1;tr|Q18PH8|Q18PH8_MOUSE CD48 OS=Mus musculus GN=Cd48 PE=2 SV=1;sp|P18181|CD48_MOUSE CD48 antigen OS=Mus mu	4	2	2	2	10.8	27.411		4019700	251460	1465200	0	475840	0	386640	0	535780	904820
P18654;B1AXN9;A7E215;B1AXP0;F6UG16;B1AXN8;B1AXN5;B1AXN7	sp|P18654|KS6A3_MOUSE Ribosomal protein S6 kinase alpha-3 OS=Mus musculus GN=Rps6ka3 PE=1 SV=2;tr|B1AXN9|B1AXN9_MOUSE Ribosomal protein S6 kinase alpha-3 OS=Mus musculus GN=Rps6ka3 PE=1 SV=1;tr|A7E215|A7E215_MOUSE Rps6ka3 protein (Fragment) OS=Mus musculus	8	7	4	4	11.1	83.693		12089000	1157400	1017100	777050	1524100	1253100	657370	1025300	1950300	2727600
Q544Y7;P18760;F8WGL3;Q9CX22;Q3UHW9;P45591	tr|Q544Y7|Q544Y7_MOUSE Cofilin 1, non-muscle OS=Mus musculus GN=Cfl1 PE=2 SV=1;sp|P18760|COF1_MOUSE Cofilin-1 OS=Mus musculus GN=Cfl1 PE=1 SV=3;tr|F8WGL3|F8WGL3_MOUSE Cofilin-1 OS=Mus musculus GN=Cfl1 PE=1 SV=1;tr|Q9CX22|Q9CX22_MOUSE Uncharacterized protei	6	15	15	14	69.3	18.559		6891900000	626700000	746190000	580110000	807680000	635330000	1066900000	726650000	838200000	864200000
P19157;K9JA74;P46425	sp|P19157|GSTP1_MOUSE Glutathione S-transferase P 1 OS=Mus musculus GN=Gstp1 PE=1 SV=2;tr|K9JA74|K9JA74_MOUSE Glutathione S-transferase pi 2 (Fragment) OS=Mus musculus GN=Gstp2 PE=2 SV=1;sp|P46425|GSTP2_MOUSE Glutathione S-transferase P 2 OS=Mus musculus G	3	5	5	4	28.6	23.609		166480000	13229000	16241000	18806000	18679000	17349000	21889000	10445000	22608000	27235000
Q5M9M0;P19253;A0A1B0GSB2;A0A1B0GSQ6;A0A1B0GS68;Q3TDS9;A0A1B0GTA1;A0A1B0GSC2;A0A1B0GRH1;A0A1B0GT00;A0A1B0GSJ2;A0A1B0GSL5;A0A140T8K2;A0A1B0GQW6;A0A1B0GSF0	tr|Q5M9M0|Q5M9M0_MOUSE MCG23455, isoform CRA_e OS=Mus musculus GN=Rpl13a PE=1 SV=1;sp|P19253|RL13A_MOUSE 60S ribosomal protein L13a OS=Mus musculus GN=Rpl13a PE=1 SV=4;tr|A0A1B0GSB2|A0A1B0GSB2_MOUSE 60S ribosomal protein L13a OS=Mus musculus GN=Rpl13a PE=1	15	7	7	7	33	23.464		307770000	23664000	36653000	49091000	23853000	19581000	29103000	17910000	19839000	88076000
Q9D881;P19536;F7C106;A0A0A6YVR0	tr|Q9D881|Q9D881_MOUSE Cytochrome c oxidase subunit 5B, mitochondrial OS=Mus musculus GN=Cox5b PE=1 SV=1;sp|P19536|COX5B_MOUSE Cytochrome c oxidase subunit 5B, mitochondrial OS=Mus musculus GN=Cox5b PE=1 SV=1	4	5	5	5	37.2	13.847		389720000	49928000	49293000	62915000	14654000	26034000	45518000	52351000	30519000	58514000
P19973;A2A6J4;A2A6J7;A0A1B0GRF5	sp|P19973|LSP1_MOUSE Lymphocyte-specific protein 1 OS=Mus musculus GN=Lsp1 PE=1 SV=2;tr|A2A6J4|A2A6J4_MOUSE Lymphocyte-specific protein 1 OS=Mus musculus GN=Lsp1 PE=1 SV=1;tr|A2A6J7|A2A6J7_MOUSE Lymphocyte-specific protein 1 OS=Mus musculus GN=Lsp1 PE=1 SV	4	9	9	9	41.8	36.713		529440000	44187000	32662000	38634000	46551000	61870000	112660000	46971000	61361000	84544000
Q3U9G2;Q3TWF2;P20029;Q3TKF8;Q3TI47;Q3U7T8;Q9DC41;Q3U6V3;Q3UEM8;Q3TUS2;O88687	tr|Q3U9G2|Q3U9G2_MOUSE Uncharacterized protein OS=Mus musculus GN=Hspa5 PE=2 SV=1;tr|Q3TWF2|Q3TWF2_MOUSE Uncharacterized protein OS=Mus musculus GN=Hspa5 PE=2 SV=1;sp|P20029|GRP78_MOUSE 78 kDa glucose-regulated protein OS=Mus musculus GN=Hspa5 PE=1 SV=3;tr	11	29	26	26	50.2	72.405		1333800000	120850000	131770000	159920000	129220000	137010000	195340000	134790000	164980000	159940000
Q3TXR9;P20060	tr|Q3TXR9|Q3TXR9_MOUSE Beta-hexosaminidase OS=Mus musculus GN=Hexb PE=1 SV=1;sp|P20060|HEXB_MOUSE Beta-hexosaminidase subunit beta OS=Mus musculus GN=Hexb PE=1 SV=2	2	15	15	15	28.7	61.115		177850000	24605000	12429000	19053000	11289000	10421000	15706000	21223000	29214000	33908000
Q8K4K8;P20108	tr|Q8K4K8|Q8K4K8_MOUSE Antioxidant protein OS=Mus musculus PE=4 SV=1;sp|P20108|PRDX3_MOUSE Thioredoxin-dependent peroxide reductase, mitochondrial OS=Mus musculus GN=Prdx3 PE=1 SV=1	2	2	2	2	7.5	27.686		38092000	6151700	2595900	2332300	3821400	4296600	5947400	5819400	5708400	1418400
Q5FWJ3;P20152;Q3V2S4;Q3U6S1;Q3TFD9;A0A0A6YWC8;Q3TWV0;Q3UAX1;Q3UD36;A4IF59;A2AKJ2;Q3V2C6;Q3V1K9;P31001;G5E846;G3X981;P15331;Q9JJY2;Q3UMG4;D3YZ35;Q05DD2;A0A0R4J036;Q80TQ3;P46660;P08551;P08553;P19246	tr|Q5FWJ3|Q5FWJ3_MOUSE Vimentin OS=Mus musculus GN=Vim PE=1 SV=1;sp|P20152|VIME_MOUSE Vimentin OS=Mus musculus GN=Vim PE=1 SV=3;tr|Q3V2S4|Q3V2S4_MOUSE Uncharacterized protein OS=Mus musculus GN=Vim PE=2 SV=1;tr|Q3U6S1|Q3U6S1_MOUSE Uncharacterized protein O	27	37	37	34	70.6	53.687		3764300000	376570000	412730000	388900000	397540000	321030000	561710000	373120000	466770000	465960000
P20491	sp|P20491|FCERG_MOUSE High affinity immunoglobulin epsilon receptor subunit gamma OS=Mus musculus GN=Fcer1g PE=1 SV=1	1	2	2	2	23.3	9.6523		778830000	71472000	114680000	51639000	86757000	65745000	109150000	73501000	92002000	113890000
Q5FW94;Q3UZF0;P20664;J3QN19	tr|Q5FW94|Q5FW94_MOUSE DNA primase OS=Mus musculus GN=Prim1 PE=1 SV=1;tr|Q3UZF0|Q3UZF0_MOUSE DNA primase OS=Mus musculus GN=Prim1 PE=2 SV=1;sp|P20664|PRI1_MOUSE DNA primase small subunit OS=Mus musculus GN=Prim1 PE=1 SV=1;tr|J3QN19|J3QN19_MOUSE DNA primase	4	2	2	2	7.7	49.295		2901900	149820	0	0	352920	555950	0	507980	696990	638230
Q3U5K7;Q9EPX9;P21460;A2APX3	tr|Q3U5K7|Q3U5K7_MOUSE Cystatin (Fragment) OS=Mus musculus GN=Cst3 PE=2 SV=1;tr|Q9EPX9|Q9EPX9_MOUSE Cystatin OS=Mus musculus GN=Cst3 PE=2 SV=1;sp|P21460|CYTC_MOUSE Cystatin-C OS=Mus musculus GN=Cst3 PE=1 SV=2;tr|A2APX3|A2APX3_MOUSE Cystatin (Fragment) OS=M	4	3	3	3	33.6	15.217		33778000	5396100	0	0	2702900	0	0	6797600	7243200	11638000
P21619;A0A0R4J0Q5;Q3V159	sp|P21619|LMNB2_MOUSE Lamin-B2 OS=Mus musculus GN=Lmnb2 PE=1 SV=2;tr|A0A0R4J0Q5|A0A0R4J0Q5_MOUSE Lamin-B2 OS=Mus musculus GN=Lmnb2 PE=1 SV=1;tr|Q3V159|Q3V159_MOUSE Uncharacterized protein OS=Mus musculus GN=Lmnb2 PE=2 SV=1	3	12	9	9	23.2	67.317		45718000	5210400	5020000	4642300	4762000	4088400	6243600	4757000	5211500	5783200
Q3UFK0;Q3TSZ8;Q3TI59;P21995	tr|Q3UFK0|Q3UFK0_MOUSE Uncharacterized protein OS=Mus musculus GN=Emb PE=2 SV=1;tr|Q3TSZ8|Q3TSZ8_MOUSE Uncharacterized protein OS=Mus musculus GN=Emb PE=2 SV=1;tr|Q3TI59|Q3TI59_MOUSE Uncharacterized protein OS=Mus musculus GN=Emb PE=2 SV=1;sp|P21995|EMB_MO	4	1	1	1	3	37.03		5895900	0	967150	922500	174880	648880	0	1142700	2039800	0
Q543T1;Q3UZ23;P22437;Q3TJN9	tr|Q543T1|Q543T1_MOUSE Prostaglandin-endoperoxide synthase 1 OS=Mus musculus GN=Ptgs1 PE=1 SV=1;tr|Q3UZ23|Q3UZ23_MOUSE Uncharacterized protein OS=Mus musculus GN=Ptgs1 PE=2 SV=1;sp|P22437|PGH1_MOUSE Prostaglandin G/H synthase 1 OS=Mus musculus GN=Ptgs1 PE=	4	5	5	5	8.3	69.042		13780000	1254500	618410	1192800	1362600	1472100	1639200	1688500	2256000	2296300
[truncated: 1,465 more rows]

## Sheet: bacterial protiens
Protein IDs	Fasta headers	Proteins	Peptides	Razor + unique peptides	Unique peptides	Sequence coverage [%]	Mol. weight [kDa]	PEP	Contaminant	iBAQ CON_1	iBAQ CON_2	iBAQ CON_3	iBAQ PMA_1	iBAQ PMA_2	iBAQ PMA_3	iBAQ S.suis_1	iBAQ S.suis_2	iBAQ S.suis_3
[truncated: 244 more rows]
